# Supplementary material for: Molecular evidence of the avocado defense response to Fusarium kuroshium infection: a deep transcriptome analysis using RNA-Seq
Source: PeerJ journal article supplement (doi:10.7717/peerj.11215), 2021-04-14
Supplement: Figure_S5.pdf [file Figure_S5.pdf]

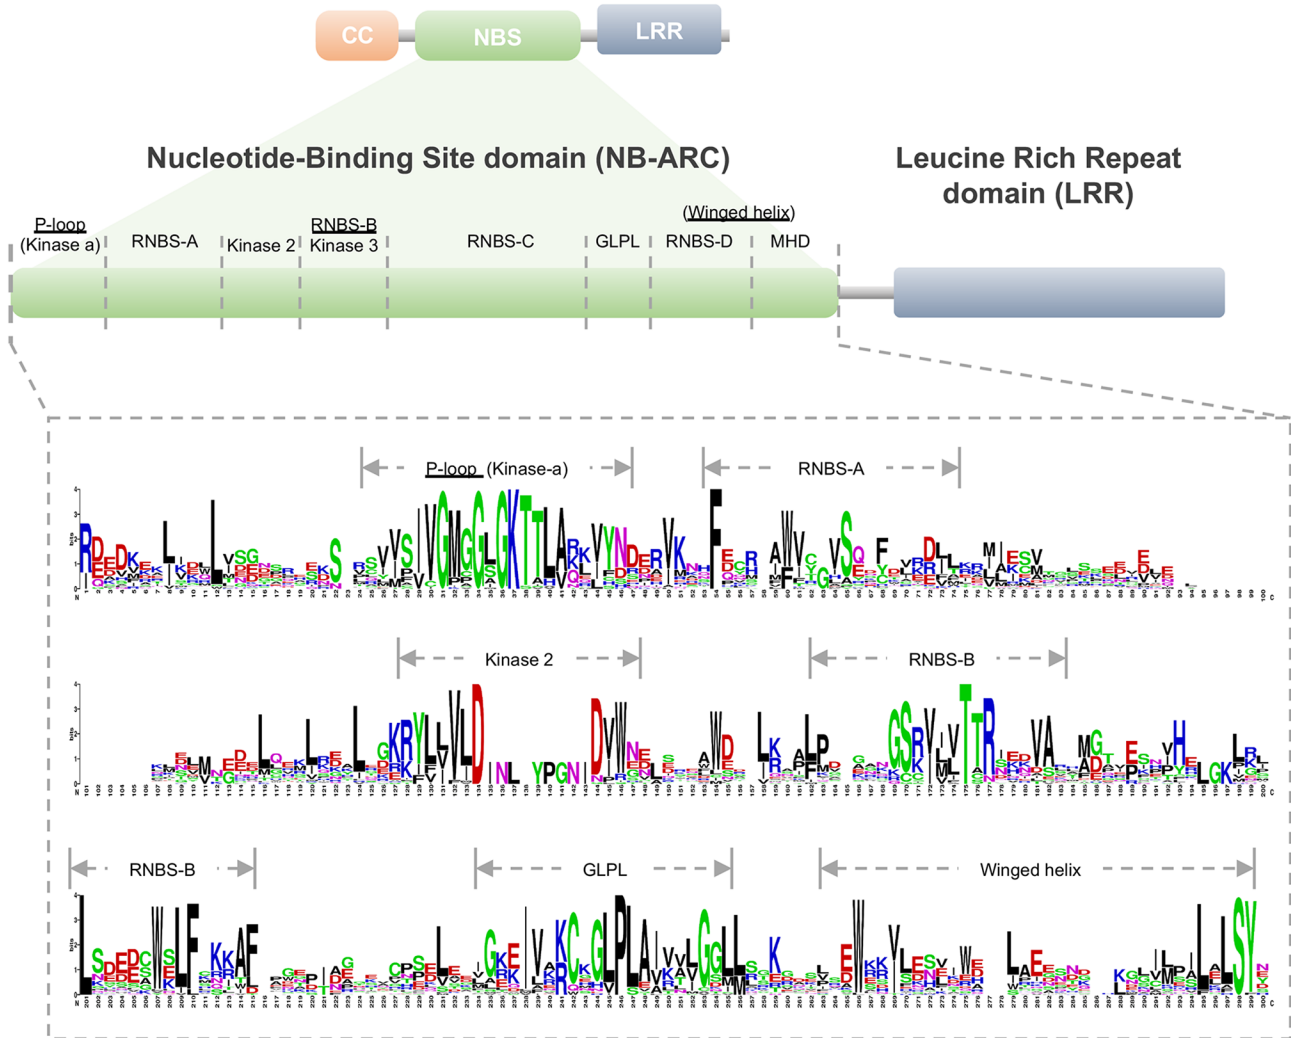

**Figure S5. Schematic representation of the motifs contained in the NBS domain of the avocado CC-type NLR proteins.** Schematic representation of the motifs contained in the NBS domain of the avocado CC-type NLR proteins. The consensus sequence of each of the highly conserved motifs in the NBS domain (P-loop, kinase, RNBS, GLPL, MHD; (Van Ghelder et al., 2019) was graphically displayed with WebLogo (Crooks et al., 2004) using small-sample correction (Schneider et al., 1986).
