# Supplementary material for: Molecular evidence of the avocado defense response to Fusarium kuroshium infection: a deep transcriptome analysis using RNA-Seq
Source: PeerJ. 2021 Apr 14;9:e11215. doi: 10.7717/peerj.11215 (PMC8052963; doi:10.7717/peerj.11215)
Supplement: Supplemental Information 7 [file peerj-09-11215-s007.xlsx]

## Sheet: Table S1
	Table S1. Summary of Illumina sequencing dataset generated in this study from infected or no infected avocado (Persea americana cv. Hass) stems segments. A single 1.6-mm-diameter hole was drilled into the avocado stems (4 mm deep), and a conidial suspension was placed into the wound by pipette (40 uL of F. kuroshium. conidia suspension at 1X108 conida/mL). Treatments were replicated three times a…
		Description			Library Identifier	Biological Replicate	Raw Paired-end Reads	HQ Paired-end Reads	Fusarium-like reads
	Avocado-Fusarium kuroshium interaction	1	Non-infected stem segments	day 1	EI1TA2SS43	1	17356933	11472568	---
		2			EI1TA2SS44	2	17537611	11498043	---
		3			EI1TA2SS45	3	15527131	10079830	---
		4		day 4	EI1TA2SS46	1	16674124	11434272	---
		5			EI1TA2SS47	2	16789053	12155627	---
		6			EI1TA2SS48	3	16039375	10619286	---
		7		day 7	EI1TA2SS49	1	15390971	10187688	---
		8			EI1TA2SS50	2	21284849	14063043	---
		9			EI1TA2SS51	3	28102252	20610244	---
		10		day 14	EI1TA2SS52	1	16409033	10844328	---
		11			EI1TA2SS53	2	19613829	14461176	---
		12			EI1TA2SS54	3	20777633	14199111	---
		13	Infected stem segments (days post-inoculation; dpi)	1-day post inoculation	EI1TA2SS55	1	26307386	18360572	3105287
		14			EI1TA2SS56	2	23298205	16396004	3215926
		15			EI1TA2SS57	3	19830953	13059584	2195287
		16		4-day post inoculation	EI1TA2SS58	1	22634058	15707756	3070812
		17			EI1TA2SS59	2	10676524	7353625	1813288
		18			EI1TA2SS60	3	10316879	7180523	1279802
		19		7-day post inoculation	EI1TA2SS61	1	16589571	11619011	2635037
		20			EI1TA2SS62	2	18915757	13159216	1497612
		21			EI1TA2SS63	3	13170036	8686683	1355932
		22		14-day post inoculation	EI1TA2SS64	1	20843710	14735819	3215089
		23			EI1TA2SS65	2	29952310	22771921	7883616
		24			EI1TA2SS66	3	20644694	14600827	4321109
						Total	454682877	315256757	35588797
						Average	1.89451e+07	1.31357e+07	2.96573e+06

## Sheet: Table S2
	Table S2. Annotation of Avocado non-redundant UniGenes. Before annotation process, erroneous frameshifts were corrected, and the redundancy was eliminated. AlignWise and BlastClust programs were used for such purpose (see Methods for more details). The annotation process involved BLASTp similarity searches against the proteins reported from closely related species, mostly asterid flowering plants…
	UniGene Identifier	Amborella trichopoda								Musa acuminata subsp. malaccensis								Zea mays								Solanum lycopersicum								Vitis vinifera								Prunus persica
		Accession No.	Description	Protein length (a.a)	Identity %	Alignment length (a.a.)	e-value	Score		Accession No.	Description	Protein length (a.a)	Identity %	Alignment length (a.a.)	e-value	Score		Accession No.	Description	Protein length (a.a)	Identity %	Alignment length (a.a.)	e-value	Score		Accession No.	Description	Protein length (a.a)	Identity %	Alignment length (a.a.)	e-value	Score		Accession No.	Description	Protein length (a.a)	Identity %	Alignment length (a.a.)	e-value	Score		Accession No.	Description	Protein length (a.a)	Identity %	Alignment length (a.a.)	e-value	Score
	UN000001	XM_020670662.1	DNA-directed RNA polymerase I subunit 1 (LOC18439963), transcript variant X2, mRNA	1563	28.63	255	2e-13	75.9		XM_009392901.2	DNA-directed RNA polymerase II subunit 1-like (LOC103977408), mRNA	1786	36.36	88	4e-06	52.4		XM_008657154.2	DNA-directed RNA polymerase I subunit 1 (LOC100279825), transcript variant X3, mRNA	1509	26.32	399	3e-13	75.9		XM_004251400.3	DNA-directed RNA polymerase III subunit 1 (LOC101265201), mRNA	1390	30.77	117	8e-08	57.4		XM_002284621.4	DNA-directed RNA polymerase III subunit 1 (LOC100267354), mRNA	1383	24.24	231	3e-07	55.8		XM_007208083.2	DNA-directed RNA polymerase III subunit 1 (LOC18773977), transcript variant X3, mRNA	1264	32.14	112	1e-07	56.6
	UN000005	XM_020667161.1	auxin transport protein BIG (LOC18433925), transcript variant X1, mRNA	5108	68.49	5132	0	6553		XM_009413895.2	auxin transport protein BIG (LOC103993721), mRNA	5104	67.45	5131	0	6539		XM_020540740.1	auxin transport protein BIG (LOC103633920), mRNA	5066	60.74	5130	0	5734		XM_004233609.3	auxin transport protein BIG (LOC101261294), mRNA	5104	65.38	5136	0	6220		XM_010662263.2	auxin transport protein BIG (LOC100256705), mRNA	5101	72.03	5130	0	7000		XM_020558980.1	auxin transport protein BIG (LOC18781773), mRNA	5102	70.11	5126	0	6836
	UN000006	---	---	0	---	---	---	---		---	---	0	---	---	---	---		---	---	0	---	---	---	---		---	---	0	---	---	---	---		---	---	0	---	---	---	---		---	---	0	---	---	---	---
	UN000007	---	---	0	---	---	---	---		---	---	0	---	---	---	---		XM_020546264.1	NAD(P)H-quinone oxidoreductase subunit 2 B, chloroplastic (LOC109943316), partial mRNA	508	97.23	506	0	945		---	---	0	---	---	---	---		XM_019218790.1	photosystem II CP47 reaction center protein-like (LOC109122277), mRNA	203	92.44	119	2e-59	195		---	---	0	---	---	---	---
	UN000008	---	---	0	---	---	---	---		---	---	0	---	---	---	---		XM_008649552.1	uncharacterized LOC100280595 (csu733(rpL39)), transcript variant X1, mRNA	486	48.21	390	1e-117	363		---	---	0	---	---	---	---		---	---	0	---	---	---	---		---	---	0	---	---	---	---
	UN000009	XM_020675338.1	midasin (LOC18447189), mRNA	5492	44.79	259	8e-54	210		XM_018828435.1	midasin (LOC103981671), transcript variant X3, mRNA	5445	47.43	253	7e-59	227		XM_008651538.2	midasin (LOC103630487), transcript variant X2, mRNA	5422	37.01	254	1e-34	147		XM_010321828.2	midasin (LOC101258364), transcript variant X2, mRNA	5475	40.08	242	2e-46	186		XM_010656183.2	midasin (LOC100244657), transcript variant X1, mRNA	5480	50.79	254	5e-64	244		XM_020559106.1	midasin (LOC18782305), transcript variant X3, mRNA	5361	44.74	266	5e-45	181
	UN000012	XM_020664702.1	uncharacterized LOC18430003 (LOC18430003), mRNA	4150	64.22	3262	0	4128		XM_009418336.2	uncharacterized LOC103997175 (LOC103997175), transcript variant X3, mRNA	4273	62.75	4266	0	5353		XM_020552861.1	uncharacterized LOC103654673 (LOC103654673), transcript variant X1, mRNA	4260	58.79	4271	0	4904		XM_010327626.2	uncharacterized LOC101262246 (LOC101262246), transcript variant X2, mRNA	4202	62.58	4270	0	5229		XM_010651348.2	uncharacterized LOC100258011 (LOC100258011), transcript variant X1, mRNA	4260	67.76	4265	0	5724		XM_020554180.1	uncharacterized LOC18789557 (LOC18789557), mRNA	4148	65.77	2945	0	3836
	UN000013	---	---	0	---	---	---	---		XM_009407469.2	ribulose bisphosphate carboxylase large chain (LOC103988823), mRNA	235	93.62	235	3e-150	428		---	---	0	---	---	---	---		---	---	0	---	---	---	---		XM_019221016.1	ribulose bisphosphate carboxylase large chain (LOC109122894), partial mRNA	181	97.16	176	4e-126	364		---	---	0	---	---	---	---
	UN000014	XM_020669624.1	sacsin (LOC18437599), transcript variant X2, mRNA	4751	67.66	1818	0	2481		XM_009399996.2	sacsin (LOC103982909), transcript variant X2, mRNA	4750	67.23	1822	0	2482		NM_001347939.1	NM_001347939.1 length 4756 aa, 14271 bp, from 30..14300 of NM_001347939.1 Zea mays Zinc finger C3HC4 type (RING finger) family protein (LOC100501244), mRNA	4756	62.61	1816	0	2292		XM_010317254.1	sacsin (LOC101259792), transcript variant X1, mRNA	4766	62.51	1798	0	2259		XM_010650117.2	sacsin (LOC100245596), mRNA	4783	69.38	1796	0	2494		XM_007221869.2	sacsin (LOC18792718), mRNA	4774	67.93	1827	0	2486
	UN000016	XM_020666357.1	uncharacterized PI3/PI4-kinase family protein C1F5.11c (LOC18432797), mRNA	3304	77.72	1692	0	2712		XM_009403311.2	transformation/transcription domain-associated protein-like (LOC103985570), mRNA	3916	80.9	3702	0	5881		XM_020541489.1	transformation/transcription domain-associated protein (LOC100382790), transcript variant X1, mRNA	3877	76.26	3715	0	5529		XM_004232439.3	transformation/transcription domain-associated protein (LOC101258912), transcript variant X2, mRNA	3923	80.28	3738	0	5848		XM_003631847.3	transcription-associated protein 1 (LOC100255847), transcript variant X1, mRNA	3906	83.35	3718	0	6058		XM_007203898.2	transformation/transcription domain-associated protein (LOC18770359), transcript variant X1, mRNA	3925	81.43	3732	0	5918
	UN000017	XM_020675510.1	E3 ubiquitin-protein ligase UPL1 (LOC18447617), transcript variant X1, mRNA	3787	63.17	2020	0	1969		XM_009397237.2	E3 ubiquitin-protein ligase UPL1-like (LOC103980751), transcript variant X3, mRNA	3668	69.69	1211	0	1459		XM_008670005.2	E3 ubiquitin-protein ligase UPL1 (LOC100304346), transcript variant X1, mRNA	3715	56.84	2004	0	1731		XM_010325947.2	E3 ubiquitin-protein ligase UPL1 (LOC101249744), mRNA	3815	63.34	2013	0	1998		XM_010646286.2	E3 ubiquitin-protein ligase UPL1 (LOC100246297), transcript variant X2, mRNA	3782	76.7	1193	0	1635		XM_007208346.2	E3 ubiquitin-protein ligase UPL1 (LOC18774532), transcript variant X1, mRNA	3807	67.95	1997	0	2188
	UN000018	XM_020673277.1	uncharacterized LOC18443778 (LOC18443778), mRNA	4368	60.96	3709	0	4469		XM_009414979.2	uncharacterized LOC103994598 (LOC103994598), transcript variant X1, mRNA	4362	61.08	3702	0	4390		XM_008661701.2	uncharacterized LOC103638912 (LOC103638912), transcript variant X1, mRNA	4195	54.01	2194	0	2280		XM_010327231.2	uncharacterized LOC101254928 (LOC101254928), transcript variant X2, mRNA	4324	60.25	3696	0	4434		XM_010665867.2	uncharacterized LOC100260794 (LOC100260794), mRNA	4371	67.01	3695	0	4900		XM_020563802.1	uncharacterized LOC18777913 (LOC18777913), mRNA	4340	63.89	3700	0	4706
	UN000020	XM_020672416.1	E3 ubiquitin-protein ligase UPL2 (LOC18442602), transcript variant X2, mRNA	3675	65.55	1469	0	1824		XM_009405983.2	E3 ubiquitin-protein ligase UPL1-like (LOC103987632), mRNA	3656	66.96	1465	0	1842		XM_008675998.2	E3 ubiquitin-protein ligase UPL1-like (LOC103650429), mRNA	3631	63.06	1462	0	1695		XM_010321927.2	E3 ubiquitin-protein ligase UPL2 (LOC101261615), mRNA	3658	65.3	1461	0	1816		XM_010666134.2	E3 ubiquitin-protein ligase UPL2 (LOC100255704), mRNA	3691	71.67	1479	0	1988		XM_020558191.1	E3 ubiquitin-protein ligase UPL2 (LOC18791510), mRNA	3693	69.6	1464	0	1947
	UN000022	XM_020664437.1	protein SPIRRIG (LOC18429578), mRNA	3600	74.54	3605	0	5128		XM_009394778.2	protein SPIRRIG-like (LOC103978832), transcript variant X1, mRNA	3586	72.45	3612	0	4965		XM_020537662.1	uncharacterized LOC100381565 (LOC100381565), transcript variant X1, mRNA	3581	69.91	3549	0	4771		XM_004247154.3	protein SPIRRIG (LOC101267054), mRNA	3587	71.93	3613	0	4975		XM_019218023.1	protein SPIRRIG (LOC100264735), mRNA	3598	76.11	3613	0	5246		XM_007201718.2	protein SPIRRIG (LOC18766937), mRNA	3611	75.25	3612	0	5214
	UN000023	XM_020672428.1	BEACH domain-containing protein B (LOC18442628), transcript variant X1, mRNA	3292	64.57	3305	0	4156		XM_009395046.2	BEACH domain-containing protein B (LOC103979036), mRNA	3259	66.6	3278	0	4301		NM_001350030.1	NM_001350030.1 length 3212 aa, 9639 bp, from 328..9966 of NM_001350030.1 Zea mays uncharacterized LOC100382952 (LOC100382952), mRNA	3212	60.1	3286	0	3844		XM_010321916.2	BEACH domain-containing protein B (LOC101247317), transcript variant X1, mRNA	3276	64.31	3284	0	4078		XM_010666119.2	BEACH domain-containing protein B (LOC100259143), transcript variant X1, mRNA	3264	70.08	3275	0	4540		XM_020554536.1	BEACH domain-containing protein B (LOC18789304), transcript variant X1, mRNA	3258	67.68	3289	0	4302
	UN000025	XM_011624264.2	uncharacterized LOC18432027 (LOC18432027), transcript variant X1, mRNA	3258	59.06	3288	0	3499		XM_009411066.2	uncharacterized LOC103991571 (LOC103991571), mRNA	3257	55.76	3316	0	3292		XM_008667445.2	uncharacterized LOC103644246 (LOC103644246), transcript variant X2, mRNA	3099	49.1	3295	0	2749		XM_010321492.2	uncharacterized LOC101246131 (LOC101246131), mRNA	3207	53.28	3296	0	3015		XM_010654573.2	uncharacterized LOC100247348 (LOC100247348), transcript variant X2, mRNA	3261	61.76	3311	0	3687		XM_020567008.1	uncharacterized LOC18772520 (LOC18772520), transcript variant X1, mRNA	3212	58.84	3314	0	3474
	UN000026	XM_020675713.1	BEACH domain-containing protein C2 (LOC18447846), transcript variant X3, mRNA	2985	70.87	2990	0	3707		XM_009384103.2	BEACH domain-containing protein C2 (LOC103970353), mRNA	2950	73.5	2860	0	3788		XM_020548190.1	BEACH domain-containing protein C2 (LOC103646096), transcript variant X2, mRNA	2923	66.95	2929	0	3407		XM_010327812.2	BEACH domain-containing protein C2 (LOC101244711), mRNA	2957	67.69	3005	0	3637		XM_002270739.3	BEACH domain-containing protein C2 (LOC100247154), transcript variant X1, mRNA	2997	73.11	2975	0	3932		XM_007220505.2	BEACH domain-containing protein C2 (LOC18784991), mRNA	2983	71.27	2972	0	3787
	UN000028	XM_020664584.1	chromatin structure-remodeling complex protein SYD (LOC18429767), transcript variant X1, mRNA	2013	79.08	478	0	742		XM_009404867.2	uncharacterized LOC103986774 (LOC103986774), transcript variant X2, mRNA	4060	79.8	490	0	773		XM_008649930.2	uncharacterized LOC100383943 (umc1614), transcript variant X1, mRNA	3828	79.49	468	0	726		XM_010314910.2	chromatin structure-remodeling complex protein SYD (LOC101247785), transcript variant X2, mRNA	3316	77.14	490	0	709		XM_010651496.2	chromatin structure-remodeling complex protein SYD (LOC100254600), transcript variant X3, mRNA	3713	82.35	476	0	741		XM_020563259.1	chromatin structure-remodeling complex protein SYD (LOC18791851), mRNA	4011	83.66	459	0	735
	UN000030	XM_020674591.1	uncharacterized LOC18446022 (LOC18446022), transcript variant X3, mRNA	3729	64.32	2859	0	3519		XM_009396010.2	serine/threonine-protein kinase SMG1-like (LOC103979792), transcript variant X4, mRNA	3662	63.39	2841	0	3462		XM_008667149.2	serine/threonine-protein kinase SMG1 (LOC103643975), transcript variant X2, mRNA	3691	55.27	2844	0	2934		XM_010316979.2	serine/threonine-protein kinase SMG1-like (LOC101268042), transcript variant X1, mRNA	3720	62.31	2836	0	3423		XM_010649529.2	uncharacterized LOC100260579 (LOC100260579), mRNA	3789	68.6	2847	0	3753		XM_007199607.2	serine/threonine-protein kinase SMG1 (LOC18767777), mRNA	3792	65.43	2855	0	3565
	UN000031	XM_020670638.1	uncharacterized LOC18439600 (LOC18439600), mRNA	2472	44.17	1449	0	1051		XM_018829160.1	uncharacterized LOC103992724 (LOC103992724), transcript variant X2, mRNA	2368	49.41	1429	0	1285		XM_008658352.2	transducin family protein / WD-40 repeat family protein (LOC103635990), transcript variant X1, mRNA	2449	40.89	1416	0	987		XM_010328865.2	uncharacterized LOC101249217 (LOC101249217), transcript variant X1, mRNA	2515	46.26	1444	0	1171		XM_019225607.1	uncharacterized LOC100255258 (LOC100255258), transcript variant X4, mRNA	2148	54.04	1423	0	1466		XM_020556439.1	uncharacterized LOC18784615 (LOC18784615), transcript variant X1, mRNA	2550	50.49	1424	0	1332
	UN000033	XM_020668014.1	rootletin (LOC18435686), mRNA	2892	44.3	2183	0	1461		XM_018819212.1	golgin subfamily B member 1 (LOC103969692), transcript variant X6, mRNA	2526	42.45	2186	0	1298		NM_001323078.1	NM_001323078.1 length 2717 aa, 8154 bp, from 132..8285 of NM_001323078.1 Zea mays sporulation-specific protein 15 (LOC103626620), mRNA	2717	35.66	2218	0	944		XM_010326239.2	nuclear mitotic apparatus protein 1 (LOC101253008), transcript variant X5, mRNA	2646	41	2195	0	1305		XM_010650549.2	GRIP and coiled-coil domain-containing protein 2 (LOC100260617), transcript variant X7, mRNA	2623	48.31	2188	0	1618		XM_020569502.1	protein lava lamp (LOC18793820), transcript variant X4, mRNA	2897	45.06	2168	0	1451
	UN000034	XM_020672481.1	protein SABRE (LOC18442615), transcript variant X1, mRNA	2695	66.92	2591	0	3359		XM_009407424.2	protein SABRE (LOC103988790), transcript variant X1, mRNA	2683	66.82	2562	0	3413		XM_008669908.2	Golgi-body localization protein domain (cl27571_1), transcript variant X1, mRNA	2674	58.08	2555	0	2794		XM_004237966.3	protein SABRE (LOC101260131), transcript variant X1, mRNA	2654	66.17	2557	0	3306		XM_010666125.2	protein SABRE (LOC100254031), transcript variant X1, mRNA	2660	70.96	2552	0	3586		XM_020563670.1	protein SABRE (LOC18792737), transcript variant X1, mRNA	2682	66.4	2589	0	3303
	UN000035	XM_006828329.3	uncharacterized LOC18423745 (LOC18423745), transcript variant X3, mRNA	2492	48.5	1136	0	712		XM_009405742.2	uncharacterized LOC103987434 (LOC103987434), transcript variant X1, mRNA	2400	43.19	1065	4e-177	605		NM_001348667.1	NM_001348667.1 length 2268 aa, 6807 bp, from 311..7117 of NM_001348667.1 Zea mays uncharacterized LOC100274068 (LOC100274068), mRNA	2268	39.74	1004	4e-131	462		XM_010317841.2	uncharacterized LOC101252655 (LOC101252655), transcript variant X1, mRNA	2429	50.69	1014	0	727		XM_010654511.2	uncharacterized LOC100266406 (LOC100266406), transcript variant X1, mRNA	2486	56.07	1095	0	947		XM_020568356.1	uncharacterized LOC18771198 (LOC18771198), transcript variant X2, mRNA	2511	52.94	1073	0	833
	UN000036	XM_020673603.1	increased DNA methylation 1 (LOC18444177), transcript variant X2, mRNA	1730	68.12	436	0	632		XM_009388399.2	increased DNA methylation 1-like (LOC103973752), mRNA	1655	63.66	432	0	585		XM_008665537.2	Increased DNA methylation 1 (LOC103642225), transcript variant X2, mRNA	1347	55.69	422	2e-164	498		XM_010326085.2	increased DNA methylation 1 (LOC101265659), transcript variant X3, mRNA	1160	64.27	431	0	586		XM_019217158.1	increased DNA methylation 1 (LOC100248637), transcript variant X2, mRNA	1416	68.29	432	0	627		XM_020561198.1	increased DNA methylation 1 (LOC18778304), transcript variant X1, mRNA	1504	70.74	434	0	659
	UN000037	XM_006848256.3	dnaJ homolog subfamily C GRV2 (LOC18438064), mRNA	2679	81.4	2586	0	3894		XM_009385855.2	dnaJ homolog subfamily C GRV2 (LOC103971748), mRNA	2640	80.53	2578	0	3841		XM_020547360.1	uncharacterized LOC100272361 (LOC100272361), transcript variant X1, mRNA	2631	75.93	2568	0	3630		XM_004244803.3	dnaJ homolog subfamily C GRV2 (LOC101264235), transcript variant X1, mRNA	2626	78.92	2576	0	3794		XM_002281506.3	dnaJ homolog subfamily C GRV2 (LOC100262770), transcript variant X1, mRNA	2646	85.04	2580	0	4083		XM_020569199.1	dnaJ homolog subfamily C GRV2 (LOC18769128), transcript variant X1, mRNA	2650	83.29	2579	0	4020
	UN000038	XM_011628938.2	lysine-specific histone demethylase 1 homolog 3 (LOC18444624), mRNA	2122	42.31	78	3e-06	51.2		---	---	0	---	---	---	---		---	---	0	---	---	---	---		---	---	0	---	---	---	---		XM_010666463.2	lysine-specific histone demethylase 1 homolog 3 (LOC100255769), transcript variant X1, mRNA	2157	36.87	217	4e-12	70.5		XM_007225423.2	lysine-specific histone demethylase 1 homolog 3 (LOC18789487), mRNA	1890	37.33	217	2e-12	71.2
	UN000039	XM_020665004.1	uncharacterized LOC18430385 (LOC18430385), transcript variant X6, mRNA	3205	49.04	2851	0	2459		XM_018830463.1	uncharacterized LOC103995576 (LOC103995576), transcript variant X2, mRNA	3217	47.4	2804	0	2368		XM_008649945.2	putative vacuolar protein sorting-associated protein 13A (LOC100384121), transcript variant X3, mRNA	3148	41.36	2814	0	1923		XM_010314799.2	uncharacterized LOC101246789 (LOC101246789), transcript variant X2, mRNA	3501	42.8	2853	0	2015		XM_010662888.2	uncharacterized LOC100245550 (LOC100245550), mRNA	3527	51.46	2839	0	2560		XM_020560276.1	uncharacterized LOC18782062 (LOC18782062), transcript variant X4, mRNA	3101	48.62	2824	0	2345
	UN000041	XM_020673523.1	protein ILITYHIA (LOC18444148), mRNA	2612	76.04	2609	0	3768		XM_009412614.2	eIF-2-alpha kinase activator GCN1 (LOC103992771), mRNA	2627	75.14	2607	0	3783		XM_020552933.1	protein ILITYHIA-like (LOC103656035), transcript variant X2, mRNA	2624	69.64	2605	0	3477		XM_010321520.2	eIF-2-alpha kinase activator GCN1 (LOC101246338), mRNA	2628	73.4	2598	0	3690		XM_010650645.2	eIF-2-alpha kinase activator GCN1 (LOC100248532), transcript variant X2, mRNA	2641	78.69	2619	0	3950		XM_020567237.1	protein ILITYHIA (LOC18774590), transcript variant X1, mRNA	2624	76.26	2612	0	3860
	UN000042	XM_006838945.3	U3 small nucleolar RNA-associated protein 20 (LOC18429662), mRNA	2766	51.97	2382	0	2175		XM_009401072.2	small subunit processome component 20 homolog (LOC103983790), transcript variant X1, mRNA	2741	55.2	2730	0	2771		XM_020550700.1	small subunit processome component 20 homolog (LOC103649658), mRNA	2675	48.31	2699	0	2329		XM_010328557.2	small subunit processome component 20 homolog (LOC101248519), mRNA	2686	52.99	2723	0	2581		XM_010652025.2	small subunit processome component 20 homolog (LOC100255444), mRNA	2710	60.03	2722	0	3061		XM_020559512.1	small subunit processome component 20 homolog (LOC18781727), transcript variant X1, mRNA	2807	56.25	2738	0	2778
	UN000044	XM_020671260.1	piezo-type mechanosensitive ion channel homolog (LOC18440663), transcript variant X1, mRNA	2485	70.6	2493	0	3345		XM_009388906.2	piezo-type mechanosensitive ion channel homolog (LOC103974143), transcript variant X1, mRNA	2502	68.3	2486	0	3209		XM_020550231.1	piezo-type mechanosensitive ion channel homolog (LOC103652011), transcript variant X1, mRNA	2535	64.28	2500	0	3017		XM_010328318.2	piezo-type mechanosensitive ion channel homolog (LOC101266159), transcript variant X1, mRNA	2475	64.93	2501	0	3055		XM_019221093.1	piezo-type mechanosensitive ion channel homolog (LOC100254568), transcript variant X1, mRNA	2487	69.02	2492	0	3251		XM_020569861.1	piezo-type mechanosensitive ion channel homolog (LOC18766419), transcript variant X1, mRNA	2485	68.39	2499	0	3210
	UN000045	XM_020671260.1	piezo-type mechanosensitive ion channel homolog (LOC18440663), transcript variant X1, mRNA	2485	70.54	2488	0	3339		XM_009388906.2	piezo-type mechanosensitive ion channel homolog (LOC103974143), transcript variant X1, mRNA	2502	68.34	2486	0	3212		XM_020550231.1	piezo-type mechanosensitive ion channel homolog (LOC103652011), transcript variant X1, mRNA	2535	64.21	2498	0	3014		XM_010328318.2	piezo-type mechanosensitive ion channel homolog (LOC101266159), transcript variant X1, mRNA	2475	65.33	2486	0	3054		XM_019221093.1	piezo-type mechanosensitive ion channel homolog (LOC100254568), transcript variant X1, mRNA	2487	68.78	2492	0	3246		XM_020569861.1	piezo-type mechanosensitive ion channel homolog (LOC18766419), transcript variant X1, mRNA	2485	68.8	2487	0	3209
	UN000047	XM_006851098.3	histone-lysine N-methyltransferase ATXR3 (LOC18440968), transcript variant X1, mRNA	2308	56.56	2111	0	2178		XM_009406730.2	histone-lysine N-methyltransferase ATXR3-like (LOC103988177), transcript variant X1, mRNA	2377	57.37	2442	0	2517		XM_008663256.2	Histone-lysine N-methyltransferase ATXR3 (LOC100194363), transcript variant X2, mRNA	2279	54.53	1867	0	1919		XM_010325486.2	histone-lysine N-methyltransferase ATXR3 (LOC101244888), mRNA	2454	51.87	2516	0	2316		XM_010659038.2	histone-lysine N-methyltransferase ATXR3 (LOC100263702), transcript variant X1, mRNA	2410	59.2	2441	0	2591		XM_020560698.1	histone-lysine N-methyltransferase ATXR3 (LOC18783386), mRNA	2463	59.59	2415	0	2591
	UN000049	---	---	0	---	---	---	---		---	---	0	---	---	---	---		---	---	0	---	---	---	---		XM_004228523.3	protein Ycf2-like (LOC101257292), mRNA	2278	89.88	583	0	1020		---	---	0	---	---	---	---		---	---	0	---	---	---	---
	UN000052	XM_006827539.3	RNA polymerase II transcription subunit 12 (LOC18422866), transcript variant X2, mRNA	2276	56.4	211	8e-42	170		XM_009399660.2	mediator of RNA polymerase II transcription subunit 12-like (LOC103982672), mRNA	2221	58.54	205	5e-33	141		NM_001176697.1	NM_001176697.1 length 359 aa, 1080 bp, from 93..1172 of NM_001176697.1 Zea mays uncharacterized LOC100384108 (umc1505), mRNA	359	54.25	212	4e-38	148		XM_004229830.3	mediator of RNA polymerase II transcription subunit 12 (LOC101246089), transcript variant X1, mRNA	2262	52.58	213	8e-27	120		XM_002274443.4	mediator of RNA polymerase II transcription subunit 12 (LOC100263628), transcript variant X5, mRNA	2275	63.46	208	5e-36	151		XM_020558219.1	mediator of RNA polymerase II transcription subunit 12 (LOC18784567), transcript variant X1, mRNA	2280	57.35	204	6e-38	157
	UN000053	XM_020667034.1	methyl-CpG-binding domain-containing protein 9 (LOC18434092), transcript variant X2, mRNA	2219	49.81	1588	0	1327		XM_009393654.2	methyl-CpG-binding domain-containing protein 9 (LOC103977968), mRNA	2226	48.14	2044	0	1682		XM_008681674.2	methyl-CpG-binding domain-containing protein 9 (LOC103654852), mRNA	1884	46.25	1187	0	937		XM_004239302.3	methyl-CpG-binding domain-containing protein 9 (LOC101248775), transcript variant X1, mRNA	2151	38.78	2205	0	1285		XM_010655059.2	methyl-CpG-binding domain-containing protein 9 (LOC100258715), transcript variant X1, mRNA	2090	46.76	1974	0	1560		XM_020559034.1	methyl-CpG-binding domain-containing protein 9 (LOC18782558), mRNA	2289	51.47	1527	0	1339
	UN000055	XM_011624243.2	uncharacterized LOC18432072 (LOC18432072), mRNA	2542	71.03	2561	0	3447		XM_009395782.2	uncharacterized LOC103979610 (LOC103979610), mRNA	1479	60.12	1472	0	1620		XM_020550577.1	uncharacterized LOC103652610 (LOC103652610), transcript variant X3, mRNA	2438	60.59	2540	0	2836		XM_004245368.3	protein DDB_G0276689 (LOC101259468), transcript variant X2, mRNA	2509	67.07	2542	0	3143		XM_010650286.2	protein DDB_G0276689 (LOC100262933), transcript variant X1, mRNA	2524	73.75	2545	0	3590		XM_020555987.1	uncharacterized LOC18793494 (LOC18793494), transcript variant X1, mRNA	2609	71.52	2556	0	3451
	UN000057	XM_006856441.3	pre-mRNA-processing-splicing factor 8A (LOC18446319), mRNA	2348	95.67	2358	0	4567		XM_009386901.2	pre-mRNA-processing-splicing factor 8A (LOC103972541), mRNA	2362	95.43	2362	0	4547		XM_008650629.2	pre-mRNA-processing-splicing factor 8A (LOC103629533), mRNA	2366	95.26	2319	0	4481		XM_004242776.3	pre-mRNA-processing-splicing factor 8A (LOC101261833), mRNA	2390	95.92	2330	0	4543		XM_003632714.3	pre-mRNA-processing-splicing factor 8A (LOC100257584), mRNA	2347	97.24	2358	0	4611		XM_020560586.1	pre-mRNA-processing-splicing factor 8A (LOC18782263), mRNA	2347	95.84	2358	0	4571
	UN000058	XM_006828331.3	serine/threonine-protein kinase TOR (LOC18423738), transcript variant X3, mRNA	2474	81.77	2479	0	3998		XM_009396742.1	serine/threonine-protein kinase TOR (LOC103980358), mRNA	2470	81.24	2474	0	3944		NM_001111823.1	NM_001111823.1 length 2464 aa, 7395 bp, from 1..7395 of NM_001111823.1 Zea mays uncharacterized LOC542211 (cl3114_1(600)), mRNA	2464	76	2442	0	3585		XM_004230627.3	serine/threonine-protein kinase TOR (LOC101259295), transcript variant X2, mRNA	2469	81.94	2475	0	4048		XM_002275555.4	serine/threonine-protein kinase TOR (LOC100249713), mRNA	2469	83.66	2473	0	4100		XM_020569802.1	serine/threonine-protein kinase TOR (LOC18766256), mRNA	2475	83.29	2477	0	4088
	UN000060	XM_020664017.1	CCR4-NOT transcription complex subunit 1 (LOC18428828), transcript variant X1, mRNA	2427	63.48	2467	0	3065		XM_009384150.2	CCR4-NOT transcription complex subunit 1 (LOC103970388), transcript variant X1, mRNA	2436	65.35	2479	0	3117		XM_008660769.2	transcription regulator (LOC100502409), transcript variant X1, mRNA	2402	56.69	2466	0	2615		XM_010327224.2	CCR4-NOT transcription complex subunit 1 (LOC101267935), mRNA	2411	62.74	2464	0	2985		XM_019226148.1	CCR4-NOT transcription complex subunit 1 (LOC100256945), transcript variant X2, mRNA	2453	67.59	2453	0	3271		XM_020556540.1	CCR4-NOT transcription complex subunit 1 (LOC18787307), transcript variant X1, mRNA	2394	65.76	2465	0	3134
	UN000061	XM_020661932.1	MAG2-interacting protein 2 (LOC18421467), transcript variant X1, mRNA	2489	50.64	2502	0	2307		XM_009412803.2	MAG2-interacting protein 2 (LOC103992901), mRNA	2465	53.08	2436	0	2388		XM_008656182.2	MAG2-interacting protein 2 (LOC100193870), transcript variant X1, mRNA	2511	46.28	2461	0	2012		XM_019212653.1	MAG2-interacting protein 2 (LOC101256264), mRNA	2426	52.28	2437	0	2325		XM_019226146.1	MAG2-interacting protein 2 (LOC100258836), transcript variant X1, mRNA	2439	59.25	2439	0	2766		XM_020556310.1	MAG2-interacting protein 2 (LOC18785852), transcript variant X1, mRNA	2428	55.98	2435	0	2602
	UN000062	XM_020665413.1	acetyl-CoA carboxylase 1 (LOC18422110), transcript variant X2, mRNA	2265	81.14	2264	0	3779		XM_009381914.2	acetyl-CoA carboxylase 1 (LOC103968636), mRNA	2276	81.12	2267	0	3799		XM_008682948.2	uncharacterized LOC100193636 (TIDP3607), transcript variant X3, mRNA	2265	74.64	2283	0	3481		XM_004252493.3	acetyl-CoA carboxylase 1-like (LOC101250973), mRNA	2267	79.04	2266	0	3676		XM_010666001.2	acetyl-CoA carboxylase 1 (LOC100247288), transcript variant X3, mRNA	2266	81.96	2267	0	3809		XM_007221874.2	acetyl-CoA carboxylase 1 (LOC18789357), transcript variant X1, mRNA	2264	82.31	2261	0	3803
	UN000063	XM_020673258.1	uncharacterized LOC18444006 (LOC18444006), mRNA	2139	60.72	1843	0	2067		XM_018826370.1	uncharacterized LOC103983860 (LOC103983860), transcript variant X1, mRNA	2168	56.91	2156	0	2114		XM_020547547.1	uncharacterized LOC100272722 (LOC100272722), transcript variant X3, mRNA	2037	50.17	2039	0	1697		XM_019215379.1	uncharacterized LOC101254835 (LOC101254835), transcript variant X2, mRNA	2183	56.1	2148	0	2000		XM_010662863.2	uncharacterized LOC100252352 (LOC100252352), transcript variant X1, mRNA	2154	64.61	2029	0	2343		XM_007220510.2	uncharacterized LOC18785433 (LOC18785433), transcript variant X1, mRNA	2154	62.33	2031	0	2225
	UN000066	XM_006838331.3	uncharacterized LOC18429037 (LOC18429037), transcript variant X1, mRNA	2322	70.85	199	1e-79	294		XM_009395467.2	uncharacterized LOC103979351 (LOC103979351), mRNA	2240	71.86	199	2e-78	291		XM_008683295.2	uncharacterized LOC100274006 (LOC100274006), transcript variant X2, mRNA	2190	72.28	202	1e-83	308		XM_010319254.2	uncharacterized LOC101258924 (LOC101258924), mRNA	2196	71.69	166	7e-66	249		XM_010654711.2	uncharacterized LOC100246722 (LOC100246722), mRNA	2230	74.37	199	1e-82	304		XM_020568063.1	uncharacterized LOC18771672 (LOC18771672), transcript variant X2, mRNA	2256	68.87	212	5e-79	292
	UN000067	XM_006856239.3	calpain-type cysteine protease DEK1 (LOC18446098), transcript variant X1, mRNA	2142	81.6	2120	0	3089		XM_009405649.2	calpain-type cysteine protease ADL1 (LOC103987364), transcript variant X1, mRNA	2163	78.21	2134	0	3020		NM_001112058.1	NM_001112058.1 length 2159 aa, 6480 bp, from 55..6534 of NM_001112058.1 Zea mays defective kernel 1 (dek1), mRNA	2159	73.61	2133	0	2875		XM_010316366.2	calpain-type cysteine protease DEK1 (LOC101266917), transcript variant X1, mRNA	2142	80.55	2154	0	3095		XM_010653083.2	calpain-type cysteine protease DEK1 (LOC100244915), transcript variant X1, mRNA	2176	83.4	2132	0	3248		XM_007208351.2	calpain-type cysteine protease DEK1 (LOC18775568), transcript variant X1, mRNA	2160	83.21	2162	0	3256
	UN000068	XM_006847905.3	protein furry homolog-like (LOC18437705), transcript variant X1, mRNA	2127	77.04	2178	0	3289		XM_009396004.2	protein furry homolog-like (LOC103979781), mRNA	2216	79.25	2169	0	3405		XM_008678822.2	ARM repeat superfamily protein (LOC100278485), transcript variant X2, mRNA	2238	75.44	2166	0	3237		XM_004232076.3	protein furry homolog (LOC101247677), transcript variant X1, mRNA	2172	81.04	2162	0	3517		XM_010662246.2	protein furry homolog-like (LOC100251481), transcript variant X1, mRNA	2154	83.49	2162	0	3610		XM_007217074.2	uncharacterized LOC18782758 (LOC18782758), mRNA	2152	81.91	2161	0	3531
	UN000069	XM_011626070.2	uncharacterized LOC18436881 (LOC18436881), mRNA	2441	53.47	952	0	952		XM_009418651.2	uncharacterized LOC103997440 (LOC103997440), transcript variant X1, mRNA	2005	50.23	1089	0	916		XM_008683007.2	uncharacterized LOC100194077 (LOC100194077), transcript variant X1, mRNA	1815	55.15	709	0	710		XM_010321419.2	histone-lysine N-methyltransferase ASHH2 (LOC101245641), mRNA	1396	50	972	0	866		XM_010665861.2	uncharacterized LOC100245350 (LOC100245350), transcript variant X1, mRNA	2288	51.62	1176	0	1069		XM_020555892.1	histone-lysine N-methyltransferase ASHH2 (LOC18789579), transcript variant X1, mRNA	2136	40.15	1808	0	1028
	UN000070	XM_020664834.1	chromatin modification-related protein EAF1 B (LOC18430024), transcript variant X1, mRNA	2054	44.24	1562	0	923		XM_018828555.1	chromatin modification-related protein EAF1 B-like (LOC103992013), transcript variant X7, mRNA	1965	45.01	2035	0	1227		XM_020543422.1	chromatin modification-related protein EAF1 B (LOC103637041), transcript variant X19, mRNA	1797	37.49	1795	0	783		XM_004247242.3	chromatin modification-related protein EAF1 B-like (LOC101265768), transcript variant X1, mRNA	2003	40.89	2047	0	1070		XM_010654220.2	chromatin modification-related protein EAF1 B (LOC100267035), transcript variant X1, mRNA	2023	50.47	2007	0	1429		XM_020569786.1	chromatin modification-related protein EAF1 B (LOC18768734), transcript variant X2, mRNA	2070	47.44	2030	0	1334
	UN000071	XM_020664000.1	golgin subfamily A member 4 (LOC18422154), mRNA	2060	41.65	1311	0	743		XM_009410875.2	sporulation-specific protein 15-like (LOC103991421), transcript variant X1, mRNA	2019	44.19	1265	0	872		XM_008676274.2	sporulation-specific protein 15 (LOC103650707), mRNA	1888	38.34	1205	0	583		XM_004238463.3	putative leucine-rich repeat-containing protein DDB_G0290503 (LOC101260724), transcript variant X1, mRNA	2156	39.41	883	2e-138	466		XM_010665983.2	centromere-associated protein E (LOC100255792), mRNA	1920	49.48	1245	0	1011		XM_020555460.1	early endosome antigen 1 (LOC18790893), transcript variant X1, mRNA	2229	48.07	855	0	627
	UN000073	XM_006826946.3	protein CELLULOSE SYNTHASE INTERACTIVE 1 (LOC18422126), transcript variant X1, mRNA	2155	80.47	2156	0	3247		XM_009417219.2	uncharacterized LOC103996322 (LOC103996322), transcript variant X1, mRNA	2149	79.44	2155	0	3253		XM_020544078.1	protein CELLULOSE SYNTHASE INTERACTIVE 1-like (LOC103637845), transcript variant X1, mRNA	2146	76.88	2154	0	3053		XM_010321458.2	uncharacterized LOC101244277 (LOC101244277), transcript variant X3, mRNA	2152	79.53	2154	0	3178		XM_010654536.2	uncharacterized LOC100264630 (LOC100264630), mRNA	2150	82.13	2154	0	3296		XM_020567256.1	protein CELLULOSE SYNTHASE INTERACTIVE 1 (LOC18774043), transcript variant X1, mRNA	2145	81.33	2153	0	3290
	UN000074	XM_020666652.1	E3 ubiquitin-protein ligase listerin (LOC18433543), transcript variant X4, mRNA	1672	51.58	1262	0	1161		XM_009419693.2	E3 ubiquitin-protein ligase listerin (LOC103998270), transcript variant X1, mRNA	1933	48.56	1248	0	1073		XM_008671676.2	E3 ubiquitin-protein ligase listerin (LOC103647118), transcript variant X1, mRNA	1903	43.93	1252	0	942		XM_010327951.2	E3 ubiquitin-protein ligase listerin (LOC101247956), mRNA	1874	46.86	1242	0	985		XM_010652541.2	E3 ubiquitin-protein ligase listerin (LOC100267314), mRNA	1904	52.02	1236	0	1197		XM_020566849.1	E3 ubiquitin-protein ligase listerin (LOC18772225), transcript variant X1, mRNA	1908	49.84	1246	0	1131
	UN000075	XM_011626489.2	ATP-dependent helicase BRM (LOC18422975), transcript variant X2, mRNA	2250	63.38	2190	0	2398		XM_009387948.2	ATP-dependent helicase BRM-like (LOC103973394), mRNA	2276	62.7	2233	0	2424		XM_008683220.2	uncharacterized LOC100273430 (pco141670(283)), transcript variant X1, mRNA	2237	58.05	2150	0	2109		XM_010328205.2	ATP-dependent helicase BRM (LOC101245796), transcript variant X1, mRNA	2243	61.94	2215	0	2284		XM_002276209.4	ATP-dependent helicase BRM (LOC100249945), mRNA	2271	68.37	2216	0	2696		XM_007220375.2	ATP-dependent helicase BRM (LOC18784757), mRNA	2326	66.62	2220	0	2601
	UN000076	XM_020664173.1	TATA-binding protein-associated factor BTAF1 (LOC18429143), transcript variant X2, mRNA	2065	72.29	2075	0	2729		XM_009399533.2	TATA-binding protein-associated factor BTAF1 (LOC103982567), mRNA	2041	68.93	2079	0	2569		XM_008651860.2	TATA-binding protein-associated factor BTAF1 (LOC103630794), transcript variant X1, mRNA	2062	65.74	2078	0	2417		XM_010327352.2	TATA-binding protein-associated factor BTAF1 (LOC101244404), transcript variant X1, mRNA	2050	68.64	2073	0	2567		XM_002275249.4	TATA-binding protein-associated factor BTAF1 (LOC100247209), transcript variant X3, mRNA	2052	73.32	2069	0	2773		XM_020567244.1	TATA-binding protein-associated factor BTAF1 (LOC18774613), transcript variant X1, mRNA	2051	69.73	2068	0	2645
	UN000078	XM_020664236.1	HEAT repeat-containing protein 5B (LOC18422070), mRNA	2148	62.67	2017	0	2349		XM_018827855.1	HEAT repeat-containing protein 5B (LOC103986806), transcript variant X6, mRNA	2240	60.05	2055	0	2283		XM_008661441.2	HEAT repeat-containing protein 5B (LOC103638564), transcript variant X1, mRNA	2242	56.18	2047	0	2053		XM_004232323.3	HEAT repeat-containing protein 5B (LOC101247084), transcript variant X1, mRNA	2425	59.58	2046	0	2234		XM_002279944.4	HEAT repeat-containing protein 5B (LOC100263559), mRNA	2264	61.58	2207	0	2489		XM_020568682.1	HEAT repeat-containing protein 5B (LOC18769488), transcript variant X2, mRNA	2232	60.18	2195	0	2429
	UN000079	XM_020667488.1	serine/threonine-protein kinase ATM (LOC18434891), transcript variant X2, mRNA	3054	62.95	2294	0	2811		XM_009405643.2	serine/threonine-protein kinase ATM (LOC103987359), mRNA	3016	63.84	2268	0	2783		XM_020550149.1	serine/threonine-protein kinase ATM (LOC103651852), transcript variant X2, mRNA	3009	56.46	2292	0	2427		XM_010320675.2	serine/threonine-protein kinase ATM (LOC101253578), transcript variant X1, mRNA	3032	61.66	2285	0	2723		XM_010664876.2	serine/threonine-protein kinase ATM (LOC100250198), transcript variant X2, mRNA	3043	68.47	2287	0	3061		XM_020563871.1	serine/threonine-protein kinase ATM (LOC18775824), mRNA	3026	66.03	2287	0	2913
	UN000080	XM_006849862.3	DExH-box ATP-dependent RNA helicase DExH12 (LOC18439704), transcript variant X2, mRNA	2171	84.36	2168	0	3575		XM_009396133.2	DExH-box ATP-dependent RNA helicase DExH12 (LOC103979888), transcript variant X1, mRNA	2172	84.71	2165	0	3578		XM_008655178.2	DExH-box ATP-dependent RNA helicase DExH12 (LOC103633484), mRNA	2239	77.8	2185	0	3323		XM_004242467.2	DExH-box ATP-dependent RNA helicase DExH12 (LOC101255504), mRNA	2180	82.85	2169	0	3548		XM_002266544.3	DExH-box ATP-dependent RNA helicase DExH12 (LOC100244096), transcript variant X1, mRNA	2177	85.89	2168	0	3657		XM_007208348.2	DExH-box ATP-dependent RNA helicase DExH12 (LOC18771989), transcript variant X1, mRNA	2180	81.55	2168	0	3471
	UN000081	XM_006852008.3	uncharacterized LOC18441782 (LOC18441782), transcript variant X2, mRNA	2141	37.16	1566	0	827		XM_009388889.2	uncharacterized LOC103974129 (LOC103974129), transcript variant X1, mRNA	2074	41.84	2127	0	1432		XM_008645302.2	hypothetical protein (LOC100381737), transcript variant X1, mRNA	1952	32.72	1522	0	618		XM_010329116.2	uncharacterized LOC101247970 (LOC101247970), transcript variant X1, mRNA	2055	40.04	2103	0	1287		XM_010649002.2	uncharacterized LOC100248664 (LOC100248664), transcript variant X1, mRNA	2142	47.03	2137	0	1676		XM_007200886.2	uncharacterized LOC18766781 (LOC18766781), transcript variant X1, mRNA	2128	43.42	2142	0	1553
	UN000082	XM_006841888.3	uncharacterized LOC18431771 (LOC18431771), mRNA	2133	53.35	2152	0	2030		XM_009418859.2	uncharacterized LOC103997590 (LOC103997590), mRNA	2018	55.95	2050	0	2100		XM_020546868.1	uncharacterized LOC103643822 (LOC103643822), mRNA	1920	59.53	976	0	1124		XM_004245334.3	uncharacterized LOC101245276 (LOC101245276), mRNA	2005	53.77	1977	0	1957		XM_010650001.2	uncharacterized LOC100254195 (LOC100254195), transcript variant X2, mRNA	1992	60.91	2072	0	2303		XM_007225422.2	uncharacterized LOC18793878 (LOC18793878), mRNA	1969	56.77	2084	0	2101
	UN000083	XM_006844330.3	uncharacterized LOC18434256 (LOC18434256), mRNA	2233	59.41	2264	0	2429		XM_009418773.2	uncharacterized LOC103997529 (LOC103997529), transcript variant X1, mRNA	2208	69.15	1637	0	2154		XM_008675404.2	uncharacterized LOC103649669 (LOC103649669), transcript variant X1, mRNA	2123	65.89	1633	0	2077		XM_010326851.2	uncharacterized LOC101257991 (LOC101257991), transcript variant X1, mRNA	2247	70.01	1604	0	2144		XM_010650259.1	uncharacterized LOC100247424 (LOC100247424), transcript variant X2, mRNA	2230	64.04	2255	0	2607		XM_020564483.1	uncharacterized LOC18789241 (LOC18789241), transcript variant X1, mRNA	2175	71.93	1639	0	2266
	UN000085	XM_006851658.3	uncharacterized LOC18441425 (LOC18441425), transcript variant X1, mRNA	2132	71.69	597	0	780		XM_009422849.2	transcriptional activator DEMETER-like (LOC104000735), transcript variant X1, mRNA	2048	75.13	571	0	785		NM_001320528.1	NM_001320528.1 length 1917 aa, 5754 bp, from 357..6110 of NM_001320528.1 Zea mays Protein ROS1 (LOC100280151), mRNA	1917	50.48	1137	0	882		XM_010327636.2	protein ROS1 (LOC101244311), mRNA	1856	50.86	1158	0	926		XM_010655735.2	transcriptional activator DEMETER (LOC100257983), transcript variant X1, mRNA	1942	54.84	1158	0	985		XM_007203148.2	transcriptional activator DEMETER (LOC18770234), transcript variant X1, mRNA	1993	70.52	614	0	800
	UN000087	XM_020663136.1	DNA-directed RNA polymerase V subunit 1 (LOC18427455), transcript variant X1, mRNA	1919	48.45	1742	0	1509		XM_009392915.2	DNA-directed RNA polymerase V subunit 1 (LOC103977421), transcript variant X1, mRNA	1738	53.43	1675	0	1685		XM_008681721.2	DNA-directed RNA polymerase V subunit 1 (LOC103654914), mRNA	1932	46.58	1915	0	1621		XM_019210941.1	DNA-directed RNA polymerase V subunit 1 (LOC778258), transcript variant X1, mRNA	1984	50.06	1798	0	1609		XM_002265497.4	DNA-directed RNA polymerase V subunit 1 (LOC100266900), mRNA	1855	53.66	1871	0	1869		XM_007218819.2	DNA-directed RNA polymerase V subunit 1 (LOC18785507), transcript variant X4, mRNA	1913	50.47	1922	0	1776
	UN000089	XM_006846122.3	E3 ubiquitin-protein ligase PRT6 (LOC18436096), transcript variant X1, mRNA	2061	55.51	1434	0	1345		XM_009406322.2	E3 ubiquitin-protein ligase PRT6 (LOC103987877), transcript variant X1, mRNA	2090	54.75	2093	0	1896		XM_020549443.1	E3 ubiquitin-protein ligase PRT6 (LOC100192707), transcript variant X3, mRNA	2087	49.12	2109	0	1748		XM_010313989.2	E3 ubiquitin-protein ligase PRT6 (LOC101261865), transcript variant X5, mRNA	2043	52.91	2079	0	1871		XM_010655981.2	E3 ubiquitin-protein ligase PRT6 (LOC100245881), mRNA	2083	55.73	2076	0	2032		XM_007204884.2	E3 ubiquitin-protein ligase PRT6 (LOC18775321), transcript variant X1, mRNA	2109	55.42	2086	0	1975
	UN000090	XM_011629135.2	uncharacterized LOC18445287 (LOC18445287), transcript variant X4, mRNA	1728	42.3	1877	0	877		XM_009393305.2	uncharacterized LOC103977716 (LOC103977716), transcript variant X1, mRNA	1767	37.36	1863	0	677		XM_008655225.2	uncharacterized LOC103633544 (LOC103633544), transcript variant X1, mRNA	1669	51.44	278	1e-55	215		XM_010322768.2	uncharacterized LOC101248911 (LOC101248911), transcript variant X1, mRNA	1660	31.57	890	6e-82	300		XM_010653750.2	uncharacterized LOC100254466 (LOC100254466), mRNA	1743	42.6	1864	0	895		XM_020569630.1	uncharacterized LOC18767729 (LOC18767729), mRNA	1692	39.71	1876	0	723
	UN000091	XM_020663136.1	DNA-directed RNA polymerase V subunit 1 (LOC18427455), transcript variant X1, mRNA	1919	47.08	1937	0	1635		XM_009392915.2	DNA-directed RNA polymerase V subunit 1 (LOC103977421), transcript variant X1, mRNA	1738	52.73	1866	0	1847		XM_008681721.2	DNA-directed RNA polymerase V subunit 1 (LOC103654914), mRNA	1932	46.67	1907	0	1623		XM_019210941.1	DNA-directed RNA polymerase V subunit 1 (LOC778258), transcript variant X1, mRNA	1984	50.14	1797	0	1610		XM_002265497.4	DNA-directed RNA polymerase V subunit 1 (LOC100266900), mRNA	1855	53.91	1868	0	1869		XM_020558534.1	DNA-directed RNA polymerase V subunit 1 (LOC18785507), transcript variant X1, mRNA	1883	50.29	1917	0	1774
	UN000097	XM_020664930.1	thyroid adenoma-associated protein homolog (LOC18421927), mRNA	2287	55.77	2340	0	2406		XM_009395427.2	thyroid adenoma-associated protein homolog (LOC103979324), transcript variant X1, mRNA	2220	59.3	2258	0	2497		XM_008664579.2	thyroid adenoma-associated protein homolog (LOC103641217), mRNA	2161	54.39	2265	0	2254		XM_010319590.2	thyroid adenoma-associated protein homolog (LOC101261303), mRNA	2192	57.5	2252	0	2415		XM_002277922.4	thyroid adenoma-associated protein homolog (LOC100257679), mRNA	2223	63.54	2263	0	2739		XM_020559753.1	thyroid adenoma-associated protein homolog (LOC18782511), mRNA	2260	61.06	2255	0	2633
	UN000098	XM_011623082.2	uncharacterized LOC18428846 (LOC18428846), transcript variant X1, mRNA	2165	46.16	1447	0	888		XM_009402586.2	uncharacterized LOC103984704 (LOC103984704), transcript variant X4, mRNA	2159	43.12	1438	0	801		XM_020543766.1	uncharacterized LOC100382533 (LOC100382533), transcript variant X5, mRNA	2049	40.44	1187	7e-156	533		XM_004246109.3	uncharacterized LOC101252108 (LOC101252108), transcript variant X3, mRNA	2155	54.55	165	9e-32	137		XM_010648227.1	uncharacterized LOC100266068 (LOC100266068), transcript variant X2, mRNA	2299	48.1	1472	0	977		XM_020564310.1	serine-rich adhesin for platelets (LOC18777292), transcript variant X3, mRNA	2313	44.12	1412	0	843
	UN000099	XM_020668864.1	protein CELLULOSE SYNTHASE INTERACTIVE 3 (LOC18436926), transcript variant X4, mRNA	2148	77.71	2118	0	3049		XM_018827561.1	uncharacterized LOC103989064 (LOC103989064), transcript variant X1, mRNA	2132	73.86	2108	0	2925		XM_008669105.2	Armadillo/beta-catenin-like repeat (LOC100216660), transcript variant X1, mRNA	2140	65.19	2106	0	2551		XM_004250547.3	uncharacterized LOC101265885 (LOC101265885), transcript variant X3, mRNA	2178	71.05	2107	0	2865		XM_002285833.4	uncharacterized LOC100260874 (LOC100260874), transcript variant X1, mRNA	2140	78.44	2110	0	3137		XM_020568155.1	protein CELLULOSE SYNTHASE INTERACTIVE 3 (LOC18789674), transcript variant X1, mRNA	2136	76.13	2107	0	3084
	UN000100	XM_020663656.1	uncharacterized protein At3g06530 (LOC18428242), transcript variant X3, mRNA	2207	50.16	2205	0	1977		XM_009384176.2	uncharacterized protein At3g06530 (LOC103970409), transcript variant X1, mRNA	2167	52.42	2194	0	2140		NM_001349879.1	NM_001349879.1 length 2203 aa, 6612 bp, from 13..6624 of NM_001349879.1 Zea mays uncharacterized LOC100193917 (gpm697), mRNA	2203	45.64	2202	0	1859		XM_010319873.2	uncharacterized protein At3g06530 (LOC101267297), transcript variant X1, mRNA	2149	48.29	2191	0	1947		XM_010663957.2	uncharacterized protein At3g06530 (LOC100256070), mRNA	2160	56.15	2194	0	2283		XM_020557039.1	uncharacterized protein At3g06530 (LOC18787348), transcript variant X1, mRNA	2151	52.42	2190	0	2086
	UN000101	XM_006828568.3	1-phosphatidylinositol-3-phosphate 5-kinase FAB1B (LOC18423974), transcript variant X1, mRNA	1877	62.58	1916	0	2193		XM_009392926.2	1-phosphatidylinositol-3-phosphate 5-kinase FAB1B-like (LOC103977429), transcript variant X3, mRNA	1815	60.53	1862	0	2028		XM_008658432.2	1-phosphatidylinositol-3-phosphate 5-kinase FAB1B (LOC103636073), transcript variant X1, mRNA	1822	55.62	1877	0	1769		XM_004235482.3	1-phosphatidylinositol-3-phosphate 5-kinase FAB1B-like (LOC101246905), transcript variant X4, mRNA	1784	58.72	1841	0	1975		XM_010656070.2	1-phosphatidylinositol-3-phosphate 5-kinase FAB1B (LOC100254952), transcript variant X1, mRNA	1847	65.99	1876	0	2283		XM_020561070.1	1-phosphatidylinositol-3-phosphate 5-kinase FAB1B (LOC18781849), transcript variant X1, mRNA	1823	64.04	1869	0	2175
	UN000102	XM_011623780.2	protein PHOTOPERIOD-INDEPENDENT EARLY FLOWERING 1 (LOC18430795), transcript variant X1, mRNA	2125	70.52	1584	0	1989		XM_009394636.2	protein PHOTOPERIOD-INDEPENDENT EARLY FLOWERING 1 (LOC103978734), transcript variant X1, mRNA	2037	66.78	1695	0	2046		XM_008680740.2	protein PHOTOPERIOD-INDEPENDENT EARLY FLOWERING 1 (LOC103653935), transcript variant X3, mRNA	2013	64.77	1564	0	1778		XM_010319601.2	protein PHOTOPERIOD-INDEPENDENT EARLY FLOWERING 1 (LOC101248082), partial mRNA	2084	73.81	1088	0	1544		XM_010655598.2	protein PHOTOPERIOD-INDEPENDENT EARLY FLOWERING 1 (LOC100248703), mRNA	2049	66.55	1710	0	2068		XM_020561910.1	protein PHOTOPERIOD-INDEPENDENT EARLY FLOWERING 1 (LOC18778158), transcript variant X2, mRNA	2143	68.62	1584	0	1905
	UN000103	XM_020668696.1	uncharacterized LOC18995828 (LOC18995828), transcript variant X8, mRNA	2624	48.83	1325	0	1150		XM_009393833.2	uncharacterized LOC103978134 (LOC103978134), mRNA	2685	47.53	1334	0	1116		XM_020544061.1	Helicase protein MOM1 (LOC103638205), transcript variant X5, mRNA	2109	42.06	1348	0	927		XM_019214371.1	uncharacterized LOC101255404 (LOC101255404), mRNA	2758	44.3	1316	0	979		XM_010652893.2	helicase protein MOM1 (LOC100258707), transcript variant X1, mRNA	2508	52.86	1328	0	1291		XM_020565235.1	helicase protein MOM1 (LOC18775197), transcript variant X2, mRNA	2570	53.25	877	0	882
	UN000104	XM_011622801.2	uncharacterized LOC18428017 (LOC18428017), transcript variant X1, mRNA	2012	38.06	2023	0	915		XM_009408037.2	uncharacterized LOC103989238 (LOC103989238), transcript variant X1, mRNA	1692	32.79	927	3e-103	368		XM_008654421.2	hypothetical protein (LOC103632668), transcript variant X1, mRNA	1552	36.4	662	2e-84	308		XM_004252399.3	uncharacterized LOC101247194 (LOC101247194), transcript variant X1, mRNA	1791	35.61	643	9e-95	341		XM_010664960.2	uncharacterized LOC100265641 (LOC100265641), transcript variant X6, mRNA	1880	42.16	1938	0	1144		XM_007210425.2	uncharacterized LOC18777358 (LOC18777358), transcript variant X9, mRNA	1961	38.76	1953	0	976
	UN000106	XM_020668696.1	uncharacterized LOC18995828 (LOC18995828), transcript variant X8, mRNA	2624	52.99	1087	0	1103		XM_009393833.2	uncharacterized LOC103978134 (LOC103978134), mRNA	2685	49.86	1077	0	1045		XM_020544061.1	Helicase protein MOM1 (LOC103638205), transcript variant X5, mRNA	2109	46.03	1045	0	912		XM_019214371.1	uncharacterized LOC101255404 (LOC101255404), mRNA	2758	47.58	1118	0	975		XM_010652893.2	helicase protein MOM1 (LOC100258707), transcript variant X1, mRNA	2508	49.62	1465	0	1302		XM_020565234.1	helicase protein MOM1 (LOC18775197), transcript variant X1, mRNA	2577	45.53	1465	0	1080
	UN000107	XM_020666119.1	nuclear-pore anchor (LOC110007092), transcript variant X1, mRNA	2043	55.44	1692	0	1605		XM_018818338.1	nuclear-pore anchor (LOC103997930), mRNA	2050	51.1	2082	0	1629		XM_008678333.2	Nuclear-pore anchor (LOC100193455), transcript variant X2, mRNA	2018	49.52	1781	0	1358		XM_004240960.3	nuclear-pore anchor (LOC101248882), transcript variant X3, mRNA	2053	48.53	2046	0	1539		XM_010646780.2	nuclear-pore anchor (LOC100251875), transcript variant X1, mRNA	2088	58.89	2087	0	1996		XM_020561916.1	nuclear-pore anchor (LOC18780683), transcript variant X2, mRNA	2073	56.85	2028	0	1848
	UN000108	XM_020671832.1	uncharacterized LOC18441682 (LOC18441682), transcript variant X5, mRNA	1745	51.58	475	7e-138	473		XM_009383750.2	uncharacterized LOC103970106 (LOC103970106), transcript variant X1, mRNA	1981	50.63	553	1e-141	488		NM_001350807.1	NM_001350807.1 length 1954 aa, 5865 bp, from 105..5969 of NM_001350807.1 Zea mays uncharacterized LOC100279122 (LOC100279122), mRNA	1954	42.04	559	5e-112	397		XM_010314725.2	uncharacterized LOC101245721 (LOC101245721), transcript variant X5, mRNA	1670	48.31	561	7e-130	449		XM_010648900.2	uncharacterized LOC100264071 (LOC100264071), transcript variant X2, mRNA	1803	58.98	551	0	603		XM_020570490.1	uncharacterized LOC18766158 (LOC18766158), transcript variant X1, mRNA	1968	55.94	556	1e-166	560
	UN000109	XM_011629135.2	uncharacterized LOC18445287 (LOC18445287), transcript variant X4, mRNA	1728	44.05	756	5e-124	430		XM_009393305.2	uncharacterized LOC103977716 (LOC103977716), transcript variant X1, mRNA	1767	40.22	736	5e-82	300		XM_008655225.2	uncharacterized LOC103633544 (LOC103633544), transcript variant X1, mRNA	1669	44.79	326	6e-63	239		XM_004247495.3	uncharacterized LOC101260375 (LOC101260375), transcript variant X4, mRNA	1681	45.43	361	9e-70	260		XM_010653750.2	uncharacterized LOC100254466 (LOC100254466), mRNA	1743	45.42	742	1e-124	432		XM_020569630.1	uncharacterized LOC18767729 (LOC18767729), mRNA	1692	42.76	732	1e-109	386
	UN000111	XM_006841081.3	uncharacterized LOC18430941 (LOC18430941), mRNA	1705	55.12	1085	0	979		XM_009388114.2	uncharacterized LOC103973523 (LOC103973523), transcript variant X1, mRNA	1646	60.08	1032	0	1076		XM_008670101.2	Ubiquitin carboxyl-terminal hydrolase-related protein (LOC100274180), transcript variant X1, mRNA	1538	43.58	1051	0	680		XM_004241513.3	uncharacterized LOC101248307 (LOC101248307), mRNA	1639	54.46	1065	0	971		XM_019226461.1	uncharacterized LOC100256959 (LOC100256959), transcript variant X4, mRNA	1599	60.08	1047	0	1080		XM_020563611.1	uncharacterized LOC18775704 (LOC18775704), transcript variant X1, mRNA	1655	60.84	1047	0	1085
	UN000112	XM_020666979.1	transcription factor BIM2 (LOC18433937), transcript variant X2, mRNA	595	49.16	592	1e-147	437		XM_018831259.1	transcription factor BIM1-like (LOC103998317), transcript variant X2, mRNA	529	41.53	549	2e-97	306		XM_020540289.1	putative HLH DNA-binding domain superfamily protein (LOC100191909), transcript variant X5, mRNA	501	38.91	514	1e-87	280		XM_010320586.2	transcription factor BIM1 (LOC101263596), transcript variant X2, mRNA	567	44.7	575	7e-131	393		XM_019226602.1	transcription factor BIM1 (LOC100243993), mRNA	589	56.1	574	0	531		XM_020564411.1	transcription factor BIM1 (LOC18777940), transcript variant X2, mRNA	575	53.46	593	8e-170	493
	UN000113	XM_006842592.3	protein MOR1 (LOC18432490), transcript variant X1, mRNA	2014	75.68	2023	0	2805		XM_009389100.2	protein MOR1-like (LOC103974309), transcript variant X1, mRNA	2019	77.98	2012	0	2944		XM_020549973.1	uncharacterized LOC100501495 (LOC100501495), transcript variant X2, mRNA	1995	73.54	2014	0	2768		XM_004232786.3	protein MOR1 (LOC101263666), transcript variant X1, mRNA	2023	75.12	2018	0	2859		XM_019218608.1	protein MOR1 (LOC100258505), transcript variant X3, mRNA	2031	79.35	2019	0	3025		XM_020564716.1	protein MOR1 (LOC18788242), transcript variant X1, mRNA	2015	75.88	2019	0	2877
	UN000114	XM_006855571.3	callose synthase 3 (LOC18445433), mRNA	1941	77.46	1952	0	2963		XM_009402983.2	callose synthase 3-like (LOC103985320), mRNA	2005	80.26	1955	0	3074		NM_001279538.1	NM_001279538.1 length 1958 aa, 5877 bp, from 130..6006 of NM_001279538.1 Zea mays callose synthase (Tie-dyed2), mRNA	1958	77.08	1946	0	2940		XM_004228545.3	callose synthase 3-like (LOC101263837), mRNA	1951	81.05	1953	0	3118		XM_002283262.4	callose synthase 3 (LOC100265625), mRNA	1948	83.44	1956	0	3214		XM_020565397.1	callose synthase 3 (LOC18775196), transcript variant X1, mRNA	1957	82.24	1959	0	3185
	UN000115	XM_011622801.2	uncharacterized LOC18428017 (LOC18428017), transcript variant X1, mRNA	2012	37.4	1936	0	862		XM_009404753.2	uncharacterized LOC103986677 (LOC103986677), transcript variant X1, mRNA	1736	38.05	657	3e-102	364		XM_020545565.1	hypothetical protein (LOC103632668), transcript variant X3, mRNA	1546	36.4	662	2e-84	307		XM_004252399.3	uncharacterized LOC101247194 (LOC101247194), transcript variant X1, mRNA	1791	35.73	641	1e-94	340		XM_010664960.2	uncharacterized LOC100265641 (LOC100265641), transcript variant X6, mRNA	1880	42.79	1837	0	1080		XM_020563534.1	uncharacterized LOC18777358 (LOC18777358), transcript variant X8, mRNA	1852	38.22	1847	0	893
	UN000116	XM_011622801.2	uncharacterized LOC18428017 (LOC18428017), transcript variant X1, mRNA	2012	36.79	1930	0	847		XM_018830473.1	uncharacterized LOC103996049 (LOC103996049), transcript variant X3, mRNA	1648	35.98	767	7e-101	360		XM_008660584.2	uncharacterized LOC100381929 (LOC100381929), transcript variant X1, mRNA	1553	33.15	896	9e-89	321		XM_004236449.3	uncharacterized LOC101267696 (LOC101267696), transcript variant X1, mRNA	1774	30.91	1802	2e-148	502		XM_010662326.2	uncharacterized LOC100260052 (LOC100260052), transcript variant X2, mRNA	1841	41.17	1829	0	1073		XM_020563534.1	uncharacterized LOC18777358 (LOC18777358), transcript variant X8, mRNA	1852	37.01	1851	0	833
	UN000119	XM_020661867.1	autophagy-related protein 2 (LOC18425094), transcript variant X2, mRNA	1981	51.96	1047	0	863		XM_009422278.2	autophagy-related protein 2 (LOC104000274), transcript variant X1, mRNA	1989	50.71	1061	0	832		XM_008651075.2	autophagy-related protein 2 (LOC103629977), transcript variant X1, mRNA	1957	45.58	1053	0	755		XM_010316931.2	autophagy-related protein 2 (LOC101260283), transcript variant X1, mRNA	1982	50.67	1046	0	839		XM_019218983.1	autophagy-related protein 2 (LOC100257340), transcript variant X7, mRNA	2020	57.64	1053	0	1014		XM_007199610.2	autophagy-related protein 2 (LOC18767330), mRNA	2016	55.99	1043	0	969
	UN000121	XM_011629432.2	uncharacterized LOC18446016 (LOC18446016), transcript variant X3, mRNA	3080	52.37	2196	0	2131		---	---	0	---	---	---	---		XM_020546518.1	hypothetical protein (LOC103640525), transcript variant X3, mRNA	2273	47.03	2069	0	1748		XM_010317866.2	uncharacterized LOC101257436 (LOC101257436), transcript variant X2, mRNA	3183	49.04	2194	0	1932		XM_010654333.2	uncharacterized LOC100258552 (LOC100258552), transcript variant X1, mRNA	3228	57.38	2187	0	2433		XM_020568439.1	uncharacterized LOC18770940 (LOC18770940), transcript variant X2, mRNA	3101	54.39	2177	0	2258
	UN000122	XM_006858263.3	phosphatidylinositol 4-kinase alpha 1 (LOC18448187), mRNA	2055	68.06	72	3e-18	92.4		XM_009410018.2	phosphatidylinositol 4-kinase alpha 1 (LOC103990760), mRNA	2025	59.09	66	9e-14	78.2		---	---	0	---	---	---	---		XM_004250677.3	phosphatidylinositol 4-kinase alpha 1 (LOC101244832), mRNA	1957	65.15	66	6e-18	91.7		XM_003631584.3	phosphatidylinositol 4-kinase alpha 1 (LOC100852729), transcript variant X2, mRNA	2039	67.69	65	3e-19	95.9		XM_007200887.2	phosphatidylinositol 4-kinase alpha 1 (LOC18766902), mRNA	2031	58.21	67	3e-16	85.9
	UN000124	XM_011622801.2	uncharacterized LOC18428017 (LOC18428017), transcript variant X1, mRNA	2012	37.96	2010	0	900		XM_009404753.2	uncharacterized LOC103986677 (LOC103986677), transcript variant X1, mRNA	1736	38.05	657	2e-102	365		XM_020545565.1	hypothetical protein (LOC103632668), transcript variant X3, mRNA	1546	36.4	662	2e-84	308		XM_004252399.3	uncharacterized LOC101247194 (LOC101247194), transcript variant X1, mRNA	1791	35.61	643	7e-95	342		XM_010664960.2	uncharacterized LOC100265641 (LOC100265641), transcript variant X6, mRNA	1880	41.56	1932	0	1115		XM_020563534.1	uncharacterized LOC18777358 (LOC18777358), transcript variant X8, mRNA	1852	38.43	1941	0	957
	UN000125	XM_020661934.1	nuclear pore complex protein NUP214 (LOC18425186), transcript variant X4, mRNA	1757	51.62	432	1e-128	408		XM_018826272.1	nuclear pore complex protein NUP214 (LOC103984394), mRNA	1784	56.82	440	3e-151	470		XM_020540420.1	Nuclear pore complex protein NUP214 (LOC100276843), transcript variant X3, mRNA	1736	46.47	439	3e-108	351		XM_010317471.2	nuclear pore complex protein NUP214 (LOC101268441), mRNA	1610	50.12	431	7e-113	363		XM_010653108.2	nuclear pore complex protein NUP214 (LOC100245011), mRNA	1756	59.06	425	5e-144	450		XM_020565535.1	nuclear pore complex protein NUP214 (LOC18772688), transcript variant X1, mRNA	1785	54.22	415	2e-128	407
	UN000127	XM_006857546.3	proteasome activator subunit 4 (LOC18447449), transcript variant X1, mRNA	1828	67.86	1820	0	2400		XM_009384928.2	proteasome activator subunit 4 (LOC103971009), transcript variant X2, mRNA	1815	68.44	1822	0	2519		XM_008649897.2	uncharacterized LOC100383447 (LOC100383447), transcript variant X2, mRNA	1806	62.48	1823	0	2267		XM_010325927.2	proteasome activator subunit 4 (LOC101266536), mRNA	1813	67.62	1819	0	2477		XM_010646342.2	proteasome activator subunit 4 (LOC100263530), mRNA	1808	74.57	1821	0	2740		XM_020566477.1	proteasome activator subunit 4 (LOC18772801), mRNA	1815	72	1818	0	2609
	UN000128	XM_020672342.1	uncharacterized LOC18442513 (LOC18442513), transcript variant X2, mRNA	2142	40.02	2154	0	1248		XM_009411593.2	uncharacterized LOC103992033 (LOC103992033), transcript variant X1, mRNA	2162	37.66	2159	0	1107		XM_008669325.2	Histone-lysine N-methyltransferase ATX4 (pco061382), transcript variant X1, mRNA	1920	41.88	905	3e-177	593		XM_010328625.2	trithorax (LOC100736465), transcript variant X6, mRNA	1300	31.73	394	8e-43	172		XM_010650413.2	uncharacterized LOC100255892 (LOC100255892), transcript variant X1, mRNA	2181	45.21	2172	0	1559		XM_020569055.1	uncharacterized LOC18791475 (LOC18791475), transcript variant X2, mRNA	2124	38.05	2168	0	1135
	UN000129	XM_006838440.3	nucleolin (LOC18429148), mRNA	805	70.56	574	0	682		XM_009390826.2	nucleolin (LOC103975755), transcript variant X1, mRNA	786	66.97	557	0	665		XM_020544905.1	uncharacterized LOC100216781 (LOC100216781), transcript variant X1, mRNA	799	78.73	268	2e-149	449		XM_004248939.3	nucleolin (LOC101258799), transcript variant X5, mRNA	767	65.55	566	0	650		XM_002270304.4	nucleolin (LOC100232913), transcript variant X1, mRNA	850	71.02	566	0	691		XM_007220561.2	uncharacterized RNA-binding protein C660.15 (LOC18786415), mRNA	809	69.6	569	0	679
	UN000133	XM_020663482.1	DExH-box ATP-dependent RNA helicase DExH14 (LOC18428042), mRNA	1998	77.99	1917	0	3037		XM_009416850.1	DExH-box ATP-dependent RNA helicase DExH14 (LOC103996050), mRNA	2083	78.8	2085	0	3404		XM_008662184.2	DExH-box ATP-dependent RNA helicase DExH14 (LOC103639442), mRNA	2128	73.9	2088	0	3185		XM_004241556.2	DExH-box ATP-dependent RNA helicase DExH14 (LOC101260947), mRNA	2088	76.99	2086	0	3313		XM_002284093.3	DExH-box ATP-dependent RNA helicase DExH14 (LOC100251846), transcript variant X1, mRNA	2093	79.13	2089	0	3408		XM_020561789.1	DExH-box ATP-dependent RNA helicase DExH14 (LOC18781386), transcript variant X1, mRNA	2089	78.88	2088	0	3380
	UN000134	XM_020663123.1	brefeldin A-inhibited guanine nucleotide-exchange protein 5 (LOC18427439), transcript variant X1, mRNA	1829	75.71	1832	0	2740		XM_009390579.2	brefeldin A-inhibited guanine nucleotide-exchange protein 5-like (LOC103975570), transcript variant X2, mRNA	1789	74.46	1809	0	2624		NM_001329534.1	NM_001329534.1 length 1724 aa, 5175 bp, from 127..5301 of NM_001329534.1 Zea mays uncharacterized LOC100501049 (LOC100501049), mRNA	1724	72.39	1804	0	2548		XM_004252107.3	brefeldin A-inhibited guanine nucleotide-exchange protein 5 (LOC101256162), transcript variant X1, mRNA	1770	67.76	1821	0	2385		XM_010657761.2	brefeldin A-inhibited guanine nucleotide-exchange protein 5 (LOC100249070), mRNA	1797	77.19	1815	0	2772		XM_007202998.2	brefeldin A-inhibited guanine nucleotide-exchange protein 5 (LOC18769617), mRNA	1772	73.83	1811	0	2672
	UN000137	XM_020676180.1	RNA polymerase II transcription subunit 13 (LOC18448492), transcript variant X1, mRNA	1989	56.6	2037	0	1947		XM_018829064.1	mediator of RNA polymerase II transcription subunit 13 (LOC103991848), transcript variant X1, mRNA	1978	58.48	2004	0	2017		NM_001152933.1	NM_001152933.1 length 272 aa, 819 bp, from 807..1625 of NM_001152933.1 Zea mays uncharacterized LOC100279985 (LOC100279985), mRNA	272	42.06	252	3e-55	194		XM_010321357.2	mediator of RNA polymerase II transcription subunit 13 (LOC101261015), transcript variant X1, mRNA	2004	59.17	2011	0	2002		XM_010653082.2	mediator of RNA polymerase II transcription subunit 13 (LOC100263945), mRNA	1996	64.08	2013	0	2221		XM_020567032.1	mediator of RNA polymerase II transcription subunit 13 (LOC18774690), transcript variant X2, mRNA	1961	60.49	2007	0	2079
	UN000138	XM_011627936.2	coiled-coil domain-containing protein 18 (LOC18442002), transcript variant X3, mRNA	1685	40.08	786	6e-135	462		XM_009394346.1	CAP-Gly domain-containing linker protein 1 (LOC103978521), mRNA	1739	42.15	828	6e-173	572		XM_008647671.2	myosin-9 (LOC103627381), mRNA	1776	33.37	818	1e-116	410		XM_004239447.2	CAP-Gly domain-containing linker protein 1 (LOC101252084), transcript variant X2, mRNA	1863	37.48	1761	0	835		XM_010656680.2	myosin-11 (LOC100257864), transcript variant X1, mRNA	1864	45.35	904	0	658		XM_020554822.1	myosin heavy chain, striated muscle (LOC18792354), mRNA	1824	39.63	1779	0	974
	UN000140	XM_011623877.2	putative 1-phosphatidylinositol-3-phosphate 5-kinase FAB1C (LOC18431076), mRNA	1778	57.33	1017	0	1058		XM_009411798.2	putative 1-phosphatidylinositol-3-phosphate 5-kinase FAB1C (LOC103992188), mRNA	1761	55.32	987	0	975		XM_008654468.2	putative 1-phosphatidylinositol-3-phosphate 5-kinase FAB1C (LOC103632727), mRNA	1628	52.05	1001	0	958		XM_010322408.2	putative 1-phosphatidylinositol-3-phosphate 5-kinase FAB1C (LOC101255884), mRNA	1738	55.51	1052	0	1022		XM_010657777.2	1-phosphatidylinositol-3-phosphate 5-kinase FAB1B (LOC100267980), transcript variant X3, mRNA	1845	48.43	1016	0	816		XM_020555626.1	putative 1-phosphatidylinositol-3-phosphate 5-kinase FAB1C (LOC18793898), mRNA	1768	60	1015	0	1122
	UN000141	XM_006842221.3	histone acetyltransferase HAC1 (LOC18432109), mRNA	1763	64.27	1780	0	1998		XM_009408981.2	probable histone acetyltransferase HAC-like 1 (LOC103989995), transcript variant X1, mRNA	1740	58.74	1784	0	1812		XM_008683280.2	Histone acetyltransferase HAC1 (LOC100273924), transcript variant X1, mRNA	1720	53.68	1805	0	1623		XM_010316987.2	histone acetyltransferase HAC1-like (LOC101246749), transcript variant X2, mRNA	1693	70.51	1153	0	1624		XM_010656911.2	histone acetyltransferase HAC1 (LOC100251243), mRNA	1750	66.72	1779	0	2103		XM_020560266.1	histone acetyltransferase HAC1 (LOC18782131), transcript variant X1, mRNA	1739	62.65	1778	0	1934
	UN000142	XM_011623508.1	uncharacterized LOC105420314 (LOC105420314), partial mRNA	429	70.8	226	4e-116	344		XM_009415248.1	uncharacterized LOC103994812 (LOC103994812), mRNA	1782	27.16	243	5e-21	95.9		XM_020550882.1	uncharacterized LOC109945085 (LOC109945085), partial mRNA	1221	48.58	212	3e-50	182		XM_010317443.1	uncharacterized LOC101248530 (LOC101248530), mRNA	1257	33.06	369	4e-49	178		XM_019218870.1	uncharacterized LOC109122323 (LOC109122323), mRNA	1250	64.84	384	0	558		XM_020553910.1	uncharacterized LOC109946372 (LOC109946372), mRNA	1823	72.82	390	0	614
	UN000143	XM_020664829.1	kinesin-like protein KIN-12E (LOC18430054), transcript variant X3, mRNA	2170	41.45	1240	0	667		XM_009422437.2	kinesin-like protein KIN-12F (LOC104000407), mRNA	2938	41.96	560	6e-91	324		XM_008655172.2	kinesin-like protein KIN-12E (LOC103633476), mRNA	1921	43.69	586	2e-100	353		XM_004229071.3	kinesin-like protein KIN-12C (LOC101249485), transcript variant X1, mRNA	2206	54.61	575	1e-142	478		XM_010651368.2	kinesin-like protein KIN-12C (LOC100245872), transcript variant X3, mRNA	2328	66.78	569	0	635		XM_020566618.1	kinesin-like protein KIN-12C (LOC18791751), transcript variant X1, mRNA	2323	63.07	574	0	601
	UN000146	XM_006846931.3	DDB1- and CUL4-associated factor homolog 1 (LOC18436708), mRNA	1863	66.31	1496	0	1551		XM_009412392.2	DDB1- and CUL4-associated factor homolog 1 (LOC103992611), mRNA	1991	64.72	1811	0	1799		XM_020545213.1	DDB1- and CUL4-associated factor homolog 1 (LOC100502197), transcript variant X1, mRNA	1925	54.62	1798	0	1449		XM_010327357.2	DDB1- and CUL4-associated factor homolog 1 (LOC101254121), mRNA	1970	64.12	1809	0	1811		XM_010650165.2	DDB1- and CUL4-associated factor homolog 1 (LOC100254299), mRNA	1967	68.89	1803	0	2029		XM_007226264.2	DDB1- and CUL4-associated factor homolog 1 (LOC18791508), mRNA	1928	65.43	1805	0	1838
	UN000147	XM_011631105.2	THO complex subunit 2 (LOC18421718), transcript variant X3, mRNA	1854	70.71	1895	0	2417		XM_009384712.2	THO complex subunit 2 (LOC103970792), mRNA	1805	66.01	1892	0	2214		XM_020550513.1	THO complex subunit 2 (LOC103652539), transcript variant X1, mRNA	1815	58.86	1891	0	1918		XM_004239212.3	THO complex subunit 2 (LOC101261518), mRNA	1865	65.83	1902	0	2221		XM_010651016.2	THO complex subunit 2 (LOC100254201), transcript variant X4, mRNA	1889	72.46	1899	0	2504		XM_020559044.1	THO complex subunit 2 (LOC18782887), transcript variant X1, mRNA	1874	69.27	1897	0	2362
	UN000148	XM_006838808.3	RNA polymerase II transcription subunit 14 (LOC18429522), transcript variant X2, mRNA	1856	61.55	1862	0	2012		XM_009403156.2	mediator of RNA polymerase II transcription subunit 14-like (LOC103985457), mRNA	1815	64.05	1833	0	2102		XM_020547649.1	Mediator of RNA polymerase II transcription subunit 14 (LOC100279374), transcript variant X1, mRNA	1767	56.96	1840	0	1791		XM_010329370.2	mediator of RNA polymerase II transcription subunit 14 (LOC101261458), transcript variant X1, mRNA	1791	64.66	1831	0	2064		XM_010661571.2	mediator of RNA polymerase II transcription subunit 14 (LOC100267561), mRNA	1830	71.29	1825	0	2306		XM_020567128.1	mediator of RNA polymerase II transcription subunit 14 (LOC18775199), mRNA	1826	67.58	1826	0	2177
	UN000151	XM_020661552.1	serine/threonine-protein kinase ATR (LOC18424206), transcript variant X2, mRNA	2646	73.42	2062	0	2954		XM_018828707.1	serine/threonine-protein kinase ATR (LOC103998689), transcript variant X4, mRNA	2355	72	2075	0	2956		XM_020538397.1	serine/threonine-protein kinase ATR (LOC103626462), transcript variant X3, mRNA	2705	67.28	2063	0	2760		XM_019211944.1	serine/threonine-protein kinase ATR (LOC101256634), transcript variant X3, mRNA	2507	70.95	2069	0	2945		XM_019218945.1	serine/threonine-protein kinase ATR (LOC100245131), transcript variant X6, mRNA	2490	76.44	2067	0	3140		XM_007200050.2	serine/threonine-protein kinase ATR (LOC18767854), transcript variant X2, mRNA	2731	73.68	2071	0	3079
	UN000152	XM_020676437.1	rRNA biogenesis protein RRP5 (LOC18448878), mRNA	1948	57.8	1007	0	1083		XM_009409501.2	rRNA biogenesis protein RRP5 (LOC103990387), mRNA	1948	59.96	994	0	1107		XM_008653947.2	rRNA biogenesis protein RRP5 (LOC103632096), transcript variant X2, mRNA	1923	54.82	985	0	966		XM_010319556.2	rRNA biogenesis protein RRP5 (LOC101261692), mRNA	1897	60	1005	0	1098		XM_010655552.2	rRNA biogenesis protein RRP5 (LOC100262322), mRNA	1919	64.84	1004	0	1179		XM_020568221.1	rRNA biogenesis protein RRP5 (LOC18769940), transcript variant X2, mRNA	1953	62.14	980	0	1117
	UN000153	---	---	0	---	---	---	---		XM_009387484.2	NADH-ubiquinone oxidoreductase chain 2 (LOC103973027), mRNA	249	28.63	227	4e-14	73.6		XM_020541156.1	NAD(P)H-quinone oxidoreductase subunit 5, chloroplastic-like (LOC109940833), mRNA	492	85.53	456	0	778		---	---	0	---	---	---	---		XM_010648825.2	NADH-ubiquinone oxidoreductase chain 2 (LOC104878429), mRNA	250	30.65	186	2e-12	68.6		---	---	0	---	---	---	---
	UN000154	XM_006828106.3	protein SCAR2 (LOC18423505), transcript variant X1, mRNA	1639	56.73	275	1e-96	313		XM_009402688.2	SCAR-like protein 1 (LOC103985074), mRNA	1680	53.66	328	4e-98	318		XM_008674158.2	uncharacterized LOC100279190 (LOC100279190), transcript variant X3, mRNA	2091	74.85	171	3e-85	281		XM_010327477.2	protein SCAR2 (LOC101259665), transcript variant X2, mRNA	1707	56.78	317	6e-109	348		XM_010655071.2	protein SCAR2 (LOC100251663), mRNA	1687	54.47	347	3e-110	352		XM_020565517.1	protein SCAR2 (LOC18773969), transcript variant X3, mRNA	1601	59.29	312	8e-108	345
	UN000155	XM_020661947.1	guanine nucleotide exchange factor SPIKE 1 (LOC18425142), transcript variant X2, mRNA	1854	84.41	1847	0	3160		XM_018819258.1	guanine nucleotide exchange factor SPIKE 1 (LOC104000213), mRNA	1063	89.72	1060	0	1897		XM_020547997.1	Guanine nucleotide exchange factor SPIKE 1 (IDP1653), transcript variant X2, mRNA	1887	80.39	1841	0	2992		XM_010326433.2	guanine nucleotide exchange factor SPIKE 1 (LOC101262837), mRNA	1870	81	1842	0	2965		XM_010657757.2	guanine nucleotide exchange factor SPIKE 1 (LOC100259293), transcript variant X1, mRNA	1847	84.88	1845	0	3125		XM_007214737.2	guanine nucleotide exchange factor SPIKE 1 (LOC18780441), mRNA	1876	82.64	1814	0	2994
	UN000156	XM_020671012.1	ABC transporter A family member 1 (LOC18440333), transcript variant X1, mRNA	1946	71.38	1918	0	2694		XM_009388696.2	ABC transporter A family member 1 (LOC103973989), mRNA	1916	71.75	1894	0	2728		XM_008680325.2	ABC transporter A family member 7-like (LOC103653413), mRNA	991	32.8	628	4e-80	288		XM_004236556.3	ABC transporter A family member 1 (LOC101266927), transcript variant X1, mRNA	1903	70.84	1900	0	2653		XM_002284168.3	ABC transporter A family member 1 (LOC100265905), transcript variant X1, mRNA	1916	75.83	1895	0	2791		XM_007202995.2	ABC transporter A family member 1 (LOC18771352), mRNA	1904	75.07	1897	0	2845
	UN000157	XM_006851749.3	brefeldin A-inhibited guanine nucleotide-exchange protein 2 (LOC18441512), mRNA	1791	74.39	82	1e-30	132		XM_009415500.2	brefeldin A-inhibited guanine nucleotide-exchange protein 2-like (LOC103995014), mRNA	1779	77.5	80	2e-31	135		NM_001254773.1	NM_001254773.1 length 1795 aa, 5388 bp, from 1..5388 of NM_001254773.1 Zea mays guanine-nucleotide-exchange protein (LOC100857099), mRNA	1795	80	80	1e-31	137		XM_004229773.3	brefeldin A-inhibited guanine nucleotide-exchange protein 2-like (LOC101254941), mRNA	1778	75.95	79	4e-31	134		XM_002279660.3	brefeldin A-inhibited guanine nucleotide-exchange protein 2 (LOC100250634), mRNA	1779	74.39	82	1e-31	136		XM_007220515.2	brefeldin A-inhibited guanine nucleotide-exchange protein 2 (LOC18786921), mRNA	1775	77.5	80	1e-32	139
	UN000158	XM_020669161.1	uncharacterized LOC18437469 (LOC18437469), transcript variant X4, mRNA	1520	35.04	879	5e-119	404		XM_009394504.2	uncharacterized LOC103978646 (LOC103978646), transcript variant X7, mRNA	1592	35.46	846	1e-112	387		XM_008650522.2	RING/FYVE/PHD zinc finger superfamily protein (LOC103629382), transcript variant X3, mRNA	1164	33.29	748	1e-85	304		XM_010319991.2	uncharacterized LOC101244850 (LOC101244850), transcript variant X3, mRNA	1498	35.29	768	3e-102	355		XM_002270271.4	uncharacterized LOC100261463 (LOC100261463), transcript variant X4, mRNA	1581	35.2	1318	3e-170	546		XM_020556160.1	uncharacterized LOC18787726 (LOC18787726), transcript variant X3, mRNA	1566	35.89	783	1e-107	372
	UN000159	XM_020674320.1	callose synthase 9 (LOC18445426), transcript variant X1, mRNA	1911	77.95	1882	0	3012		XM_009402047.2	callose synthase 9 (LOC103984533), mRNA	1940	76.78	1882	0	2981		XM_020544934.1	callose synthase 9 (LOC103644387), mRNA	1907	72.07	1887	0	2742		XM_010317693.2	callose synthase 9 (LOC101263540), mRNA	1912	78.03	1889	0	3058		XM_010653030.2	callose synthase 9 (LOC100232893), transcript variant X3, mRNA	1923	80.17	1886	0	3112		XM_020567479.1	callose synthase 9 (LOC18773766), transcript variant X2, mRNA	1929	79.36	1885	0	3067
	UN000160	XM_020666706.1	uncharacterized LOC18433688 (LOC18433688), transcript variant X1, mRNA	1868	46.9	1906	0	1348		XM_018828488.1	uncharacterized LOC103992335 (LOC103992335), transcript variant X2, mRNA	1456	55.78	640	0	680		XM_008654538.2	uncharacterized LOC103632806 (LOC103632806), transcript variant X1, mRNA	1737	54.45	584	0	609		XM_010325677.2	uncharacterized LOC101258082 (LOC101258082), mRNA	1764	45.78	1826	0	1256		XM_010657783.2	uncharacterized LOC100249222 (LOC100249222), transcript variant X1, mRNA	1795	49.78	1838	0	1419		XM_020568006.1	uncharacterized LOC18771500 (LOC18771500), transcript variant X1, mRNA	1749	46.6	1839	0	1310
	UN000161	XM_020664060.1	protein TIME FOR COFFEE (LOC18428903), transcript variant X4, mRNA	1590	40.69	462	9e-58	220		XM_018825155.1	protein TIME FOR COFFEE-like (LOC103983132), transcript variant X3, mRNA	1549	36.67	938	6e-79	288		NM_001323959.1	NM_001323959.1 length 1589 aa, 4770 bp, from 290..5059 of NM_001323959.1 Zea mays uncharacterized LOC100502414 (LOC100502414), mRNA	1589	39.37	315	9e-34	143		XM_010328254.2	protein TIME FOR COFFEE (LOC101257597), transcript variant X2, mRNA	1685	43.81	194	6e-27	120		XM_002272696.4	protein TIME FOR COFFEE (LOC100252941), transcript variant X1, mRNA	1318	38.52	1285	1e-121	412		XM_007225415.2	protein TIME FOR COFFEE (LOC18791247), transcript variant X2, mRNA	1621	42.48	765	5e-92	328
	UN000162	XM_011631081.2	protein STICHEL-like 4 (LOC18425628), transcript variant X1, mRNA	1185	46.2	158	1e-21	102		XM_009408499.2	protein STICHEL-like 3 (LOC103989607), mRNA	1194	57.49	167	1e-39	160		XM_020542664.1	protein STICHEL-like 4 (LOC103636253), transcript variant X1, mRNA	1062	50.77	65	8e-08	57.8		XM_010318546.2	protein STICHEL-like 3 (LOC101268831), mRNA	1213	60.29	136	2e-37	154		XM_010657243.2	protein STICHEL-like 3 (LOC100249702), transcript variant X1, mRNA	1229	57.44	195	3e-52	201		XM_020562608.1	protein STICHEL-like 3 (LOC18778810), transcript variant X1, mRNA	1191	55.74	183	4e-48	187
	UN000164	XM_006843352.3	DDT domain-containing protein PTM (LOC18433258), mRNA	1711	61.4	57	3e-18	76.6		---	---	0	---	---	---	---		XM_008655217.2	DNA binding (LOC103633535), mRNA	1729	56.86	51	2e-16	71.6		XM_004251325.3	DDT domain-containing protein PTM (LOC101266795), transcript variant X1, mRNA	1737	50.98	51	2e-09	51.6		XM_010653184.2	DDT domain-containing protein PTM (LOC100260139), mRNA	1884	59.26	54	9e-17	72.4		XM_020561470.1	DDT domain-containing protein PTM (LOC18781272), transcript variant X1, mRNA	1666	54.72	53	7e-14	63.9
	UN000165	XM_020671328.1	uncharacterized ATP-dependent helicase C29A10.10c (LOC18440734), transcript variant X2, mRNA	1932	53.61	1233	0	1165		XM_018819214.1	uncharacterized LOC103969698 (LOC103969698), transcript variant X2, mRNA	2087	62.99	943	0	1193		XM_020541013.1	helicase SEN1 (LOC103632948), transcript variant X2, mRNA	2092	56.68	965	0	1068		XM_010320122.2	uncharacterized LOC101249343 (LOC101249343), transcript variant X2, mRNA	2341	60	995	0	1145		XM_010656979.2	uncharacterized LOC100265030 (LOC100265030), transcript variant X1, mRNA	2421	57.27	1224	0	1278		XM_020559743.1	helicase SEN1 (LOC18782252), transcript variant X3, mRNA	1909	55.64	1224	0	1232
	UN000166	XM_006851697.3	DDT domain-containing protein PTM (LOC18441467), mRNA	1826	38.42	1572	0	885		XM_018823771.1	DDT domain-containing protein PTM-like (LOC103979415), transcript variant X1, mRNA	1733	42.42	1636	0	1083		XM_008671643.2	DDT domain-containing protein PTM-like (LOC103647086), mRNA	1900	36.23	1659	0	835		XM_004251325.3	DDT domain-containing protein PTM (LOC101266795), transcript variant X1, mRNA	1737	41.66	1049	0	685		XM_010653435.2	DDT domain-containing protein PTM (LOC100243147), transcript variant X1, mRNA	1692	48.19	1598	0	1264		XM_007208324.2	DDT domain-containing protein PTM (LOC18774065), mRNA	1698	43.99	1605	0	1179
	UN000167	XM_020663504.1	nipped-B-like protein (LOC18427942), transcript variant X1, mRNA	1782	64.72	1590	0	1961		XM_009400861.2	nipped-B-like protein A (LOC103983615), transcript variant X2, mRNA	1598	67.8	1612	0	2058		XM_020548745.1	nipped-B-like protein (LOC103648287), transcript variant X2, mRNA	1654	58.04	1630	0	1743		XM_010319588.2	nipped-B-like protein B (LOC101259220), mRNA	1782	64.64	1598	0	1916		XM_010662835.2	nipped-B-like protein (LOC100249183), transcript variant X1, mRNA	1792	72.08	1612	0	2237		XM_020559692.1	nipped-B-like protein B (LOC18784479), transcript variant X2, mRNA	1621	68.55	1625	0	2128
	UN000168	XM_011622412.2	splicing factor 3B subunit 1 (LOC18427098), transcript variant X1, mRNA	1269	89.25	1274	0	2146		XM_009421713.2	splicing factor 3B subunit 1 (LOC103999839), transcript variant X1, mRNA	1269	90.98	1275	0	2169		NM_001327758.1	NM_001327758.1 length 1280 aa, 3843 bp, from 32..3874 of NM_001327758.1 Zea mays antigenic determinant of rec-A protein, mRNA (LOC100277544), mRNA	1280	86.16	1286	0	2009		XM_004249288.3	splicing factor 3B subunit 1 (LOC101252641), mRNA	1265	89.06	1270	0	2123		XM_010655379.2	splicing factor 3B subunit 1 (LOC100243186), transcript variant X1, mRNA	1271	91.28	1273	0	2167		XM_007201704.2	splicing factor 3B subunit 1 (LOC18767238), mRNA	1278	88.28	1271	0	2107
	UN000169	XM_020665824.1	transcription initiation factor TFIID subunit 1 (LOC18431981), transcript variant X2, mRNA	2074	54.52	2091	0	1837		XM_009390864.2	transcription initiation factor TFIID subunit 1 (LOC103975786), mRNA	1852	58.65	1930	0	1871		XM_008661557.2	transcription initiation factor TFIID subunit 1 (LOC103638720), mRNA	1805	50.61	1814	0	1451		XM_010324943.2	transcription initiation factor TFIID subunit 1 (LOC101245072), transcript variant X3, mRNA	1855	56.13	1933	0	1748		XM_010658660.2	transcription initiation factor TFIID subunit 1 (LOC100254115), transcript variant X1, mRNA	1946	61.89	1994	0	2071		XM_020555092.1	transcription initiation factor TFIID subunit 1 (LOC18792393), transcript variant X1, mRNA	1908	57.27	1973	0	1840
	UN000170	XM_020672177.1	uncharacterized LOC18442278 (LOC18442278), transcript variant X1, mRNA	1941	59.13	1172	0	1323		XM_009404377.2	uncharacterized LOC103986378 (LOC103986378), mRNA	1850	55.4	1536	0	1462		XM_020550519.1	uncharacterized LOC103652548 (LOC103652548), mRNA	1823	57.7	1123	0	1202		XM_010326077.2	uncharacterized LOC101247940 (LOC101247940), mRNA	1837	60.17	1145	0	1299		XM_010645864.2	uncharacterized LOC100243511 (LOC100243511), mRNA	1971	49.69	1966	0	1604		XM_007214652.2	uncharacterized LOC18779147 (LOC18779147), mRNA	1851	53.46	1588	0	1456
	UN000172	XM_020673358.1	uncharacterized LOC18443902 (LOC18443902), transcript variant X4, mRNA	2526	49.84	313	2e-73	273		XM_009384338.2	uncharacterized LOC103970535 (LOC103970535), transcript variant X1, mRNA	2747	51.47	307	6e-72	269		XM_008667397.2	Histidine kinase- DNA gyrase B- and HSP90-like ATPase family protein (LOC103644200), mRNA	2826	40.26	303	2e-56	219		XM_010328544.1	uncharacterized LOC101247370 (LOC101247370), mRNA	2723	42.3	305	2e-56	218		XM_010651986.2	uncharacterized LOC100258878 (LOC100258878), mRNA	2766	52.6	308	1e-83	307		XM_020569173.1	uncharacterized LOC18793225 (LOC18793225), transcript variant X1, mRNA	2741	45.34	311	1e-68	258
	UN000173	XM_020668546.1	endoribonuclease Dicer homolog 1 (LOC18436338), transcript variant X1, mRNA	2044	82.48	1712	0	2882		XM_009413140.2	endoribonuclease Dicer homolog 1 (LOC103993174), transcript variant X1, mRNA	1928	84.37	1727	0	2991		XM_020537617.1	uncharacterized LOC100381417 (LOC100381417), transcript variant X2, mRNA	1942	81.65	1722	0	2886		NM_001302898.1	NM_001302898.1 length 1914 aa, 5745 bp, from 348..6092 of NM_001302898.1 Solanum lycopersicum endoribonuclease Dicer homolog 1 (DCL1), mRNA	1914	75.91	1814	0	2764		XM_010663220.2	endoribonuclease Dicer homolog 1 (LOC100264308), mRNA	1974	85.1	1732	0	3002		XM_007220511.2	endoribonuclease Dicer homolog 1 (LOC18784994), mRNA	1971	83.03	1721	0	2876
	UN000174	XM_011624653.2	protein CHROMATIN REMODELING 5 (LOC18433226), mRNA	1804	72.38	1477	0	1967		XM_009416676.2	protein CHROMATIN REMODELING 5 (LOC103995929), mRNA	1731	65.81	1784	0	2021		XM_008655214.2	protein CHROMATIN REMODELING 5-like (LOC103633530), transcript variant X3, mRNA	1724	67.07	1473	0	1749		XM_019211372.1	protein CHROMATIN REMODELING 5 (LOC101252967), transcript variant X4, mRNA	1706	65.11	1760	0	1921		XM_002275064.3	protein CHROMATIN REMODELING 5 (LOC100261898), mRNA	1764	72.72	1470	0	1944		XM_007214286.2	protein CHROMATIN REMODELING 5 (LOC18780086), mRNA	1761	70.49	1464	0	1878
	UN000175	XM_020670592.1	uncharacterized LOC18439860 (LOC18439860), mRNA	2224	62.07	2088	0	2527		XM_018831377.1	uncharacterized LOC103998490 (LOC103998490), mRNA	2167	66.56	1956	0	2618		XM_020548271.1	uncharacterized LOC103646324 (LOC103646324), mRNA	2412	66.82	1064	0	1432		XM_019213711.1	uncharacterized LOC104645663 (LOC104645663), mRNA	1181	55.31	1139	0	1262		XM_010652979.2	uncharacterized LOC100253550 (LOC100253550), mRNA	2319	70.25	2077	0	2970		XM_020565294.1	uncharacterized LOC109949510 (LOC109949510), mRNA	1772	69.6	1704	0	2375
	UN000177	XM_020667619.1	callose synthase 7 (LOC18422500), transcript variant X3, mRNA	1916	64.69	1198	0	1516		XM_009381614.2	callose synthase 7-like (LOC103968386), transcript variant X1, mRNA	1970	62.86	1217	0	1488		XM_020539334.1	uncharacterized LOC100502361 (LOC100502361), transcript variant X2, mRNA	1951	50.37	1209	0	1116		XM_010325327.2	callose synthase 7-like (LOC101249281), transcript variant X1, mRNA	1911	63.64	1191	0	1443		XM_010658818.2	callose synthase 7 (LOC100242081), mRNA	1944	64.4	1174	0	1432		XM_020559736.1	callose synthase 7 (LOC18781786), transcript variant X2, mRNA	1926	63.58	1186	0	1471
	UN000179	XM_006845978.3	uncharacterized LOC18435951 (LOC18435951), mRNA	1784	39.74	1316	0	751		XM_009390189.2	uncharacterized LOC103975273 (LOC103975273), transcript variant X1, mRNA	1705	40.93	1268	0	800		XM_008649315.2	hypothetical protein (LOC100502213), transcript variant X1, mRNA	1681	36.38	1344	0	662		XM_010320961.2	uncharacterized LOC101263805 (LOC101263805), transcript variant X3, mRNA	1655	37.43	1325	0	724		XM_010660296.2	uncharacterized LOC100253034 (LOC100253034), mRNA	1770	42.34	1318	0	936		XM_020557673.1	uncharacterized LOC18786849 (LOC18786849), transcript variant X1, mRNA	1754	41.18	1343	0	879
	UN000180	XM_011622311.2	protein RST1 (LOC18426777), transcript variant X2, mRNA	1869	48.3	1857	0	1565		XM_009405611.2	protein RST1 (LOC103987338), transcript variant X1, mRNA	1843	51.21	1855	0	1674		XM_008675433.2	protein RST1 (LOC103649701), transcript variant X2, mRNA	1825	42.72	1854	0	1298		XM_010317996.2	protein RST1 (LOC101252252), transcript variant X2, mRNA	1878	51.63	1871	0	1748		XM_010662568.2	protein RST1 (LOC100245681), mRNA	1885	58.69	1864	0	2036		XM_020558824.1	protein RST1 (LOC18782920), mRNA	1847	55.11	1858	0	1900
	UN000183	XM_006853630.3	MMS19 nucleotide excision repair protein homolog (LOC18443441), transcript variant X2, mRNA	1180	52.34	1173	0	1066		XM_018818680.1	MMS19 nucleotide excision repair protein homolog (LOC103997067), transcript variant X1, mRNA	1139	53.71	1158	0	1087		XM_008652775.2	uncharacterized LOC100217039 (LOC100217039), transcript variant X1, mRNA	1129	45.61	1162	0	897		XM_010320224.2	MMS19 nucleotide excision repair protein homolog (LOC101259141), transcript variant X1, mRNA	1143	49.18	1163	0	957		---	---	0	---	---	---	---		XM_007217479.2	MMS19 nucleotide excision repair protein homolog (LOC18782197), transcript variant X1, mRNA	1186	52.18	1169	0	1068
	UN000188	XM_020663738.1	nuclear pore complex protein NUP205 (LOC18428382), transcript variant X4, mRNA	1904	66.23	1889	0	2281		XM_009410704.2	nuclear pore complex protein NUP205 (LOC103991301), transcript variant X3, mRNA	1860	68.05	1881	0	2340		XM_008647152.2	nuclear pore complex protein NUP205 (LOC103626805), transcript variant X1, mRNA	1837	61.11	1885	0	2110		XM_010315389.2	nuclear pore complex protein NUP205 (LOC101260798), mRNA	1874	68.68	1887	0	2393		XM_010658121.2	nuclear pore complex protein NUP205 (LOC100266475), transcript variant X2, mRNA	1934	73.69	1889	0	2625		XM_020568381.1	nuclear pore complex protein NUP205 (LOC18769496), mRNA	1879	71.13	1891	0	2478
	UN000189	XM_006844308.3	uncharacterized LOC18434233 (LOC18434233), transcript variant X1, mRNA	1819	41.22	1475	0	861		XM_009409353.2	uncharacterized LOC103990276 (LOC103990276), transcript variant X2, mRNA	1658	41.68	1437	0	961		XM_008657462.2	Enhancer of polycomb-like transcription factor protein (LOC103634880), mRNA	1540	35.98	1362	0	658		XM_010326854.2	uncharacterized LOC101258290 (LOC101258290), transcript variant X1, mRNA	1719	55.08	630	0	657		XM_010650264.2	uncharacterized LOC100264575 (LOC100264575), transcript variant X1, mRNA	1693	46.54	1751	0	1312		XM_020567625.1	uncharacterized LOC18793508 (LOC18793508), transcript variant X1, mRNA	1773	47.13	1445	0	1148
	UN000190	XM_011628894.2	F-box protein At3g54460 (LOC18444529), mRNA	1373	74.78	781	0	1167		XM_009384309.2	F-box protein At3g54460 (LOC103970512), transcript variant X2, mRNA	1177	74.26	781	0	1156		XM_020550355.1	F-box protein At3g54460 (LOC103652266), transcript variant X1, mRNA	1267	68.69	776	0	1035		XM_004249812.2	F-box protein At3g54460 (LOC101260496), transcript variant X1, mRNA	1339	70.76	773	0	1090		XM_010647305.2	F-box protein At3g54460 (LOC100254946), transcript variant X1, mRNA	1386	76.74	778	0	1194		XM_020556677.1	F-box protein At3g54460 (LOC18787239), transcript variant X1, mRNA	1369	73.96	768	0	1137
	UN000192	XM_006855975.3	uncharacterized LOC18445849 (LOC18445849), transcript variant X1, mRNA	1821	52.92	565	2e-124	434		XM_009390675.2	uncharacterized LOC103975656 (LOC103975656), transcript variant X2, mRNA	1783	40.42	1059	9e-124	432		XM_008653777.2	GYF domain-containing protein (LOC103631932), mRNA	1706	47.35	547	2e-99	357		XM_010322082.2	uncharacterized LOC101267523 (LOC101267523), transcript variant X3, mRNA	1731	41.3	1058	5e-140	479		XM_010666376.2	uncharacterized LOC100262487 (LOC100262487), transcript variant X2, mRNA	1808	47.99	919	5e-179	592		XM_020559903.1	uncharacterized LOC18792304 (LOC18792304), mRNA	1833	46.71	1064	2e-178	590
	UN000193	---	---	0	---	---	---	---		---	---	0	---	---	---	---		---	---	0	---	---	---	---		XM_004250807.2	ribosomal protein S12, mitochondrial (LOC101262684), mRNA	224	88.14	59	1e-28	110		---	---	0	---	---	---	---		---	---	0	---	---	---	---
	UN000194	XM_020664618.1	pre-mRNA-processing protein 40A (LOC18422165), transcript variant X2, mRNA	1041	64.98	891	0	918		XM_009419896.2	pre-mRNA-processing protein 40A-like (LOC103998423), transcript variant X1, mRNA	1040	68.52	1026	0	1018		XM_008677324.2	pre-mRNA-processing protein 40A (LOC103651644), transcript variant X6, mRNA	1032	55.28	890	0	745		XM_010325127.2	pre-mRNA-processing protein 40A (LOC101256011), mRNA	1067	56.05	892	0	781		XM_010666182.2	pre-mRNA-processing protein 40A (LOC100243779), transcript variant X1, mRNA	1030	75.86	642	0	717		XM_007226968.2	pre-mRNA-processing protein 40A (LOC18791365), transcript variant X1, mRNA	1048	62.52	1038	0	914
	UN000196	XM_020664433.1	protein NETWORKED 1D (LOC18429645), transcript variant X6, mRNA	1881	43.98	789	4e-138	473		XM_009420660.2	protein NETWORKED 1B-like (LOC103999029), transcript variant X1, mRNA	1636	38.68	1745	0	870		XM_020546830.1	protein NETWORKED 1B (LOC103643709), transcript variant X1, mRNA	1536	34.64	1042	7e-114	398		XM_004247540.3	protein NETWORKED 1A (LOC101252434), mRNA	1866	38.65	1511	0	698		XM_010653699.2	protein NETWORKED 1D (LOC100852899), mRNA	1876	44.1	1576	0	908		XM_020556023.1	protein NETWORKED 1B (LOC18789916), transcript variant X1, mRNA	2019	39.73	1621	0	820
	UN000197	XM_006836243.3	ABC transporter C family member 2 (LOC18427186), mRNA	1625	79.99	1629	0	2609		XM_009409992.2	ABC transporter C family member 2-like (LOC103990745), transcript variant X1, mRNA	1633	82.15	1630	0	2652		XM_008670650.2	ABC transporter C family member 2 (LOC103645927), transcript variant X1, mRNA	1634	78.34	1630	0	2523		XM_004244484.3	ABC transporter C family member 2 (LOC101253706), transcript variant X1, mRNA	1629	77.8	1635	0	2482		XM_002280783.3	ABC transporter C family-like (LOC100251535), transcript variant X1, mRNA	1623	82.07	1629	0	2646		XM_007214502.2	ABC transporter C family member 2 (LOC18779311), transcript variant X1, mRNA	1631	80.82	1637	0	2595
	UN000198	XM_020667198.1	uncharacterized LOC18434233 (LOC18434233), transcript variant X4, mRNA	1806	41.23	1477	0	878		XM_009382979.2	uncharacterized LOC103969453 (LOC103969453), mRNA	1649	41.31	1467	0	979		XM_008657462.2	Enhancer of polycomb-like transcription factor protein (LOC103634880), mRNA	1540	35.71	1078	2e-166	543		XM_010326854.2	uncharacterized LOC101258290 (LOC101258290), transcript variant X1, mRNA	1719	55.08	630	0	657		XM_010650264.2	uncharacterized LOC100264575 (LOC100264575), transcript variant X1, mRNA	1693	47.5	1602	0	1278		XM_020567625.1	uncharacterized LOC18793508 (LOC18793508), transcript variant X1, mRNA	1773	47.19	1479	0	1165
	UN000199	XM_006844847.3	callose synthase 12 (LOC18434784), mRNA	1804	71.95	1786	0	2532		XM_009396761.2	callose synthase 12-like (LOC103980372), transcript variant X2, mRNA	1837	75.16	1759	0	2601		XM_008676820.2	callose synthase 11 (LOC103651198), mRNA	1792	68.59	1770	0	2424		XM_004243304.3	callose synthase 12 (LOC101243903), transcript variant X1, mRNA	1768	73.62	1755	0	2593		XM_010658666.2	callose synthase 12 (LOC100242010), mRNA	1774	75.31	1758	0	2616		XM_007198843.2	callose synthase 12 (LOC18766055), mRNA	1775	75	1764	0	2635
	UN000200	XM_006847526.3	3-ketoacyl-CoA synthase 4 (LOC18437316), mRNA	538	86.26	495	0	876		XM_009408021.2	3-ketoacyl-CoA synthase 4-like (LOC103989220), mRNA	582	84.48	496	0	877		NM_001137050.1	NM_001137050.1 length 505 aa, 1518 bp, from 239..1756 of NM_001137050.1 Zea mays uncharacterized LOC100191621 (pco084555(107)), mRNA	505	83.5	491	0	845		XM_004238223.3	3-ketoacyl-CoA synthase 4 (LOC101263606), mRNA	563	85.31	490	0	900		XM_019219003.1	3-ketoacyl-CoA synthase 4 (LOC100853861), transcript variant X3, mRNA	515	89.32	487	0	925		XM_007200905.2	3-ketoacyl-CoA synthase 4 (LOC18768236), mRNA	527	83.63	507	0	900
	UN000202	XM_006829781.3	uncharacterized LOC18425215 (LOC18425215), mRNA	1413	62.93	1400	0	1664		XM_018829178.1	helicase sen1 (LOC103993084), transcript variant X4, mRNA	1381	67.76	1405	0	1840		NM_001323891.1	NM_001323891.1 length 1417 aa, 4254 bp, from 369..4622 of NM_001323891.1 Zea mays P-loop containing nucleoside triphosphate hydrolase superfamily protein (LOC100502266), mRNA	1417	62.1	1438	0	1678		XM_010321856.2	probable helicase senataxin (LOC101247908), transcript variant X3, mRNA	1387	67.55	1402	0	1843		XM_010666004.2	uncharacterized ATP-dependent helicase C29A10.10c (LOC100255680), transcript variant X1, mRNA	1401	73.14	1411	0	1997		XM_007227020.2	uncharacterized LOC18792248 (LOC18792248), mRNA	1383	70.63	1403	0	1932
	UN000203	XM_020674042.1	bromodomain and WD repeat-containing protein 1 (LOC18445066), transcript variant X10, mRNA	1779	60.56	1800	0	1880		XM_009385655.2	PH-interacting protein-like (LOC103971597), transcript variant X1, mRNA	1780	58.4	1803	0	1831		XM_008657430.2	bromodomain and WD repeat-containing protein 3 (LOC103634840), transcript variant X4, mRNA	1681	59.96	1114	0	1168		XM_010320635.2	bromodomain and WD repeat-containing protein 3 (LOC101244028), mRNA	1714	56.62	1768	0	1757		XM_019220116.1	bromodomain and WD repeat-containing protein 3 (LOC100248159), transcript variant X2, mRNA	1793	63.72	1775	0	2003		XM_020564472.1	bromodomain and WD repeat-containing protein 1 (LOC18792908), transcript variant X1, mRNA	1761	57.58	1782	0	1779
	UN000204	XM_020666153.1	E3 ubiquitin-protein ligase SHPRH (LOC18432351), transcript variant X1, mRNA	1697	58.54	1734	0	1875		XM_009393400.2	E3 ubiquitin-protein ligase SHPRH (LOC103977787), mRNA	1725	55.79	1728	0	1818		XM_008655251.2	E3 ubiquitin-protein ligase SHPRH (LOC103633565), transcript variant X1, mRNA	1695	52.38	1682	0	1613		XM_010319926.2	E3 ubiquitin-protein ligase SHPRH (LOC101254366), mRNA	1693	56.57	1736	0	1794		XM_010659865.2	E3 ubiquitin-protein ligase SHPRH (LOC100248506), transcript variant X1, mRNA	1692	59.98	1734	0	1977		XM_020558159.1	E3 ubiquitin-protein ligase SHPRH (LOC18786963), transcript variant X1, mRNA	1682	58.46	1731	0	1873
	UN000206	XM_011628195.2	E3 ubiquitin-protein ligase KEG (LOC18442826), mRNA	1610	64.2	81	8e-26	116		XM_009419448.2	E3 ubiquitin-protein ligase KEG (LOC103998068), mRNA	1648	77.14	70	8e-27	120		XM_008651385.2	E3 ubiquitin-protein ligase KEG (LOC103630320), mRNA	1627	71.43	70	2e-25	115		XM_004229985.3	E3 ubiquitin-protein ligase KEG (LOC101267560), mRNA	1639	55.28	161	2e-36	151		XM_010660793.2	E3 ubiquitin-protein ligase KEG (LOC100265166), transcript variant X1, mRNA	1632	82.56	86	1e-35	149		XM_020558612.1	E3 ubiquitin-protein ligase KEG (LOC18786843), transcript variant X2, mRNA	1620	89.33	75	9e-34	142
	UN000207	XM_020663490.1	uncharacterized LOC18427934 (LOC18427934), mRNA	1830	54.3	407	1e-95	343		XM_009422791.2	uncharacterized LOC104000687 (LOC104000687), mRNA	1708	59.31	408	2e-121	421		XM_008669885.2	hypothetical protein (pco061809), transcript variant X1, mRNA	1604	62.15	317	3e-93	335		XM_004236439.3	uncharacterized LOC101264110 (LOC101264110), mRNA	1661	60.58	312	9e-98	349		XM_002281360.4	uncharacterized LOC100262175 (LOC100262175), transcript variant X1, mRNA	1727	60.86	419	4e-123	426		XM_007210426.2	uncharacterized LOC18775693 (LOC18775693), transcript variant X1, mRNA	1694	56.97	423	6e-114	398
	UN000208	XM_006843582.3	clathrin heavy chain 2 (LOC18433494), mRNA	1703	94.98	1655	0	3170		XM_009388203.2	clathrin heavy chain 1-like (LOC103973586), mRNA	1705	94.27	1657	0	3162		XM_020550623.1	clathrin heavy chain 1 (LOC103652644), mRNA	1710	93.36	1657	0	3129		XM_004239899.3	clathrin heavy chain 1-like (LOC101259158), mRNA	1706	92.94	1657	0	3134		XM_002276819.3	clathrin heavy chain 2 (LOC100251869), mRNA	1705	95.59	1657	0	3199		XM_007218820.2	clathrin heavy chain 1 (LOC18786946), mRNA	1701	94.27	1657	0	3172
	UN000212	XM_020666687.1	anaphase-promoting complex subunit 1 (LOC18433474), transcript variant X3, mRNA	1828	64.53	1838	0	2162		XM_009416006.2	anaphase-promoting complex subunit 1 (LOC103995420), transcript variant X1, mRNA	1822	63.88	1841	0	2202		XM_020539529.1	anaphase-promoting complex subunit 1 (LOC103631492), transcript variant X2, mRNA	1853	59.82	1812	0	1979		XM_010323798.1	anaphase-promoting complex subunit 1 (LOC101245767), mRNA	1806	63.88	1830	0	2115		XM_010659958.2	anaphase-promoting complex subunit 1 (LOC100241661), transcript variant X2, mRNA	1832	68.81	1834	0	2360		XM_007220967.2	anaphase-promoting complex subunit 1 (LOC18785557), mRNA	1822	66.83	1827	0	2280
	UN000213	XM_006844847.3	callose synthase 12 (LOC18434784), mRNA	1804	73.14	1817	0	2573		XM_009396761.2	callose synthase 12-like (LOC103980372), transcript variant X2, mRNA	1837	74.82	1799	0	2605		XM_008676820.2	callose synthase 11 (LOC103651198), mRNA	1792	68.43	1774	0	2387		XM_004243304.3	callose synthase 12 (LOC101243903), transcript variant X1, mRNA	1768	74.9	1785	0	2615		XM_010658666.2	callose synthase 12 (LOC100242010), mRNA	1774	76.25	1785	0	2642		XM_007198843.2	callose synthase 12 (LOC18766055), mRNA	1775	76.77	1769	0	2659
	UN000214	XM_011625479.2	protein TSS (LOC18435314), transcript variant X2, mRNA	1789	58.93	1249	0	1388		XM_009422456.2	protein TSS (LOC104000418), transcript variant X3, mRNA	1696	56.29	1732	0	1798		XM_008670562.2	protein TSS (LOC103645852), transcript variant X1, mRNA	1749	51.78	1765	0	1630		XM_004241643.3	protein TSS (LOC101261719), transcript variant X1, mRNA	1719	54.37	1762	0	1738		XM_003632768.3	protein TSS (LOC100254354), transcript variant X1, mRNA	1702	60.46	1740	0	1939		XM_007217633.2	protein TSS (LOC18782174), mRNA	1666	56.4	1757	0	1773
	UN000215	XM_020664366.1	uncharacterized LOC18429133 (LOC18429133), mRNA	1788	56.68	1288	0	1375		XM_009383670.2	uncharacterized LOC103970039 (LOC103970039), transcript variant X1, mRNA	1831	54.7	1786	0	1816		NM_001350000.1	NM_001350000.1 length 1804 aa, 5415 bp, from 103..5517 of NM_001350000.1 Zea mays uncharacterized LOC100278565 (LOC100278565), mRNA	1804	49.42	1803	0	1637		XM_019215297.1	uncharacterized LOC101255721 (LOC101255721), transcript variant X2, mRNA	1770	52.73	1796	0	1738		XM_010648071.2	uncharacterized LOC100855390 (LOC100855390), mRNA	1833	60.16	1787	0	2055		XM_007210112.2	uncharacterized LOC18775749 (LOC18775749), mRNA	1847	57.42	1792	0	1913
	UN000216	XM_020671409.1	lysine-specific demethylase 5B (LOC18423039), transcript variant X2, mRNA	1890	52.79	1629	0	1619		XM_009419990.2	lysine-specific demethylase 5B (LOC103998506), transcript variant X2, mRNA	1845	55.76	1874	0	1972		XM_008646910.2	lysine-specific demethylase 5B (LOC103626493), transcript variant X2, mRNA	1875	47.3	1609	0	1385		XM_010327105.2	lysine-specific demethylase 5A (LOC101259658), transcript variant X1, mRNA	1855	51.4	1611	0	1538		XM_010662466.2	lysine-specific demethylase 5B (LOC100261599), transcript variant X4, mRNA	1851	58.83	1875	0	2082		XM_020563728.1	lysine-specific demethylase 5D (LOC18776513), transcript variant X1, mRNA	1851	54.53	1876	0	1956
	UN000217	XM_011629059.2	bromodomain and WD repeat-containing protein 1 (LOC18445066), transcript variant X9, mRNA	1782	67.85	1014	0	1263		XM_009385655.2	PH-interacting protein-like (LOC103971597), transcript variant X1, mRNA	1780	66.3	1012	0	1244		XM_008657430.2	bromodomain and WD repeat-containing protein 3 (LOC103634840), transcript variant X4, mRNA	1681	65.67	871	0	1110		XM_010320635.2	bromodomain and WD repeat-containing protein 3 (LOC101244028), mRNA	1714	65.94	1007	0	1224		XM_010651225.2	bromodomain and WD repeat-containing protein 3 (LOC100248159), transcript variant X1, mRNA	1828	68.65	1040	0	1325		XM_020564472.1	bromodomain and WD repeat-containing protein 1 (LOC18792908), transcript variant X1, mRNA	1761	65.37	1057	0	1266
	UN000220	XM_011629723.2	uncharacterized LOC18446935 (LOC18446935), transcript variant X2, mRNA	1743	66.69	1726	0	2117		XM_009403091.2	uncharacterized LOC103985411 (LOC103985411), mRNA	1737	73.63	1642	0	2359		XM_020552629.1	uncharacterized LOC103655564 (LOC103655564), mRNA	1698	62.19	1674	0	1937		XM_004240635.3	uncharacterized LOC101267123 (LOC101267123), transcript variant X1, mRNA	1691	72.69	1637	0	2310		XM_002282753.4	uncharacterized LOC100259525 (LOC100259525), transcript variant X1, mRNA	1683	79.17	1637	0	2538		XM_007225419.2	uncharacterized LOC18791545 (LOC18791545), transcript variant X2, mRNA	1699	76.76	1644	0	2439
	UN000222	XM_006854307.3	ABC transporter C family member 5 (LOC18444129), transcript variant X1, mRNA	1522	82.26	1471	0	2395		XM_009383916.2	ABC transporter C family member 5-like (LOC103970224), transcript variant X1, mRNA	1502	81.52	1472	0	2372		NM_001112590.1	NM_001112590.1 length 1510 aa, 4533 bp, from 244..4776 of NM_001112590.1 Zea mays ABC transporter C family MRP4 (MRP4), mRNA	1510	74.46	1437	0	2107		XM_004247079.2	ABC transporter C family member 5 (LOC101244990), transcript variant X1, mRNA	1546	80.46	1479	0	2330		XM_010654122.2	ABC transporter C family member 5 (LOC100258320), mRNA	1532	83.69	1478	0	2425		XM_007200278.2	ABC transporter C family member 5 (LOC18768484), transcript variant X1, mRNA	1536	82.17	1481	0	2384
	UN000224	XM_006836200.3	proteasome-associated protein ECM29 homolog (LOC18427145), transcript variant X9, mRNA	1845	67.2	1796	0	2417		XM_009412158.2	proteasome-associated protein ECM29 homolog (LOC103992459), mRNA	1824	66.63	1804	0	2412		XM_020552775.1	proteasome-associated protein ECM29 homolog (LOC103655792), transcript variant X1, mRNA	1808	61.68	1793	0	2203		XM_010314918.2	proteasome-associated protein ECM29 homolog (LOC101250081), transcript variant X1, mRNA	1824	63.69	1804	0	2332		XM_010653244.2	proteasome-associated protein ECM29 homolog (LOC100244477), mRNA	1830	70.79	1801	0	2564		XM_007213227.2	proteasome-associated protein ECM29 homolog (LOC18779609), transcript variant X1, mRNA	1843	67.3	1801	0	2434
	UN000226	XM_020676502.1	putative 1-phosphatidylinositol-3-phosphate 5-kinase FAB1C (LOC18449112), transcript variant X4, mRNA	1669	50.76	924	0	752		XM_018827122.1	1-phosphatidylinositol-3-phosphate 5-kinase FAB1A-like (LOC103983699), transcript variant X4, mRNA	1546	48.21	896	0	673		XM_008654468.2	putative 1-phosphatidylinositol-3-phosphate 5-kinase FAB1C (LOC103632727), mRNA	1628	37.44	999	6e-176	577		XM_010314505.2	putative 1-phosphatidylinositol-3-phosphate 5-kinase FAB1D (LOC101259601), transcript variant X1, mRNA	1666	42.72	1058	0	712		XM_010666734.2	putative 1-phosphatidylinositol-3-phosphate 5-kinase FAB1D (LOC100242669), mRNA	1674	46.29	1806	0	1304		XM_007201707.2	putative 1-phosphatidylinositol-3-phosphate 5-kinase FAB1D (LOC18767912), mRNA	1636	44.27	1719	0	1165
	UN000229	XM_020669660.1	uncharacterized LOC18437646 (LOC18437646), transcript variant X14, mRNA	1741	35.92	774	1e-123	429		XM_009390943.2	uncharacterized LOC103975842 (LOC103975842), transcript variant X2, mRNA	1856	40.57	806	5e-151	511		XM_008648038.2	uncharacterized LOC103627728 (LOC103627728), mRNA	646	30.97	494	6e-55	205		XM_004246834.3	uncharacterized LOC101258404 (LOC101258404), mRNA	1854	37.86	729	5e-130	449		XM_010656142.2	uncharacterized LOC100267761 (LOC100267761), transcript variant X1, mRNA	1901	46.03	756	2e-156	527		XM_020560489.1	uncharacterized LOC18783623 (LOC18783623), transcript variant X4, mRNA	1647	40.22	803	6e-146	493
	UN000234	XM_020668457.1	uncharacterized LOC18436035 (LOC18436035), transcript variant X1, mRNA	543	76.94	503	0	813		XM_009416043.2	uncharacterized LOC103995446 (LOC103995446), mRNA	565	75.57	528	0	802		NM_001175917.1	NM_001175917.1 length 542 aa, 1629 bp, from 452..2080 of NM_001175917.1 Zea mays HSP20-like chaperones superfamily protein (LOC100383256), mRNA	542	66.06	545	0	697		XM_004249562.3	uncharacterized LOC101258910 (LOC101258910), mRNA	500	73.76	503	0	765		XM_002263750.3	uncharacterized LOC100254432 (LOC100254432), mRNA	502	79.32	503	0	832		XM_007207306.2	uncharacterized LOC18774070 (LOC18774070), transcript variant X1, mRNA	502	76.79	504	0	792
	UN000236	XM_020661861.1	phosphatidate phosphatase PAH2 (LOC18425103), mRNA	1421	59.77	614	0	685		XM_009405729.2	phosphatidate phosphatase PAH2-like (LOC103987430), transcript variant X4, mRNA	1257	63.44	517	0	629		XM_008679737.2	phosphatidate phosphatase PAH2 (LOC103652775), transcript variant X3, mRNA	1254	61.54	520	0	633		XM_004246686.3	phosphatidate phosphatase PAH1-like (LOC101243737), transcript variant X4, mRNA	903	62.23	413	2e-167	522		XM_010666275.2	phosphatidate phosphatase PAH2 (LOC100266011), transcript variant X3, mRNA	1169	51.39	757	0	672		XM_020570391.1	phosphatidate phosphatase PAH2 (LOC18793032), transcript variant X1, mRNA	984	75.79	318	3e-159	503
	UN000237	XM_020667505.1	phosphoinositide 3-kinase regulatory subunit 4 (LOC18434819), transcript variant X1, mRNA	1534	66.71	1562	0	1900		XM_009401285.2	phosphoinositide 3-kinase regulatory subunit 4 (LOC103983927), transcript variant X1, mRNA	1554	67.96	1567	0	1961		XM_008648172.2	phosphoinositide 3-kinase regulatory subunit 4 (LOC103627860), transcript variant X1, mRNA	1480	55.95	1589	0	1537		XM_010320940.2	probable serine/threonine-protein kinase vps15 (LOC101248472), transcript variant X1, mRNA	1552	67.47	1568	0	1985		XM_010657950.2	probable serine/threonine-protein kinase vps15 (LOC100256057), transcript variant X1, mRNA	1545	72.3	1574	0	2128		XM_020557852.1	phosphoinositide 3-kinase regulatory subunit 4 (LOC18786270), transcript variant X1, mRNA	1564	71.7	1569	0	2108
	UN000241	XM_020663297.1	protein MON2 homolog (LOC18421407), transcript variant X3, mRNA	1690	72.05	1306	0	1810		XM_009407466.2	protein MON2 homolog (LOC103988821), transcript variant X1, mRNA	1662	71.95	1344	0	1865		XM_020550458.1	protein MON2 homolog (LOC103652462), transcript variant X1, mRNA	1622	69.13	1273	0	1660		XM_010327445.2	protein MON2 homolog (LOC101244609), transcript variant X4, mRNA	1622	72.73	1254	0	1795		XM_010661648.2	protein MON2 homolog (LOC100264068), transcript variant X1, mRNA	1686	74.78	1344	0	1934		XM_020565504.1	protein MON2 homolog (LOC18773502), transcript variant X1, mRNA	1666	73.06	1340	0	1875
	UN000242	XM_011624588.2	protein SHOOT GRAVITROPISM 6 (LOC18432942), transcript variant X5, mRNA	1750	69.08	1698	0	2267		XM_018830121.1	protein SHOOT GRAVITROPISM 6 (LOC103982124), mRNA	1736	70.73	1708	0	2335		XM_020545050.1	protein SHOOT GRAVITROPISM 6 (LOC103644425), transcript variant X1, mRNA	1768	64.5	1707	0	2062		XM_010327654.2	protein SHOOT GRAVITROPISM 6 (LOC101255025), transcript variant X1, mRNA	1731	70.35	1710	0	2359		XM_010655698.2	protein SHOOT GRAVITROPISM 6 (LOC100243631), transcript variant X1, mRNA	1727	75.19	1709	0	2505		XM_007203146.2	protein SHOOT GRAVITROPISM 6 (LOC18769061), mRNA	1748	73.36	1708	0	2419
	UN000245	XM_006850835.3	uncharacterized LOC18440697 (LOC18440697), mRNA	821	58.14	633	0	622		XM_009392181.2	uncharacterized LOC103976852 (LOC103976852), mRNA	817	62.79	516	0	590		XM_008665742.2	TBC1 domain family member 5 homolog B (LOC103642476), mRNA	877	59.47	533	6e-179	537		XM_004242773.3	uncharacterized LOC101260951 (LOC101260951), mRNA	830	60.32	630	0	667		XM_002269458.4	uncharacterized LOC100250355 (LOC100250355), mRNA	830	65.34	626	0	728		XM_007214571.2	uncharacterized LOC18778482 (LOC18778482), transcript variant X1, mRNA	840	63.96	627	0	697
	UN000246	XM_006836145.3	uncharacterized LOC18427088 (LOC18427088), mRNA	1513	46.26	227	4e-35	144		XM_009384986.2	uncharacterized LOC103971045 (LOC103971045), transcript variant X2, mRNA	1574	42.35	614	8e-96	328		XM_020550437.1	Ulp1 protease family C-terminal catalytic domain containing protein expressed (LOC103651090), transcript variant X2, mRNA	1085	31.13	681	1e-60	223		XM_019215990.1	uncharacterized LOC101262975 (LOC101262975), mRNA	1854	46.25	307	2e-52	199		XM_010654839.2	uncharacterized LOC100248405 (LOC100248405), transcript variant X5, mRNA	1892	43.57	677	5e-104	353		XM_020568108.1	uncharacterized LOC18771882 (LOC18771882), transcript variant X1, mRNA	1294	43.87	595	5e-101	340
	UN000248	XM_020664432.1	protein NETWORKED 1D (LOC18429645), transcript variant X5, mRNA	1869	45.75	789	7e-139	474		XM_009420660.2	protein NETWORKED 1B-like (LOC103999029), transcript variant X1, mRNA	1636	39.41	1695	0	881		XM_020546830.1	protein NETWORKED 1B (LOC103643709), transcript variant X1, mRNA	1536	32.63	1707	6e-173	564		XM_004247540.3	protein NETWORKED 1A (LOC101252434), mRNA	1866	38	1479	0	657		XM_010653699.2	protein NETWORKED 1D (LOC100852899), mRNA	1876	43.92	1562	0	876		XM_020570181.1	protein NETWORKED 1D (LOC18767555), transcript variant X1, mRNA	1805	42.07	1514	0	772
	UN000249	XM_011624670.2	DNA helicase INO80 (LOC18433310), transcript variant X2, mRNA	1537	76.6	970	0	1509		XM_009414542.2	DNA helicase INO80 (LOC103994210), transcript variant X1, mRNA	1555	73.91	989	0	1458		XM_020544465.1	DNA helicase INO80 (LOC103640309), mRNA	1483	70.11	910	0	1303		XM_004236536.3	DNA helicase INO80 (LOC101260036), mRNA	1539	75.91	934	0	1473		XM_010655438.2	DNA helicase INO80 (LOC100250397), transcript variant X2, mRNA	1506	77.66	998	0	1549		XM_020567950.1	DNA helicase INO80 (LOC18770485), transcript variant X2, mRNA	1459	75.94	935	0	1440
	UN000251	XM_020663065.1	uncharacterized LOC18427375 (LOC18427375), transcript variant X2, mRNA	1872	44.1	1093	0	631		XM_009408657.2	uncharacterized LOC103989714 (LOC103989714), transcript variant X3, mRNA	1682	35.55	1654	0	652		XM_020539126.1	uncharacterized LOC100384382 (LOC100384382), transcript variant X1, mRNA	1653	37.59	931	3e-128	440		XM_004237633.3	uncharacterized LOC101263808 (LOC101263808), mRNA	1678	42.77	1038	0	623		XM_010660121.2	uncharacterized LOC100240985 (LOC100240985), transcript variant X2, mRNA	1737	40.43	1687	0	860		XM_020557545.1	uncharacterized LOC18786141 (LOC18786141), transcript variant X2, mRNA	1723	45.28	1027	0	679
	UN000253	XM_020674552.1	histone-lysine N-methyltransferase SUVR5 (LOC18445968), transcript variant X1, mRNA	1623	57.52	565	0	628		XM_009401774.2	histone-lysine N-methyltransferase SUVR5 (LOC103984293), transcript variant X5, mRNA	1301	55.32	555	0	615		XM_020538665.1	histone-lysine N-methyltransferase SUVR5-like (LOC103627629), transcript variant X8, mRNA	1017	48.64	551	2e-159	507		XM_010317876.2	histone-lysine N-methyltransferase SUVR5 (LOC101257733), transcript variant X1, mRNA	1508	55.52	553	0	620		XM_002269723.4	histone-lysine N-methyltransferase SUVR5 (LOC100251309), transcript variant X1, mRNA	1517	61.13	566	0	671		XM_007204738.2	histone-lysine N-methyltransferase SUVR5 (LOC18771069), transcript variant X1, mRNA	1515	54.97	584	0	608
	UN000254	XM_006847677.3	uncharacterized LOC18437469 (LOC18437469), transcript variant X2, mRNA	1580	35.14	535	8e-58	220		XM_018818245.1	uncharacterized LOC103998755 (LOC103998755), transcript variant X1, mRNA	1701	34.93	1337	3e-140	469		XM_008661696.2	RING/FYVE/PHD zinc finger superfamily protein (LOC103638903), mRNA	1593	52.1	167	1e-38	159		XM_019212986.1	uncharacterized LOC101244850 (LOC101244850), transcript variant X11, mRNA	1381	36.91	802	4e-107	370		XM_002270271.4	uncharacterized LOC100261463 (LOC100261463), transcript variant X4, mRNA	1581	38.7	1341	0	588		XM_020556162.1	uncharacterized LOC18787726 (LOC18787726), transcript variant X5, mRNA	1491	39.9	837	2e-131	441
	UN000255	XM_006836841.3	transcription factor bHLH13 (LOC18427795), mRNA	565	46.19	617	7e-150	444		XM_018819990.1	transcription factor ABA-INDUCIBLE bHLH-TYPE-like (LOC103968943), transcript variant X1, mRNA	592	47.44	624	1e-170	498		NM_001152773.1	NM_001152773.1 length 634 aa, 1905 bp, from 234..2138 of NM_001152773.1 Zea mays uncharacterized LOC100279818 (LOC100279818), mRNA	634	44.5	645	4e-151	450		XM_004229943.3	transcription factor bHLH13-like (LOC101254734), mRNA	605	54.01	611	0	606		NM_001281045.1	NM_001281045.1 length 608 aa, 1827 bp, from 1..1827 of NM_001281045.1 Vitis vinifera Myc2 bHLH protein (MYC2), mRNA	608	58.29	609	0	639		XM_007220142.2	transcription factor bHLH13 (LOC18786395), mRNA	666	53.63	619	0	559
	UN000257	XM_011625747.2	187-kDa microtubule-associated protein AIR9 (LOC18435937), transcript variant X1, mRNA	1738	74.82	1660	0	2453		XM_009420729.2	187-kDa microtubule-associated protein AIR9-like (LOC103999077), transcript variant X1, mRNA	1746	70.14	1725	0	2398		XM_008653791.2	187-kDa microtubule-associated protein AIR9 (LOC103631942), transcript variant X1, mRNA	1649	64.02	1637	0	2111		XM_004233095.3	187-kDa microtubule-associated protein AIR9 (LOC101253746), transcript variant X3, mRNA	1746	68.43	1660	0	2310		XM_002274911.4	187-kDa microtubule-associated protein AIR9 (LOC100253161), transcript variant X7, mRNA	1717	74.03	1721	0	2510		XM_020561785.1	187-kDa microtubule-associated protein AIR9 (LOC18780861), transcript variant X1, mRNA	1718	78.61	1463	0	2424
	UN000258	XM_020664793.1	protein GFS12 (LOC18430023), transcript variant X1, mRNA	1664	58.43	1696	0	1907		XM_018820579.1	protein GFS12 (LOC103971409), transcript variant X5, mRNA	1607	62.83	1547	0	1850		XM_008675783.2	protein GFS12 (LOC103650138), transcript variant X1, mRNA	1670	54.76	1700	0	1723		XM_004253108.3	protein GFS12 (LOC101260031), transcript variant X1, mRNA	1662	55.5	1699	0	1813		XM_010651363.2	protein GFS12 (LOC100266683), transcript variant X1, mRNA	1681	62.82	1697	0	2078		XM_020555130.1	protein GFS12 (LOC18790168), mRNA	1678	62.08	1701	0	2000
	UN000260	XM_011630195.2	uncharacterized LOC18448051 (LOC18448051), transcript variant X1, mRNA	2747	42.69	1717	0	1134		XM_009395050.2	uncharacterized LOC103979039 (LOC103979039), transcript variant X2, mRNA	2304	42.63	1757	0	1175		XM_020548120.1	uncharacterized LOC103645921 (LOC103645921), mRNA	2643	37.64	1743	0	919		XM_010318843.2	uncharacterized LOC101258227 (LOC101258227), transcript variant X4, mRNA	2089	37.95	1731	0	957		XM_010646137.2	uncharacterized LOC100264016 (LOC100264016), transcript variant X2, mRNA	2645	47.05	1730	0	1380		XM_020562161.1	uncharacterized LOC109948577 (LOC109948577), mRNA	2600	43.09	1736	0	1169
	UN000261	XM_020676056.1	zinc finger CCCH domain-containing protein 38 (LOC18448339), transcript variant X5, mRNA	814	66.67	81	3e-27	119		XM_009388216.2	uncharacterized LOC103973599 (LOC103973599), transcript variant X1, mRNA	1586	40.96	564	2e-81	294		XM_008646835.2	uncharacterized LOC100383458 (LOC100383458), transcript variant X2, mRNA	943	44.04	327	7e-57	214		XM_010324280.2	uncharacterized LOC101261830 (LOC101261830), transcript variant X2, mRNA	1345	47.41	348	4e-70	258		XM_019226503.1	uncharacterized LOC100246698 (LOC100246698), transcript variant X6, mRNA	1572	36.17	1244	2e-128	431		XM_020564327.1	uncharacterized LOC18777225 (LOC18777225), transcript variant X1, mRNA	1635	42.07	523	6e-75	273
	UN000262	XM_006854354.3	increased DNA methylation 1 (LOC18444177), transcript variant X1, mRNA	1740	58.8	534	0	622		XM_009388399.2	increased DNA methylation 1-like (LOC103973752), mRNA	1655	61.73	486	0	604		XM_008665537.2	Increased DNA methylation 1 (LOC103642225), transcript variant X2, mRNA	1347	52.32	495	4e-163	498		XM_010326085.2	increased DNA methylation 1 (LOC101265659), transcript variant X3, mRNA	1160	57.32	492	0	564		XM_019217158.1	increased DNA methylation 1 (LOC100248637), transcript variant X2, mRNA	1416	61.17	497	0	594		XM_020561198.1	increased DNA methylation 1 (LOC18778304), transcript variant X1, mRNA	1504	63.39	489	0	615
	UN000264	XM_020663749.1	transcriptional elongation regulator MINIYO (LOC18428441), transcript variant X1, mRNA	1650	58.49	212	6e-61	228		XM_018828146.1	transcriptional elongation regulator MINIYO (LOC103986745), mRNA	1249	61.32	212	3e-63	235		XM_008661482.2	transcriptional elongation regulator MINIYO (LOC103638625), transcript variant X2, mRNA	1401	55.5	209	2e-55	211		XM_004231410.3	transcriptional elongation regulator MINIYO (LOC101256927), mRNA	1580	57.58	231	2e-62	233		XM_010648084.2	transcriptional elongation regulator MINIYO (LOC100258889), transcript variant X2, mRNA	1524	69.09	220	5e-80	287		XM_020570680.1	transcriptional elongation regulator MINIYO (LOC18767645), mRNA	1526	59.15	235	1e-68	253
	UN000265	XM_006844836.3	homeobox-DDT domain protein RLT2 (LOC18434773), transcript variant X3, mRNA	1749	60.53	1581	0	1648		XM_009416975.2	homeobox-DDT domain protein RLT2-like (LOC103996133), transcript variant X2, mRNA	1845	62.95	1606	0	1697		XM_008676999.2	homeobox-DDT domain protein RLT2-like (LOC103651374), transcript variant X1, mRNA	1840	55.13	1607	0	1420		XM_004243334.3	homeobox-DDT domain protein RLT2 (LOC101253299), mRNA	1782	56.16	1590	0	1488		XM_002275236.4	homeobox-DDT domain protein RLT2 (LOC100250601), transcript variant X2, mRNA	1772	65.71	1595	0	1826		XM_020561612.1	homeobox-DDT domain protein RLT1 (LOC18778311), transcript variant X1, mRNA	1815	56.59	1571	0	1478
	UN000266	XM_006844505.3	uncharacterized LOC18434435 (LOC18434435), mRNA	1699	54.44	1699	0	1813		XM_009417594.2	uncharacterized LOC103996642 (LOC103996642), mRNA	1704	55.59	1698	0	1826		XM_008672571.2	hypothetical protein (LOC103648073), transcript variant X2, mRNA	1700	52.15	1701	0	1719		XM_010320018.2	uncharacterized LOC104646477 (LOC104646477), mRNA	1710	56.1	1704	0	1859		XM_002284278.4	uncharacterized LOC100247409 (LOC100247409), mRNA	1712	58.01	1710	0	1954		XM_007210001.2	uncharacterized LOC18777725 (LOC18777725), mRNA	1718	55.4	1704	0	1861
	UN000272	XM_011630083.2	SNC1 1 (LOC18447812), mRNA	1678	38.18	1328	5e-168	550		XM_009414790.2	protein MODIFIER OF SNC1 1-like (LOC103994451), transcript variant X1, mRNA	1624	39.31	982	8e-132	448		XM_008662300.2	protein MODIFIER OF SNC1 1 (LOC103639563), transcript variant X1, mRNA	1502	30.2	1563	1e-101	358		XM_004236181.3	protein MODIFIER OF SNC1 1 (LOC101257353), mRNA	1581	37.25	988	2e-98	349		XM_010664836.2	protein MODIFIER OF SNC1 1 (LOC104882280), transcript variant X2, mRNA	1615	38.87	1644	0	698		XM_020564933.1	protein MODIFIER OF SNC1 1 (LOC18776699), mRNA	1677	45.2	843	6e-146	488
	UN000275	---	---	0	---	---	---	---		---	---	0	---	---	---	---		---	---	0	---	---	---	---		XM_004228523.3	protein Ycf2-like (LOC101257292), mRNA	2278	85.75	435	0	679		---	---	0	---	---	---	---		---	---	0	---	---	---	---
	UN000276	XM_020672699.1	transcription elongation factor SPT6-like (LOC18442843), mRNA	1837	63.39	1464	0	1761		XM_009381982.2	transcription elongation factor SPT6-like (LOC103968684), transcript variant X1, mRNA	1742	70.14	1507	0	1992		XM_008651595.1	transcription elongation factor SPT6 homolog (LOC103630545), transcript variant X1, mRNA	1622	64.25	1435	0	1704		XM_004249282.3	transcription elongation factor SPT6-like (LOC101250941), transcript variant X1, mRNA	1642	68.25	1455	0	1865		XM_010655357.2	transcription elongation factor SPT6 homolog (LOC100241331), mRNA	1669	71.22	1515	0	2060		XM_020567728.1	transcription elongation factor SPT6 homolog (LOC18769649), mRNA	1631	69.46	1506	0	1995
	UN000277	XM_020672234.1	protein TSS (LOC18442378), transcript variant X1, mRNA	1913	75.64	895	0	1341		XM_009391679.2	protein TSS (LOC103976473), transcript variant X1, mRNA	1970	74.78	916	0	1338		XM_008648165.2	protein TSS (LOC103627850), mRNA	1764	65.97	911	0	1142		XM_019210848.1	protein TSS-like (LOC101251035), transcript variant X3, mRNA	1892	73.43	907	0	1296		XM_002278334.4	protein TSS (LOC100263581), transcript variant X3, mRNA	1870	76.73	898	0	1353		XM_007220376.2	protein TSS (LOC18785697), mRNA	1862	77.26	897	0	1316
	UN000278	XM_020662345.1	uncharacterized LOC18421752 (LOC18421752), mRNA	1620	74.05	1638	0	2362		XM_009422156.2	uncharacterized LOC104000174 (LOC104000174), mRNA	1671	76.87	1630	0	2422		NM_001176656.1	NM_001176656.1 length 415 aa, 1248 bp, from 26..1273 of NM_001176656.1 Zea mays uncharacterized LOC100384052 (LOC100384052), mRNA	415	70.84	415	0	600		XM_010317848.2	uncharacterized LOC101247774 (LOC101247774), mRNA	1611	73.83	1639	0	2363		XM_010649042.2	uncharacterized LOC104878506 (LOC104878506), mRNA	1373	73.9	1387	0	1936		XM_020567828.1	uncharacterized LOC18771467 (LOC18771467), mRNA	1623	76.06	1633	0	2399
	UN000279	XM_020675605.1	sister chromatid cohesion protein PDS5 homolog A (LOC18447633), transcript variant X2, mRNA	1614	62.52	1222	0	1462		XM_009419093.2	sister chromatid cohesion protein PDS5 homolog A-like (LOC103997765), transcript variant X1, mRNA	1594	65.71	1219	0	1562		XM_020539482.1	sister chromatid cohesion protein PDS5 homolog A (LOC103631385), transcript variant X1, mRNA	1695	56.92	1193	0	1309		XM_010314463.2	sister chromatid cohesion protein PDS5 homolog A-A (LOC101266989), transcript variant X2, mRNA	1668	63	1200	0	1487		XM_019218556.1	sister chromatid cohesion protein PDS5 homolog B (LOC100853350), mRNA	1256	67.11	1216	0	1631		XM_020562186.1	sister chromatid cohesion protein PDS5 homolog A (LOC18778842), mRNA	1752	68.46	1205	0	1632
	UN000281	XM_011624367.2	phospholipid-transporting ATPase 1 (LOC18432346), transcript variant X1, mRNA	1370	73.61	1277	0	1830		XM_009388650.2	phospholipid-transporting ATPase 1 (LOC103973949), transcript variant X1, mRNA	1362	76.12	1231	0	1828		XM_008660529.2	uncharacterized LOC100304270 (LOC100304270), transcript variant X1, mRNA	1306	70.86	1249	0	1715		XM_004248982.3	phospholipid-transporting ATPase 1-like (LOC101260883), transcript variant X1, mRNA	1324	74.14	1187	0	1720		XM_019221669.1	phospholipid-transporting ATPase 1 (LOC100244740), mRNA	1199	76.49	1225	0	1826		XM_020565623.1	phospholipid-transporting ATPase 1 (LOC18775374), transcript variant X1, mRNA	1291	76.03	1235	0	1852
	UN000282	XM_020666640.1	uncharacterized LOC18433514 (LOC18433514), transcript variant X4, mRNA	1388	29.12	546	5e-21	97.4		XM_018819568.1	uncharacterized LOC104000929 (LOC104000929), transcript variant X1, mRNA	1240	29.73	518	2e-23	105		---	---	0	---	---	---	---		XM_004237108.3	uncharacterized LOC101245151 (LOC101245151), transcript variant X1, mRNA	1214	35.09	228	4e-16	82		XM_010659841.2	uncharacterized LOC100854874 (LOC100854874), transcript variant X1, mRNA	1381	39.96	518	2e-69	242		XM_020558425.1	uncharacterized LOC18787245 (LOC18787245), mRNA	1328	34.43	517	1e-44	169
	UN000283	XM_020673480.1	myosin-6 (LOC18444199), mRNA	1478	81.2	1479	0	2459		XM_009394532.2	myosin-6-like (LOC103978661), transcript variant X4, mRNA	1518	79.14	1520	0	2417		NM_001349815.1	NM_001349815.1 length 1530 aa, 4593 bp, from 391..4983 of NM_001349815.1 Zea mays uncharacterized LOC100126801 (cl1510_1a), mRNA	1530	75.59	1520	0	2316		XM_004247072.3	myosin-6-like (LOC101267840), mRNA	1514	77.46	1522	0	2403		XM_002268063.3	myosin-6 (LOC100256590), mRNA	1520	80.24	1518	0	2484		XM_020570018.1	myosin-6 (LOC18766430), mRNA	1511	79.25	1518	0	2450
	UN000284	XM_020664328.1	protein CHROMATIN REMODELING 35 (LOC18429329), transcript variant X7, mRNA	950	61.8	678	0	837		XM_018828136.1	protein CHROMATIN REMODELING 35-like (LOC103986954), transcript variant X9, mRNA	999	55.74	1010	0	1049		XM_008664668.2	protein CHROMATIN REMODELING 35 (LOC103641317), transcript variant X3, mRNA	967	49.38	883	0	808		XM_004230822.3	protein CHROMATIN REMODELING 35 (LOC101266874), mRNA	944	63.27	697	0	851		XM_019218912.1	protein CHROMATIN REMODELING 35 (LOC100248561), transcript variant X3, mRNA	903	65.69	714	0	939		XM_007201353.2	protein CHROMATIN REMODELING 35 (LOC18766904), transcript variant X1, mRNA	895	65.62	704	0	925
	UN000286	XM_006843433.3	uncharacterized LOC18433340 (LOC18433340), transcript variant X1, mRNA	1548	59.68	1069	0	1073		XM_009382778.2	uncharacterized LOC103969284 (LOC103969284), mRNA	1497	60.06	1054	0	1096		XM_008661438.2	uncharacterized LOC103638559 (LOC103638559), transcript variant X1, mRNA	1447	55.88	1054	0	974		XM_004246058.3	uncharacterized LOC101258177 (LOC101258177), transcript variant X1, mRNA	1505	55.03	1074	0	986		XM_010660110.2	uncharacterized LOC100260315 (LOC100260315), transcript variant X1, mRNA	1533	61.5	1096	0	1152		XM_020563841.1	uncharacterized LOC18775978 (LOC18775978), transcript variant X2, mRNA	1393	62.54	1057	0	1143
	UN000287	XM_011625975.2	ethylene-insensitive protein 2 (LOC18995801), transcript variant X4, mRNA	1294	49.46	1308	0	1015		XM_009410248.2	protein ETHYLENE-INSENSITIVE 2-like (LOC103990941), transcript variant X1, mRNA	1281	48.52	1286	0	1056		XM_008675294.2	protein ETHYLENE-INSENSITIVE 2 (LOC103649560), transcript variant X4, mRNA	1273	44.76	1289	0	931		XM_010327408.2	ethylene signaling protein (EIN2), transcript variant X1, mRNA	1316	47.63	1310	0	1016		XM_010655283.2	ethylene-insensitive protein 2 (LOC100256742), transcript variant X1, mRNA	1326	52.66	1314	0	1162		XM_020567021.1	ethylene-insensitive protein 2 (LOC18773117), transcript variant X4, mRNA	1312	49.85	1308	0	1075
	UN000288	XM_020664753.1	probable phosphoinositide phosphatase SAC9 (LOC18430145), transcript variant X3, mRNA	1577	78.52	461	0	766		XM_009416427.2	probable phosphoinositide phosphatase SAC9 (LOC103995746), mRNA	1727	72.25	472	0	699		XM_008678628.2	putative phosphoinositide phosphatase SAC9 (si618006e06), transcript variant X1, mRNA	1624	68.39	465	0	670		XM_004244909.3	probable phosphoinositide phosphatase SAC9 (LOC101268595), transcript variant X1, mRNA	1620	75.64	472	0	781		XM_010652419.2	probable phosphoinositide phosphatase SAC9 (LOC100250760), transcript variant X1, mRNA	1642	81.02	469	0	825		XM_020569188.1	probable phosphoinositide phosphatase SAC9 (LOC18771259), transcript variant X1, mRNA	1637	76.55	469	0	778
	UN000295	XM_006844546.3	uncharacterized LOC18434476 (LOC18434476), mRNA	1684	42.9	732	5e-116	402		XM_009387167.2	uncharacterized LOC103972804 (LOC103972804), transcript variant X1, mRNA	1670	39.29	705	1e-108	381		NM_001331175.1	NM_001331175.1 length 1587 aa, 4764 bp, from 125..4888 of NM_001331175.1 Zea mays GYF domain-containing protein (LOC100280040), mRNA	1587	39.4	632	1e-79	291		XM_010322720.2	uncharacterized LOC101253285 (LOC101253285), transcript variant X2, mRNA	1593	38.54	1557	0	662		XM_010658657.2	uncharacterized LOC100254102 (LOC100254102), mRNA	1618	42.43	1532	0	832		XM_020554342.1	uncharacterized LOC18789795 (LOC18789795), mRNA	1633	41.29	712	9e-127	433
	UN000296	XM_011630703.2	uncharacterized LOC18424452 (LOC18424452), transcript variant X1, mRNA	1483	39.97	578	4e-52	202		XM_009393724.2	uncharacterized LOC103977992 (LOC103977992), transcript variant X1, mRNA	1332	40.43	517	4e-44	176		XM_008680356.2	Dentin sialophosphoprotein (LOC103653460), mRNA	1451	36.32	190	6e-13	75.1		XM_004237108.3	uncharacterized LOC101245151 (LOC101245151), transcript variant X1, mRNA	1214	34.06	138	6e-07	54.7		XM_010659914.2	uncharacterized LOC104881089 (LOC104881089), transcript variant X1, mRNA	1287	40.74	405	2e-43	174		XM_020558004.1	uncharacterized LOC18787236 (LOC18787236), transcript variant X1, mRNA	1331	35.11	188	8e-13	73.9
	UN000297	XM_011624599.2	myosin-17 (LOC18433010), transcript variant X3, mRNA	1529	86.09	1531	0	2673		XM_009402253.2	myosin-17-like (LOC103984701), transcript variant X5, mRNA	1530	85.73	1528	0	2650		NM_001111455.1	NM_001111455.1 length 1555 aa, 4668 bp, from 297..4964 of NM_001111455.1 Zea mays myosin 1 (myo1), mRNA	1555	81.22	1528	0	2489		XM_010325721.2	myosin-17-like (LOC101259860), mRNA	1541	84.42	1528	0	2569		XM_010656208.2	myosin-17 (LOC100266890), transcript variant X1, mRNA	1547	87.59	1531	0	2682		XM_007203918.2	myosin-17 (LOC18769229), mRNA	1530	85.72	1527	0	2626
	UN000298	XM_020664753.1	probable phosphoinositide phosphatase SAC9 (LOC18430145), transcript variant X3, mRNA	1577	78.52	461	0	766		XM_009416427.2	probable phosphoinositide phosphatase SAC9 (LOC103995746), mRNA	1727	72.25	472	0	699		XM_008678628.2	putative phosphoinositide phosphatase SAC9 (si618006e06), transcript variant X1, mRNA	1624	68.39	465	0	670		XM_004244909.3	probable phosphoinositide phosphatase SAC9 (LOC101268595), transcript variant X1, mRNA	1620	75.64	472	0	781		XM_010652419.2	probable phosphoinositide phosphatase SAC9 (LOC100250760), transcript variant X1, mRNA	1642	81.02	469	0	825		XM_020569188.1	probable phosphoinositide phosphatase SAC9 (LOC18771259), transcript variant X1, mRNA	1637	76.55	469	0	778
	UN000299	XM_006828106.3	protein SCAR2 (LOC18423505), transcript variant X1, mRNA	1639	60.3	267	5e-93	299		XM_009402688.2	SCAR-like protein 1 (LOC103985074), mRNA	1680	60.38	260	2e-95	306		XM_008674158.2	uncharacterized LOC100279190 (LOC100279190), transcript variant X3, mRNA	2091	72.46	167	8e-82	268		XM_010327477.2	protein SCAR2 (LOC101259665), transcript variant X2, mRNA	1707	65.04	266	2e-105	335		XM_010655071.2	protein SCAR2 (LOC100251663), mRNA	1687	67.67	266	4e-109	345		XM_020565516.1	protein SCAR2 (LOC18773969), transcript variant X2, mRNA	1620	69.17	266	1e-111	352
	UN000300	XM_020662961.1	homeobox-DDT domain protein RLT3 (LOC18427243), transcript variant X1, mRNA	1195	49.79	1207	0	940		XM_009420495.2	homeobox-DDT domain protein RLT3 (LOC103998887), mRNA	1185	53.22	1210	0	1035		XM_008667402.2	homeobox-DDT domain protein RLT3 (LOC103644204), transcript variant X2, mRNA	1174	46.29	1199	0	832		XM_004250411.3	homeobox-DDT domain protein RLT3 (LOC101266687), transcript variant X1, mRNA	1080	48.38	1081	0	872		XM_010646835.2	homeobox-DDT domain protein RLT3 (LOC100241125), transcript variant X3, mRNA	1187	54.44	1216	0	1126		XM_020559787.1	homeobox-DDT domain protein RLT3 (LOC18783218), transcript variant X2, mRNA	1137	52.51	1175	0	1057
	UN000302	XM_006854762.3	ferredoxin-dependent glutamate synthase, chloroplastic (LOC18444596), mRNA	1630	85.22	1610	0	2874		XM_009391358.2	ferredoxin-dependent glutamate synthase, chloroplastic (LOC103976157), mRNA	1624	86.4	1610	0	2892		NM_001112223.1	NM_001112223.1 length 1616 aa, 4851 bp, from 328..5178 of NM_001112223.1 Zea mays ferredoxin-dependent glutamate synthase 1 (fgs1), mRNA	1616	85.09	1529	0	2754		XM_004234782.3	ferredoxin-dependent glutamate synthase, chloroplastic (LOC101246028), mRNA	1621	83.97	1609	0	2836		XM_002267020.3	ferredoxin-dependent glutamate synthase, chloroplastic (LOC100233082), mRNA	1629	86.02	1610	0	2908		XM_007203000.2	ferredoxin-dependent glutamate synthase, chloroplastic (LOC18770391), mRNA	1636	85.47	1631	0	2904
	UN000303	XM_011630342.2	UDP-glucose:glycoprotein glucosyltransferase (LOC18448413), mRNA	1663	73.43	1626	0	2438		XM_009402529.2	UDP-glucose:glycoprotein glucosyltransferase (LOC103984945), mRNA	1656	71.76	1597	0	2372		XM_020538731.1	UDP-glucose:glycoprotein glucosyltransferase (LOC103627875), mRNA	1611	67.44	1597	0	2178		XM_004230438.3	UDP-glucose:glycoprotein glucosyltransferase (LOC101252027), transcript variant X1, mRNA	1656	69.02	1617	0	2296		XM_010659381.2	UDP-glucose:glycoprotein glucosyltransferase (LOC100256709), transcript variant X1, mRNA	1642	74.94	1616	0	2456		XM_007227306.2	UDP-glucose:glycoprotein glucosyltransferase (LOC18790702), transcript variant X1, mRNA	1626	73.12	1611	0	2417
	UN000304	XM_020664584.1	chromatin structure-remodeling complex protein SYD (LOC18429767), transcript variant X1, mRNA	2013	81.4	946	0	1491		XM_009404868.2	uncharacterized LOC103986774 (LOC103986774), transcript variant X1, mRNA	4041	77.97	1017	0	1532		XM_008649930.2	uncharacterized LOC100383943 (umc1614), transcript variant X1, mRNA	3828	65.41	1269	0	1481		XM_010314912.1	chromatin structure-remodeling complex protein SYD (LOC101247785), transcript variant X6, mRNA	3281	66.27	1254	0	1478		XM_010651496.2	chromatin structure-remodeling complex protein SYD (LOC100254600), transcript variant X3, mRNA	3713	82.67	958	0	1501		XM_020563259.1	chromatin structure-remodeling complex protein SYD (LOC18791851), mRNA	4011	67.57	1286	0	1535
	UN000305	XM_011630083.2	SNC1 1 (LOC18447812), mRNA	1678	33.51	1549	2e-128	440		XM_009409720.2	protein MODIFIER OF SNC1 1 (LOC103990538), transcript variant X1, mRNA	1566	31.29	1716	5e-141	475		XM_008662300.2	protein MODIFIER OF SNC1 1 (LOC103639563), transcript variant X1, mRNA	1502	31.87	1230	3e-77	284		XM_004236181.3	protein MODIFIER OF SNC1 1 (LOC101257353), mRNA	1581	32.35	1700	2e-126	433		XM_010664836.2	protein MODIFIER OF SNC1 1 (LOC104882280), transcript variant X2, mRNA	1615	37.9	1686	0	681		XM_020564933.1	protein MODIFIER OF SNC1 1 (LOC18776699), mRNA	1677	41.98	860	2e-110	387
	UN000306	XM_020669472.1	probable lysine-specific demethylase ELF6 (LOC18422781), transcript variant X5, mRNA	1725	59.76	410	5e-146	465		XM_009383866.2	probable lysine-specific demethylase ELF6 (LOC103970194), mRNA	1602	61.34	419	1e-157	495		XM_008660550.2	putative lysine-specific demethylase ELF6 (LOC100381553), transcript variant X2, mRNA	1494	52.08	649	0	609		XM_010321302.2	probable lysine-specific demethylase ELF6 (LOC101266411), mRNA	1355	57.37	692	0	682		XM_010660090.2	probable lysine-specific demethylase ELF6 (LOC100256547), transcript variant X2, mRNA	1520	65.53	673	0	758		XM_020556975.1	probable lysine-specific demethylase ELF6 (LOC18785455), mRNA	1556	62.78	669	0	744
	UN000307	XM_020671888.1	protein SHORTAGE IN CHIASMATA 1 (LOC18422903), transcript variant X8, mRNA	1614	41.08	1020	0	658		XM_009405573.2	uncharacterized LOC103987278 (LOC103987278), transcript variant X2, mRNA	1644	41.13	1043	0	720		XM_020538622.1	protein SHORTAGE IN CHIASMATA 1 (LOC103627474), transcript variant X5, mRNA	1689	46.18	340	4e-81	290		XM_019212603.1	uncharacterized LOC101266605 (LOC101266605), mRNA	1718	50.44	339	1e-90	318		XM_019226178.1	uncharacterized LOC104882205 (LOC104882205), transcript variant X4, mRNA	1491	43.11	1023	0	706		XM_020556391.1	protein SHORTAGE IN CHIASMATA 1 (LOC18786822), mRNA	1349	51.7	352	7e-91	317
	UN000308	XM_011623262.2	protein RNA-directed DNA methylation 3 (LOC18429362), transcript variant X2, mRNA	1712	42.49	772	8e-168	535		XM_009411609.2	protein RNA-directed DNA methylation 3 (LOC103992039), transcript variant X2, mRNA	1808	40.35	912	5e-171	546		XM_008658209.2	Protein RNA-directed DNA methylation 3 (LOC103635834), transcript variant X1, mRNA	1625	38.88	1016	8e-173	548		XM_010314293.1	protein RNA-directed DNA methylation 3 (LOC101254655), transcript variant X2, mRNA	1613	50.45	557	7e-171	541		XM_019224316.1	protein RNA-directed DNA methylation 3 (LOC100256388), transcript variant X4, mRNA	1718	41.39	1109	0	658		XM_020557016.1	protein RNA-directed DNA methylation 3 (LOC18784806), mRNA	1717	51.55	355	6e-105	360
	UN000309	XM_020669146.1	putative ABC transporter C family member 15 (LOC18437391), mRNA	1536	70.9	1512	0	1985		XM_018820738.1	putative ABC transporter C family member 15 (LOC103972645), transcript variant X1, mRNA	1522	68.37	1511	0	1997		XM_008670752.2	putative ABC transporter C family member 15 (LOC103646012), transcript variant X1, mRNA	1540	65.33	1517	0	1882		XM_004248492.3	putative ABC transporter C family member 15 (LOC101262754), transcript variant X1, mRNA	1491	69.87	1437	0	1945		XM_010663142.2	putative ABC transporter C family member 15 (LOC100259790), mRNA	1510	74.39	1511	0	2153		XM_007220346.2	putative ABC transporter C family member 15 (LOC18784723), mRNA	1517	72.22	1512	0	2112
	UN000310	XM_020663911.1	uncharacterized LOC18428793 (LOC18428793), transcript variant X8, mRNA	1285	67.15	834	0	1042		XM_009394523.2	uncharacterized LOC103978659 (LOC103978659), transcript variant X1, mRNA	1626	68.67	830	0	1110		XM_020539335.1	uncharacterized LOC100278145 (LOC100278145), transcript variant X6, mRNA	1269	59.76	835	0	892		XM_010327244.2	uncharacterized LOC101252827 (LOC101252827), transcript variant X1, mRNA	1582	68.19	830	0	1066		XM_010663010.2	uncharacterized LOC100265029 (LOC100265029), transcript variant X1, mRNA	1613	71.2	830	0	1159		XM_020556761.1	uncharacterized LOC18784912 (LOC18784912), transcript variant X1, mRNA	1570	67.91	829	0	1062
	UN000312	XM_011627070.2	myosin-15 (LOC18439453), mRNA	1521	74.62	1521	0	2261		XM_009393186.2	myosin-15 (LOC103977620), transcript variant X1, mRNA	1517	74.27	1516	0	2240		XM_008681042.2	protein OPAQUE1 (LOC103654209), mRNA	1520	70.25	1516	0	2093		XM_004244994.3	myosin-15 (LOC101265848), transcript variant X2, mRNA	1535	75.91	1515	0	2285		XM_002281579.4	myosin-15 (LOC100254166), mRNA	1522	79.07	1519	0	2368		XM_020561637.1	myosin-15 (LOC18792791), transcript variant X1, mRNA	1513	77.23	1515	0	2325
	UN000314	XM_011626396.2	trithorax group protein osa-like (LOC18437784), mRNA	1627	39.89	351	3e-47	172		XM_009404029.2	AT-rich interactive domain-containing protein 1A (LOC103986128), transcript variant X1, mRNA	1602	62.82	78	3e-25	108		NM_001176746.1	NM_001176746.1 length 379 aa, 1140 bp, from 1..1140 of NM_001176746.1 Zea mays uncharacterized LOC100384168 (LOC100384168), mRNA	379	60	50	1e-14	75.5		XM_019215636.1	protein piccolo-like (LOC101249008), transcript variant X2, mRNA	1353	33.91	404	2e-29	119		XM_002279940.4	chromatin modification-related protein eaf-1 (LOC100250222), transcript variant X2, mRNA	1669	43.22	398	5e-59	206		XM_020567521.1	uncharacterized LOC18772151 (LOC18772151), transcript variant X1, mRNA	1356	38.77	374	5e-45	166
	UN000316	XM_020666962.1	protein PHYLLO, chloroplastic (LOC18433994), transcript variant X8, mRNA	1362	57.82	358	1e-117	405		XM_009408960.2	protein PHYLLO, chloroplastic (LOC103989974), transcript variant X3, mRNA	1730	52.32	367	7e-112	393		XM_020537474.1	uncharacterized LOC100384334 (LOC100384334), transcript variant X2, mRNA	1389	49.86	361	2e-98	348		XM_019213223.1	protein PHYLLO, chloroplastic (LOC101245351), transcript variant X4, mRNA	1380	45.77	402	7e-92	328		XM_010655926.2	protein PHYLLO, chloroplastic (LOC100241089), transcript variant X4, mRNA	1594	54.86	370	1e-115	402		XM_020555343.1	protein PHYLLO, chloroplastic (LOC18791507), transcript variant X6, mRNA	1368	55	360	8e-119	408
	UN000319	XM_006857107.3	FIP1[V]-like protein (LOC18447005), mRNA	1406	47.13	1324	0	843		XM_009413061.2	FIP1[V]-like protein (LOC103993109), mRNA	1430	41.97	1308	0	709		XM_020537880.1	FIP1[V]-like protein (LOC103625923), transcript variant X1, mRNA	1327	38	1263	7e-169	538		XM_004242523.3	FIP1[V]-like protein (LOC101261244), mRNA	1380	40.46	1305	0	612		XM_010658302.2	FIP1[V]-like protein (LOC100251960), mRNA	1479	48.35	1365	0	936		XM_007204621.2	FIP1[V]-like protein (LOC18769501), transcript variant X1, mRNA	1369	49.15	1300	0	874
	UN000321	XM_020664782.1	tropomyosin (LOC18430094), transcript variant X5, mRNA	401	74.47	333	2e-142	408		XM_009384185.2	cingulin-like protein 1 (LOC103970415), mRNA	347	70.12	328	2e-141	404		NM_001155634.1	NM_001155634.1 length 348 aa, 1047 bp, from 522..1568 of NM_001155634.1 Zea mays plant IF-like protein (LOC100282727), mRNA	348	67.27	330	1e-134	387		XM_004230307.3	myosin-11 (LOC101263162), transcript variant X1, mRNA	337	74.62	327	3e-153	433		XM_002276603.4	myosin heavy chain, cardiac muscle isoform (LOC100259639), mRNA	377	80.61	330	4e-168	473		XM_020566803.1	protein SGM1 (LOC18775226), transcript variant X1, mRNA	356	77.27	330	7e-156	441
	UN000322	---	---	0	---	---	---	---		---	---	0	---	---	---	---		XM_020546264.1	NAD(P)H-quinone oxidoreductase subunit 2 B, chloroplastic (LOC109943316), partial mRNA	508	30.7	114	1e-07	54.7		---	---	0	---	---	---	---		---	---	0	---	---	---	---		---	---	0	---	---	---	---
	UN000324	XM_006878591.3	pentatricopeptide repeat-containing protein At3g18110, chloroplastic (LOC18422694), transcript variant X1, mRNA	1522	67.18	1310	0	1842		XM_009383337.2	pentatricopeptide repeat-containing protein At3g18110, chloroplastic (LOC103969707), transcript variant X1, mRNA	1468	68.91	1306	0	1873		XM_008660940.2	pentatricopeptide repeat-containing protein At3g18110, chloroplastic (LOC100277783), transcript variant X1, mRNA	1435	60.29	1307	0	1640		XM_010319965.2	pentatricopeptide repeat-containing protein At3g18110, chloroplastic (LOC101261209), transcript variant X1, mRNA	1475	64.7	1306	0	1791		XM_010663849.2	pentatricopeptide repeat-containing protein At3g18110, chloroplastic (LOC100252831), transcript variant X1, mRNA	1490	72.88	1298	0	1976		XM_020566467.1	pentatricopeptide repeat-containing protein At3g18110, chloroplastic (LOC18775386), transcript variant X1, mRNA	1525	68.96	1308	0	1909
	UN000325	XM_020673612.1	probable mitochondrial intermediate peptidase, mitochondrial (LOC18444248), transcript variant X1, mRNA	740	72.65	680	0	1056		XM_009400185.2	probable mitochondrial intermediate peptidase, mitochondrial (LOC103983048), transcript variant X1, mRNA	717	72.27	678	0	1049		XM_020537486.1	putative mitochondrial intermediate peptidase mitochondrial (LOC100384686), transcript variant X1, mRNA	693	67.46	676	0	984		XM_004234891.3	probable mitochondrial intermediate peptidase, mitochondrial (LOC101249800), transcript variant X1, mRNA	710	69.47	678	0	1013		XM_002265551.3	probable mitochondrial intermediate peptidase, mitochondrial (LOC100262804), mRNA	759	77.07	676	0	1105		XM_007220555.2	probable mitochondrial intermediate peptidase, mitochondrial (LOC18787218), transcript variant X1, mRNA	714	71.6	676	0	1038
	UN000326	XM_020670058.1	uncharacterized LOC18438588 (LOC18438588), transcript variant X1, mRNA	1639	42.7	1171	0	705		XM_009392892.2	uncharacterized LOC103977399 (LOC103977399), mRNA	1270	38.83	1401	0	733		XM_008660987.2	Protein kinase superfamily protein with octicosapeptide/Phox/Bem1p domain (LOC103637988), transcript variant X2, mRNA	1264	39.2	1357	0	730		XM_004242974.3	uncharacterized LOC101257085 (LOC101257085), mRNA	1415	47.92	1367	0	1038		XM_010658238.2	uncharacterized LOC100251651 (LOC100251651), transcript variant X1, mRNA	1425	51.28	1365	0	1144		XM_020567985.1	uncharacterized LOC18770775 (LOC18770775), transcript variant X1, mRNA	1469	49.49	1360	0	1088
	UN000328	XM_020663249.1	uncharacterized LOC18427595 (LOC18427595), transcript variant X1, mRNA	1691	48.56	1701	0	1156		XM_009393466.2	uncharacterized LOC103977832 (LOC103977832), mRNA	1673	51.26	1668	0	1337		XM_008660384.2	uncharacterized LOC103637703 (LOC103637703), transcript variant X2, mRNA	1613	56.26	775	0	746		XM_010320619.2	uncharacterized LOC101252674 (LOC101252674), transcript variant X3, mRNA	1602	57.27	805	0	824		XM_010664901.2	uncharacterized LOC100248456 (LOC100248456), mRNA	1644	51.78	1686	0	1394		XM_020559628.1	uncharacterized LOC18781735 (LOC18781735), transcript variant X1, mRNA	1635	48.95	1667	0	1288
	UN000330	XM_006838447.3	pentatricopeptide repeat-containing protein At4g17616 (LOC18429155), transcript variant X1, mRNA	784	50.67	667	0	627		XM_009403718.2	pentatricopeptide repeat-containing protein At4g17616 (LOC103985858), transcript variant X1, mRNA	710	54.37	640	0	665		XM_020546137.1	pentatricopeptide repeat-containing protein At4g17616 (LOC103642138), transcript variant X1, mRNA	694	43.88	645	1e-162	483		XM_019213613.1	pentatricopeptide repeat-containing protein At4g17616 (LOC101259433), transcript variant X4, mRNA	711	47.73	639	0	573		XM_010664398.2	pentatricopeptide repeat-containing protein At4g17616 (LOC100853585), mRNA	716	57.5	640	0	693		XM_020568654.1	pentatricopeptide repeat-containing protein At4g17616 (LOC18770834), transcript variant X1, mRNA	718	52.19	638	0	646
	UN000331	XM_020661861.1	phosphatidate phosphatase PAH2 (LOC18425103), mRNA	1421	52.4	250	8e-68	226		XM_009405735.2	phosphatidate phosphatase PAH2-like (LOC103987430), transcript variant X3, mRNA	1067	61.22	196	5e-77	252		XM_020552439.1	phosphatidate phosphatase PAH2 (LOC103652775), transcript variant X5, mRNA	1071	53.24	216	5e-68	227		XM_019213688.1	phosphatidate phosphatase PAH2-like (LOC101261812), transcript variant X2, mRNA	878	55.98	209	2e-65	218		XM_010666274.2	phosphatidate phosphatase PAH2 (LOC100266011), transcript variant X1, mRNA	1171	59.91	217	1e-74	246		XM_020570394.1	phosphatidate phosphatase PAH2 (LOC18793032), transcript variant X2, mRNA	819	54.59	218	5e-65	216
	UN000332	XM_006838224.3	protein OBERON 3 (LOC18428928), mRNA	1335	49.24	859	0	704		XM_009391263.2	protein OBERON 4-like (LOC103976077), mRNA	1336	50.3	823	0	708		XM_008662175.2	protein OBERON 4-like (LOC103639433), mRNA	1342	41.7	717	4e-165	525		XM_004229595.3	protein OBERON 4 (LOC101250443), mRNA	1201	45.44	1173	0	734		XM_002274260.3	protein OBERON 4 (LOC100248244), mRNA	1219	56.49	832	0	829		XM_020557628.1	protein OBERON 4 (LOC18787122), mRNA	1234	55.37	791	0	755
	UN000333	XM_006838843.3	ARF guanine-nucleotide exchange factor GNOM (LOC18429558), mRNA	1491	80.01	1441	0	2313		XM_009404950.2	ARF guanine-nucleotide exchange factor GNOM-like (LOC103986838), mRNA	1455	75.69	1456	0	2190		XM_008646391.2	ARF guanine-nucleotide exchange factor GNOM (LOC103626007), mRNA	1415	68.74	1449	0	1937		XM_010322610.2	ARF guanine-nucleotide exchange factor GNOM (LOC101259044), transcript variant X1, mRNA	1455	77.79	1441	0	2246		XM_010664942.2	ARF guanine-nucleotide exchange factor GNOM (LOC100247152), mRNA	1470	81.24	1439	0	2342		XM_007220517.2	ARF guanine-nucleotide exchange factor GNOM (LOC18785443), transcript variant X1, mRNA	1467	79.47	1442	0	2311
	UN000334	XM_011625658.2	LRR receptor-like serine/threonine-protein kinase RPK2 (LOC18435758), mRNA	1166	48.67	487	3e-114	382		XM_009410350.2	LRR receptor-like serine/threonine-protein kinase RPK2 (LOC103991006), transcript variant X1, mRNA	1207	59.44	429	4e-143	462		XM_008655106.2	LRR receptor-like serine/threonine-protein kinase RPK2 (LOC103633402), mRNA	1088	46.81	423	7e-103	350		NM_001279045.1	NM_001279045.1 length 1125 aa, 3378 bp, from 1..3378 of NM_001279045.1 Solanum lycopersicum LRR receptor-like serine/threonine-protein kinase RPK2-like (LOC101259816), mRNA	1125	53.57	420	3e-135	439		XM_010651499.2	LRR receptor-like serine/threonine-protein kinase RPK2 (LOC100854554), mRNA	1144	59.72	432	1e-162	513		XM_007217009.2	LRR receptor-like serine/threonine-protein kinase RPK2 (LOC18782245), transcript variant X1, mRNA	1147	55.38	446	6e-145	465
	UN000336	XM_011626763.2	endoribonuclease Dicer homolog 4 (LOC18438513), transcript variant X1, mRNA	1623	58.91	1453	0	1645		XM_018818223.1	endoribonuclease Dicer homolog 4 (LOC103998682), transcript variant X2, mRNA	1646	60.22	1478	0	1734		XM_020545124.1	uncharacterized LOC100381550 (LOC100381550), transcript variant X2, mRNA	1602	56.23	1501	0	1563		NM_001279281.2	NM_001279281.2 length 1620 aa, 4863 bp, from 101..4963 of NM_001279281.2 Solanum lycopersicum dicer-like protein 4 (DCL4), mRNA	1620	56.75	1445	0	1576		XM_002264450.4	dicer-like protein 4 (LOC100243116), transcript variant X2, mRNA	1670	60.08	1468	0	1691		XM_020569133.1	dicer-like protein 4 (LOC18771645), transcript variant X2, mRNA	1637	57.81	1479	0	1647
	UN000337	XM_006827512.3	mitogen-activated protein kinase kinase kinase YODA (LOC18422986), transcript variant X1, mRNA	903	64.68	923	0	851		XM_009399744.2	mitogen-activated protein kinase kinase kinase YODA-like (LOC103982741), transcript variant X5, mRNA	851	65.74	867	0	840		XM_008683013.2	Mitogen-activated protein kinase kinase kinase YODA (si606029c09(535)), transcript variant X1, mRNA	893	60.48	911	0	782		XM_004234372.3	mitogen-activated protein kinase kinase kinase YODA-like (LOC101258826), mRNA	890	64.9	906	0	856		XM_003631367.3	mitogen-activated protein kinase kinase kinase YODA (LOC100263296), mRNA	908	69.45	910	0	979		XM_007219501.2	mitogen-activated protein kinase kinase kinase YODA (LOC18784921), transcript variant X1, mRNA	902	67.55	909	0	931
	UN000338	XM_020661846.1	pleiotropic drug resistance protein TUR2 (LOC18425021), mRNA	1451	71.91	1463	0	2153		XM_009403531.2	ABC transporter G family member 36-like (LOC103985721), transcript variant X2, mRNA	1481	76.52	1461	0	2274		XM_008681639.2	ABC transporter G family member 39 (LOC103654816), mRNA	1443	73.93	1454	0	2186		XM_004245177.3	pleiotropic drug resistance protein 1-like (LOC101247843), mRNA	1453	72.76	1450	0	2207		XM_010650302.2	pleiotropic drug resistance protein 1 (LOC100250693), transcript variant X2, mRNA	1439	73.98	1453	0	2235		XM_020560690.1	pleiotropic drug resistance protein 1 (LOC18783732), mRNA	1454	72.52	1463	0	2139
	UN000339	XM_006857555.3	disease resistance protein RPM1 (LOC18447458), mRNA	911	30.46	732	2e-66	242		XM_009402049.2	putative disease resistance protein RGA1 (LOC103984535), mRNA	1148	33.3	1114	6e-152	486		XM_020539604.1	putative disease resistance protein RGA3 (LOC103631582), mRNA	1143	33.81	979	5e-146	470		XM_004235091.3	putative disease resistance RPP13-like protein 1 (LOC101244352), transcript variant X1, mRNA	1341	32.78	1260	4e-142	464		XM_019223986.1	putative disease resistance protein RGA1 (LOC100255136), transcript variant X2, mRNA	1110	37.97	977	2e-179	557		XM_020565468.1	putative disease resistance protein At3g14460 (LOC18773320), transcript variant X1, mRNA	1132	36.45	985	8e-153	488
	UN000340	XM_006854349.3	protein CHROMATIN REMODELING 20 (LOC18444171), transcript variant X1, mRNA	1585	52.4	458	3e-107	374		XM_018825092.1	protein CHROMATIN REMODELING 20 (LOC103982759), transcript variant X3, mRNA	1134	49.08	489	2e-96	337		NM_001138652.1	NM_001138652.1 length 338 aa, 1017 bp, from 274..1290 of NM_001138652.1 Zea mays chromatin complex subunit A (chr124), mRNA	338	64.59	209	6e-72	245		XM_010321526.2	protein CHROMATIN REMODELING 20 (LOC101246047), transcript variant X1, mRNA	1488	47.95	463	4e-87	313		XM_010661870.2	protein CHROMATIN REMODELING 20 (LOC100244360), transcript variant X3, mRNA	1505	54.75	484	1e-105	369		XM_020566073.1	protein CHROMATIN REMODELING 20 (LOC18774645), mRNA	1576	55.81	473	9e-114	393
	UN000341	XM_020676137.1	RNA polymerase II transcription subunit 23 (LOC18423869), transcript variant X1, mRNA	1590	72.17	1592	0	2177		XM_009393143.2	mediator of RNA polymerase II transcription subunit 23 (LOC103977584), mRNA	1575	74.5	1596	0	2281		NM_001350054.1	NM_001350054.1 length 1613 aa, 4842 bp, from 68..4909 of NM_001350054.1 Zea mays uncharacterized LOC100384269 (LOC100384269), mRNA	1613	73.68	1596	0	2188		XM_010322740.2	mediator of RNA polymerase II transcription subunit 23 (LOC101257965), transcript variant X1, mRNA	1608	69.99	1593	0	2158		XM_010654984.2	mediator of RNA polymerase II transcription subunit 23 (LOC100262719), transcript variant X4, mRNA	1600	74.58	1593	0	2247		XM_007225413.2	mediator of RNA polymerase II transcription subunit 23 (LOC18792109), transcript variant X1, mRNA	1645	74.23	1595	0	2315
	UN000343	XM_020670847.1	histone-lysine N-methyltransferase ATXR7 (LOC18439661), transcript variant X6, mRNA	1317	45.74	129	2e-24	112		XM_018821575.1	histone-lysine N-methyltransferase ATXR7 (LOC103973775), transcript variant X1, mRNA	1347	39.29	140	5e-20	97.8		XM_020545652.1	histone-lysine N-methyltransferase ATXR7 (LOC103642258), transcript variant X9, mRNA	1169	35.65	115	4e-12	72		XM_019213745.1	histone-lysine N-methyltransferase ATXR7 (LOC101263241), transcript variant X6, mRNA	1725	50.34	145	2e-34	144		XM_019218466.1	histone-lysine N-methyltransferase ATXR7 (LOC104878403), mRNA	1307	67.26	113	3e-40	163		XM_020556748.1	histone-lysine N-methyltransferase ATXR7 (LOC18785225), mRNA	1129	76.25	80	9e-33	138
	UN000344	XM_006836306.3	leucine-rich repeat receptor-like serine/threonine-protein kinase At1g17230 (LOC18427253), transcript variant X1, mRNA	1107	71.34	1078	0	1318		XM_018824341.1	leucine-rich repeat receptor-like serine/threonine-protein kinase At1g17230 (LOC103982498), transcript variant X2, mRNA	1146	72.4	1069	0	1340		XM_020540938.1	leucine-rich repeat receptor-like serine/threonine-protein kinase At1g17230 (LOC109940759), transcript variant X1, mRNA	1105	64.02	1070	0	1200		XM_004243150.3	leucine-rich repeat receptor-like serine/threonine-protein kinase At1g17230 (LOC101246069), transcript variant X1, mRNA	1111	65.85	1057	0	1217		XM_002262965.3	leucine-rich repeat receptor-like serine/threonine-protein kinase At1g17230 (LOC100264502), mRNA	1111	71.99	1078	0	1332		XM_020562946.1	leucine-rich repeat receptor-like serine/threonine-protein kinase At1g17230 (LOC18778627), transcript variant X2, mRNA	1135	70.05	1045	0	1283
	UN000345	XM_020675633.1	uncharacterized LOC18447647 (LOC18447647), mRNA	1548	39.79	656	3e-41	164		XM_009397611.2	uncharacterized LOC103981036 (LOC103981036), mRNA	1631	35.18	904	1e-67	246		---	---	0	---	---	---	---		XM_010325951.2	uncharacterized LOC104648544 (LOC104648544), transcript variant X2, mRNA	1895	38.57	669	2e-41	166		XM_002265957.3	uncharacterized LOC100241254 (LOC100241254), mRNA	1763	36.5	926	3e-79	281		XM_020563963.1	uncharacterized LOC18776252 (LOC18776252), mRNA	1650	36.07	671	1e-53	203
	UN000346	XM_020675807.1	protein WEAK CHLOROPLAST MOVEMENT UNDER BLUE LIGHT 1 (LOC18423744), transcript variant X2, mRNA	967	62.23	699	0	558		XM_009405741.2	protein WEAK CHLOROPLAST MOVEMENT UNDER BLUE LIGHT 1 (LOC103987433), transcript variant X3, mRNA	866	56.55	824	0	572		NM_001165871.1	NM_001165871.1 length 784 aa, 2355 bp, from 1..2355 of NM_001165871.1 Zea mays Putative paramyosin (cl37738_1), mRNA	784	54.28	643	4e-142	439		XM_004242905.3	protein WEAK CHLOROPLAST MOVEMENT UNDER BLUE LIGHT 1 (LOC101257678), transcript variant X1, mRNA	887	65.77	666	0	570		XM_002282734.4	protein WEAK CHLOROPLAST MOVEMENT UNDER BLUE LIGHT 1 (LOC100260913), transcript variant X1, mRNA	844	68.6	707	0	640		XM_007225265.2	protein WEAK CHLOROPLAST MOVEMENT UNDER BLUE LIGHT 1 (LOC18788765), mRNA	916	70.55	652	0	615
	UN000347	XM_006847148.3	DNA (cytosine-5)-methyltransferase 1B (LOC18436927), mRNA	1620	70.67	832	0	1221		XM_018824243.1	DNA (cytosine-5)-methyltransferase 1B-like (LOC103982991), mRNA	1611	67.68	1519	0	2045		XM_008653886.2	DNA (cytosine-5)-methyltransferase 1B (LOC103632028), transcript variant X8, mRNA	1554	64.4	1500	0	1915		NM_001247819.2	NM_001247819.2 length 1562 aa, 4689 bp, from 534..5222 of NM_001247819.2 Solanum lycopersicum DNA (cytosine-5)-methyltransferase (MET), mRNA	1562	66.64	1529	0	2030		XM_002267164.3	DNA (cytosine-5)-methyltransferase 1 (LOC100251127), mRNA	1549	71.09	1529	0	2140		XM_007203144.2	DNA (cytosine-5)-methyltransferase 1 (LOC18771792), mRNA	1567	67.65	1521	0	2056
	UN000348	XM_020662523.1	ATP synthase subunit a-like (LOC110006549), mRNA	311	61.51	252	3e-74	228		XM_009388250.2	ATP synthase subunit a (LOC103973622), mRNA	329	78.97	252	4e-100	295		XM_020552364.1	ATP synthase subunit a (LOC109945965), mRNA	227	85.35	198	8e-98	286		---	---	0	---	---	---	---		---	---	0	---	---	---	---		---	---	0	---	---	---	---
	UN000349	XM_011622980.2	uncharacterized LOC18428491 (LOC18428491), transcript variant X1, mRNA	2019	64.35	1571	0	1962		XM_009413281.2	vacuolar protein sorting-associated protein 8 homolog (LOC103993268), transcript variant X1, mRNA	1945	63.2	1557	0	1921		XM_008682890.2	transducin family protein / WD-40 repeat family protein (si618080f12(37)), transcript variant X1, mRNA	1916	55.35	1570	0	1605		XM_004240248.3	vacuolar protein sorting-associated protein 8 homolog (LOC101260644), transcript variant X1, mRNA	1908	54.29	1610	0	1609		XM_002267590.4	vacuolar protein sorting-associated protein 8 homolog (LOC100242137), transcript variant X1, mRNA	2004	68.91	1621	0	2098		XM_020556889.1	vacuolar protein sorting-associated protein 8 homolog (LOC18785420), transcript variant X1, mRNA	1920	65.62	1568	0	1951
	UN000350	XM_020670661.1	DNA-directed RNA polymerase I subunit 1 (LOC18439963), transcript variant X1, mRNA	1600	67.13	998	0	1350		XM_009409428.2	DNA-directed RNA polymerase I subunit 1-like (LOC103990331), mRNA	1640	60.82	1419	0	1625		XM_008657154.2	DNA-directed RNA polymerase I subunit 1 (LOC100279825), transcript variant X3, mRNA	1509	52.32	1468	0	1399		XM_004249710.2	DNA-directed RNA polymerase I subunit 1 (LOC101260591), mRNA	1677	54.75	1346	0	1421		XM_010655500.2	DNA-directed RNA polymerase I subunit 1 (LOC100250406), mRNA	1714	60.82	1460	0	1671		XM_020568393.1	DNA-directed RNA polymerase I subunit 1 (LOC18769224), mRNA	1720	55.17	1412	0	1474
	UN000351	XM_020675246.1	ABC transporter C family member 13 (LOC18447078), transcript variant X3, mRNA	1494	64.62	1484	0	1873		XM_018826573.1	ABC transporter C family member 13 (LOC103985184), transcript variant X1, mRNA	1270	71.16	1269	0	1749		XM_008660967.2	ABC transporter C family member 13 (LOC103637972), transcript variant X1, mRNA	1464	60.13	1485	0	1669		XM_004236397.2	ABC transporter C family member 13 (LOC101250391), transcript variant X1, mRNA	1464	62.57	1488	0	1772		XM_010656784.2	ABC transporter C family member 13 (LOC100251858), transcript variant X3, mRNA	1485	69.05	1480	0	1974		XM_020558794.1	ABC transporter C family member 13 (LOC18784185), transcript variant X1, mRNA	1557	68.85	1483	0	1943
	UN000353	XM_006829781.3	uncharacterized LOC18425215 (LOC18425215), mRNA	1413	72.17	1085	0	1600		XM_018829178.1	helicase sen1 (LOC103993084), transcript variant X4, mRNA	1381	69.49	1321	0	1818		NM_001323891.1	NM_001323891.1 length 1417 aa, 4254 bp, from 369..4622 of NM_001323891.1 Zea mays P-loop containing nucleoside triphosphate hydrolase superfamily protein (LOC100502266), mRNA	1417	62.6	1369	0	1637		XM_010321856.2	probable helicase senataxin (LOC101247908), transcript variant X3, mRNA	1387	68.8	1327	0	1776		XM_010666006.2	uncharacterized ATP-dependent helicase C29A10.10c (LOC100255680), transcript variant X3, mRNA	1400	73.5	1332	0	1921		XM_007227020.2	uncharacterized LOC18792248 (LOC18792248), mRNA	1383	71.82	1327	0	1865
	UN000355	XM_020661932.1	MAG2-interacting protein 2 (LOC18421467), transcript variant X1, mRNA	2489	53.84	1746	0	1785		XM_009412803.2	MAG2-interacting protein 2 (LOC103992901), mRNA	2465	56.58	1725	0	1853		XM_008656182.2	MAG2-interacting protein 2 (LOC100193870), transcript variant X1, mRNA	2511	49.28	1747	0	1568		XM_019212653.1	MAG2-interacting protein 2 (LOC101256264), mRNA	2426	54.86	1697	0	1746		XM_019226146.1	MAG2-interacting protein 2 (LOC100258836), transcript variant X1, mRNA	2439	63.62	1696	0	2126		XM_020556310.1	MAG2-interacting protein 2 (LOC18785852), transcript variant X1, mRNA	2428	60.64	1692	0	2031
	UN000356	XM_020661722.1	uncharacterized LOC18424673 (LOC18424673), transcript variant X2, mRNA	1916	47.45	685	2e-159	513		XM_009393844.2	uncharacterized LOC103978145 (LOC103978145), mRNA	1728	41.68	907	5e-169	536		XM_020543928.1	uncharacterized LOC103638749 (LOC103638749), transcript variant X2, mRNA	2082	60.16	251	2e-90	317		XM_010321411.2	uncharacterized protein (LOC101244480), transcript variant X1, mRNA	1957	46.96	790	4e-179	567		XM_019216493.1	uncharacterized LOC100262507 (LOC100262507), transcript variant X2, mRNA	2219	51.41	957	0	774		XM_007221864.2	uncharacterized protein At1g21580 (LOC18792185), transcript variant X3, mRNA	2144	48.44	834	0	651
	UN000357	XM_006853372.3	myosin-11 (LOC18443179), mRNA	1459	43.56	962	2e-159	518		XM_009400978.2	sporulation-specific protein 15-like (LOC103983707), mRNA	1441	48.09	1414	0	1014		XM_020548133.1	myosin-11 (LOC103645943), mRNA	1874	35.68	611	2e-61	233		XM_004243596.3	myosin heavy chain, skeletal muscle (LOC101256605), mRNA	1511	54.83	704	0	587		XM_010649893.2	myosin-11 (LOC100256869), mRNA	1430	53.64	1441	0	1144		XM_020560661.1	myosin-9 (LOC18781799), mRNA	1376	54.6	1412	0	1165
	UN000359	XM_011629255.2	ATP-dependent RNA helicase DEAH12, chloroplastic (LOC18445601), mRNA	1703	58.52	1550	0	1804		XM_009415301.2	ATP-dependent RNA helicase DEAH12, chloroplastic-like (LOC103994858), transcript variant X1, mRNA	1720	59.59	1564	0	1843		XM_020541022.1	putative RNA helicase family protein (LOC103633431), mRNA	1803	56.47	1569	0	1758		XM_004250468.3	ATP-dependent RNA helicase DEAH11, chloroplastic-like (LOC101260893), mRNA	1779	58.02	1584	0	1827		XM_019221140.1	ATP-dependent RNA helicase DEAH11, chloroplastic (LOC100254070), mRNA	1762	62.91	1561	0	1977		XM_007208080.2	ATP-dependent RNA helicase DEAH12, chloroplastic (LOC18772014), mRNA	1724	59.27	1569	0	1856
	UN000360	XM_020670668.1	uncharacterized LOC18439698 (LOC18439698), transcript variant X2, mRNA	1427	44.44	324	2e-77	269		XM_009389507.2	uncharacterized LOC103974640 (LOC103974640), mRNA	1255	51.98	354	8e-103	339		XM_008654652.2	titin homolog (LOC103632943), transcript variant X2, mRNA	1316	45.67	300	2e-76	266		XM_010322426.2	reticulocyte-binding protein 2 homolog a (LOC101267704), transcript variant X3, mRNA	1491	48.03	356	8e-98	327		XM_010665736.2	microtubule-associated protein futsch (LOC100261635), transcript variant X1, mRNA	1394	57.07	396	5e-140	442		XM_007210364.2	uncharacterized LOC18777718 (LOC18777718), mRNA	1252	51.15	391	2e-120	386
	UN000361	XM_006844546.3	uncharacterized LOC18434476 (LOC18434476), mRNA	1684	45.61	888	3e-161	515		XM_009387167.2	uncharacterized LOC103972804 (LOC103972804), transcript variant X1, mRNA	1670	43.37	883	2e-147	478		NM_001331175.1	NM_001331175.1 length 1587 aa, 4764 bp, from 125..4888 of NM_001331175.1 Zea mays GYF domain-containing protein (LOC100280040), mRNA	1587	42.17	792	2e-107	366		XM_010322718.2	uncharacterized LOC101248198 (LOC101248198), transcript variant X2, mRNA	1612	41.41	739	5e-111	375		XM_010662426.2	uncharacterized LOC100256726 (LOC100256726), transcript variant X2, mRNA	1641	47.82	939	0	604		XM_020554342.1	uncharacterized LOC18789795 (LOC18789795), mRNA	1633	43.32	965	2e-167	531
	UN000362	XM_006856640.3	kinesin-like protein KIN-7E, chloroplastic (LOC18446524), transcript variant X3, mRNA	1139	73.1	1067	0	1355		XM_009385251.2	kinesin-like protein KIN-7E, chloroplastic (LOC103971265), transcript variant X1, mRNA	1159	72.13	1062	0	1364		XM_008671172.2	kinesin-like protein KIN-7E, chloroplastic (LOC103646439), mRNA	1153	63.13	1066	0	1195		XM_010324633.2	kinesin-like protein KIN-7C, mitochondrial (LOC101264334), transcript variant X2, mRNA	1161	68	1072	0	1274		XM_010665893.2	kinesin-like protein KIN-7C, mitochondrial (LOC100248995), transcript variant X1, mRNA	1149	75.63	1067	0	1472		XM_007225366.2	kinesin-like protein KIN-7C, mitochondrial (LOC18789631), mRNA	1235	71.36	1065	0	1402
	UN000364	XM_020675525.1	uncharacterized LOC18447396 (LOC18447396), transcript variant X1, mRNA	1323	36.75	536	4e-67	249		XM_009401244.2	uncharacterized LOC103983898 (LOC103983898), transcript variant X5, mRNA	1228	39.66	595	7e-85	303		XM_008665080.2	hapless 8 (LOC103641749), mRNA	1264	38.37	516	1e-54	210		XM_004243951.2	uncharacterized LOC101263134 (LOC101263134), transcript variant X1, mRNA	1415	37	527	1e-51	200		XM_010646390.1	uncharacterized LOC100263414 (LOC100263414), transcript variant X3, mRNA	1474	33.57	1409	7e-119	405		XM_020565093.1	uncharacterized LOC18774051 (LOC18774051), transcript variant X5, mRNA	1435	41.23	473	7e-72	265
	UN000368	XM_006840468.3	chloroplast 159, chloroplastic (LOC18430309), mRNA	1430	67.76	850	0	1041		XM_009421232.2	translocase of chloroplast 159, chloroplastic-like (LOC103999474), transcript variant X3, mRNA	1325	71.66	847	0	1096		XM_008658269.2	translocase of chloroplast 159, chloroplastic (LOC103635889), mRNA	1403	68.51	851	0	1055		XM_010328278.2	translocase of chloroplast 159, chloroplastic (LOC101258595), mRNA	1407	67.59	830	0	948		XM_002267238.3	translocase of chloroplast 159, chloroplastic (LOC100243553), mRNA	1476	72.24	832	0	1087		XM_020570377.1	translocase of chloroplast 159, chloroplastic (LOC18767259), transcript variant X2, mRNA	1348	66.36	856	0	973
	UN000369	XM_011628438.2	ABC transporter G family member 42 (LOC18443415), transcript variant X2, mRNA	1559	79.6	1407	0	2190		XM_009419440.2	ABC transporter G family member 42-like (LOC103998064), transcript variant X2, mRNA	1524	79.29	1410	0	2149		XM_008661458.2	ABC transporter G family member 42 (LOC103638587), mRNA	1532	75.55	1411	0	2063		XM_004235598.3	ABC transporter G family member 36-like (LOC101256077), mRNA	1548	80.28	1410	0	2219		XM_010656323.2	ABC transporter G family member 29 (LOC100248134), mRNA	1493	83.03	1420	0	2282		XM_020560810.1	ABC transporter G family member 29 (LOC18784461), mRNA	1535	79.7	1419	0	2221
	UN000371	XM_020673006.1	ABC transporter C family member 8 (LOC18443565), mRNA	1460	66.51	1457	0	1820		XM_009382939.2	ABC transporter C family member 8 (LOC103969423), transcript variant X1, mRNA	1499	64.03	1465	0	1751		NM_001112472.2	NM_001112472.2 length 1493 aa, 4482 bp, from 156..4637 of NM_001112472.2 Zea mays multidrug resistance protein associated 1 (mrpa1), mRNA	1493	60.87	1477	0	1616		XM_004252325.3	ABC transporter C family member 8 (LOC101252258), transcript variant X1, mRNA	1469	61.81	1461	0	1637		XM_019222187.1	ABC transporter C family member 8 (LOC100246410), transcript variant X2, mRNA	1474	66.21	1459	0	1786		XM_020559554.1	ABC transporter C family member 8 (LOC18784501), mRNA	1465	65.89	1454	0	1823
	UN000375	XM_011624761.2	TOR 2 (LOC18433549), transcript variant X1, mRNA	1373	73.89	1379	0	1891		XM_009388446.2	regulatory-associated protein of TOR 2 (LOC103973785), mRNA	1391	76.22	1375	0	1895		XM_008664134.2	regulatory-associated protein of TOR 2 (LOC103640651), transcript variant X1, mRNA	1355	71.17	1311	0	1693		XM_004246268.3	regulatory-associated protein of TOR 1 (LOC101246173), mRNA	1353	74.44	1373	0	1910		XM_003632539.3	regulatory-associated protein of TOR 1 (LOC100261889), mRNA	1363	76.96	1376	0	1919		XM_007208329.2	regulatory-associated protein of TOR 1 (LOC18774912), mRNA	1346	77.71	1377	0	1920
	UN000377	XM_020661884.1	myosin-12 (LOC18421431), transcript variant X4, mRNA	1477	82.2	1466	0	2407		XM_009395990.2	myosin-12-like (LOC103979779), mRNA	1553	82.99	1552	0	2561		XM_020537869.1	myosin-12 (LOC103625885), transcript variant X1, mRNA	1557	77.31	1556	0	2441		XM_010325148.1	myosin-12 (LOC101264152), transcript variant X2, mRNA	1567	78.05	1567	0	2487		XM_010661311.2	myosin-12 (LOC100266530), mRNA	1596	81.93	1555	0	2554		XM_020557863.1	myosin-12 (LOC18786033), transcript variant X1, mRNA	1555	79.02	1554	0	2467
	UN000378	XM_020666640.1	uncharacterized LOC18433514 (LOC18433514), transcript variant X4, mRNA	1388	30.69	619	7e-31	132		XM_018819568.1	uncharacterized LOC104000929 (LOC104000929), transcript variant X1, mRNA	1240	30.55	491	2e-22	105		---	---	0	---	---	---	---		XM_004237108.3	uncharacterized LOC101245151 (LOC101245151), transcript variant X1, mRNA	1214	34.55	275	2e-26	117		XM_010659841.2	uncharacterized LOC100854874 (LOC100854874), transcript variant X1, mRNA	1381	35.29	768	2e-77	280		XM_020558425.1	uncharacterized LOC18787245 (LOC18787245), mRNA	1328	27.38	1238	5e-62	232
	UN000381	XM_011625386.2	pheophytinase, chloroplastic (LOC18422629), transcript variant X2, mRNA	357	32.18	289	3e-33	131		XM_009409700.2	uncharacterized LOC103990526 (LOC103990526), transcript variant X1, mRNA	719	61.52	660	0	784		NM_001136856.2	NM_001136856.2 length 706 aa, 2121 bp, from 62..2182 of NM_001136856.2 Zea mays DNA photolyase (pco082395), mRNA	706	56.13	661	0	679		XM_004233480.3	pheophytinase, chloroplastic (LOC101268836), mRNA	372	35	300	4e-35	137		XM_010664090.2	uncharacterized LOC100259267 (LOC100259267), transcript variant X2, mRNA	718	65.24	679	0	829		XM_020557859.1	uncharacterized LOC18787157 (LOC18787157), transcript variant X1, mRNA	686	58.32	667	0	769
	UN000384	XM_006826666.3	DEAD-box ATP-dependent RNA helicase 42 (LOC18421863), mRNA	1277	79.91	916	0	1184		XM_018819644.1	DEAD-box ATP-dependent RNA helicase 42 (LOC103968834), transcript variant X2, mRNA	1141	79.04	897	0	1174		NM_001174353.1	NM_001174353.1 length 359 aa, 1080 bp, from 76..1155 of NM_001174353.1 Zea mays uncharacterized LOC100381523 (LOC100381523), mRNA	359	72.51	371	2e-147	440		XM_010316437.2	DEAD-box ATP-dependent RNA helicase 42 (LOC101254580), transcript variant X1, mRNA	1164	77.06	898	0	1191		XM_002280013.4	DEAD-box ATP-dependent RNA helicase 42 (LOC100262258), transcript variant X1, mRNA	1173	78.02	901	0	1204		XM_020563692.1	DEAD-box ATP-dependent RNA helicase 42 (LOC18775827), transcript variant X5, mRNA	1179	80.07	903	0	1214
	UN000385	XM_006828781.3	DNA-directed RNA polymerase II subunit 1 (RPB1), transcript variant X1, mRNA	1844	92.98	1538	0	2977		XM_009403128.2	DNA-directed RNA polymerase II subunit 1 (LOC103985434), mRNA	1832	92.55	1543	0	2962		NM_001305817.1	NM_001305817.1 length 1850 aa, 5553 bp, from 260..5812 of NM_001305817.1 Zea mays DNA-directed RNA polymerase II subunit 1 (LOC541967), mRNA	1850	90.23	1536	0	2895		XM_004232479.3	DNA-directed RNA polymerase II subunit 1 (LOC778257), mRNA	1846	90.69	1536	0	2912		XM_002285864.4	DNA-directed RNA polymerase II subunit 1 (LOC100264310), mRNA	1848	95.37	1535	0	3045		XM_007202996.2	DNA-directed RNA polymerase II subunit 1 (LOC18769771), transcript variant X1, mRNA	1861	91.6	1535	0	2927
	UN000386	XM_020664666.1	uncharacterized LOC18421421 (LOC18421421), transcript variant X1, mRNA	1427	46.47	723	0	579		XM_018824977.1	uncharacterized LOC103983097 (LOC103983097), transcript variant X3, mRNA	1389	43.65	866	0	607		XM_008653855.2	Acyl-CoA N-acyltransferase with RING/FYVE/PHD-type zinc finger protein (LOC103631995), transcript variant X3, mRNA	1454	43.62	674	1e-153	496		XM_019212743.1	uncharacterized LOC101268353 (LOC101268353), mRNA	1107	43.54	875	0	568		XM_010651593.2	uncharacterized LOC100247619 (LOC100247619), transcript variant X1, mRNA	1438	46.82	927	0	692		XM_007224423.2	uncharacterized LOC18791629 (LOC18791629), transcript variant X1, mRNA	1349	44.49	944	0	649
	UN000387	XM_020664432.1	protein NETWORKED 1D (LOC18429645), transcript variant X5, mRNA	1869	32.36	1891	0	656		XM_009400275.2	protein NETWORKED 1D-like (LOC103983108), transcript variant X1, mRNA	1796	33.84	1782	0	679		XM_008646614.2	protein NETWORKED 1A (LOC103626210), transcript variant X1, mRNA	2160	31.39	1510	2e-133	462		XM_004247540.3	protein NETWORKED 1A (LOC101252434), mRNA	1866	34.44	1301	3e-152	513		XM_010653699.2	protein NETWORKED 1D (LOC100852899), mRNA	1876	35.62	1853	0	803		XM_020570181.1	protein NETWORKED 1D (LOC18767555), transcript variant X1, mRNA	1805	35.88	1190	4e-163	543
	UN000390	XM_006851832.3	nuclear pore complex protein NUP160 (LOC18441603), transcript variant X3, mRNA	1503	56.62	1503	0	1649		XM_009419234.2	nuclear pore complex protein NUP160 (LOC103997899), transcript variant X1, mRNA	1510	57.73	1500	0	1670		NM_001196046.1	NM_001196046.1 length 599 aa, 1800 bp, from 33..1832 of NM_001196046.1 Zea mays uncharacterized LOC100501287 (LOC100501287), mRNA	599	46.68	587	9e-161	499		XM_010315784.2	nuclear pore complex protein NUP160 (LOC101252933), transcript variant X1, mRNA	1487	53.67	1498	0	1567		XM_010649923.2	nuclear pore complex protein NUP160 (LOC100250223), transcript variant X1, mRNA	1504	60.99	1502	0	1820		XM_020563856.1	nuclear pore complex protein NUP160 (LOC18777630), mRNA	804	59.25	805	0	926
	UN000391	XM_020662857.1	ATP-dependent RNA helicase DEAH13 (LOC18427096), mRNA	1295	62.62	1086	0	1279		XM_018823713.1	ATP-dependent RNA helicase DEAH13 (LOC103977649), transcript variant X3, mRNA	1308	60.53	1272	0	1409		XM_008647994.2	ATP-dependent RNA helicase DEAH13 (LOC103627696), transcript variant X1, mRNA	1279	58.47	1098	0	1175		XM_010328653.2	ATP-dependent RNA helicase DEAH13 (LOC101245407), transcript variant X1, mRNA	1341	59.01	1271	0	1354		XM_019221282.1	ATP-dependent RNA helicase DEAH13 (LOC100262427), transcript variant X6, mRNA	1384	62.83	1267	0	1489		XM_020554371.1	ATP-dependent RNA helicase DEAH13 (LOC18790654), transcript variant X8, mRNA	1337	58.58	1270	0	1306
	UN000392	XM_006853400.3	ABC transporter D family member 1 (LOC18443208), transcript variant X1, mRNA	1352	77.6	1348	0	2085		XM_009395537.2	ABC transporter D family member 1-like (LOC103979402), transcript variant X1, mRNA	1329	77.94	1342	0	2128		NM_001348470.1	NM_001348470.1 length 1331 aa, 3996 bp, from 347..4342 of NM_001348470.1 Zea mays uncharacterized LOC100502226 (LOC100502226), mRNA	1331	72.79	1349	0	1989		XM_004237348.3	ABC transporter D family member 1 (LOC101260717), transcript variant X1, mRNA	1357	76.18	1339	0	2017		XM_002265848.3	ABC transporter D family member 2, chloroplastic (LOC100258729), mRNA	765	28.41	623	2e-46	180		XM_020556695.1	ABC transporter D family member 1 (LOC18787928), transcript variant X1, mRNA	1347	79.08	1348	0	2149
	UN000393	XM_011623082.2	uncharacterized LOC18428846 (LOC18428846), transcript variant X1, mRNA	2165	51.7	176	7e-37	142		XM_009402365.2	uncharacterized LOC103984704 (LOC103984704), transcript variant X2, mRNA	2199	35.4	226	2e-25	109		XM_020546429.1	G2484-1 protein (LOC103637646), transcript variant X2, mRNA	2090	44.14	145	1e-23	104		XM_004246109.3	uncharacterized LOC101252108 (LOC101252108), transcript variant X3, mRNA	2155	50.77	130	7e-26	110		XM_002267101.3	uncharacterized LOC100266068 (LOC100266068), transcript variant X3, mRNA	2292	47.24	199	2e-40	154		XM_020564309.1	serine-rich adhesin for platelets (LOC18777292), transcript variant X2, mRNA	2336	53.14	175	6e-46	169
	UN000397	XM_020666453.1	golgin subfamily A member 4 (LOC18432919), transcript variant X6, mRNA	1341	47.03	572	5e-122	416		XM_009413232.1	cingulin-like (LOC103993244), mRNA	1497	52.83	566	7e-145	484		XM_008651674.2	cingulin (LOC103630626), mRNA	1449	43.68	863	1e-174	565		XM_010327652.2	ELKS/Rab6-interacting/CAST family member 1-like (LOC101267051), mRNA	1374	45.45	484	1e-94	336		XM_010660018.2	myosin-9 (LOC100254715), mRNA	1678	51.1	771	1e-174	570		XM_020569216.1	intracellular protein transport protein USO1 (LOC18769168), mRNA	1458	45.29	1380	0	902
	UN000398	XM_006839075.3	ABC transporter C family member 3 (LOC18429792), transcript variant X1, mRNA	1508	65.68	1460	0	1782		XM_009382995.2	ABC transporter C family member 3-like (LOC103969465), mRNA	1557	68.52	1458	0	1877		XM_020543288.1	ABC transporter C family member 3-like (LOC109941983), mRNA	1512	65.61	1422	0	1754		XM_010325975.2	ABC transporter C family member 3 (LOC101250322), mRNA	1512	66.85	1460	0	1858		XM_003634707.3	ABC transporter C family member 3 (LOC100254999), mRNA	1494	70.6	1459	0	1966		XM_007213663.2	ABC transporter C family member 3 (LOC18780896), mRNA	1507	70.66	1452	0	1989
	UN000401	XM_020671500.1	protein HUA2-LIKE 2 (LOC18440587), transcript variant X5, mRNA	1457	54.52	398	1e-98	347		XM_009406431.2	protein HUA2-LIKE 3 (LOC103987957), mRNA	1435	38.62	1502	0	660		XM_020546384.1	protein HUA2-LIKE 2-like (LOC103644661), transcript variant X3, mRNA	1433	52.74	347	6e-88	316		XM_019215572.1	protein HUA2-LIKE 2 (LOC101258186), mRNA	1681	61.17	291	3e-91	327		XM_002271830.4	protein HUA2-LIKE 2 (LOC100261323), transcript variant X1, mRNA	1479	42.06	1505	0	810		XM_020570154.1	probable glutathione peroxidase 5 (LOC18766597), transcript variant X1, mRNA	1432	40.37	1479	0	724
	UN000403	XM_020671368.1	SAC3 family protein B (LOC18440652), transcript variant X1, mRNA	1407	47.72	1423	0	1098		XM_018826609.1	SAC3 family protein B (LOC103986251), transcript variant X2, mRNA	1754	45.04	1543	0	1089		XM_008655185.2	SAC3 family protein B-like (LOC103633501), transcript variant X7, mRNA	1503	52.83	653	0	634		XM_010315873.2	SAC3 family protein B (LOC101253869), transcript variant X1, mRNA	1570	44.52	1550	0	1041		XM_002277268.3	SAC3 family protein B (LOC100266559), mRNA	1557	47.86	1517	0	1208		XM_020569707.1	SAC3 family protein B (LOC18790207), mRNA	1601	44.96	1568	0	1079
	UN000404	XM_006828130.3	DNA damage-binding protein 1 (LOC18423529), mRNA	1089	89.26	1089	0	2012		XM_009413752.2	DNA damage-binding protein 1 (LOC103993621), mRNA	1089	88.98	1089	0	2000		NM_001329507.1	NM_001329507.1 length 1089 aa, 3270 bp, from 53..3322 of NM_001329507.1 Zea mays DNA damage-binding protein 1a (LOC100279448), mRNA	1089	83.75	1089	0	1875		NM_001247346.1	NM_001247346.1 length 1090 aa, 3273 bp, from 53..3325 of NM_001247346.1 Solanum lycopersicum UV-damaged DNA binding protein 1 (DDB1), mRNA	1090	88.17	1090	0	1964		XM_002280699.3	DNA damage-binding protein 1 (LOC100256664), transcript variant X1, mRNA	1089	90.73	1089	0	2021		XM_007213652.2	DNA damage-binding protein 1 (LOC18778981), mRNA	1113	88.71	1089	0	1972
	UN000407	XM_020661826.1	ABC transporter G family member 39 (LOC18425022), mRNA	1461	78.61	589	0	927		XM_009409169.2	ABC transporter G family member 36 (LOC103990131), mRNA	1487	81.34	595	0	984		XM_008681639.2	ABC transporter G family member 39 (LOC103654816), mRNA	1443	80.44	593	0	961		XM_004247793.3	pleiotropic drug resistance protein 1 (LOC101259884), mRNA	1455	79.07	583	0	939		XM_010650302.2	pleiotropic drug resistance protein 1 (LOC100250693), transcript variant X2, mRNA	1439	81.03	601	0	972		XM_020560690.1	pleiotropic drug resistance protein 1 (LOC18783732), mRNA	1454	78.15	595	0	935
	UN000408	XM_020675675.1	DNA-directed RNA polymerase IV subunit 1 (LOC18447780), mRNA	1442	44.61	269	3e-61	231		XM_009413174.2	DNA-directed RNA polymerase IV subunit 1 (LOC103993205), transcript variant X1, mRNA	1569	55.31	179	1e-48	191		XM_020539026.1	DNA dependent RNA polymerase D largest subunit (LOC100501057), transcript variant X2, mRNA	1392	39.27	303	3e-60	228		XM_010327133.2	DNA-directed RNA polymerase IV subunit 1 (LOC778259), transcript variant X2, mRNA	1452	45.21	261	1e-54	210		XM_019217351.1	DNA-directed RNA polymerase IV subunit 1 (LOC100254724), transcript variant X4, mRNA	1243	49.13	289	4e-77	281		XM_020564395.1	DNA-directed RNA polymerase IV subunit 1 (LOC18776740), transcript variant X2, mRNA	1178	45.36	291	2e-66	246
	UN000409	XM_006828170.3	uncharacterized LOC18423569 (LOC18423569), transcript variant X1, mRNA	1355	24.92	325	9e-06	50.1		XM_009389164.2	uncharacterized LOC103974356 (LOC103974356), mRNA	1339	31.96	194	8e-14	77		---	---	0	---	---	---	---		---	---	0	---	---	---	---		XM_002284593.4	uncharacterized LOC100250176 (LOC100250176), mRNA	1393	35.46	361	3e-32	136		XM_020565471.1	uncharacterized LOC18772004 (LOC18772004), transcript variant X1, mRNA	1384	29.69	384	2e-20	98.6
	UN000410	XM_006854526.3	uncharacterized LOC18444353 (LOC18444353), mRNA	1127	69.49	1111	0	1415		XM_018822594.1	E3 ubiquitin-protein ligase HERC2-like (LOC103976537), mRNA	1135	69.93	1124	0	1412		XM_008669985.2	uncharacterized LOC100304223 (LOC100304223), transcript variant X2, mRNA	1056	55.6	1126	0	1104		XM_004237719.3	uncharacterized LOC101260719 (LOC101260719), transcript variant X1, mRNA	1149	71.83	1136	0	1488		XM_002264057.4	uncharacterized LOC100246114 (LOC100246114), mRNA	1146	75.22	1134	0	1563		XM_007201700.2	E3 ubiquitin-protein ligase HERC2 (LOC18768395), mRNA	1114	72.53	1132	0	1483
	UN000411	XM_006851817.3	U-box domain-containing protein 43 (LOC18441587), mRNA	1025	62.77	513	0	603		XM_009397100.2	U-box domain-containing protein 44-like (LOC103980646), mRNA	1064	61.98	505	0	558		XM_008675994.2	U-box domain-containing protein 43 (LOC103650422), mRNA	855	37.45	251	9e-35	144		XM_010328927.2	U-box domain-containing protein 44-like (LOC101259371), transcript variant X1, mRNA	993	60.92	499	0	561		XM_010663679.2	U-box domain-containing protein 43 (LOC100248467), transcript variant X1, mRNA	1006	67.91	511	0	657		XM_007220218.2	U-box domain-containing protein 44 (LOC18787137), transcript variant X1, mRNA	1016	65.56	511	0	640
	UN000412	XM_020670144.1	probable histidine kinase 5 (LOC18438816), transcript variant X6, mRNA	1031	67.76	397	7e-164	514		XM_009388037.2	probable histidine kinase 5 (LOC103973463), transcript variant X1, mRNA	1149	64.48	397	6e-154	492		NM_001111397.1	NM_001111397.1 length 1201 aa, 3606 bp, from 1..3606 of NM_001111397.1 Zea mays histidine kinase 3 (hk3), mRNA	1201	58.4	399	3e-125	416		XM_004243510.3	histidine kinase 2 (LOC101255900), mRNA	1262	60.8	398	1e-138	454		XM_010659148.2	histidine kinase 2 (LOC100263145), transcript variant X1, mRNA	1275	64.25	400	8e-152	489		XM_007217590.2	histidine kinase 2 (LOC18783541), mRNA	1245	63.09	401	3e-145	471
	UN000413	XM_011630853.1	eukaryotic translation initiation factor 5B (LOC18424827), mRNA	378	84.84	310	0	550		XM_009402254.2	eukaryotic translation initiation factor 5B-like (LOC103984702), mRNA	1239	79.92	707	0	1112		XM_008657093.2	eukaryotic translation initiation factor 2 (eIF-2) family protein (pco073635), transcript variant X1, mRNA	1296	74.61	701	0	1025		XM_010319630.2	eukaryotic translation initiation factor 5B-like (LOC101255564), mRNA	1168	76.35	706	0	1061		XM_002266978.4	eukaryotic translation initiation factor 5B (LOC100242745), transcript variant X1, mRNA	1403	79.83	704	0	1122		XM_007199618.2	eukaryotic translation initiation factor 5B (LOC18767245), mRNA	1381	73.86	834	0	1155
	UN000414	XM_006849268.3	uncharacterized LOC18439093 (LOC18439093), transcript variant X1, mRNA	1201	51.41	743	5e-174	549		XM_009409392.2	uncharacterized LOC103990307 (LOC103990307), mRNA	1371	45.55	1214	0	767		XM_020550470.1	nucleic acid binding (LOC103651171), transcript variant X4, mRNA	1128	45.02	311	3e-59	224		XM_010321997.2	uncharacterized LOC101254993 (LOC101254993), mRNA	1354	46.81	690	1e-157	509		XM_010666219.2	uncharacterized LOC100259158 (LOC100259158), transcript variant X2, mRNA	1358	47.89	1234	0	883		XM_020560881.1	uncharacterized LOC18792006 (LOC18792006), mRNA	1203	48.88	714	8e-174	549
	UN000415	XM_011627150.2	clustered mitochondria protein (LOC18439880), transcript variant X1, mRNA	1447	74.41	891	0	1240		XM_009417293.2	clustered mitochondria protein-like (LOC103996372), mRNA	1423	69.57	894	0	1178		XM_008680822.2	clustered mitochondria protein (LOC103653997), transcript variant X3, mRNA	1350	65.16	887	0	1095		XM_004229552.3	clustered mitochondria protein (LOC101262958), transcript variant X2, mRNA	1429	70.35	904	0	1205		XM_010661022.2	clustered mitochondria protein (LOC100264871), mRNA	1445	74.62	914	0	1280		XM_007220855.2	clustered mitochondria protein (LOC18787176), transcript variant X1, mRNA	1494	73.33	930	0	1281
	UN000417	XM_006851817.3	U-box domain-containing protein 43 (LOC18441587), mRNA	1025	59.07	1014	0	1132		XM_009397100.2	U-box domain-containing protein 44-like (LOC103980646), mRNA	1064	60	1005	0	1108		NM_001136919.1	NM_001136919.1 length 715 aa, 2148 bp, from 12..2159 of NM_001136919.1 Zea mays U-box domain-containing protein 44 (LOC100191487), mRNA	715	37.38	610	1e-115	373		XM_010328927.2	U-box domain-containing protein 44-like (LOC101259371), transcript variant X1, mRNA	993	56.83	996	0	1043		XM_010663679.2	U-box domain-containing protein 43 (LOC100248467), transcript variant X1, mRNA	1006	64.62	1009	0	1237		XM_007220218.2	U-box domain-containing protein 44 (LOC18787137), transcript variant X1, mRNA	1016	63.53	1009	0	1239
	UN000418	XM_006841612.3	uncharacterized LOC18431487 (LOC18431487), mRNA	959	40.08	1023	1e-169	531		XM_009385700.2	uncharacterized LOC103971636 (LOC103971636), mRNA	1302	32.4	892	8e-82	295		XM_008667568.2	uncharacterized LOC103644350 (LOC103644350), mRNA	1236	29.95	965	2e-78	284		XM_004232784.3	uncharacterized LOC101263075 (LOC101263075), mRNA	896	40.12	982	4e-162	509		XM_010649169.2	uncharacterized LOC100854548 (LOC100854548), mRNA	1030	48.41	1041	0	811		XM_007213662.2	uncharacterized LOC18779486 (LOC18779486), mRNA	1247	44.14	1058	0	681
	UN000419	XM_006845489.2	glutamate receptor 2.8 (LOC18435444), mRNA	955	49.08	870	0	764		XM_018823149.1	glutamate receptor 2.7-like (LOC103977338), mRNA	951	51.32	912	0	884		XM_020541807.1	glutamate receptor 2.8 (LOC103632790), mRNA	939	49.46	831	0	772		XM_004244446.3	glutamate receptor 2.6 (LOC101267544), mRNA	952	49.51	927	0	833		XM_019219290.1	glutamate receptor 2.8-like (LOC100260624), mRNA	896	52.25	865	0	858		XM_020555955.1	glutamate receptor 2.8 (LOC18790719), transcript variant X1, mRNA	997	48.63	911	0	826
	UN000420	XM_011627267.2	uncharacterized LOC18440101 (LOC18440101), transcript variant X2, mRNA	1179	40.18	978	1e-111	377		XM_009405989.2	uncharacterized LOC103987635 (LOC103987635), transcript variant X1, mRNA	1194	38.63	994	3e-117	393		XM_008675947.2	uncharacterized LOC103650352 (LOC103650352), transcript variant X3, mRNA	1179	32.6	1000	7e-60	226		XM_010322673.2	uncharacterized LOC101256284 (LOC101256284), transcript variant X2, mRNA	1131	39.11	969	4e-116	388		XM_002266064.3	microtubule-associated protein futsch (LOC100244315), mRNA	1184	49.27	956	0	640		XM_020562809.1	uncharacterized LOC18792788 (LOC18792788), transcript variant X2, mRNA	1191	43.69	966	2e-159	507
	UN000421	XM_020672333.1	uncharacterized LOC18442408 (LOC18442408), mRNA	1204	25.72	933	1e-31	134		XM_009382206.2	uncharacterized LOC103968867 (LOC103968867), transcript variant X1, mRNA	1231	26.19	970	1e-33	140		---	---	0	---	---	---	---		XM_010325340.1	uncharacterized LOC101250820 (LOC101250820), transcript variant X4, mRNA	1093	28.5	200	1e-11	69.7		XM_019223816.1	uncharacterized LOC100255858 (LOC100255858), transcript variant X1, mRNA	1240	31.5	1035	6e-90	313		XM_020560309.1	uncharacterized LOC18784236 (LOC18784236), mRNA	1299	28.13	1045	2e-57	216
	UN000424	XM_011627267.2	uncharacterized LOC18440101 (LOC18440101), transcript variant X2, mRNA	1179	40.41	980	2e-111	376		XM_009405989.2	uncharacterized LOC103987635 (LOC103987635), transcript variant X1, mRNA	1194	38.53	994	3e-117	393		XM_008675947.2	uncharacterized LOC103650352 (LOC103650352), transcript variant X3, mRNA	1179	32.73	996	1e-60	228		XM_010322673.2	uncharacterized LOC101256284 (LOC101256284), transcript variant X2, mRNA	1131	39.34	966	6e-117	390		XM_002266064.3	microtubule-associated protein futsch (LOC100244315), mRNA	1184	49.16	956	0	633		XM_020562809.1	uncharacterized LOC18792788 (LOC18792788), transcript variant X2, mRNA	1191	43.63	965	5e-159	505
	UN000427	XM_006847735.3	myosin-1 (LOC18437521), transcript variant X1, mRNA	1169	70	1190	0	1671		XM_009408496.2	myosin-1-like (LOC103989574), mRNA	1222	73.76	1212	0	1785		NM_001350260.1	NM_001350260.1 length 1208 aa, 3627 bp, from 371..3997 of NM_001350260.1 Zea mays uncharacterized LOC100277427 (LOC100277427), mRNA	1208	68.98	1196	0	1670		XM_004231474.3	myosin-1 (LOC101253239), mRNA	1161	73.73	1180	0	1764		XM_010657727.2	myosin-1 (LOC100254832), transcript variant X1, mRNA	1197	78.71	1193	0	1916		XM_020554078.1	myosin-1 (LOC18789301), mRNA	1182	75.65	1199	0	1817
	UN000428	XM_006826880.3	intron-binding protein aquarius (LOC18422467), mRNA	1548	78.53	1542	0	2341		XM_009405777.2	intron-binding protein aquarius (LOC103987462), mRNA	1505	80.86	1531	0	2436		XM_008658271.2	intron-binding protein aquarius (LOC103635888), mRNA	1649	76.56	1527	0	2305		XM_010322394.2	intron-binding protein aquarius (LOC101244224), mRNA	1588	76.96	1541	0	2344		XM_010654864.1	intron-binding protein aquarius (LOC100260373), transcript variant X1, mRNA	1552	80.3	1533	0	2436		XM_007220519.2	intron-binding protein aquarius (LOC18786220), mRNA	1550	80.03	1542	0	2420
	UN000429	XM_006851752.3	cleavage and polyadenylation specificity factor subunit 1 (LOC18441515), transcript variant X2, mRNA	1492	74.66	1464	0	2287		XM_009385713.2	cleavage and polyadenylation specificity factor subunit 1 (LOC103971647), transcript variant X1, mRNA	1458	77.34	1461	0	2360		XM_020548356.1	probable cleavage and polyadenylation specificity factor subunit 1 (LOC103648775), transcript variant X1, mRNA	1442	67.92	1468	0	2022		XM_010319165.2	cleavage and polyadenylation specificity factor subunit 1 (LOC101246111), mRNA	1450	72.26	1460	0	2174		XM_002268335.3	cleavage and polyadenylation specificity factor subunit 1 (LOC100256706), transcript variant X3, mRNA	1497	79.01	1458	0	2424		XM_007220248.2	cleavage and polyadenylation specificity factor subunit 1 (LOC18787193), mRNA	1459	78.27	1459	0	2401
	UN000430	XM_006849852.3	squamosa promoter-binding-like protein 14 (LOC18439694), mRNA	1108	58.94	1130	0	1043		XM_018826432.1	squamosa promoter-binding-like protein 15 (LOC103985515), transcript variant X3, mRNA	1115	57.44	1109	0	1042		NM_001350289.1	NM_001350289.1 length 1106 aa, 3321 bp, from 389..3709 of NM_001350289.1 Zea mays squamosa promoter-binding-like protein 15 (LOC103642178), mRNA	1106	48.82	1143	0	832		XM_004239841.3	squamosa promoter-binding-like protein 1 (LOC101267894), mRNA	1005	35.45	567	2e-92	318		XM_002273748.2	squamosa promoter-binding-like protein 14 (LOC100240978), mRNA	1070	61.99	1105	0	1145		XM_020563295.1	squamosa promoter-binding-like protein 14 (LOC18778077), mRNA	1077	57.86	1101	0	1053
	UN000431	XM_006843169.3	E3 ubiquitin-protein ligase UPL4 (LOC18433072), transcript variant X1, mRNA	1681	58.98	568	0	641		XM_018826471.1	E3 ubiquitin-protein ligase UPL4 (LOC103984915), transcript variant X2, mRNA	1508	62.01	566	0	702		XM_008658155.2	E3 ubiquitin-protein ligase UPL4 (LOC103635779), mRNA	1569	58.23	565	0	642		XM_010327721.2	E3 ubiquitin-protein ligase UPL4 (LOC101257890), transcript variant X1, mRNA	1559	58.41	565	0	651		XM_019221689.1	E3 ubiquitin-protein ligase UPL4 (LOC100243094), transcript variant X4, mRNA	1352	62.85	568	0	712		XM_007208333.2	E3 ubiquitin-protein ligase UPL4 (LOC18773343), mRNA	1542	60.53	570	0	696
	UN000435	XM_006827565.3	uncharacterized LOC18422877 (LOC18422877), transcript variant X1, mRNA	1005	48.28	1019	0	723		XM_009401983.2	uncharacterized LOC103984483 (LOC103984483), transcript variant X1, mRNA	1013	50.34	1037	0	834		XM_008667562.2	hypothetical protein (LOC103644346), mRNA	957	59.04	586	0	627		XM_004234358.3	uncharacterized LOC101254456 (LOC101254456), transcript variant X1, mRNA	943	48.41	1008	0	752		XM_010664425.2	uncharacterized LOC100264485 (LOC100264485), transcript variant X3, mRNA	961	65.45	576	0	700		XM_020557134.1	uncharacterized LOC18785568 (LOC18785568), transcript variant X1, mRNA	946	51.34	1009	0	795
	UN000436	XM_006844153.3	probable acyl-activating enzyme 17, peroxisomal (LOC18434078), transcript variant X1, mRNA	729	71.13	717	0	1024		XM_009408968.2	probable acyl-activating enzyme 17, peroxisomal (LOC103989982), mRNA	718	72.32	719	0	1057		XM_020540597.1	catalytic/ ligase (LOC100285971), transcript variant X1, mRNA	752	66.02	718	0	937		XM_004252196.3	probable acyl-activating enzyme 17, peroxisomal (LOC101262391), mRNA	722	68.41	725	0	996		XM_002270882.3	probable acyl-activating enzyme 17, peroxisomal (LOC100257673), transcript variant X1, mRNA	734	71.35	726	0	1059		XM_007210827.2	probable acyl-activating enzyme 17, peroxisomal (LOC18776360), transcript variant X2, mRNA	726	73	726	0	1077
	UN000439	XM_006845680.3	probable phosphoribosylformylglycinamidine synthase, chloroplastic/mitochondrial (LOC18435637), transcript variant X1, mRNA	1412	80.87	1192	0	1961		XM_009422063.2	probable phosphoribosylformylglycinamidine synthase, chloroplastic/mitochondrial (LOC104000109), mRNA	1421	84.18	1188	0	2056		XM_008677736.2	putative phosphoribosylformylglycinamidine synthase chloroplastic/mitochondrial (LOC100192064), transcript variant X1, mRNA	1441	81.14	1188	0	1972		XM_004232978.3	probable phosphoribosylformylglycinamidine synthase, chloroplastic/mitochondrial (LOC101268249), transcript variant X1, mRNA	1412	82.04	1197	0	2020		XM_010660235.2	probable phosphoribosylformylglycinamidine synthase, chloroplastic/mitochondrial (LOC100246154), transcript variant X1, mRNA	1412	83.94	1189	0	2050		XM_007200273.2	probable phosphoribosylformylglycinamidine synthase, chloroplastic/mitochondrial (LOC18766885), mRNA	1412	82.87	1197	0	2045
	UN000442	XM_020670051.1	DNA repair protein UVH3 (LOC18438502), transcript variant X2, mRNA	1438	51.38	1302	0	1045		XM_018819773.1	DNA repair protein UVH3 (LOC104000066), transcript variant X2, mRNA	1534	66.21	438	5e-178	572		XM_008654004.2	DNA repair protein UVH3 (LOC103632168), transcript variant X3, mRNA	1269	53.01	598	5e-173	552		XM_004233288.3	DNA repair protein UVH3 (LOC101260299), transcript variant X1, mRNA	1539	48.56	1491	0	1090		XM_002275076.4	DNA repair protein UVH3 (LOC100245663), transcript variant X1, mRNA	1530	51.63	1501	0	1177		XM_020559525.1	DNA repair protein UVH3 (LOC18782408), transcript variant X2, mRNA	1571	49.4	1492	0	1125
	UN000445	XM_006828394.3	nuclear pore complex protein NUP155 (LOC18423797), transcript variant X1, mRNA	1494	72.23	1498	0	1937		XM_009410175.2	nuclear pore complex protein NUP155 (LOC103990883), mRNA	1514	70.51	1499	0	1900		XM_008654632.2	nuclear pore complex protein NUP155 (LOC103632918), transcript variant X1, mRNA	1506	64.97	1493	0	1727		XM_004242728.3	nuclear pore complex protein NUP155 (LOC101246938), mRNA	1481	70.8	1500	0	1873		XM_002281221.4	nuclear pore complex protein NUP155 (LOC100243944), transcript variant X1, mRNA	1496	76.2	1500	0	2061		XM_007226978.2	nuclear pore complex protein NUP155 (LOC18791607), mRNA	1528	73.3	1502	0	1988
	UN000446	XM_011622838.2	MAP3K epsilon protein kinase 1 (LOC18428087), transcript variant X1, mRNA	1468	71.14	1483	0	1963		XM_009385977.2	MAP3K epsilon protein kinase 1 (LOC103971844), mRNA	1367	70.67	1449	0	1930		XM_008669357.2	MAP3K epsilon protein kinase 1 (pco067729), transcript variant X1, mRNA	1356	63.48	1454	0	1717		NM_001247850.2	NM_001247850.2 length 1401 aa, 4206 bp, from 291..4496 of NM_001247850.2 Solanum lycopersicum MAP3K epsilon protein kinase (MAPKKKe), mRNA	1401	69.97	1445	0	1913		XM_002277286.4	MAP3K epsilon protein kinase 1 (LOC100254261), transcript variant X1, mRNA	1425	73.86	1450	0	2049		XM_007225401.2	MAP3K epsilon protein kinase 1 (LOC18791747), mRNA	1415	72.88	1449	0	2033
	UN000448	XM_020665154.1	alpha-glucan water dikinase, chloroplastic (LOC18430814), transcript variant X2, mRNA	1473	77.47	1176	0	1810		XM_009394010.2	alpha-glucan water dikinase, chloroplastic (LOC103978280), transcript variant X1, mRNA	1556	76.98	1177	0	1810		XM_008649791.2	Alpha-glucan water dikinase 1 chloroplastic (AY109804), transcript variant X1, mRNA	1469	72.69	1179	0	1743		NM_001247476.2	NM_001247476.2 length 1465 aa, 4398 bp, from 1..4398 of NM_001247476.2 Solanum lycopersicum glucan water dikinase (GWD), mRNA	1465	75.42	1180	0	1757		XM_002270449.3	alpha-glucan water dikinase, chloroplastic (LOC100246568), transcript variant X2, mRNA	1470	78.61	1183	0	1843		XM_007226977.2	alpha-glucan water dikinase, chloroplastic (LOC18790869), transcript variant X2, mRNA	1494	77.01	1183	0	1779
	UN000451	XM_011625847.2	transcription factor EMB1444 (LOC18436279), transcript variant X2, mRNA	685	45.97	385	4e-85	283		XM_009404667.2	transcription factor bHLH157 (LOC103986627), transcript variant X1, mRNA	723	35.62	772	6e-126	393		XM_008681465.2	transcription factor LHW (LOC100381930), mRNA	866	55.38	186	1e-57	211		NM_001247916.2	NM_001247916.2 length 740 aa, 2223 bp, from 722..2944 of NM_001247916.2 Solanum lycopersicum Prf interactor 30137 (LOC778232), mRNA	740	35.26	780	2e-119	376		XM_002271439.4	transcription factor LHW (LOC100249509), transcript variant X2, mRNA	720	42.21	777	3e-175	520		XM_007205214.2	transcription factor EMB1444 (LOC18774349), mRNA	702	39.72	783	3e-149	452
	UN000452	XM_006841354.3	DNA mismatch repair protein MSH6 (LOC18431226), transcript variant X1, mRNA	1427	67.14	703	0	935		XM_009402997.2	DNA mismatch repair protein MSH6 (LOC103985334), mRNA	1279	68.76	701	0	955		XM_020541216.1	mismatch binding protein Mus3 (LOC542626), mRNA	1390	59.77	706	0	837		XM_019212644.1	uncharacterized LOC101243927 (LOC101243927), mRNA	2997	67.05	701	0	938		XM_002275894.3	DNA mismatch repair protein MSH6 (LOC100255608), mRNA	1304	70.31	714	0	994		XM_020553659.1	DNA mismatch repair protein MSH6 (LOC18767598), mRNA	1272	67.37	708	0	967
	UN000453	XM_020673284.1	protein TPR2 (LOC18443884), transcript variant X1, mRNA	1167	82.57	1142	0	1940		XM_009397930.2	protein TPR2 (LOC103981268), transcript variant X1, mRNA	1147	83.7	1141	0	1985		NM_001174401.2	NM_001174401.2 length 1141 aa, 3426 bp, from 1..3426 of NM_001174401.2 Zea mays ramosa 1 enhancer locus 2 (rel2), mRNA	1141	80.56	1147	0	1909		XM_004245865.3	protein TPR2-like (LOC101248902), transcript variant X2, mRNA	1175	80.47	1137	0	1935		XM_010663833.2	protein TPR2 (LOC100251131), transcript variant X4, mRNA	1143	85.64	1135	0	2021		XM_020557001.1	protein TPR2 (LOC18786865), mRNA	1139	82.59	1137	0	1915
	UN000455	XM_006844875.3	putative phospholipid-transporting ATPase 9 (LOC18434812), transcript variant X1, mRNA	1196	78.51	1196	0	1937		XM_009382065.2	putative phospholipid-transporting ATPase 9 (LOC103968758), transcript variant X1, mRNA	1193	75.78	1193	0	1899		XM_008661309.2	putative phospholipid-transporting ATPase 9 (LOC103638375), mRNA	1219	69.81	1186	0	1699		XM_004238934.3	putative phospholipid-transporting ATPase 9 (LOC101245843), mRNA	1202	73.93	1193	0	1851		XM_002280382.3	putative phospholipid-transporting ATPase 9 (LOC100256123), mRNA	1186	77.66	1186	0	1907		XM_007225377.2	putative phospholipid-transporting ATPase 9 (LOC18790067), mRNA	1197	79.05	1184	0	1935
	UN000456	XM_020672348.1	endoribonuclease Dicer homolog 3a (LOC18442482), transcript variant X1, mRNA	1662	53.22	1616	0	1610		XM_009402351.2	endoribonuclease Dicer homolog 3b-like (LOC103984791), transcript variant X2, mRNA	1449	55	1320	0	1368		XM_008666622.2	endoribonuclease Dicer homolog 3b (LOC103643440), transcript variant X1, mRNA	1644	51.59	1607	0	1565		NM_001302897.1	NM_001302897.1 length 1668 aa, 5007 bp, from 40..5046 of NM_001302897.1 Solanum lycopersicum endoribonuclease Dicer homolog 3a (DCL3), mRNA	1668	55.76	1614	0	1652		XM_010650098.2	endoribonuclease Dicer homolog 3a (LOC100254311), transcript variant X1, mRNA	1684	62.08	1614	0	1922		XM_020566313.1	endoribonuclease Dicer homolog 3a (LOC18791456), transcript variant X2, mRNA	1711	58.36	1614	0	1785
	UN000458	XM_006858283.3	autophagy-related protein 11 (LOC18448210), transcript variant X1, mRNA	1144	59.9	1147	0	1190		XM_009388538.2	autophagy-related protein 11 (LOC103973870), mRNA	1156	56.03	1160	0	1130		XM_008681689.2	putative autophagy domain family protein (LOC103654871), mRNA	1139	50.96	1148	0	980		XM_004242573.3	autophagy-related protein 11 (LOC101251393), mRNA	1159	58.51	1169	0	1188		XM_002273580.3	autophagy-related protein 11 (LOC100267388), transcript variant X1, mRNA	1170	64.77	1161	0	1361		XM_007221816.2	autophagy-related protein 11 (LOC18789676), mRNA	1151	65.02	1172	0	1361
	UN000459	XM_020664201.1	uncharacterized LOC18429072 (LOC18429072), transcript variant X1, mRNA	1449	71.32	1374	0	1592		XM_009401940.2	uncharacterized LOC103984453 (LOC103984453), transcript variant X1, mRNA	1451	73.4	1372	0	1668		XM_008664844.2	uncharacterized LOC103641500 (LOC103641500), mRNA	1447	67.56	1375	0	1536		XM_004245806.3	uncharacterized LOC101256905 (LOC101256905), transcript variant X2, mRNA	1442	69.15	1371	0	1585		XM_010665774.2	uncharacterized LOC100254039 (LOC100254039), transcript variant X1, mRNA	1446	74.11	1371	0	1768		XM_020563974.1	uncharacterized LOC18776933 (LOC18776933), transcript variant X1, mRNA	1447	71.61	1370	0	1650
	UN000460	---	---	0	---	---	---	---		XM_009388255.2	cytochrome c oxidase subunit 3 (LOC103973627), mRNA	299	93.66	268	5e-162	452		---	---	0	---	---	---	---		---	---	0	---	---	---	---		XM_019218225.1	cytochrome c oxidase subunit 3 (LOC104878239), mRNA	110	88.61	79	2e-42	141		---	---	0	---	---	---	---
	UN000462	XM_006851004.3	magnesium-chelatase subunit ChlH, chloroplastic (LOC18440867), mRNA	1475	86.68	1336	0	2414		XM_009391351.2	magnesium-chelatase subunit ChlH, chloroplastic (LOC103976149), mRNA	1419	88.59	1367	0	2500		XM_008663919.2	uncharacterized LOC100382191 (LOC100382191), transcript variant X1, mRNA	1379	86.15	1350	0	2404		XM_004236562.3	magnesium-chelatase subunit ChlH, chloroplastic (LOC101244176), mRNA	1381	86.01	1365	0	2449		NM_001281149.1	NM_001281149.1 length 1381 aa, 4146 bp, from 1..4146 of NM_001281149.1 Vitis vinifera magnesium chelatase H subunit (CHLH), mRNA	1381	88.28	1365	0	2494		XM_020567662.1	magnesium-chelatase subunit ChlH, chloroplastic (LOC18769443), mRNA	1380	87.33	1365	0	2467
	UN000463	XM_006854381.3	uncharacterized LOC18444205 (LOC18444205), mRNA	1334	47.96	832	0	608		XM_018822120.1	uncharacterized LOC103996359 (LOC103996359), transcript variant X2, mRNA	1144	42.65	1252	0	806		XM_020546520.1	uncharacterized LOC103640528 (LOC103640528), transcript variant X1, mRNA	1114	73.24	370	1e-179	560		XM_010328511.2	uncharacterized LOC101268228 (LOC101268228), mRNA	1235	66.84	392	4e-169	535		XM_010651926.2	uncharacterized LOC100264925 (LOC100264925), transcript variant X1, mRNA	1217	45.24	1302	0	881		XM_020553705.1	uncharacterized LOC18767493 (LOC18767493), mRNA	1266	78.26	368	0	588
	UN000464	XM_006828872.3	coatomer subunit alpha-1 (LOC18424283), transcript variant X1, mRNA	1216	88.02	1219	0	2155		XM_009402622.2	coatomer subunit alpha-3 (LOC103985015), transcript variant X2, mRNA	1216	83.46	1221	0	2076		XM_008648034.2	uncharacterized LOC100384351 (LOC100384351), transcript variant X1, mRNA	1292	80.75	1221	0	2012		XM_004238268.3	coatomer subunit alpha-1 (LOC101251283), mRNA	1218	84.17	1219	0	2102		XM_002279743.3	coatomer subunit alpha-1 (LOC100253944), mRNA	1217	85.07	1219	0	2132		XM_007210362.2	coatomer subunit alpha-1 (LOC18777882), mRNA	1218	85.15	1219	0	2126
	UN000465	XM_020668858.1	sister chromatid cohesion protein PDS5 homolog B (LOC18436768), transcript variant X1, mRNA	1474	50.53	1403	0	1257		XM_009386829.2	sister chromatid cohesion protein PDS5 homolog A-B (LOC103972476), transcript variant X2, mRNA	1395	49.13	1268	0	1127		XM_020550412.1	sister chromatid cohesion protein PDS5 homolog A (LOC103650955), transcript variant X3, mRNA	1327	48.18	1098	0	926		XM_010324613.2	sister chromatid cohesion protein PDS5 homolog A (LOC101250313), transcript variant X2, mRNA	1447	46.95	1378	0	1050		XM_010665916.2	sister chromatid cohesion protein PDS5 homolog A (LOC100255781), transcript variant X2, mRNA	1462	52.01	1494	0	1399		XM_020563273.1	sister chromatid cohesion protein PDS5 homolog A (LOC18791979), transcript variant X4, mRNA	1359	52.46	1361	0	1273
	UN000466	XM_006836501.3	ubiquitin carboxyl-terminal hydrolase 26 (LOC18427452), transcript variant X1, mRNA	1077	68.1	464	4e-178	550		XM_009384541.2	ubiquitin carboxyl-terminal hydrolase 26 (LOC103970668), transcript variant X1, mRNA	1080	71.27	463	0	564		XM_020540573.1	UBP26 (LOC100285328), transcript variant X6, mRNA	1057	67.26	452	2e-175	543		XM_004235021.3	ubiquitin carboxyl-terminal hydrolase 26 (LOC101264903), transcript variant X1, mRNA	1091	62.77	470	1e-171	533		XM_002283599.3	ubiquitin carboxyl-terminal hydrolase 26 (LOC100259355), transcript variant X3, mRNA	1103	67.79	475	2e-179	555		XM_020565982.1	ubiquitin carboxyl-terminal hydrolase 26 (LOC18789190), transcript variant X3, mRNA	940	68.91	460	3e-178	546
	UN000468	XM_020664262.1	kinesin-like protein KIN-14L (LOC18429003), transcript variant X2, mRNA	1156	75.55	1174	0	1711		XM_009415753.2	kinesin-like protein KCA2 (LOC103995217), mRNA	1372	74.52	1295	0	1902		XM_008660712.2	Kinesin-like protein KCA2 (pco131850(16)), transcript variant X1, mRNA	1351	70.76	1296	0	1771		XM_010314343.2	kinesin-like protein KIN-14B (LOC101245606), mRNA	1296	71.4	1290	0	1799		XM_010648494.2	kinesin-like protein KIN-14B (LOC100251513), mRNA	1298	77.49	1293	0	1976		XM_007208073.2	kinesin-like protein KIN-14B (LOC18773199), transcript variant X2, mRNA	1312	74.88	1298	0	1880
	UN000469	XM_006840249.3	squamosa promoter-binding-like protein 1 (LOC18430087), mRNA	1053	45.41	1057	0	710		XM_009394872.2	squamosa promoter-binding-like protein 6 (LOC103978914), mRNA	987	40.4	1042	0	647		XM_008668381.2	Squamosa promoter-binding-like protein 1 (LOC100272505), transcript variant X1, mRNA	972	37.62	1034	2e-172	530		XM_004229133.3	squamosa promoter-binding-like protein 1 (LOC101260569), mRNA	994	41.16	1052	0	648		XM_010654006.2	squamosa promoter-binding-like protein 1 (LOC100258912), mRNA	1016	41.44	1069	0	674		XM_007225333.2	squamosa promoter-binding-like protein 1 (LOC18788682), mRNA	1035	40.47	1055	0	622
	UN000471	XM_006826552.3	uncharacterized protein At4g26450 (LOC18421747), transcript variant X1, mRNA	795	26.85	365	1e-17	83.6		XM_018830052.1	uncharacterized protein At4g26450 (LOC103995859), mRNA	652	31.54	279	1e-24	104		XM_008671180.2	hypothetical protein (LOC103646446), transcript variant X1, mRNA	867	30.62	209	2e-13	71.2		XM_010328917.2	uncharacterized protein At4g26450 (LOC101254538), mRNA	727	33.94	274	3e-32	126		XM_019217272.1	uncharacterized protein At4g26450 (LOC100258275), transcript variant X3, mRNA	764	38.36	305	1e-47	170		XM_020565972.1	uncharacterized protein At4g26450 (LOC18773564), transcript variant X1, mRNA	751	36.04	308	2e-41	152
	UN000473	XM_006829173.3	uncharacterized LOC18424588 (LOC18424588), mRNA	481	52.42	330	3e-107	325		XM_009404007.2	uncharacterized LOC103986113 (LOC103986113), mRNA	436	67.57	367	2e-162	464		NM_001174439.1	NM_001174439.1 length 456 aa, 1371 bp, from 113..1483 of NM_001174439.1 Zea mays hypothetical protein (LOC100381622), mRNA	456	60.11	376	2e-131	386		XM_004235008.3	uncharacterized LOC101260516 (LOC101260516), mRNA	439	65.56	360	8e-157	450		XM_002276326.3	uncharacterized LOC100263234 (LOC100263234), mRNA	431	69.8	351	7e-163	465		XM_007220929.2	uncharacterized LOC18785123 (LOC18785123), mRNA	452	69.66	356	2e-160	459
	UN000475	XM_006848417.3	splicing regulatory glutamine/lysine-rich protein 1 (LOC18438228), transcript variant X3, mRNA	650	79.58	426	8e-169	488		XM_018827776.1	serine/arginine repetitive matrix protein 2 (LOC103989257), transcript variant X9, mRNA	1133	75	420	4e-155	468		XM_020550174.1	nipped-B-like protein B (LOC103649930), transcript variant X1, mRNA	924	59.48	348	5e-114	355		XM_019215662.1	splicing regulatory glutamine/lysine-rich protein 1 (LOC101244905), transcript variant X1, mRNA	897	78.15	421	1e-159	473		XM_019219432.1	uncharacterized LOC100244513 (LOC100244513), transcript variant X1, mRNA	926	84.56	421	2e-179	525		XM_020563152.1	splicing regulatory glutamine/lysine-rich protein 1 (LOC18789134), transcript variant X3, mRNA	963	81.09	423	8e-159	472
	UN000477	XM_011623139.2	DNA topoisomerase 2 (LOC18428924), transcript variant X2, mRNA	1504	73.61	1220	0	1821		XM_009401170.2	DNA topoisomerase 2-like (LOC103983855), mRNA	1466	75.45	1214	0	1833		XM_008682981.2	DNA topoisomerase 2 (LOC100193866), transcript variant X1, mRNA	1431	71.04	1181	0	1684		XM_004229596.3	DNA topoisomerase 2 (LOC101250733), transcript variant X2, mRNA	1477	69.9	1239	0	1741		XM_002274231.4	DNA topoisomerase 2 (LOC100253371), mRNA	1489	73.65	1256	0	1851		XM_007220520.2	DNA topoisomerase 2 (LOC18786685), transcript variant X2, mRNA	1471	73.08	1200	0	1772
	UN000478	XM_020665445.1	helicase-like transcription factor CHR28 (LOC18431545), transcript variant X3, mRNA	832	68.48	825	0	1069		XM_009394108.2	helicase-like transcription factor CHR28 (LOC103978331), transcript variant X3, mRNA	1082	62.69	898	0	1026		XM_020542366.1	helicase-like transcription factor CHR28 (LOC103636595), transcript variant X2, mRNA	1238	61.07	863	0	1000		XM_004234211.3	helicase-like transcription factor CHR28 (LOC101251257), mRNA	1328	65.34	877	0	1055		XM_002262991.4	helicase-like transcription factor CHR28 (LOC100265351), transcript variant X1, mRNA	1435	69.23	910	0	1191		XM_020563233.1	helicase-like transcription factor CHR28 (LOC18778709), mRNA	1393	65.96	937	0	1131
	UN000480	XM_011623282.2	splicing factor 3B subunit 3 (LOC18429452), transcript variant X2, mRNA	1396	62.68	777	0	929		XM_009418881.2	uncharacterized LOC103997605 (LOC103997605), mRNA	1587	63.17	782	0	974		XM_008653953.2	splicing factor 3B subunit 3 (LOC103632101), transcript variant X2, mRNA	1360	52.56	761	0	776		XM_010313853.2	pre-mRNA-splicing factor prp12 (LOC101261183), transcript variant X1, mRNA	1393	61.17	783	0	943		XM_010655550.2	pre-mRNA-splicing factor prp12 (LOC100252096), transcript variant X1, mRNA	1397	67.96	774	0	1047		XM_007204237.2	splicing factor 3B subunit 3 (LOC18769711), mRNA	1386	66.14	765	0	993
	UN000482	XM_006849258.3	calcium-transporting ATPase 1, plasma membrane-type (LOC18439083), mRNA	1035	82.51	1018	0	1665		XM_009397767.2	calcium-transporting ATPase 1, plasma membrane-type-like (LOC103981149), transcript variant X1, mRNA	1040	81.04	1018	0	1659		NM_001321487.1	NM_001321487.1 length 1036 aa, 3111 bp, from 181..3291 of NM_001321487.1 Zea mays calcium-transporting ATPase 1, plasma membrane-type (LOC103640509), mRNA	1036	79.17	1018	0	1610		XM_010321996.2	calcium-transporting ATPase 1, chloroplastic (LOC101260132), mRNA	1022	80.16	1018	0	1625		XM_002284393.4	Ca2+-transporting ATPase-like (LOC100247373), mRNA	1019	82.12	1018	0	1657		XM_007225326.2	calcium-transporting ATPase 1, chloroplastic (LOC18789462), mRNA	1016	80.92	1017	0	1637
	UN000485	XM_006850126.3	xanthine dehydrogenase 1 (LOC18439972), transcript variant X1, mRNA	1366	76.22	1350	0	1967		XM_009407760.2	xanthine dehydrogenase (LOC103989027), mRNA	1387	74.13	1349	0	1934		XM_008659233.2	xanthine dehydrogenase (LOC100384368), mRNA	1371	73.8	1351	0	1906		XM_004250902.3	xanthine dehydrogenase 1-like (LOC101252457), mRNA	1369	74.28	1349	0	1960		XM_002285437.3	xanthine dehydrogenase 1 (LOC100248547), mRNA	1386	76.72	1349	0	2026		XM_007213673.2	xanthine dehydrogenase 1 (LOC18780893), transcript variant X1, mRNA	1369	75.09	1349	0	1966
	UN000486	XM_006855324.3	uncharacterized LOC18445183 (LOC18445183), transcript variant X1, mRNA	1095	35.03	708	6e-104	348		XM_009383760.2	uncharacterized LOC103970110 (LOC103970110), transcript variant X1, mRNA	1054	35.66	1091	0	561		NM_001347051.1	NM_001347051.1 length 947 aa, 2844 bp, from 478..3321 of NM_001347051.1 Zea mays DNAJ heat shock N-terminal domain-containing protein (LOC103650196), mRNA	947	33.6	1000	3e-155	482		XM_004244852.3	uncharacterized LOC101266847 (LOC101266847), transcript variant X1, mRNA	807	36.68	728	7e-133	419		XM_010651498.2	uncharacterized LOC100244334 (LOC100244334), transcript variant X1, mRNA	1050	37.83	1089	0	633		XM_020566154.1	uncharacterized LOC18772858 (LOC18772858), transcript variant X1, mRNA	1115	33	694	2e-98	333
	UN000487	XM_020671943.1	eIF-2-alpha kinase GCN2 (LOC18441823), transcript variant X1, mRNA	1270	59.82	1247	0	1411		XM_018823643.1	eIF-2-alpha kinase GCN2 (LOC103978507), transcript variant X1, mRNA	1263	60.26	1243	0	1406		XM_008671010.2	eIF-2-alpha kinase GCN2 (LOC103646282), transcript variant X2, mRNA	1250	60.04	926	0	1102		XM_010314789.2	eIF-2-alpha kinase GCN2 (LOC101246209), transcript variant X1, mRNA	1227	64.76	925	0	1231		XM_002264803.4	eIF-2-alpha kinase GCN2 (LOC100249259), transcript variant X1, mRNA	1244	63.81	1238	0	1481		XM_020554110.1	eIF-2-alpha kinase GCN2 (LOC18792786), transcript variant X1, mRNA	1243	64.42	1245	0	1532
	UN000489	XM_011626519.2	DExH-box ATP-dependent RNA helicase DExH11 (LOC18437824), mRNA	1469	74.57	1046	0	1526		XM_009417938.2	DExH-box ATP-dependent RNA helicase DExH11 (LOC103996886), mRNA	1341	72.08	1354	0	1934		XM_008645898.2	DExH-box ATP-dependent RNA helicase DExH11 (pco124991(180)), transcript variant X2, mRNA	1368	63.33	1377	0	1681		XM_010323443.2	DExH-box ATP-dependent RNA helicase DExH11 (LOC101264125), transcript variant X3, mRNA	1361	70.18	1368	0	1866		XM_010652644.2	DExH-box ATP-dependent RNA helicase DExH11 (LOC100253599), mRNA	1354	73.99	1361	0	1950		XM_007204887.2	DExH-box ATP-dependent RNA helicase DExH11 (LOC18772627), transcript variant X3, mRNA	1357	72.68	1358	0	1905
	UN000490	XM_006828170.3	uncharacterized LOC18423569 (LOC18423569), transcript variant X1, mRNA	1355	42.2	455	5e-81	293		XM_009389164.2	uncharacterized LOC103974356 (LOC103974356), mRNA	1339	48.46	357	7e-77	280		XM_008658319.2	hypothetical protein (LOC103635951), mRNA	1422	53.95	152	6e-46	182		XM_010315236.2	uncharacterized LOC101255762 (LOC101255762), transcript variant X3, mRNA	1333	43.54	418	6e-80	290		XM_002284593.4	uncharacterized LOC100250176 (LOC100250176), mRNA	1393	50	418	8e-101	353		XM_020565471.1	uncharacterized LOC18772004 (LOC18772004), transcript variant X1, mRNA	1384	46.5	400	8e-86	308
	UN000491	XM_011630375.1	protein TIME FOR COFFEE (LOC18448549), transcript variant X1, mRNA	824	36.4	555	3e-53	199		XM_018826396.1	protein TIME FOR COFFEE (LOC103984966), transcript variant X2, mRNA	1533	34.03	238	3e-17	87.8		NM_001348675.1	NM_001348675.1 length 1590 aa, 4773 bp, from 168..4940 of NM_001348675.1 Zea mays Protein TIME FOR COFFEE (LOC100381721), mRNA	1590	29.8	255	1e-12	73.2		XM_010328254.2	protein TIME FOR COFFEE (LOC101257597), transcript variant X2, mRNA	1685	33.21	262	7e-15	79.7		XM_002272696.4	protein TIME FOR COFFEE (LOC100252941), transcript variant X1, mRNA	1318	35.86	251	2e-20	97.8		XM_007225415.2	protein TIME FOR COFFEE (LOC18791247), transcript variant X2, mRNA	1621	27.23	716	3e-22	103
	UN000493	XM_006842150.3	systemin receptor SR160 (LOC18432040), mRNA	1226	50.8	1185	0	998		XM_009387216.2	receptor-like protein kinase BRI1-like 3 (LOC103972837), transcript variant X1, mRNA	1217	65.77	1183	0	1465		XM_008654299.2	brassinosteroid LRR receptor kinase BRL1 (LOC103632518), transcript variant X1, mRNA	1282	62.66	1173	0	1310		XM_004244278.3	receptor-like protein kinase BRI1-like 3 (LOC101258083), mRNA	1192	62.38	1191	0	1354		XM_002265489.4	receptor-like protein kinase BRI1-like 3 (LOC100249741), mRNA	1211	69.12	1182	0	1469		XM_020566454.1	receptor-like protein kinase BRI1-like 3 (LOC18772962), mRNA	1211	66.53	1183	0	1464
	UN000495	XM_006850004.3	linoleate 13S-lipoxygenase 2-1, chloroplastic (LOC18439847), mRNA	906	68.08	827	0	1167		XM_009393606.2	linoleate 13S-lipoxygenase 2-1, chloroplastic (LOC103977941), mRNA	907	70.68	822	0	1220		XM_008665354.2	probable lipoxygenase 8, chloroplastic (LOC103642039), mRNA	956	59.48	844	0	1036		NM_001246883.2	NM_001246883.2 length 896 aa, 2691 bp, from 43..2733 of NM_001246883.2 Solanum lycopersicum lipoxygenase (TomloxC), mRNA	896	64.3	818	0	1098		XM_002263818.3	linoleate 13S-lipoxygenase 2-1, chloroplastic (LOC100257867), mRNA	909	71.79	819	0	1249		XM_007220923.2	linoleate 13S-lipoxygenase 2-1, chloroplastic (LOC18787140), mRNA	920	68.57	910	0	1261
	UN000496	XM_011625094.2	cyclin-dependent kinase G-2 (LOC18434328), transcript variant X1, mRNA	751	70.75	506	0	709		XM_009413564.2	cyclin-dependent kinase G-2-like (LOC103993477), transcript variant X1, mRNA	777	60.47	764	0	792		XM_008665128.2	cyclin-dependent kinase G-2-like (LOC103641791), transcript variant X6, mRNA	649	71.98	489	0	683		XM_010322685.2	cyclin-dependent kinase G-2 (LOC101262718), transcript variant X1, mRNA	840	64.14	647	0	743		XM_019221819.1	cyclin-dependent kinase G-2 (LOC100246062), transcript variant X1, mRNA	754	68.59	761	0	879		XM_020557536.1	cyclin-dependent kinase G-2 (LOC18793041), transcript variant X5, mRNA	751	64.72	754	0	846
	UN000497	XM_011628135.2	symplekin (LOC18442422), transcript variant X1, mRNA	1336	60.46	1348	0	1423		XM_009389811.2	symplekin-like (LOC103974908), mRNA	463	71.77	464	0	671		XM_020550034.1	hypothetical protein (LOC103651305), transcript variant X2, mRNA	1169	54.27	715	0	701		XM_010322217.2	uncharacterized LOC101249356 (LOC101249356), mRNA	1325	66.22	669	0	838		XM_010666151.2	uncharacterized LOC100266091 (LOC100266091), transcript variant X3, mRNA	1335	61.93	1350	0	1458		XM_020560439.1	uncharacterized LOC18789207 (LOC18789207), transcript variant X2, mRNA	1342	60.77	1356	0	1468
	UN000498	---	---	0	---	---	---	---		XM_018825197.1	nuclear pore complex protein GP210 (LOC103981790), transcript variant X2, mRNA	1983	57.75	71	3e-16	85.9		NM_001349059.1	NM_001349059.1 length 1916 aa, 5751 bp, from 8..5758 of NM_001349059.1 Zea mays uncharacterized LOC100384390 (LOC100384390), mRNA	1916	65.91	44	2e-10	67		XM_004233821.3	nuclear pore complex protein GP210 (LOC101260108), mRNA	1948	55.71	70	2e-13	76.6		XM_010662553.2	nuclear pore complex protein GP210 (LOC100257580), mRNA	2366	60.32	63	7e-12	71.2		XM_007214834.2	nuclear pore complex protein GP210 (LOC18784266), mRNA	1963	57.41	54	3e-09	62.4
	UN000499	XM_006841370.3	FIP1[V]-like protein (LOC18431242), mRNA	1203	46.13	349	1e-71	245		XM_009398172.2	FIP1[V]-like protein (LOC103981443), mRNA	1406	38.28	303	9e-50	182		XM_020546910.1	FIP1[V]-like protein (LOC103645590), mRNA	1271	33.99	353	7e-33	133		XM_004242523.3	FIP1[V]-like protein (LOC101261244), mRNA	1380	38.08	260	2e-39	152		XM_019220113.1	FIP1[III]-like protein (LOC100258583), transcript variant X2, mRNA	1294	40.27	452	3e-85	285		XM_020555554.1	FIP1[III]-like protein (LOC18788835), transcript variant X1, mRNA	1167	34.86	459	5e-52	189
	UN000500	XM_006826365.3	nuclear pore complex protein NUP1 (LOC18421616), transcript variant X1, mRNA	1361	34.61	549	9e-54	198		XM_009391161.2	nuclear pore complex protein NUP1-like (LOC103975998), mRNA	1363	40.04	472	4e-61	220		XM_008667343.2	nuclear pore complex protein NUP1-like (LOC103644146), mRNA	1336	30.96	407	7e-26	114		XM_010314201.2	nuclear pore complex protein NUP1 (LOC101267283), mRNA	1318	39.18	388	4e-46	175		XM_002264126.4	nuclear pore complex protein NUP1 (LOC100261025), mRNA	1307	40.64	625	1e-75	262		XM_020556153.1	nuclear pore complex protein NUP1 (LOC18779369), mRNA	1308	37.41	441	1e-46	176
	UN000501	XM_020668360.1	elongator complex protein 1 (LOC18435979), transcript variant X1, mRNA	1334	60.04	1354	0	1516		XM_009417975.2	elongator complex protein 1 (LOC103996912), mRNA	1328	62.52	1334	0	1563		XM_008668903.2	U-box domain-containing protein 33 (IDP267), transcript variant X1, mRNA	1336	55.77	1352	0	1416		XM_004239729.3	elongator complex protein 1 (LOC101260050), transcript variant X1, mRNA	1328	60.41	1331	0	1520		XM_002279226.3	elongator complex protein 1 (LOC100247912), mRNA	1322	64.59	1333	0	1637		XM_007220240.2	elongator complex protein 1 (LOC18787549), mRNA	1314	61.57	1335	0	1540
	UN000502	XM_006856210.3	phytochrome C (LOC18446108), mRNA	1126	78.62	1099	0	1782		XM_009404558.2	phytochrome C (LOC103986543), mRNA	1143	76.67	1106	0	1758		XM_008667204.2	phytochrome C (LOC103644014), mRNA	1142	71.8	1103	0	1645		NM_001320517.1	NM_001320517.1 length 1118 aa, 3357 bp, from 510..3866 of NM_001320517.1 Solanum lycopersicum phytochrome F (PHYF), mRNA	1118	70.23	1095	0	1605		XM_002268688.4	phytochrome C (LOC100258014), mRNA	1118	78.51	1098	0	1777		XM_007217080.2	phytochrome C (LOC18782269), transcript variant X4, mRNA	1130	75.02	1101	0	1695
	UN000503	XM_011630714.2	uncharacterized LOC18421494 (LOC18421494), mRNA	1290	46.66	1361	0	980		XM_009385735.2	uncharacterized LOC103971660 (LOC103971660), transcript variant X1, mRNA	1318	75.46	489	0	731		XM_008666262.2	salt-inducible protein kinase (STY2), transcript variant X1, mRNA	1246	47.42	1318	0	898		XM_010317372.2	uncharacterized LOC101248436 (LOC101248436), mRNA	1245	45.37	1263	0	872		XM_002276201.4	uncharacterized LOC100242423 (LOC100242423), transcript variant X1, mRNA	1341	56.12	1356	0	1291		XM_007213669.2	uncharacterized LOC18781339 (LOC18781339), mRNA	1363	53.85	1363	0	1251
	UN000504	XM_020672761.1	uncharacterized LOC18443047 (LOC18443047), transcript variant X4, mRNA	1362	37.21	551	1e-73	255		XM_009413768.2	uncharacterized LOC103993633 (LOC103993633), mRNA	1483	36.46	288	3e-28	120		NM_001176773.1	NM_001176773.1 length 448 aa, 1347 bp, from 32..1378 of NM_001176773.1 Zea mays uncharacterized LOC100384198 (LOC100384198), mRNA	448	28.87	433	1e-33	133		XM_004231607.3	uncharacterized LOC101249691 (LOC101249691), mRNA	1420	30.91	537	3e-48	181		XM_010650170.2	uncharacterized LOC100261159 (LOC100261159), mRNA	1494	35.96	570	3e-75	260		XM_020561382.1	uncharacterized LOC18778717 (LOC18778717), transcript variant X2, mRNA	1384	33.21	563	4e-60	216
	UN000505	XM_020669804.1	DNA repair protein RAD50 (LOC18438248), transcript variant X3, mRNA	1336	74.75	1303	0	1913		XM_009418311.2	DNA repair protein RAD50 (LOC103997159), transcript variant X1, mRNA	1316	82.75	1316	0	2154		XM_008680436.2	DNA repair protein RAD50 (LOC103653563), transcript variant X2, mRNA	1341	68.69	1316	0	1750		XM_010323104.2	DNA repair protein RAD50 (LOC101256382), transcript variant X1, mRNA	1316	71.43	1316	0	1867		XM_002266629.4	DNA repair protein RAD50 (LOC100243413), mRNA	1321	79.71	1316	0	2053		XM_020566619.1	DNA repair protein RAD50 (LOC18790916), mRNA	1316	73.33	1316	0	1884
	UN000506	XM_006858684.3	FRIGIDA-like protein 3 (LOC18448623), mRNA	544	44.01	284	8e-61	203		XM_018826851.1	truncated FRIGIDA-like protein 1 (LOC103989022), mRNA	494	56.27	263	8e-88	272		NM_001158430.1	NM_001158430.1 length 547 aa, 1644 bp, from 141..1784 of NM_001158430.1 Zea mays ABI3-interacting protein 2 (LOC100285539), mRNA	547	41.64	293	4e-49	172		XM_004240394.3	FRIGIDA-like protein 3 (LOC101252492), mRNA	584	42.76	283	2e-54	187		XM_010665477.2	FRIGIDA-like protein 2 (LOC104882370), mRNA	394	49.07	269	5e-62	203		XM_020563094.1	FRIGIDA-like protein 1 (LOC18779282), mRNA	588	57.14	266	4e-76	244
	UN000508	XM_020673576.1	protein PIR (LOC18444008), transcript variant X1, mRNA	1298	78.14	1290	0	2056		XM_009396843.2	protein PIR (LOC103980423), transcript variant X2, mRNA	1290	78.67	1289	0	2090		XM_008649421.2	uncharacterized LOC100502300 (LOC100502300), transcript variant X1, mRNA	1285	76.8	1289	0	2021		XM_004250294.2	protein PIR (LOC101253443), transcript variant X1, mRNA	1287	80.22	1289	0	2138		XM_010650650.2	protein PIR (LOC100253517), mRNA	1292	81.29	1288	0	2163		XM_020565024.1	protein PIR (LOC18775246), mRNA	1291	80.98	1288	0	2166
	UN000509	---	---	0	---	---	---	---		---	---	0	---	---	---	---		---	---	0	---	---	---	---		---	---	0	---	---	---	---		XM_019218790.1	photosystem II CP47 reaction center protein-like (LOC109122277), mRNA	203	92	25	2e-09	53.1		---	---	0	---	---	---	---
	UN000512	XM_011623012.2	serine/threonine-protein kinase EDR1 (LOC18428689), mRNA	1068	85.19	324	0	582		XM_009382657.2	serine/threonine-protein kinase EDR1-like (LOC103969189), transcript variant X2, mRNA	928	78.06	319	5e-169	521		XM_008648027.2	serine/threonine-protein kinase EDR1 (LOC103627717), mRNA	1146	79.62	314	1e-166	521		XM_010320329.2	serine/threonine-protein kinase EDR1 (LOC101263689), transcript variant X4, mRNA	875	80.43	327	6e-179	545		XM_010665372.2	serine/threonine-protein kinase EDR1 (LOC100854850), transcript variant X10, mRNA	906	60.91	550	0	586		XM_020563627.1	serine/threonine-protein kinase EDR1 (LOC18776750), transcript variant X4, mRNA	1003	60.68	557	0	586
	UN000514	XM_011626888.2	zinc finger CCCH domain-containing protein 19 (LOC18439028), mRNA	1359	58.01	805	0	856		XM_009397097.2	zinc finger CCCH domain-containing protein 19-like (LOC103980643), mRNA	2149	60.88	800	0	920		XM_008659006.2	zinc finger CCCH domain-containing protein 19 (LOC103636656), transcript variant X1, mRNA	1746	54.02	820	0	793		XM_010314914.2	zinc finger CCCH domain-containing protein 19 (LOC101249239), transcript variant X1, mRNA	1718	56.96	783	0	813		XM_010650776.2	zinc finger CCCH domain-containing protein 44 (LOC100252322), mRNA	1522	60.86	787	0	877		XM_020553881.1	zinc finger CCCH domain-containing protein 19 (LOC18768264), mRNA	1597	60.87	782	0	886
	UN000517	XM_011628687.2	SNF2 domain-containing protein CLASSY 1 (LOC18423454), transcript variant X1, mRNA	1325	41.12	214	2e-37	145		XM_009414353.2	SNF2 domain-containing protein CLASSY 1-like (LOC103994075), mRNA	1199	35.71	280	1e-41	157		XM_008655307.2	SNF2 domain-containing protein CLASSY 1 (LOC103633601), transcript variant X2, mRNA	1247	35.21	284	3e-40	154		XM_010323849.2	SNF2 domain-containing protein CLASSY 1-like (LOC101262122), transcript variant X1, mRNA	1287	41.81	232	7e-51	184		XM_010659915.2	SNF2 domain-containing protein CLASSY 1 (LOC100250037), transcript variant X1, mRNA	1263	40.94	254	8e-51	184		XM_007218827.2	SNF2 domain-containing protein CLASSY 1 (LOC18786216), transcript variant X1, mRNA	1312	33.09	272	6e-41	155
	UN000518	XM_006826473.3	protein CHROMATIN REMODELING 4 (LOC18421489), transcript variant X1, mRNA	2287	58.84	1436	0	1510		XM_018827560.1	protein CHROMATIN REMODELING 4 (LOC103989414), transcript variant X8, mRNA	2100	64.95	1070	0	1372		XM_020548571.1	protein CHROMATIN REMODELING 4 (LOC103647692), transcript variant X2, mRNA	2104	63.68	1060	0	1303		XM_010318738.2	protein CHROMATIN REMODELING 4 (LOC101248171), transcript variant X2, mRNA	2355	57.07	1472	0	1502		XM_003631145.3	protein CHROMATIN REMODELING 4 (LOC100247555), transcript variant X1, mRNA	2355	62.93	1462	0	1686		XM_020563114.1	protein CHROMATIN REMODELING 4 (LOC18780359), transcript variant X1, mRNA	2337	59.78	1462	0	1574
	UN000520	XM_020674138.1	DNA polymerase zeta catalytic subunit (LOC18445266), transcript variant X1, mRNA	2025	61.39	1194	0	1415		XM_018820903.1	DNA polymerase zeta catalytic subunit (LOC103971955), transcript variant X2, mRNA	1991	58.35	1275	0	1402		XM_020540860.1	DNA polymerase zeta catalytic subunit (LOC103633541), transcript variant X7, mRNA	1609	58.3	1168	0	1332		XM_010314532.2	DNA polymerase zeta catalytic subunit (LOC101266467), transcript variant X4, mRNA	1746	61.95	1188	0	1409		XM_010661561.2	DNA polymerase zeta catalytic subunit (LOC100263126), transcript variant X4, mRNA	1835	74.51	965	0	1447		XM_020567423.1	DNA polymerase zeta catalytic subunit (LOC18775502), mRNA	2710	63.57	1164	0	1428
	UN000521	XM_020661861.1	phosphatidate phosphatase PAH2 (LOC18425103), mRNA	1421	57.69	624	0	659		XM_009405729.2	phosphatidate phosphatase PAH2-like (LOC103987430), transcript variant X4, mRNA	1257	56.88	603	0	636		XM_008679737.2	phosphatidate phosphatase PAH2 (LOC103652775), transcript variant X3, mRNA	1254	56.37	534	0	611		XM_010327742.2	phosphatidate phosphatase PAH1-like (LOC101243737), transcript variant X1, mRNA	907	59.38	421	3e-176	523		XM_010666275.2	phosphatidate phosphatase PAH2 (LOC100266011), transcript variant X3, mRNA	1169	56.75	615	0	644		XM_007208304.2	phosphatidate phosphatase PAH1 (LOC18772211), mRNA	912	61.76	408	6e-171	509
	UN000523	XM_020669332.1	uncharacterized LOC18437573 (LOC18437573), mRNA	1759	58.25	515	0	600		XM_009393965.2	lysine-specific demethylase JMJ25-like (LOC103978241), transcript variant X2, mRNA	1214	58.29	537	0	634		XM_008666829.2	Transcription factor jumonji (jmjC) domain-containing protein (LOC103643664), transcript variant X3, mRNA	1060	51.55	547	0	555		XM_004237501.3	lysine-specific demethylase JMJ25-like (LOC101260929), transcript variant X1, mRNA	1121	53.57	560	0	607		XM_010650565.2	lysine-specific demethylase JMJ25 (LOC100244450), transcript variant X3, mRNA	1152	59.4	532	0	638		XM_007210890.2	lysine-specific demethylase JMJ25 (LOC18775974), mRNA	976	54.34	541	0	591
	UN000524	XM_020676259.1	sister chromatid cohesion 1 protein 4 (LOC18448700), transcript variant X2, mRNA	1347	61.49	322	6e-108	364		XM_009385080.2	sister chromatid cohesion 1 protein 4 (LOC103971123), transcript variant X1, mRNA	1233	43.61	924	0	561		XM_008674963.2	Sister chromatid cohesion 1 protein 4 (umc1400), transcript variant X2, mRNA	1176	61.01	336	2e-104	352		XM_010314317.2	sister chromatid cohesion 1 protein 4 (LOC101252346), transcript variant X1, mRNA	1279	82.16	213	6e-107	360		XM_010648150.2	sister chromatid cohesion 1 protein 4 (LOC100263480), mRNA	1271	43.08	982	0	584		XM_020566326.1	sister chromatid cohesion 1 protein 4 (LOC18773965), mRNA	1154	95.14	185	9e-113	374
	UN000525	XM_006841110.3	CHD3-type chromatin-remodeling factor PICKLE (LOC18430971), transcript variant X1, mRNA	1585	66.69	1366	0	1717		XM_009400266.2	CHD3-type chromatin-remodeling factor PICKLE (LOC103983099), mRNA	1371	64.08	1353	0	1578		XM_008660980.2	CHD3-type chromatin-remodeling factor PICKLE (LOC103637982), transcript variant X2, mRNA	1329	56.29	1320	0	1349		XM_004244843.3	CHD3-type chromatin-remodeling factor PICKLE-like (LOC101263831), mRNA	1463	66.89	1368	0	1718		XM_002282882.4	CHD3-type chromatin-remodeling factor PICKLE (LOC100261114), mRNA	1472	71.12	1347	0	1834		XM_020567162.1	CHD3-type chromatin-remodeling factor PICKLE (LOC18789278), transcript variant X1, mRNA	1439	69.2	1341	0	1766
	UN000527	XM_006850734.3	RNA polymerase II transcription subunit 33A (LOC18440596), mRNA	1327	66.21	1302	0	1519		XM_009408374.2	mediator of RNA polymerase II transcription subunit 33A-like (LOC103989505), transcript variant X1, mRNA	1327	69.98	1296	0	1637		NM_001323915.1	NM_001323915.1 length 1370 aa, 4113 bp, from 32..4144 of NM_001323915.1 Zea mays uncharacterized LOC100275134 (LOC100275134), mRNA	1370	60.77	1216	0	1306		XM_010324435.2	mediator of RNA polymerase II transcription subunit 33A (LOC101260265), mRNA	1342	65.62	1306	0	1484		XM_010653824.2	mediator of RNA polymerase II transcription subunit 33A (LOC100254459), transcript variant X1, mRNA	1366	69.27	1308	0	1667		XM_007225393.2	mediator of RNA polymerase II transcription subunit 33A (LOC18788819), mRNA	1326	68.3	1309	0	1621
	UN000528	XM_011628005.2	uncharacterized protein At4g10930 (LOC18442356), transcript variant X1, mRNA	1299	43.29	850	0	582		XM_009395907.2	uncharacterized protein At4g10930 (LOC103979719), transcript variant X2, mRNA	1404	42.38	781	2e-150	493		XM_020552959.1	uncharacterized protein At4g10930 (LOC103656040), transcript variant X4, mRNA	1263	58.41	226	2e-79	288		XM_019211583.1	uncharacterized protein At4g10930 (LOC101262701), transcript variant X4, mRNA	1247	56.74	282	3e-97	341		XM_010661107.2	uncharacterized protein At4g10930 (LOC100254675), transcript variant X1, mRNA	1314	46.8	797	0	613		XM_020564203.1	uncharacterized protein At4g10930 (LOC18777818), transcript variant X1, mRNA	1356	44.06	867	3e-180	572
	UN000531	XM_006842778.3	uncharacterized LOC18432675 (LOC18432675), transcript variant X1, mRNA	1039	65.07	1042	0	1334		XM_009408543.2	putative disease resistance RPP13-like protein 1 (LOC103989634), mRNA	1267	25.93	270	6e-13	74.3		NM_001350169.1	NM_001350169.1 length 1041 aa, 3126 bp, from 245..3370 of NM_001350169.1 Zea mays uncharacterized LOC100276434 (LOC100276434), mRNA	1041	58.49	1043	0	1204		XM_004236910.2	putative late blight resistance protein homolog R1B-23 (LOC101247515), mRNA	869	24.86	346	3e-15	81.3		XM_003632758.3	uncharacterized LOC100261821 (LOC100261821), transcript variant X1, mRNA	1058	71.8	1046	0	1490		XM_020560811.1	uncharacterized LOC18783952 (LOC18783952), transcript variant X1, mRNA	1053	66.67	1029	0	1393
	UN000532	XM_020664363.1	eukaryotic translation initiation factor 4G (LOC18429102), transcript variant X1, mRNA	1994	48.65	520	1e-112	394		XM_018820711.1	eukaryotic translation initiation factor 4G-like (LOC103970037), transcript variant X2, mRNA	1957	45.99	1522	0	931		XM_020548578.1	eukaryotic translation initiation factor 4G (LOC103647746), transcript variant X3, mRNA	1804	59.54	482	2e-143	483		XM_004229669.3	eukaryotic translation initiation factor 4G (LOC101248714), mRNA	1819	60.13	479	3e-138	468		XM_010663120.2	eukaryotic translation initiation factor 4G (LOC100261523), transcript variant X4, mRNA	1936	48.99	1529	0	1042		XM_020557929.1	eukaryotic translation initiation factor 4G (LOC18786280), mRNA	1872	63.4	470	6e-157	521
	UN000533	XM_020671487.1	DExH-box ATP-dependent RNA helicase DExH7, chloroplastic (LOC18440839), transcript variant X2, mRNA	1454	62.83	1337	0	1536		XM_018828036.1	DExH-box ATP-dependent RNA helicase DExH7, chloroplastic (LOC103988090), transcript variant X6, mRNA	1421	60.74	1332	0	1496		XM_008671177.2	DExH-box ATP-dependent RNA helicase DExH7, chloroplastic (LOC103646444), transcript variant X2, mRNA	1424	58.02	1341	0	1406		XM_010316274.2	DExH-box ATP-dependent RNA helicase DExH7, chloroplastic (LOC101259204), mRNA	1475	63.17	1344	0	1567		XM_002263853.3	DExH-box ATP-dependent RNA helicase DExH7, chloroplastic (LOC100247318), transcript variant X2, mRNA	1458	66.25	1348	0	1665		XM_020553900.1	DExH-box ATP-dependent RNA helicase DExH7, chloroplastic (LOC18792385), transcript variant X1, mRNA	1433	64.88	1347	0	1614
	UN000534	XM_006849706.3	protein CROWDED NUCLEI 1 (LOC18439542), mRNA	1290	41.05	1330	0	606		XM_009405655.2	protein CROWDED NUCLEI 1 (LOC103987369), mRNA	1251	40.23	1285	0	618		XM_008680800.2	protein CROWDED NUCLEI 1 (LOC103653975), transcript variant X1, mRNA	1157	35.23	1127	3e-121	404		XM_004234639.3	protein CROWDED NUCLEI 1-like (LOC101255471), transcript variant X1, mRNA	1169	40.36	1125	4e-174	546		XM_010649745.2	protein CROWDED NUCLEI 1 (LOC100242259), transcript variant X1, mRNA	1233	46.26	1269	0	759		XM_020560887.1	protein CROWDED NUCLEI 1 (LOC18784255), mRNA	1206	43.85	1284	0	682
	UN000535	XM_006849009.3	HSP-interacting protein (LOC18438833), mRNA	777	58.46	780	0	771		XM_018830769.1	uncharacterized LOC103994596 (LOC103994596), transcript variant X2, mRNA	798	64.01	764	0	793		NM_001136822.1	NM_001136822.1 length 753 aa, 2262 bp, from 75..2336 of NM_001136822.1 Zea mays uncharacterized LOC100191388 (csu909), mRNA	753	57.53	777	0	733		XM_004232631.3	uncharacterized LOC101268827 (LOC101268827), mRNA	778	62.94	769	0	827		XM_002262941.4	HSP-interacting protein (LOC100248831), mRNA	714	45.68	475	2e-124	389		XM_020561700.1	HSP-interacting protein (LOC18778854), transcript variant X1, mRNA	772	67.24	757	0	869
	UN000536	XM_020662084.1	uncharacterized LOC18425593 (LOC18425593), transcript variant X1, mRNA	1513	44.9	1285	0	866		XM_009419363.2	uncharacterized LOC103998002 (LOC103998002), transcript variant X4, mRNA	1491	45.69	1346	0	957		XM_008648099.2	PHD finger family protein (LOC103627799), transcript variant X2, mRNA	1528	39.8	1314	0	748		XM_004250305.3	uncharacterized LOC101257427 (LOC101257427), mRNA	1467	47.16	1287	0	949		XM_010665963.2	uncharacterized LOC100245365 (LOC100245365), transcript variant X1, mRNA	1555	49.22	1404	0	1111		XM_020553588.1	uncharacterized LOC18790221 (LOC18790221), transcript variant X1, mRNA	1531	48.24	1281	0	991
	UN000537	XM_006827105.3	ABC transporter B family member 19 (LOC18422433), mRNA	1252	85.1	1242	0	2018		XM_009397647.2	ABC transporter B family member 19 (LOC103981063), mRNA	1266	87.49	1247	0	2055		NM_001176189.1	NM_001176189.1 length 1264 aa, 3795 bp, from 160..3954 of NM_001176189.1 Zea mays uncharacterized LOC100383541 (LOC100383541), mRNA	1264	85.22	1231	0	2024		NM_001247280.1	NM_001247280.1 length 1249 aa, 3750 bp, from 278..4027 of NM_001247280.1 Solanum lycopersicum L04 (MDR1), mRNA	1249	88	1242	0	2103		XM_002283015.4	ABC transporter B family member 19 (LOC100262734), mRNA	1269	90.1	1243	0	2137		XM_007217589.2	ABC transporter B family member 19 (LOC18782071), mRNA	1249	88.57	1242	0	2077
	UN000538	XM_020674805.1	uncharacterized LOC18446213 (LOC18446213), transcript variant X2, mRNA	1546	36.07	682	3e-114	385		XM_018824788.1	uncharacterized LOC103983471 (LOC103983471), mRNA	1383	48.47	458	6e-116	388		XM_008671804.2	DNA binding (LOC103647245), transcript variant X1, mRNA	1207	40.34	414	6e-88	307		XM_010322548.1	uncharacterized LOC101261411 (LOC101261411), transcript variant X5, mRNA	1513	36.55	591	4e-105	359		XM_019219336.1	uncharacterized LOC100268093 (LOC100268093), transcript variant X8, mRNA	982	43.32	644	5e-149	468		XM_020560778.1	uncharacterized LOC18791472 (LOC18791472), transcript variant X1, mRNA	1255	37.1	1019	3e-158	499
	UN000539	XM_011623012.2	serine/threonine-protein kinase EDR1 (LOC18428689), mRNA	1068	60.18	1105	0	1104		XM_009382655.2	serine/threonine-protein kinase EDR1-like (LOC103969189), transcript variant X1, mRNA	1074	55.58	1085	0	1000		XM_008648027.2	serine/threonine-protein kinase EDR1 (LOC103627717), mRNA	1146	56.21	950	0	840		XM_004235702.3	serine/threonine-protein kinase EDR1 (LOC101263689), transcript variant X1, mRNA	1031	61.23	1024	0	1050		XM_003634237.3	serine/threonine-protein kinase EDR1 (LOC100854850), transcript variant X8, mRNA	1033	65.96	614	0	697		XM_007210346.2	serine/threonine-protein kinase EDR1 (LOC18776750), transcript variant X2, mRNA	1035	63.49	1071	0	1118
	UN000540	XM_020663903.1	uncharacterized LOC18428793 (LOC18428793), transcript variant X1, mRNA	1539	66.83	838	0	1031		XM_009394523.2	uncharacterized LOC103978659 (LOC103978659), transcript variant X1, mRNA	1626	68.35	834	0	1098		XM_020539335.1	uncharacterized LOC100278145 (LOC100278145), transcript variant X6, mRNA	1269	59.48	839	0	882		XM_010327251.2	uncharacterized LOC101252827 (LOC101252827), transcript variant X6, mRNA	1550	67.87	834	0	1056		XM_010663010.2	uncharacterized LOC100265029 (LOC100265029), transcript variant X1, mRNA	1613	70.86	834	0	1147		XM_020556761.1	uncharacterized LOC18784912 (LOC18784912), transcript variant X1, mRNA	1570	67.59	833	0	1050
	UN000542	XM_006827147.3	phosphomethylpyrimidine synthase, chloroplastic (LOC18422194), transcript variant X1, mRNA	642	85.16	647	0	1161		XM_009409282.2	phosphomethylpyrimidine synthase, chloroplastic (LOC103990207), transcript variant X4, mRNA	1261	86.72	640	0	1179		NM_001158333.2	NM_001158333.2 length 643 aa, 1932 bp, from 179..2110 of NM_001158333.2 Zea mays uncharacterized LOC100285440 (cl574_1), mRNA	643	81.41	640	0	1117		NM_001317405.1	NM_001317405.1 length 651 aa, 1956 bp, from 78..2033 of NM_001317405.1 Solanum lycopersicum thiamine biosynthesis protein ThiC (THIC), mRNA	651	83.83	643	0	1153		XM_002280191.4	phosphomethylpyrimidine synthase, chloroplastic (LOC100250096), transcript variant X1, mRNA	656	85.49	641	0	1157		XM_020566434.1	phosphomethylpyrimidine synthase, chloroplastic (LOC18774117), transcript variant X4, mRNA	1234	86.18	644	0	1194
	UN000544	XM_006841234.3	uncharacterized LOC18431102 (LOC18431102), transcript variant X1, mRNA	1468	62.23	654	0	806		XM_009406704.2	uncharacterized LOC103988160 (LOC103988160), transcript variant X1, mRNA	1426	66.41	658	0	841		XM_020550408.1	Erythroid differentiation-related factor 1-like protein (LOC103650944), transcript variant X2, mRNA	1318	61.23	601	0	717		XM_010324457.2	uncharacterized LOC101251689 (LOC101251689), transcript variant X1, mRNA	1433	65.21	572	0	743		XM_010666797.2	uncharacterized LOC100252053 (LOC100252053), transcript variant X1, mRNA	1498	63.87	656	0	801		XM_020570238.1	uncharacterized LOC18766980 (LOC18766980), transcript variant X1, mRNA	1451	65.35	635	0	811
	UN000546	XM_006857272.3	uncharacterized LOC18447171 (LOC18447171), transcript variant X2, mRNA	1363	49.24	1379	0	1057		XM_018826419.1	uncharacterized LOC103985817 (LOC103985817), transcript variant X1, mRNA	1296	49.37	1353	0	1122		XM_008667568.2	uncharacterized LOC103644350 (LOC103644350), mRNA	1236	43.81	1340	0	795		XM_010328466.1	uncharacterized LOC101255735 (LOC101255735), mRNA	1303	45.28	1367	0	923		XM_010651806.2	uncharacterized LOC100251059 (LOC100251059), transcript variant X2, mRNA	1350	56.72	1361	0	1325		XM_020565577.1	uncharacterized LOC18792630 (LOC18792630), transcript variant X1, mRNA	1316	52.28	1360	0	1139
	UN000547	XM_020663748.1	transcription initiation factor TFIID subunit 2 (LOC18422339), transcript variant X5, mRNA	1211	64.04	431	9e-163	517		XM_009393118.2	transcription initiation factor TFIID subunit 2 (LOC103977566), transcript variant X2, mRNA	1354	65.12	410	1e-162	521		XM_020541015.1	transcription initiation factor TFIID subunit 2 (LOC103634102), mRNA	1388	55.34	412	2e-131	437		XM_010320287.2	transcription initiation factor TFIID subunit 2 (LOC101259036), transcript variant X5, mRNA	1320	74.58	236	4e-105	362		XM_010665240.2	transcription initiation factor TFIID subunit 2 (LOC100266355), transcript variant X3, mRNA	1204	67.37	429	3e-171	540		XM_007210372.2	transcription initiation factor TFIID subunit 2 (LOC18776806), mRNA	1470	65.88	296	4e-111	381
	UN000548	XM_006857264.3	DNA excision repair protein CSB (LOC18447163), mRNA	1251	64.37	1263	0	1484		XM_009388305.2	protein CHROMATIN REMODELING 8 (LOC103973674), mRNA	1207	65.51	1238	0	1500		XM_008675604.2	DNA excision repair protein CSB (LOC103649923), mRNA	1218	62.78	1225	0	1459		XM_004247191.3	protein CHROMATIN REMODELING 8 (LOC101252814), mRNA	1213	64.72	1230	0	1513		XM_002272507.4	protein CHROMATIN REMODELING 8 (LOC100253251), mRNA	1227	67.9	1240	0	1574		XM_020569878.1	protein CHROMATIN REMODELING 8 (LOC18768508), mRNA	1218	68.02	1235	0	1592
	UN000549	XM_006828186.3	DNA-directed RNA polymerase III subunit 1 (LOC18423586), transcript variant X1, mRNA	1383	68.15	1394	0	1929		XM_018826641.1	DNA-directed RNA polymerase III subunit 1 (LOC103986088), transcript variant X1, mRNA	1402	69.6	1375	0	1945		XM_008671015.2	DNA-directed RNA polymerase III subunit 1 (LOC103646285), mRNA	1394	65.58	1406	0	1885		XM_004251400.3	DNA-directed RNA polymerase III subunit 1 (LOC101265201), mRNA	1390	65.1	1404	0	1867		XM_002284621.4	DNA-directed RNA polymerase III subunit 1 (LOC100267354), mRNA	1383	69.81	1391	0	2012		XM_020565354.1	DNA-directed RNA polymerase III subunit 1 (LOC18773977), transcript variant X1, mRNA	1425	62.58	1427	0	1818
	UN000550	XM_006843503.3	symplekin (LOC18433413), transcript variant X1, mRNA	1373	57.71	1329	0	1325		XM_009406376.2	uncharacterized LOC103987912 (LOC103987912), transcript variant X1, mRNA	1329	56.65	1338	0	1353		XM_020540899.1	symplekin (LOC103633605), transcript variant X4, mRNA	1027	62.9	655	0	808		XM_004246716.3	uncharacterized LOC101252517 (LOC101252517), mRNA	1322	52.51	1354	0	1226		XM_010654995.2	uncharacterized LOC100262578 (LOC100262578), transcript variant X1, mRNA	1332	60.37	1340	0	1471		XM_007208328.2	uncharacterized LOC18772563 (LOC18772563), mRNA	1332	60.18	1331	0	1433
	UN000553	XM_006855338.3	serine/threonine-protein kinase RUNKEL (LOC18445197), transcript variant X1, mRNA	1359	65.37	1389	0	1764		XM_009407271.2	serine/threonine-protein kinase RUNKEL (LOC103988664), mRNA	1363	65.28	1371	0	1763		XM_008657277.2	serine/threonine-protein kinase RUNKEL (LOC103634684), transcript variant X1, mRNA	1404	61.56	1376	0	1667		XM_010326391.2	serine/threonine-protein kinase RUNKEL (LOC101247640), transcript variant X1, mRNA	1366	65.07	1374	0	1758		XM_002276846.3	serine/threonine-protein kinase RUNKEL (LOC100259712), mRNA	1382	72.78	1374	0	1989		XM_007225398.2	serine/threonine-protein kinase RUNKEL (LOC18790533), mRNA	1434	68.54	1373	0	1830
	UN000554	XM_006850452.3	probable E3 ubiquitin ligase SUD1 (LOC18440303), transcript variant X1, mRNA	1096	75.69	1020	0	1486		XM_009393850.2	probable E3 ubiquitin ligase SUD1 (LOC103978149), mRNA	1115	75.43	1046	0	1538		XM_008661571.2	probable E3 ubiquitin ligase SUD1 (LOC103638745), mRNA	1083	73.83	1043	0	1496		XM_010316920.2	probable E3 ubiquitin ligase SUD1 (LOC101257809), mRNA	1143	78.32	1024	0	1583		XM_010649426.2	probable E3 ubiquitin ligase SUD1 (LOC100262331), transcript variant X2, mRNA	1128	77.94	1047	0	1593		XM_007200263.2	probable E3 ubiquitin ligase SUD1 (LOC18768023), mRNA	1113	78.18	1045	0	1589
	UN000555	XM_011630744.2	protein NLP1-like (LOC18424659), mRNA	672	49.55	662	0	556		XM_018820118.1	protein NLP1-like (LOC103972125), transcript variant X1, mRNA	932	46.96	986	0	758		NM_001350274.1	NM_001350274.1 length 910 aa, 2733 bp, from 399..3131 of NM_001350274.1 Zea mays uncharacterized LOC100278991 (si614029b12), mRNA	910	46.69	816	0	629		XM_010322159.2	protein NLP4 (LOC101260431), transcript variant X1, mRNA	912	44.79	940	0	696		XM_010647578.2	protein NLP2 (LOC100267426), transcript variant X1, mRNA	947	50.16	965	0	809		XM_020563866.1	protein NLP5 (LOC18777244), transcript variant X1, mRNA	913	47.8	979	0	739
	UN000557	XM_006855101.3	topless-related protein 1 (LOC18444945), mRNA	1138	79.39	1014	0	1678		XM_009397640.2	protein TPR3 (LOC103981058), mRNA	1133	80.97	1009	0	1706		NM_001319213.1	NM_001319213.1 length 1128 aa, 3387 bp, from 397..3783 of NM_001319213.1 Zea mays topless-related2 (LOC100276114), mRNA	1128	78.71	1010	0	1646		XM_010320413.2	protein TOPLESS-like (LOC101252765), transcript variant X1, mRNA	1145	79.66	1008	0	1673		XM_002268229.3	protein TOPLESS (LOC100248092), mRNA	1138	80.71	1016	0	1684		XM_007214845.2	protein TOPLESS (LOC18784465), mRNA	1139	81.22	1017	0	1715
	UN000558	XM_006841145.3	ubiquitin carboxyl-terminal hydrolase 17 (LOC18431024), mRNA	1083	55.26	38	5e-06	49.7		XM_009398663.2	ubiquitin carboxyl-terminal hydrolase 18-like (LOC103981903), mRNA	902	56	50	2e-09	61.2		XM_008650805.2	ubiquitin carboxyl-terminal hydrolase 18 (LOC103629692), mRNA	944	58	50	5e-10	62.8		XM_004245255.3	ubiquitin carboxyl-terminal hydrolase 18 (LOC101247350), mRNA	797	56	50	2e-09	60.1		XM_002271804.3	ubiquitin carboxyl-terminal hydrolase 18 (LOC100246913), mRNA	940	64.58	48	1e-12	71.2		XM_007223053.2	ubiquitin carboxyl-terminal hydrolase 18 (LOC18790652), mRNA	701	71.79	39	4e-11	65.9
	UN000559	XM_006854284.3	CLIP-associated protein (LOC18444106), transcript variant X1, mRNA	1463	74.28	1466	0	2033		XM_009385780.2	CLIP-associated protein (LOC103971694), mRNA	1445	71.96	1448	0	1937		XM_008670969.2	CLIP-associated protein (LOC103646242), transcript variant X1, mRNA	1489	66.8	1455	0	1825		XM_004247063.3	CLIP-associated protein-like (LOC101265274), mRNA	1426	71.56	1452	0	1939		XM_010654149.2	CLIP-associated protein (LOC100254930), transcript variant X2, mRNA	1439	76.1	1448	0	2070		XM_007200888.2	CLIP-associated protein (LOC18766494), transcript variant X1, mRNA	1444	76.46	1457	0	2082
	UN000560	XM_006847803.3	uncharacterized LOC18437600 (LOC18437600), transcript variant X3, mRNA	1276	39.27	983	1e-168	526		XM_009399946.2	uncharacterized LOC103982879 (LOC103982879), mRNA	1284	37.3	807	7e-133	431		NM_001177285.1	NM_001177285.1 length 412 aa, 1239 bp, from 77..1315 of NM_001177285.1 Zea mays hypothetical protein (LOC100384849), mRNA	412	39.92	506	1e-97	313		XM_019213005.1	uncharacterized LOC101260214 (LOC101260214), transcript variant X5, mRNA	986	44.4	527	7e-113	370		XM_019226205.1	uncharacterized LOC100266678 (LOC100266678), transcript variant X8, mRNA	1113	41.56	717	2e-139	445		XM_020564831.1	uncharacterized LOC18776032 (LOC18776032), transcript variant X2, mRNA	1150	36.76	933	1e-153	483
	UN000561	XM_006838560.3	MATH domain-containing protein At5g43560 (LOC18429274), mRNA	1136	48.95	1189	0	813		XM_009390752.2	MATH domain-containing protein At5g43560 (LOC103975706), transcript variant X1, mRNA	1143	53.42	1155	0	871		XM_020546525.1	MATH domain-containing protein At5g43560 (LOC103645037), mRNA	1120	45.37	1188	0	713		XM_004233985.3	MATH domain-containing protein At5g43560-like (LOC101260404), transcript variant X1, mRNA	1183	51.07	1163	0	855		XM_019220016.1	MATH domain-containing protein At5g43560 (LOC100247786), transcript variant X6, mRNA	1174	59.78	1156	0	1005		XM_007225364.2	MATH domain-containing protein At5g43560 (LOC18791312), transcript variant X2, mRNA	1141	58.14	1149	0	977
	UN000563	XM_006857244.3	lysine-specific demethylase JMJ18 (LOC18447142), transcript variant X1, mRNA	1290	50.35	1295	0	1081		XM_009421955.2	lysine-specific demethylase JMJ703-like (LOC103999994), transcript variant X1, mRNA	1295	52.85	1334	0	1238		XM_008649924.2	Putative lysine-specific demethylase JMJ16 (LOC100383891), transcript variant X1, mRNA	1260	46.49	1338	0	1083		XM_004236736.3	putative lysine-specific demethylase JMJ16 (LOC101246913), transcript variant X1, mRNA	1191	51.38	1300	0	1187		XM_002266027.4	putative lysine-specific demethylase JMJ16 (LOC100243365), transcript variant X1, mRNA	1272	55.21	1324	0	1333		XM_020565944.1	putative lysine-specific demethylase JMJ16 (LOC18772832), transcript variant X1, mRNA	1227	65.24	702	0	925
	UN000564	XM_020662833.1	protein ALWAYS EARLY 3 (LOC18427125), transcript variant X5, mRNA	1137	52.53	415	7e-85	300		XM_009405935.2	protein ALWAYS EARLY 2-like (LOC103987594), transcript variant X2, mRNA	1195	58.35	413	3e-98	340		XM_008663324.2	Putative MYB DNA-binding domain superfamily protein (LOC100272535), transcript variant X2, mRNA	1147	53.14	414	3e-92	323		XM_010322815.1	protein ALWAYS EARLY 3 (LOC101249204), transcript variant X2, mRNA	1147	47.48	417	1e-82	294		XM_010651453.2	protein ALWAYS EARLY 3 (LOC100261468), mRNA	1205	60.81	421	2e-121	405		XM_020567417.1	protein ALWAYS EARLY 2 (LOC18772125), transcript variant X8, mRNA	1118	52.91	412	7e-92	320
	UN000566	XM_011630790.2	RAB6A-GEF complex partner protein 1 (LOC18424389), mRNA	1143	75.82	1133	0	1711		XM_009389498.2	RAB6A-GEF complex partner protein 1 (LOC103974630), mRNA	1169	76.31	1123	0	1718		XM_020538721.1	guanine nucleotide exchange factor subunit Rich (LOC103627831), transcript variant X2, mRNA	1124	70.61	1116	0	1547		XM_010328267.2	RAB6A-GEF complex partner protein 1-like (LOC101246379), transcript variant X1, mRNA	1125	76.86	1128	0	1716		XM_003633913.3	RAB6A-GEF complex partner protein 1 (LOC100249848), transcript variant X1, mRNA	1126	78.02	1124	0	1766		XM_020557316.1	RAB6A-GEF complex partner protein 1 (LOC18785103), mRNA	1122	78.49	1116	0	1761
	UN000568	XM_006855968.3	guanine nucleotide-binding protein subunit beta-2 (LOC18445842), mRNA	377	86.47	377	0	660		XM_009383013.2	guanine nucleotide-binding protein subunit beta (LOC103969477), mRNA	395	81.79	379	0	617		NM_001111895.1	NM_001111895.1 length 380 aa, 1143 bp, from 196..1338 of NM_001111895.1 Zea mays GTP binding protein 2 (gbp2), mRNA	380	79.37	378	0	608		XM_004230859.3	guanine nucleotide-binding protein subunit beta (LOC101252441), mRNA	377	81.96	377	0	625		XM_003631599.3	guanine nucleotide-binding protein subunit beta-2 (LOC100853292), transcript variant X1, mRNA	383	86.47	377	0	654		XM_007201001.2	guanine nucleotide-binding protein subunit beta-2 (LOC18767499), mRNA	377	84.35	377	0	646
	UN000569	XM_020671968.1	dentin sialophosphoprotein (LOC18441945), transcript variant X3, mRNA	958	49.38	81	9e-25	95.9		XM_018828187.1	dentin sialophosphoprotein-like (LOC103989308), transcript variant X4, mRNA	1220	58.33	84	1e-28	107		XM_008665111.2	uncharacterized LOC103641776 (LOC103641776), transcript variant X1, mRNA	1522	39.02	82	1e-14	67.4		XM_004239446.3	serine-rich adhesin for platelets-like (LOC101251779), transcript variant X1, mRNA	1212	58.54	82	2e-28	106		XM_010652641.2	uncharacterized LOC104879533 (LOC104879533), mRNA	1277	67.86	84	3e-35	126		XM_020555693.1	uncharacterized LOC109946820 (LOC109946820), transcript variant X3, mRNA	1070	56.1	82	2e-26	100
	UN000570	XM_020671909.1	putative leucine-rich repeat-containing protein DDB_G0290503 (LOC18423052), transcript variant X6, mRNA	1250	54.32	81	6e-15	80.1		XM_009384105.2	girdin-like (LOC103970355), mRNA	1028	56.47	85	3e-16	84.7		XM_008666552.2	interaptin (LOC103643389), mRNA	1007	57.58	66	4e-13	74.7		XM_004244559.3	early endosome antigen 1 (LOC101251402), mRNA	1064	61.04	77	2e-16	84.7		XM_010664465.2	myosin-3 (LOC100248827), transcript variant X1, mRNA	1051	60.82	97	8e-23	106		XM_020564313.1	myosin-11 (LOC18777887), mRNA	1097	58.54	82	9e-17	86.3
	UN000572	XM_020675525.1	uncharacterized LOC18447396 (LOC18447396), transcript variant X1, mRNA	1323	48.15	108	4e-24	107		XM_018829276.1	uncharacterized LOC103992367 (LOC103992367), transcript variant X4, mRNA	1300	49.51	103	1e-21	100		XM_008671062.2	hapless 8 (LOC103646329), mRNA	1238	50	102	3e-20	95.9		XM_004243951.2	uncharacterized LOC101263134 (LOC101263134), transcript variant X1, mRNA	1415	60.47	43	4e-08	56.6		XM_010646390.1	uncharacterized LOC100263414 (LOC100263414), transcript variant X3, mRNA	1474	51.72	87	2e-14	77.4		XM_007208079.2	uncharacterized LOC18774051 (LOC18774051), transcript variant X1, mRNA	1460	43.12	109	3e-17	86.3
	UN000573	XM_020663864.1	uncharacterized LOC18428679 (LOC18428679), transcript variant X2, mRNA	1399	67.78	1378	0	1846		XM_009415798.2	uncharacterized LOC103995252 (LOC103995252), mRNA	1390	69.62	1376	0	1903		NM_001346761.1	NM_001346761.1 length 1407 aa, 4224 bp, from 21..4244 of NM_001346761.1 Zea mays uncharacterized LOC100280420 (LOC100280420), transcript variant 1, mRNA	1407	65.58	1377	0	1810		XM_004235696.3	uncharacterized LOC101261901 (LOC101261901), mRNA	1388	71.61	1381	0	1955		XM_010665393.2	uncharacterized LOC100262718 (LOC100262718), transcript variant X4, mRNA	1384	74.21	1384	0	2007		XM_020563411.1	uncharacterized LOC18776193 (LOC18776193), mRNA	1373	73.77	1384	0	2021
	UN000574	XM_006826365.3	nuclear pore complex protein NUP1 (LOC18421616), transcript variant X1, mRNA	1361	34.66	753	2e-81	281		XM_009391161.2	nuclear pore complex protein NUP1-like (LOC103975998), mRNA	1363	36.73	735	5e-86	295		XM_008667343.2	nuclear pore complex protein NUP1-like (LOC103644146), mRNA	1336	31.08	489	2e-34	141		XM_010314201.2	nuclear pore complex protein NUP1 (LOC101267283), mRNA	1318	38.33	600	7e-77	269		XM_002264126.4	nuclear pore complex protein NUP1 (LOC100261025), mRNA	1307	37.28	727	4e-96	323		XM_020556153.1	nuclear pore complex protein NUP1 (LOC18779369), mRNA	1308	38.04	723	8e-83	285
	UN000575	XM_020664666.1	uncharacterized LOC18421421 (LOC18421421), transcript variant X1, mRNA	1427	58.09	470	2e-165	513		XM_018826607.1	uncharacterized LOC103983787 (LOC103983787), transcript variant X5, mRNA	1246	50.33	749	0	632		XM_008646287.2	uncharacterized LOC103625887 (LOC103625887), transcript variant X1, mRNA	1376	48.12	584	4e-172	530		XM_004247476.3	uncharacterized LOC101253531 (LOC101253531), transcript variant X1, mRNA	1366	51.36	664	0	632		XM_010651596.2	uncharacterized LOC100247619 (LOC100247619), transcript variant X4, mRNA	1404	54.8	750	0	712		XM_007224423.2	uncharacterized LOC18791629 (LOC18791629), transcript variant X1, mRNA	1349	52.37	781	0	706
	UN000576	XM_006827652.3	K(+) efflux antiporter 2, chloroplastic (LOC18423071), mRNA	1295	74.57	1093	0	1354		XM_009396255.2	K(+) efflux antiporter 2, chloroplastic-like (LOC103979973), transcript variant X1, mRNA	1202	74.19	1147	0	1394		XM_020544912.1	uncharacterized LOC100217150 (LOC100217150), transcript variant X1, mRNA	1174	69.22	1147	0	1290		XM_004229832.3	K(+) efflux antiporter 2, chloroplastic (LOC101246664), mRNA	1208	71.33	1165	0	1369		XM_002269316.3	K(+) efflux antiporter 2, chloroplastic (LOC100244810), transcript variant X1, mRNA	1207	70.7	1256	0	1458		XM_007220235.2	K(+) efflux antiporter 2, chloroplastic (LOC18784792), mRNA	1223	70.29	1222	0	1437
	UN000577	XM_006827016.3	probable inactive receptor kinase At5g10020 (LOC18422088), transcript variant X1, mRNA	1060	46.52	1049	0	776		XM_009381908.2	probable inactive receptor kinase At5g10020 (LOC103968630), transcript variant X1, mRNA	1056	48.66	1048	0	862		XM_008661975.2	probable inactive receptor kinase (LOC103639191), mRNA	1061	52.08	1035	0	1000		XM_010327726.2	probable LRR receptor-like serine/threonine-protein kinase At4g20940 (LOC101263744), mRNA	977	53.31	1026	0	983		XM_002270248.4	probable inactive receptor kinase At5g10020 (LOC100242827), mRNA	1020	57.96	1037	0	1092		XM_007206379.2	probable inactive receptor kinase At5g10020 (LOC18774505), mRNA	1014	57.42	1038	0	1070
	UN000578	XM_020662216.1	ATP-dependent DNA helicase Q-like 4A (LOC18425823), transcript variant X1, mRNA	1264	60.86	1183	0	1347		XM_009406591.2	ATP-dependent DNA helicase Q-like 4A (LOC103988081), transcript variant X1, mRNA	1232	64.39	1171	0	1456		XM_008683348.2	ATP-dependent DNA helicase Q-like 4A (LOC100274706), transcript variant X1, mRNA	1234	52.97	1180	0	1139		XM_004231289.3	ATP-dependent DNA helicase Q-like 4A (LOC101260976), mRNA	1180	59.6	1188	0	1316		XM_019223771.1	ATP-dependent DNA helicase Q-like 4A (LOC100245652), transcript variant X1, mRNA	1262	65.05	1173	0	1442		XM_020563269.1	ATP-dependent DNA helicase Q-like 4A (LOC18780604), transcript variant X1, mRNA	1223	62.04	1159	0	1377
	UN000579	XM_011626888.2	zinc finger CCCH domain-containing protein 19 (LOC18439028), mRNA	1359	53.66	807	0	741		XM_009397097.2	zinc finger CCCH domain-containing protein 19-like (LOC103980643), mRNA	2149	50.37	810	0	746		XM_008674002.2	Zinc finger CCCH domain-containing protein 19 (LOC100194316), transcript variant X1, mRNA	1802	46.66	808	0	673		XM_010314914.2	zinc finger CCCH domain-containing protein 19 (LOC101249239), transcript variant X1, mRNA	1718	49.74	772	0	707		XM_010650776.2	zinc finger CCCH domain-containing protein 44 (LOC100252322), mRNA	1522	52.19	822	0	775		XM_020553881.1	zinc finger CCCH domain-containing protein 19 (LOC18768264), mRNA	1597	55.74	775	0	758
	UN000580	XM_006843787.3	respiratory burst oxidase homolog protein E (LOC18433706), mRNA	924	58.49	930	0	1103		XM_009408507.2	respiratory burst oxidase homolog protein A-like (LOC103989616), mRNA	941	75.94	956	0	1465		NM_001112548.1	NM_001112548.1 length 948 aa, 2847 bp, from 64..2910 of NM_001112548.1 Zea mays respiratory burst oxidase-like protein C (rbohC), mRNA	948	72.3	946	0	1380		XM_019215027.1	NADPH oxidase (RBOH1), transcript variant X1, mRNA	986	77.4	969	0	1465		XM_002277493.4	respiratory burst oxidase homolog protein A (LOC100262101), mRNA	943	80.1	960	0	1486		XM_007210336.2	respiratory burst oxidase homolog protein A (LOC18775913), mRNA	964	79.61	966	0	1511
	UN000584	XM_020661825.1	ABC transporter G family member 32 (LOC18424976), transcript variant X2, mRNA	1426	78.36	1423	0	2207		XM_009409360.2	ABC transporter G family member 31 (LOC103990282), transcript variant X1, mRNA	1420	78.5	1423	0	2273		NM_001321723.1	NM_001321723.1 length 1437 aa, 4314 bp, from 31..4344 of NM_001321723.1 Zea mays glossy13 (LOC100384030), mRNA	1437	74.58	1432	0	2172		XM_010322765.2	ABC transporter G family member 32 (LOC101244486), transcript variant X1, mRNA	1428	75.35	1424	0	2175		XM_002284849.3	ABC transporter G family member 32-like (LOC100264482), mRNA	1421	79.71	1424	0	2269		XM_007204241.2	ABC transporter G family member 32 (LOC18771402), mRNA	1424	78.72	1424	0	2227
	UN000585	XM_006858452.3	nonsense transcripts 1 homolog (LOC18448386), mRNA	1252	87.22	1252	0	2153		XM_009400300.2	regulator of nonsense transcripts 1 homolog (LOC103983130), transcript variant X2, mRNA	1268	85.96	1246	0	2112		XM_008670178.2	uncharacterized LOC100383288 (pco090939), transcript variant X2, mRNA	1273	81.81	1259	0	2046		XM_004244502.3	regulator of nonsense transcripts 1 homolog (LOC101258879), transcript variant X1, mRNA	1309	84.41	1244	0	2098		XM_002279268.4	regulator of nonsense transcripts 1 homolog (LOC100264343), transcript variant X2, mRNA	1267	89.96	1235	0	2197		XM_007210366.2	regulator of nonsense transcripts 1 homolog (LOC18777232), transcript variant X1, mRNA	1297	87.69	1243	0	2149
	UN000586	XM_020670199.1	uncharacterized LOC18438955 (LOC18438955), transcript variant X1, mRNA	1275	81.53	1213	0	1860		XM_009407302.2	uncharacterized LOC103988692 (LOC103988692), mRNA	1282	85.22	1211	0	1980		XM_020542492.1	uncharacterized LOC103637390 (LOC103637390), mRNA	1430	81.75	1200	0	1902		XM_004230334.3	uncharacterized LOC101246184 (LOC101246184), transcript variant X1, mRNA	1409	80.82	1199	0	1834		XM_002263708.3	uncharacterized LOC100248418 (LOC100248418), mRNA	1296	87.51	1209	0	1999		XM_007200274.2	uncharacterized LOC18767094 (LOC18767094), mRNA	1408	83.79	1209	0	1967
	UN000587	XM_020669317.1	protein HASTY 1 (LOC18437700), transcript variant X1, mRNA	1224	64.58	1197	0	1339		XM_009419356.2	protein HASTY 1 (LOC103997995), mRNA	1204	69.04	1208	0	1495		XM_020542679.1	protein HASTY 1 (LOC103635172), transcript variant X1, mRNA	1199	62.34	1187	0	1300		XM_004230097.3	protein HASTY 1 (LOC101250741), mRNA	1230	67.17	1191	0	1436		XM_002272891.3	protein HASTY 1 (LOC100258918), transcript variant X1, mRNA	1206	72.37	1209	0	1574		XM_007208069.2	protein HASTY 1 (LOC18774411), mRNA	1202	69.71	1192	0	1505
	UN000591	XM_006850734.3	RNA polymerase II transcription subunit 33A (LOC18440596), mRNA	1327	58.33	96	4e-18	90.9		XM_009386678.2	mediator of RNA polymerase II transcription subunit 33A-like (LOC103972363), mRNA	1330	67.02	94	2e-24	112		NM_001196847.1	NM_001196847.1 length 190 aa, 573 bp, from 72..644 of NM_001196847.1 Zea mays uncharacterized LOC100502369 (LOC100502369), mRNA	190	61.05	95	1e-22	97.8		XM_010324435.2	mediator of RNA polymerase II transcription subunit 33A (LOC101260265), mRNA	1342	49.48	97	4e-16	84.7		XM_010654797.2	mediator of RNA polymerase II transcription subunit 33A (LOC100258764), transcript variant X3, mRNA	1310	71.21	66	1e-22	106		XM_007206281.2	mediator of RNA polymerase II transcription subunit 33A (LOC18772822), mRNA	1326	75	72	1e-26	119
	UN000592	XM_006854041.3	pentatricopeptide repeat-containing protein At5g01110 (LOC18443860), mRNA	728	57.08	692	0	827		XM_018821125.1	pentatricopeptide repeat-containing protein At5g01110-like (LOC103972771), transcript variant X1, mRNA	717	61.53	616	0	797		XM_008653166.2	pentatricopeptide repeat-containing protein (LOC103631761), transcript variant X2, mRNA	650	51.41	601	0	644		XM_004237533.3	pentatricopeptide repeat-containing protein At5g01110 (LOC101246240), mRNA	738	54.05	703	0	785		XM_010653209.2	pentatricopeptide repeat-containing protein At5g01110 (LOC100244765), transcript variant X1, mRNA	753	62.23	683	0	895		XM_007219056.2	pentatricopeptide repeat-containing protein At5g01110 (LOC18787523), transcript variant X2, mRNA	780	60.83	674	0	876
	UN000594	XM_020671496.1	protein HUA2-LIKE 2 (LOC18440587), transcript variant X1, mRNA	1471	61.8	267	5e-92	308		XM_009422713.2	protein HUA2-LIKE 3-like (LOC104000628), transcript variant X1, mRNA	1399	45.57	531	2e-108	354		XM_008661916.2	protein HUA2-LIKE 2 (LOC103639119), transcript variant X4, mRNA	1309	55.71	280	5e-83	283		XM_019215572.1	protein HUA2-LIKE 2 (LOC101258186), mRNA	1681	56.79	280	1e-86	294		XM_002271830.4	protein HUA2-LIKE 2 (LOC100261323), transcript variant X1, mRNA	1479	43.26	608	1e-111	364		XM_020570154.1	probable glutathione peroxidase 5 (LOC18766597), transcript variant X1, mRNA	1432	42.05	566	1e-90	304
	UN000597	XM_020663417.1	protein STICHEL (LOC18427827), mRNA	1236	47.68	1269	0	874		XM_018819835.1	protein STICHEL-like (LOC103968414), mRNA	1180	61.92	793	0	849		XM_008676750.2	protein STICHEL (LOC103651146), transcript variant X6, mRNA	1174	58.74	795	0	826		XM_010315882.2	protein STICHEL (LOC101254741), mRNA	1273	52.46	1319	0	1030		XM_002268923.4	protein STICHEL (LOC100242129), mRNA	1282	52.71	1309	0	994		XM_020554244.1	protein STICHEL (LOC18790295), transcript variant X1, mRNA	1277	52.26	1326	0	968
	UN000598	XM_020664786.1	uncharacterized LOC18430337 (LOC18430337), transcript variant X2, mRNA	1352	44.59	1386	0	902		XM_009389306.2	uncharacterized LOC103974449 (LOC103974449), transcript variant X3, mRNA	1258	41.33	1355	0	801		XM_008676336.2	Serine/arginine repetitive matrix protein 2 isoform 4 (LOC103650763), transcript variant X3, mRNA	1254	38.3	1350	0	729		XM_010325735.2	uncharacterized LOC101262536 (LOC101262536), transcript variant X1, mRNA	1276	44.46	1327	0	812		XM_019223069.1	uncharacterized LOC100257683 (LOC100257683), transcript variant X2, mRNA	1317	52.16	1340	0	1054		XM_020568198.1	uncharacterized LOC18769101 (LOC18769101), transcript variant X3, mRNA	1295	51.23	1337	0	1097
	UN000599	XM_020668331.1	uncharacterized LOC18436009 (LOC18436009), mRNA	1226	58.66	1207	0	1170		XM_009414330.2	uncharacterized LOC103994061 (LOC103994061), transcript variant X1, mRNA	1224	60.89	1194	0	1232		XM_008676250.2	hypothetical protein (LOC103650684), transcript variant X5, mRNA	1219	58.22	1199	0	1145		XM_010323771.2	uncharacterized LOC101259445 (LOC101259445), transcript variant X1, mRNA	1229	60.71	1191	0	1172		XM_002279165.4	uncharacterized LOC100263302 (LOC100263302), transcript variant X1, mRNA	1205	63.91	1208	0	1328		XM_007220255.2	uncharacterized LOC18787560 (LOC18787560), transcript variant X4, mRNA	1256	64.16	1197	0	1335
	UN000600	XM_020673955.1	uncharacterized LOC18444914 (LOC18444914), transcript variant X5, mRNA	1368	49.89	1393	0	1070		XM_009406092.2	uncharacterized LOC103987711 (LOC103987711), transcript variant X4, mRNA	1330	48.4	1378	0	995		XM_008650455.2	uncharacterized LOC103629278 (LOC103629278), mRNA	1211	38.81	1005	2e-163	523		XM_004249916.3	uncharacterized LOC101267370 (LOC101267370), transcript variant X1, mRNA	1300	43.44	1372	0	798		XM_010660558.2	uncharacterized LOC100252823 (LOC100252823), transcript variant X1, mRNA	1351	50.84	1373	0	1053		XM_020557018.1	uncharacterized LOC18779968 (LOC18779968), transcript variant X1, mRNA	1309	44.62	1358	0	893
	UN000601	XM_020666788.1	telomerase reverse transcriptase (LOC18433477), transcript variant X3, mRNA	1224	43.38	975	0	703		XM_018821135.1	telomerase reverse transcriptase (LOC103972865), transcript variant X5, mRNA	1241	44.89	998	0	739		XM_020543860.1	telomerase reverse transcriptase catalytic subunit (TERT), transcript variant X1, mRNA	1166	51.97	279	1e-77	276		XM_010326137.2	telomerase reverse transcriptase (LOC101244526), transcript variant X2, mRNA	1132	41.56	960	0	680		XM_019224507.1	telomerase reverse transcriptase (LOC104881309), transcript variant X3, mRNA	1101	48.22	956	0	787		XM_020558418.1	telomerase reverse transcriptase (LOC18785373), transcript variant X4, mRNA	1276	46.71	957	0	751
	UN000602	XM_006853931.3	uncharacterized LOC18443749 (LOC18443749), transcript variant X2, mRNA	1178	58.09	303	1e-101	343		XM_009403699.2	uncharacterized LOC103985842 (LOC103985842), mRNA	1181	53.59	390	4e-103	348		NM_001301532.1	NM_001301532.1 length 516 aa, 1551 bp, from 53..1603 of NM_001301532.1 Zea mays IST1-like protein (LOC103641204), mRNA	516	64.1	195	1e-81	274		XM_004243100.3	uncharacterized LOC101265657 (LOC101265657), mRNA	1085	56.77	303	2e-104	350		XM_002279856.4	uncharacterized LOC100256064 (LOC100256064), transcript variant X1, mRNA	1179	57.74	381	1e-110	369		XM_020568744.1	uncharacterized LOC18770926 (LOC18770926), mRNA	1449	59.87	314	3e-108	366
	UN000605	XM_006846225.3	pumilio homolog 2 (LOC18436203), mRNA	1019	63.74	1070	0	1193		XM_009382802.2	pumilio homolog 2 (LOC103969306), transcript variant X1, mRNA	1078	60.94	1019	0	1136		XM_020538747.1	pumilio homolog 1 (LOC103627898), mRNA	1029	49.66	1029	0	868		XM_004241168.3	pumilio homolog 2-like (LOC101245368), mRNA	993	59.56	1051	0	1120		XM_010660238.2	pumilio homolog 2 (LOC100265064), mRNA	1071	66.12	1039	0	1284		XM_007208058.2	pumilio homolog 1 (LOC18773001), mRNA	1062	65.15	1076	0	1264
	UN000606	XM_006838440.3	nucleolin (LOC18429148), mRNA	805	63.79	580	0	618		XM_009390826.2	nucleolin (LOC103975755), transcript variant X1, mRNA	786	59.79	562	0	554		XM_020548002.1	RNA recognition water-stress protein 1 (rws1), transcript variant X1, mRNA	794	54.41	590	8e-179	526		XM_010326852.2	nucleolin-like (LOC101251325), transcript variant X1, mRNA	784	59.51	536	0	551		XM_002270066.3	RNA-binding motif protein, X chromosome (LOC100266805), transcript variant X4, mRNA	730	65.1	596	0	695		XM_007220561.2	uncharacterized RNA-binding protein C660.15 (LOC18786415), mRNA	809	60.14	577	0	556
	UN000607	XM_011624826.2	RNA polymerase II transcription subunit 15a (LOC18433749), transcript variant X2, mRNA	1427	44.05	958	0	649		XM_009384688.2	uncharacterized LOC103970773 (LOC103970773), mRNA	1279	48.33	1351	0	882		XM_008681534.2	uncharacterized LOC103654689 (LOC103654689), mRNA	1317	40.29	1221	0	595		XM_004241800.3	mediator of RNA polymerase II transcription subunit 15a (LOC101257868), mRNA	1352	47.35	1037	0	742		XM_002272281.4	uncharacterized LOC100265246 (LOC100265246), mRNA	1359	48.01	1031	0	780		XM_020559233.1	probable serine/threonine-protein kinase yakA (LOC18782261), transcript variant X1, mRNA	1366	52.33	965	0	857
	UN000608	XM_020671193.1	auxin response factor 19 (LOC18440755), mRNA	1201	83.54	474	0	759		XM_009392190.2	auxin response factor 19 (LOC103976858), transcript variant X1, mRNA	1137	82.3	531	0	860		XM_008646822.2	auxin response factor 19 (LOC103626415), transcript variant X1, mRNA	1163	76.88	532	0	765		NM_001247811.2	NM_001247811.2 length 1112 aa, 3339 bp, from 115..3453 of NM_001247811.2 Solanum lycopersicum auxin response factor 19 (ARF19), mRNA	1112	77.9	534	0	773		XM_010658398.2	auxin response factor 19 (LOC100263801), mRNA	1125	82.12	520	0	808		XM_007225363.2	auxin response factor 19 (LOC18788345), mRNA	1139	79.17	533	0	783
	UN000609	XM_006842150.3	systemin receptor SR160 (LOC18432040), mRNA	1226	62.02	1148	0	1202		XM_009397526.2	systemin receptor SR160-like (LOC103980973), mRNA	1163	62.67	1077	0	1196		NM_001322851.1	NM_001322851.1 length 1122 aa, 3369 bp, from 141..3509 of NM_001322851.1 Zea mays brassinosteroid LRR receptor kinase (LOC103636232), mRNA	1122	57.79	1085	0	1103		NM_001309251.1	NM_001309251.1 length 1207 aa, 3624 bp, from 1..3624 of NM_001309251.1 Solanum lycopersicum brassinosteroid LRR receptor kinase (CURL3), mRNA	1207	62.01	1145	0	1233		XM_002278899.4	systemin receptor SR160 (LOC100252647), mRNA	1191	65.81	1161	0	1344		XM_007208320.2	systemin receptor SR160 (LOC18772488), mRNA	1203	63.16	1159	0	1254
	UN000610	XM_011626143.2	probable ubiquitin-conjugating enzyme E2 24 (LOC18437080), transcript variant X4, mRNA	967	51.91	940	0	862		XM_009418217.2	probable ubiquitin-conjugating enzyme E2 24 (LOC103997076), transcript variant X4, mRNA	915	54.24	944	0	913		XM_008650020.2	putative ubiquitin-conjugating enzyme E2 24 (LOC100502171), transcript variant X1, mRNA	871	50.11	928	0	753		XM_010318450.2	probable ubiquitin-conjugating enzyme E2 24 (LOC101250073), transcript variant X1, mRNA	925	48.93	932	0	802		XM_002267454.4	probable ubiquitin-conjugating enzyme E2 24 (LOC100266813), transcript variant X1, mRNA	944	55.11	940	0	929		XM_007213608.2	probable ubiquitin-conjugating enzyme E2 24 (LOC18780418), mRNA	928	53.41	938	0	863
	UN000612	XM_020675106.1	protein TORNADO 1 (LOC18446628), transcript variant X1, mRNA	1376	60.52	1398	0	1665		XM_009409333.2	protein TORNADO 1 (LOC103990256), mRNA	1379	63.49	1383	0	1767		XM_020548580.1	Protein TORNADO 1 (pco115518c), transcript variant X1, mRNA	1401	53.83	1369	0	1430		NM_001302910.1	NM_001302910.1 length 1456 aa, 4371 bp, from 157..4527 of NM_001302910.1 Solanum lycopersicum protein TORNADO 1 (TRN1), mRNA	1456	69.89	1385	0	2001		XM_002276375.3	protein TORNADO 1 (LOC100246876), mRNA	1386	75.27	1387	0	2148		XM_020563092.1	protein TORNADO 1 (LOC18780041), mRNA	1382	72.42	1385	0	2092
	UN000615	XM_006837891.3	uncharacterized LOC18428573 (LOC18428573), transcript variant X1, mRNA	1250	47.22	1224	0	900		XM_009397898.2	uncharacterized LOC103981244 (LOC103981244), mRNA	1237	50.82	1161	0	974		XM_008680915.2	DUF2146 family protein (LOC103654098), transcript variant X1, mRNA	1164	45.56	1161	0	828		XM_010324111.2	uncharacterized LOC101268477 (LOC101268477), transcript variant X1, mRNA	1242	49.37	1183	0	972		XM_010653462.2	uncharacterized LOC100267175 (LOC100267175), transcript variant X1, mRNA	1236	57.75	1162	0	1154		XM_020566772.1	uncharacterized LOC18773205 (LOC18773205), transcript variant X1, mRNA	1258	54.16	1167	0	1072
	UN000618	XM_011624324.2	uncharacterized LOC18432163 (LOC18432163), transcript variant X1, mRNA	1031	33.09	1079	4e-121	395		XM_009405699.2	uncharacterized LOC103987405 (LOC103987405), mRNA	946	33.17	1028	3e-95	323		XM_008675532.2	hypothetical protein (LOC103649829), mRNA	853	30.79	393	4e-34	142		XM_004232300.3	uncharacterized LOC101265984 (LOC101265984), mRNA	962	34.52	591	1e-60	224		XM_002280534.4	uncharacterized LOC100263470 (LOC100263470), mRNA	1004	39.52	1040	4e-163	506		XM_007217008.2	uncharacterized LOC18783147 (LOC18783147), mRNA	981	37.83	1023	4e-150	471
	UN000619	XM_006827029.3	E3 ubiquitin-protein ligase RKP (LOC18422358), mRNA	1294	62.88	1293	0	1578		XM_009388026.2	E3 ubiquitin-protein ligase RKP (LOC103973458), transcript variant X1, mRNA	1272	62.46	1276	0	1500		XM_008653158.2	uncharacterized LOC100280438 (LOC100280438), transcript variant X1, mRNA	1272	58.18	1277	0	1457		XM_010321477.2	E3 ubiquitin-protein ligase RKP (LOC101249347), transcript variant X3, mRNA	1297	62.73	1280	0	1578		XM_002276242.4	E3 ubiquitin-protein ligase RKP (LOC100250977), mRNA	1310	68.6	1277	0	1738		XM_007208072.2	E3 ubiquitin-protein ligase RKP (LOC18772731), transcript variant X1, mRNA	1284	69.31	1274	0	1682
	UN000621	XM_020667923.1	uncharacterized LOC18435345 (LOC18435345), transcript variant X1, mRNA	1686	46.69	302	3e-62	224		XM_009395820.2	uncharacterized LOC103979654 (LOC103979654), transcript variant X1, mRNA	1381	36.42	637	1e-83	287		XM_020540796.1	uncharacterized LOC103632633 (LOC103632633), transcript variant X1, mRNA	1217	35.26	624	3e-68	242		XM_010324211.2	uncharacterized LOC101249932 (LOC101249932), mRNA	1420	39.72	647	1e-81	281		XM_010657091.2	uncharacterized LOC100247051 (LOC100247051), transcript variant X1, mRNA	1517	44.07	674	9e-120	389		XM_020561474.1	uncharacterized LOC18778249 (LOC18778249), mRNA	1448	41.05	648	2e-98	329
	UN000623	XM_006854469.3	trafficking protein particle complex subunit 8 (LOC18444293), transcript variant X1, mRNA	1322	57.91	1309	0	1431		XM_009399137.2	trafficking protein particle complex subunit 8 (LOC103982260), transcript variant X1, mRNA	1285	59.47	1293	0	1500		XM_008667340.2	trafficking protein particle complex subunit 8 (LOC103644142), mRNA	1274	54.21	1284	0	1351		XM_004228546.3	trafficking protein particle complex subunit 8 (LOC101264146), mRNA	1268	56.38	1286	0	1387		XM_002263605.4	trafficking protein particle complex subunit 8 (LOC100248747), mRNA	1289	62.84	1289	0	1571		XM_020567940.1	trafficking protein particle complex subunit 8 (LOC18769311), transcript variant X1, mRNA	1288	59.37	1292	0	1474
	UN000624	XM_006842430.3	probable LRR receptor-like serine/threonine-protein kinase IRK (LOC18432321), mRNA	997	59.43	954	0	970		XM_009408595.2	probable LRR receptor-like serine/threonine-protein kinase IRK (LOC103989671), transcript variant X1, mRNA	982	71.02	949	0	1161		XM_008683135.2	putative LRR receptor-like serine/threonine-protein kinase IRK (LOC100304322), transcript variant X1, mRNA	972	63.92	945	0	1031		XM_004241036.2	probable LRR receptor-like serine/threonine-protein kinase IRK (LOC101247434), mRNA	971	68.28	949	0	1152		XM_002275239.3	probable LRR receptor-like serine/threonine-protein kinase IRK (LOC100257029), mRNA	974	76.08	945	0	1263		XM_007220216.2	probable LRR receptor-like serine/threonine-protein kinase IRK (LOC18784643), mRNA	975	71.85	945	0	1192
	UN000626	XM_020665188.1	TMV resistance protein N-like (LOC18430837), transcript variant X3, mRNA	1365	43.61	1337	0	846		XM_009403061.2	plant intracellular Ras-group-related LRR protein 4-like (LOC103985388), transcript variant X1, mRNA	551	35.9	273	6e-16	83.6		XM_008654346.2	putative disease resistance protein RGA1 (LOC103632580), transcript variant X3, mRNA	1009	24.4	713	1e-18	93.2		XM_010322337.2	TMV resistance protein N-like (LOC101253784), mRNA	1424	56.53	1385	0	1336		XM_010654467.2	disease resistance protein TAO1 (LOC100263854), mRNA	1451	62.11	1383	0	1467		XM_007227295.2	TMV resistance protein N (LOC18788231), transcript variant X1, mRNA	1419	57.66	1391	0	1359
	UN000627	XM_006842284.3	zinc finger protein BRUTUS (LOC18432174), mRNA	1218	46.84	681	0	600		XM_018823510.1	uncharacterized LOC103992001 (LOC103992001), transcript variant X2, mRNA	1165	35.53	895	2e-149	482		XM_008676946.2	zinc finger protein-related (LOC103651324), transcript variant X5, mRNA	1080	35.78	911	5e-163	516		XM_010320660.2	uncharacterized LOC101268855 (LOC101268855), mRNA	1258	47.41	1293	0	1143		XM_002266536.4	zinc finger protein BRUTUS-like At1g18910 (LOC100267228), transcript variant X1, mRNA	1288	56.38	1286	0	1413		XM_020564093.1	zinc finger protein BRUTUS-like At1g18910 (LOC18776709), transcript variant X1, mRNA	1260	50.78	1278	0	1233
	UN000628	XM_011624827.2	auxin response factor 19 (LOC18433752), transcript variant X1, mRNA	992	77.71	480	0	676		XM_009419729.2	auxin response factor 16 (LOC103998292), transcript variant X2, mRNA	1041	77.48	484	0	702		XM_008660945.2	auxin response factor 16 (LOC103637942), transcript variant X1, mRNA	1060	78.97	466	0	692		XM_004243644.3	auxin response factor 7 (LOC100191131), transcript variant X1, mRNA	1137	79.58	475	0	696		XM_010657792.2	auxin response factor 7 (LOC100257618), transcript variant X1, mRNA	1160	82.81	477	0	720		XM_020567694.1	auxin response factor 7 (LOC18770792), transcript variant X1, mRNA	1168	85.32	477	0	744
	UN000629	XM_006857555.3	disease resistance protein RPM1 (LOC18447458), mRNA	911	30.31	904	5e-99	333		XM_009383096.2	disease resistance protein RGA2-like (LOC103969538), mRNA	1120	40.97	1091	0	726		XM_020539604.1	putative disease resistance protein RGA3 (LOC103631582), mRNA	1143	38.43	1080	0	682		XM_004245875.3	putative disease resistance protein RGA4 (LOC101251707), mRNA	1003	37.98	1048	0	605		XM_010660873.2	putative disease resistance protein RGA3 (LOC100853082), mRNA	1058	45.71	1048	0	820		XM_020565468.1	putative disease resistance protein At3g14460 (LOC18773320), transcript variant X1, mRNA	1132	40.64	1026	0	694
	UN000631	XM_020663885.1	probable serine/threonine protein kinase IREH1 (LOC18428675), transcript variant X1, mRNA	1357	74.85	839	0	1211		XM_009410721.2	probable serine/threonine protein kinase IREH1 (LOC103991313), mRNA	1363	72.19	827	0	1149		XM_008667063.2	putative serine/threonine protein kinase IREH1 (LOC103643892), mRNA	1303	68.34	837	0	1100		XM_004241592.3	probable serine/threonine protein kinase IREH1 (LOC101246150), mRNA	1279	72.07	852	0	1190		XM_019226525.1	probable serine/threonine protein kinase IREH1 (LOC100259538), transcript variant X4, mRNA	1297	77.59	830	0	1236		XM_007211117.2	probable serine/threonine protein kinase IREH1 (LOC18776148), transcript variant X1, mRNA	1370	74.59	850	0	1223
	UN000632	XM_006847803.3	uncharacterized LOC18437600 (LOC18437600), transcript variant X3, mRNA	1276	66.12	183	3e-65	236		XM_009389128.2	uncharacterized LOC103974329 (LOC103974329), transcript variant X1, mRNA	1232	64.29	182	1e-66	241		NM_001177285.1	NM_001177285.1 length 412 aa, 1239 bp, from 77..1315 of NM_001177285.1 Zea mays hypothetical protein (LOC100384849), mRNA	412	55.43	184	6e-55	195		XM_019213004.1	uncharacterized LOC101260214 (LOC101260214), transcript variant X1, mRNA	1087	61.08	185	5e-61	223		XM_010663741.2	uncharacterized LOC100266678 (LOC100266678), transcript variant X6, mRNA	1146	58.91	202	1e-63	231		XM_020564831.1	uncharacterized LOC18776032 (LOC18776032), transcript variant X2, mRNA	1150	64.13	184	3e-68	244
	UN000634	XM_011625485.2	uncharacterized LOC18435345 (LOC18435345), transcript variant X3, mRNA	1672	51.41	531	6e-129	411		XM_009395820.2	uncharacterized LOC103979654 (LOC103979654), transcript variant X1, mRNA	1381	47.27	531	5e-113	365		XM_020540802.1	uncharacterized LOC103632633 (LOC103632633), transcript variant X7, mRNA	1187	45.66	346	2e-78	267		XM_010324211.2	uncharacterized LOC101249932 (LOC101249932), mRNA	1420	46.9	548	1e-108	353		XM_010657092.2	uncharacterized LOC100247051 (LOC100247051), transcript variant X3, mRNA	1490	52.78	540	2e-133	421		XM_020561474.1	uncharacterized LOC18778249 (LOC18778249), mRNA	1448	49.17	539	1e-118	381
	UN000635	XM_006840627.3	DEAD-box ATP-dependent RNA helicase 46 (LOC18430474), transcript variant X1, mRNA	910	71.79	78	2e-19	94		XM_009401929.2	DEAD-box ATP-dependent RNA helicase 46 (LOC103984442), transcript variant X1, mRNA	1150	75	84	3e-23	107		NM_001174583.1	NM_001174583.1 length 672 aa, 2019 bp, from 102..2120 of NM_001174583.1 Zea mays putative DEAD-box ATP-dependent RNA helicase family protein (LOC100381784), mRNA	672	76.47	51	8e-19	92.4		XM_010320983.2	DEAD-box ATP-dependent RNA helicase 46 (LOC101266555), mRNA	1183	75.61	82	2e-23	107		XM_010651357.2	DEAD-box ATP-dependent RNA helicase 46 (LOC100252874), transcript variant X5, mRNA	1153	78.57	84	3e-22	103		XM_007227006.2	DEAD-box ATP-dependent RNA helicase 46 (LOC18793091), mRNA	1129	69.05	84	2e-19	94.7
	UN000636	---	---	0	---	---	---	---		XM_009422358.2	probable protein NAP1 (LOC104000341), transcript variant X1, mRNA	1401	51.85	54	6e-08	58.5		---	---	0	---	---	---	---		---	---	0	---	---	---	---		XM_002276425.3	protein NAP1 (LOC100264488), mRNA	1386	53.7	54	1e-08	60.5		XM_020561923.1	protein NAP1 (LOC18778984), transcript variant X1, mRNA	1411	43.28	67	4e-08	58.5
	UN000637	XM_006854083.3	alpha-glucosidase 2 (LOC18443903), transcript variant X1, mRNA	1061	74.9	992	0	1571		XM_018820658.1	alpha-glucosidase 2 (LOC103970541), transcript variant X2, mRNA	1086	75.74	985	0	1561		XM_008671854.2	alpha-glucosidase 2 (LOC103647311), transcript variant X2, mRNA	1055	71.62	976	0	1444		XM_004245952.3	alpha-glucosidase 2 (LOC101249477), mRNA	1074	74.17	995	0	1570		XM_010667180.2	alpha-glucosidase 2 (LOC100254505), transcript variant X2, mRNA	1000	78.64	997	0	1652		XM_020563663.1	alpha-glucosidase 2 (LOC18777514), transcript variant X1, mRNA	1066	76.2	1000	0	1630
	UN000638	XM_006852216.3	lysine-specific demethylase REF6 (LOC18441992), transcript variant X1, mRNA	1316	48.7	1386	0	1112		XM_009384639.2	lysine-specific demethylase REF6-like (LOC103970732), transcript variant X1, mRNA	1335	55.77	1361	0	1332		XM_008658744.2	lysine-specific demethylase JMJ705 (LOC103636385), mRNA	1353	51.64	703	0	615		XM_004236265.2	lysine-specific demethylase REF6 (LOC101257458), mRNA	1252	59.88	678	0	747		XM_010664753.2	lysine-specific demethylase REF6 (LOC100241632), mRNA	1329	56.3	1373	0	1373		XM_020563757.1	lysine-specific demethylase REF6 (LOC18776764), mRNA	1489	56.18	1036	0	1074
	UN000641	XM_020667391.1	endoribonuclease Dicer homolog 2 (LOC18434643), transcript variant X2, mRNA	1421	54.65	1376	0	1399		XM_018818223.1	endoribonuclease Dicer homolog 4 (LOC103998682), transcript variant X2, mRNA	1646	34.29	1432	0	665		XM_008682860.2	dicer-like 105 (LOC100192986), transcript variant X1, mRNA	1401	47.72	1381	0	1194		NM_001329413.1	NM_001329413.1 length 1423 aa, 4272 bp, from 22..4293 of NM_001329413.1 Solanum lycopersicum endoribonuclease Dicer 2c (DCL2c), mRNA	1423	53.39	1373	0	1405		XM_010650912.2	endoribonuclease Dicer homolog 2 (LOC100258190), transcript variant X1, mRNA	1468	54.3	1372	0	1390		XM_020567131.1	endoribonuclease Dicer homolog 2 (LOC18772497), transcript variant X3, mRNA	1457	54.53	1370	0	1450
	UN000642	XM_006838224.3	protein OBERON 3 (LOC18428928), mRNA	1335	49.2	872	0	669		XM_009391263.2	protein OBERON 4-like (LOC103976077), mRNA	1336	49.12	857	0	691		XM_008662175.2	protein OBERON 4-like (LOC103639433), mRNA	1342	39.4	830	4e-165	524		XM_004229595.3	protein OBERON 4 (LOC101250443), mRNA	1201	48.52	843	0	666		XM_002274260.3	protein OBERON 4 (LOC100248244), mRNA	1219	55.76	834	0	795		XM_020557628.1	protein OBERON 4 (LOC18787122), mRNA	1234	51.38	909	0	739
	UN000644	XM_020671057.1	uncharacterized LOC110007798 (LOC110007798), mRNA	288	31.2	266	2e-37	141		---	---	0	---	---	---	---		XM_020543849.1	enhancer of zeste 2 (mez2), transcript variant X1, mRNA	1216	29.73	676	3e-80	278		XM_004242476.1	uncharacterized LOC101258077 (LOC101258077), mRNA	1454	32.84	682	8e-114	374		XM_010657936.2	uncharacterized LOC104880636 (LOC104880636), mRNA	1106	31.01	690	2e-96	321		XM_020557148.1	uncharacterized LOC109947231 (LOC109947231), mRNA	1367	32.41	688	2e-99	333
	UN000652	XM_006840464.3	pentatricopeptide repeat-containing protein At3g06920 (LOC18430305), transcript variant X10, mRNA	892	74.5	855	0	1364		XM_009414636.2	pentatricopeptide repeat-containing protein At3g06920 (LOC103994311), transcript variant X1, mRNA	956	72.88	874	0	1351		XM_020541032.1	pentatricopeptide repeat-containing protein At3g06920 (LOC103633782), transcript variant X1, mRNA	879	66.07	834	0	1149		XM_004229521.3	pentatricopeptide repeat-containing protein At3g06920 (LOC101248045), transcript variant X1, mRNA	920	75	840	0	1343		XM_010651418.2	pentatricopeptide repeat-containing protein At3g06920 (LOC100249392), transcript variant X1, mRNA	900	72.98	892	0	1362		XM_020570890.1	pentatricopeptide repeat-containing protein At3g06920 (LOC18791697), transcript variant X1, mRNA	897	72.54	885	0	1353
	UN000653	XM_020662601.1	transcription factor MYB3R-4 (LOC18426614), transcript variant X3, mRNA	900	68.75	256	2e-104	350		XM_018822668.1	myb-related protein 3R-1-like (LOC103976479), transcript variant X2, mRNA	1086	45.85	530	2e-120	398		XM_008675131.2	Myb-related protein 3R-1 (LOC100502241), transcript variant X2, mRNA	846	79.79	188	7e-101	339		XM_004245217.3	myb-related protein 3R-1-like (LOC101259775), transcript variant X1, mRNA	1059	53.96	391	7e-119	393		XM_010650213.2	myb-related protein 3R-1 (LOC100261001), transcript variant X1, mRNA	1064	43.84	1152	0	737		XM_020563685.1	transcription factor MYB3R-1 (LOC18789423), mRNA	1038	42.83	1172	0	702
	UN000656	XM_020664850.1	uncharacterized LOC18430075 (LOC18430075), transcript variant X1, mRNA	1417	46.85	222	3e-52	202		XM_009400414.2	WD repeat-containing protein 6 (LOC103983215), transcript variant X1, mRNA	1374	44.92	236	3e-44	176		XM_020543996.1	WD repeat-containing protein 6 (LOC103639610), transcript variant X1, mRNA	1352	48.99	198	8e-42	169		XM_004229246.3	uncharacterized LOC101246276 (LOC101246276), mRNA	1382	47.09	206	1e-44	177		XM_019221162.1	uncharacterized LOC100257191 (LOC100257191), transcript variant X3, mRNA	1403	50.68	219	7e-49	191		XM_020558999.1	uncharacterized LOC18788031 (LOC18788031), transcript variant X1, mRNA	1387	50.7	215	3e-44	176
	UN000657	XM_006840465.3	uncharacterized LOC18430306 (LOC18430306), mRNA	869	70.14	834	0	1142		XM_009388213.2	uncharacterized LOC103973596 (LOC103973596), transcript variant X1, mRNA	874	72	825	0	1168		XM_008674867.2	BTB/POZ domain-containing protein (TIDP2945), transcript variant X1, mRNA	801	60.8	824	0	970		XM_004229441.3	uncharacterized LOC101246086 (LOC101246086), mRNA	894	67.43	826	0	1089		XM_010651417.2	uncharacterized LOC100254500 (LOC100254500), mRNA	891	74.61	827	0	1244		XM_007225236.2	uncharacterized LOC18791478 (LOC18791478), mRNA	871	75.63	829	0	1249
	UN000659	XM_020672824.1	uncharacterized LOC18443063 (LOC18443063), transcript variant X3, mRNA	1371	51.38	181	4e-45	179		XM_018828823.1	uncharacterized LOC103993114 (LOC103993114), mRNA	567	61.22	49	6e-10	64.3		XM_020538319.1	uncharacterized LOC100273882 (LOC100273882), transcript variant X4, mRNA	1049	50.86	175	5e-38	156		XM_010315667.2	uncharacterized LOC101249336 (LOC101249336), mRNA	1355	52.51	179	9e-42	168		XM_010646845.2	uncharacterized LOC100246156 (LOC100246156), transcript variant X1, mRNA	1403	57.14	182	8e-50	194		XM_007213447.2	uncharacterized LOC18778936 (LOC18778936), mRNA	1358	56.59	182	9e-43	171
	UN000660	XM_020664282.1	DNA-directed RNA polymerases IV and V subunit 2 (LOC18422397), transcript variant X3, mRNA	1221	61.07	822	0	1020		XM_009415243.2	DNA-directed RNA polymerases IV and V subunit 2-like (LOC103994808), transcript variant X1, mRNA	1199	68.35	812	0	1178		NM_001190370.1	NM_001190370.1 length 1229 aa, 3690 bp, from 1..3690 of NM_001190370.1 Zea mays required to maintain repression 7 (rmr7), mRNA	1229	62.85	813	0	1094		XM_004236313.3	DNA-directed RNA polymerases IV and V subunit 2 (LOC778349), mRNA	1217	67.36	818	0	1139		XM_002283260.4	DNA-directed RNA polymerases IV and V subunit 2 (LOC100256013), transcript variant X1, mRNA	1198	67.8	826	0	1165		XM_007225380.2	DNA-directed RNA polymerases IV and V subunit 2 (LOC18790113), mRNA	1203	65.32	819	0	1098
	UN000661	XM_020672724.1	uncharacterized LOC18423411 (LOC18423411), transcript variant X3, mRNA	1270	37.68	1295	0	725		XM_018826741.1	uncharacterized LOC103985271 (LOC103985271), transcript variant X1, mRNA	1078	37.68	1189	0	639		XM_008662093.2	P-loop containing nucleoside triphosphate hydrolase superfamily protein (LOC103639335), transcript variant X1, mRNA	1287	31.61	753	2e-91	323		XM_010324617.2	uncharacterized LOC101250607 (LOC101250607), transcript variant X3, mRNA	1334	36.14	1237	0	617		XM_010665920.2	uncharacterized LOC104882466 (LOC104882466), mRNA	1322	42.51	1261	0	840		XM_020555087.1	uncharacterized LOC18793107 (LOC18793107), mRNA	1210	42.24	696	8e-145	470
	UN000662	XM_020672418.1	alpha-glucan water dikinase, chloroplastic (LOC18442600), transcript variant X1, mRNA	1329	65.91	1314	0	1785		XM_009419385.2	alpha-glucan water dikinase 2 (LOC103998021), transcript variant X4, mRNA	1303	64.78	1272	0	1741		XM_008649791.2	Alpha-glucan water dikinase 1 chloroplastic (AY109804), transcript variant X1, mRNA	1469	56.37	1185	0	1342		NM_001247476.2	NM_001247476.2 length 1465 aa, 4398 bp, from 1..4398 of NM_001247476.2 Solanum lycopersicum glucan water dikinase (GWD), mRNA	1465	51.5	1365	0	1370		XM_002270449.3	alpha-glucan water dikinase, chloroplastic (LOC100246568), transcript variant X2, mRNA	1470	51.99	1360	0	1399		XM_020555723.1	alpha-glucan water dikinase 2 (LOC18792306), transcript variant X1, mRNA	1302	65.92	1288	0	1765
	UN000663	XM_006849493.3	uncharacterized LOC18439326 (LOC18439326), mRNA	1259	79.32	503	0	786		XM_009410374.2	uncharacterized LOC103991019 (LOC103991019), transcript variant X1, mRNA	1267	77.89	502	0	754		XM_008646664.2	hypothetical protein (LOC103626274), mRNA	1146	56.58	866	0	736		XM_004249140.3	uncharacterized LOC101258014 (LOC101258014), mRNA	1254	76.08	510	0	764		XM_003632633.3	uncharacterized LOC100257222 (LOC100257222), transcript variant X1, mRNA	1284	65.52	902	0	961		XM_007203149.2	uncharacterized LOC18769173 (LOC18769173), transcript variant X2, mRNA	1262	79.92	503	0	784
	UN000664	XM_020670698.1	kinesin-like protein KIN-14I (LOC18439629), mRNA	1295	75.33	1273	0	1853		XM_009393590.2	kinesin-like calmodulin-binding protein homolog (LOC103977931), transcript variant X2, mRNA	1335	76.09	1267	0	1878		XM_008665484.2	kinesin-like protein KIN-14I (LOC103642170), transcript variant X1, mRNA	1261	74.76	1248	0	1791		XM_004233227.3	kinesin-like protein KIN-14E (LOC101267960), transcript variant X1, mRNA	1265	74.27	1271	0	1831		XM_002263113.4	kinesin-like calmodulin-binding protein homolog (LOC100261900), mRNA	1277	81.2	1271	0	1975		XM_007204261.2	kinesin-like protein KIN-14E (LOC18769364), mRNA	1271	79.56	1272	0	1915
	UN000666	XM_020670725.1	pre-mRNA-splicing factor ATP-dependent RNA helicase DEAH7 (LOC18439651), transcript variant X9, mRNA	1285	74.5	1306	0	1796		XM_009382760.2	probable pre-mRNA-splicing factor ATP-dependent RNA helicase DEAH5 (LOC103969268), mRNA	1181	47.94	826	0	732		XM_008672215.2	pre-mRNA-splicing factor ATP-dependent RNA helicase DEAH7 (LOC103647704), transcript variant X1, mRNA	1325	73.6	1269	0	1732		XM_004249042.3	pre-mRNA-splicing factor ATP-dependent RNA helicase DEAH7 (LOC101253638), mRNA	1326	75.96	1302	0	1791		XM_010657213.1	pre-mRNA-splicing factor ATP-dependent RNA helicase DEAH7 (LOC100261447), transcript variant X1, mRNA	1310	80.06	1299	0	1969		XM_007227009.2	pre-mRNA-splicing factor ATP-dependent RNA helicase DEAH7 (LOC18792838), transcript variant X1, mRNA	1306	77.33	1310	0	1872
	UN000668	XM_006845530.3	uncharacterized LOC18435486 (LOC18435486), mRNA	1179	78.42	380	0	608		XM_009405049.2	uncharacterized LOC103986903 (LOC103986903), transcript variant X1, mRNA	1154	72.84	405	0	598		XM_008681015.2	uncharacterized LOC103654189 (LOC103654189), transcript variant X1, mRNA	1113	76.53	375	0	598		XM_010324937.2	serine/threonine-protein kinase ppk1 (LOC101268698), transcript variant X4, mRNA	969	79.02	367	0	594		XM_010658515.2	uncharacterized LOC100266729 (LOC100266729), transcript variant X1, mRNA	1206	83.47	363	0	619		XM_007227005.2	uncharacterized LOC18790119 (LOC18790119), mRNA	1112	82.14	364	0	619
	UN000669	XM_006833365.3	protein phosphatase 2C and cyclic nucleotide-binding/kinase domain-containing protein (LOC18426723), transcript variant X1, mRNA	1080	70.82	1083	0	1520		XM_009423183.2	protein phosphatase 2C and cyclic nucleotide-binding/kinase domain-containing protein (LOC104001012), transcript variant X2, mRNA	1073	72.73	1078	0	1582		NM_001320440.1	NM_001320440.1 length 1094 aa, 3285 bp, from 407..3691 of NM_001320440.1 Zea mays Protein phosphatase 2C and cyclic nucleotide-binding/kinase domain-containing protein (LOC100279221), mRNA	1094	66.23	1075	0	1408		XM_004239218.3	protein phosphatase 2C and cyclic nucleotide-binding/kinase domain-containing protein (LOC101265334), transcript variant X1, mRNA	1085	70.54	1083	0	1538		XM_010657981.2	protein phosphatase 2C and cyclic nucleotide-binding/kinase domain-containing protein (LOC100266345), transcript variant X1, mRNA	1122	77.51	1085	0	1667		XM_007203924.2	protein phosphatase 2C and cyclic nucleotide-binding/kinase domain-containing protein (LOC18770567), transcript variant X1, mRNA	1080	73.59	1083	0	1595
	UN000670	XM_006851817.3	U-box domain-containing protein 43 (LOC18441587), mRNA	1025	56.16	1015	0	1091		XM_009397100.2	U-box domain-containing protein 44-like (LOC103980646), mRNA	1064	56.72	1005	0	1075		NM_001136919.1	NM_001136919.1 length 715 aa, 2148 bp, from 12..2159 of NM_001136919.1 Zea mays U-box domain-containing protein 44 (LOC100191487), mRNA	715	37.19	605	1e-113	367		XM_010328927.2	U-box domain-containing protein 44-like (LOC101259371), transcript variant X1, mRNA	993	55.52	996	0	1046		XM_010663679.2	U-box domain-containing protein 43 (LOC100248467), transcript variant X1, mRNA	1006	60.52	1008	0	1161		XM_007220218.2	U-box domain-containing protein 44 (LOC18787137), transcript variant X1, mRNA	1016	60.56	1009	0	1181
	UN000671	XM_006849823.3	probable cellulose synthase A catalytic subunit 5 [UDP-forming] (LOC18439664), mRNA	1095	90.98	1098	0	1900		XM_009410159.2	probable cellulose synthase A catalytic subunit 5 [UDP-forming] (LOC103990871), mRNA	1091	86.93	1094	0	1842		NM_001111486.2	NM_001111486.2 length 1089 aa, 3270 bp, from 179..3448 of NM_001111486.2 Zea mays cellulose synthase 6 (cesa6), mRNA	1089	82.59	1097	0	1785		XM_004238471.3	probable cellulose synthase A catalytic subunit 3 [UDP-forming] (LOC101263703), mRNA	1087	77.52	1090	0	1604		XM_002277677.3	probable cellulose synthase A catalytic subunit 5 [UDP-forming] (LOC100242715), mRNA	1091	91.32	1094	0	1900		XM_020563690.1	probable cellulose synthase A catalytic subunit 3 [UDP-forming] (LOC18775669), transcript variant X1, mRNA	1103	87.95	1104	0	1832
	UN000674	XM_020676281.1	alpha-aminoadipic semialdehyde synthase (LOC18423952), transcript variant X2, mRNA	1070	71.09	1062	0	1485		XM_009382435.2	alpha-aminoadipic semialdehyde synthase (LOC103969029), transcript variant X1, mRNA	1068	72.76	1061	0	1531		XM_008679550.2	lysine-ketoglutarate reductase/saccharopine dehydrogenase 1 (lkrsdh1), transcript variant X3, mRNA	1049	67.7	1062	0	1412		XM_004242854.3	alpha-aminoadipic semialdehyde synthase (LOC101261722), mRNA	1051	68.81	1058	0	1422		XM_010657765.2	alpha-aminoadipic semialdehyde synthase (LOC100268037), transcript variant X1, mRNA	1057	73.84	1059	0	1540		XM_007203925.2	alpha-aminoadipic semialdehyde synthase (LOC18769367), mRNA	1050	71.55	1058	0	1503
	UN000675	XM_006849493.3	uncharacterized LOC18439326 (LOC18439326), mRNA	1259	78.53	503	0	783		XM_009410374.2	uncharacterized LOC103991019 (LOC103991019), transcript variant X1, mRNA	1267	77.49	502	0	756		XM_008646664.2	hypothetical protein (LOC103626274), mRNA	1146	73.31	487	0	707		XM_004249140.3	uncharacterized LOC101258014 (LOC101258014), mRNA	1254	75.69	510	0	765		XM_003632633.3	uncharacterized LOC100257222 (LOC100257222), transcript variant X1, mRNA	1284	80.47	507	0	803		XM_007203149.2	uncharacterized LOC18769173 (LOC18769173), transcript variant X2, mRNA	1262	79.72	503	0	787
	UN000676	XM_006839123.3	protein SPA1-RELATED 4 (LOC18429848), transcript variant X1, mRNA	1139	49.1	1167	0	983		XM_009422797.2	protein SUPPRESSOR OF PHYA-105 1-like (LOC104000689), transcript variant X1, mRNA	1076	50	1100	0	948		XM_020539119.1	Protein SUPPRESSOR OF PHYA-105 1 (LOC100384276), transcript variant X4, mRNA	1120	46.09	1100	0	838		XM_019215273.1	protein SPA1-RELATED 2 (LOC101263834), mRNA	1086	48.49	1025	0	871		XM_002276649.4	protein SUPPRESSOR OF PHYA-105 1 (LOC100256812), transcript variant X1, mRNA	1087	50.65	1084	0	959		XM_007210349.2	protein SPA1-RELATED 2 (LOC18777518), mRNA	1084	53.11	1028	0	957
	UN000677	XM_020663224.1	nuclear pore complex protein NUP133 (LOC18427643), transcript variant X2, mRNA	1302	59.06	1324	0	1528		XM_009409107.2	nuclear pore complex protein NUP133 (LOC103990080), mRNA	1321	60.26	1326	0	1566		XM_020543794.1	uncharacterized LOC100384809 (TIDP3498), transcript variant X1, mRNA	1289	55.73	1326	0	1428		XM_004243502.3	nuclear pore complex protein NUP133 (LOC101253396), mRNA	1322	61.53	1323	0	1635		XM_002271985.3	nuclear pore complex protein NUP133 (LOC100249432), mRNA	1330	64.68	1325	0	1728		XM_007217026.2	nuclear pore complex protein NUP133 (LOC18781862), transcript variant X2, mRNA	1322	62.78	1322	0	1669
	UN000678	XM_020674921.1	myb-binding protein 1A-like protein (LOC18446449), transcript variant X1, mRNA	1339	53.7	1242	0	1149		XM_009391324.2	DNA polymerase V (LOC103976129), transcript variant X2, mRNA	1290	58.44	1297	0	1282		XM_008647003.2	uncharacterized LOC103626594 (LOC103626594), mRNA	1272	49.21	1262	0	1054		XM_019211856.1	DNA polymerase V-like (LOC101264257), transcript variant X1, mRNA	1274	57.26	1219	0	1202		XM_010649744.2	DNA polymerase V (LOC100268096), mRNA	1289	62.08	1295	0	1364		XM_007201160.2	DNA polymerase V (LOC18766861), mRNA	1282	58.79	1286	0	1302
	UN000679	XM_006849808.3	stromal processing peptidase, chloroplastic (LOC18439648), mRNA	1277	72.85	1256	0	1831		XM_009393587.2	stromal processing peptidase, chloroplastic (LOC103977928), mRNA	1278	77.12	1167	0	1810		XM_008661586.2	Stromal processing peptidase chloroplastic (LOC103638768), mRNA	1286	69.83	1233	0	1685		XM_004235699.3	stromal processing peptidase, chloroplastic (LOC101262797), transcript variant X1, mRNA	1245	73.85	1193	0	1741		XM_002277508.4	stromal processing peptidase, chloroplastic (LOC100266746), transcript variant X3, mRNA	1276	76.1	1251	0	1877		XM_020567972.1	stromal processing peptidase, chloroplastic (LOC18770862), transcript variant X1, mRNA	1265	73.98	1199	0	1752
	UN000681	XM_020662542.1	uncharacterized LOC18426554 (LOC18426554), transcript variant X3, mRNA	1195	40.98	549	5e-88	310		XM_009403641.2	uncharacterized LOC103985801 (LOC103985801), transcript variant X2, mRNA	1132	41.07	1220	0	608		XM_008671363.2	uncharacterized LOC103646653 (LOC103646653), mRNA	967	51.52	198	2e-53	204		XM_010327013.2	uncharacterized LOC101260367 (LOC101260367), transcript variant X1, mRNA	1130	47.98	496	8e-89	311		XM_002272194.3	uncharacterized LOC100244469 (LOC100244469), mRNA	1177	47.59	1202	0	793		XM_020563593.1	uncharacterized LOC18776117 (LOC18776117), transcript variant X1, mRNA	1129	44.54	1208	0	695
	UN000683	XM_020669855.1	kinesin-like protein KIN-12B (LOC18438199), transcript variant X2, mRNA	1206	62.96	602	0	607		XM_009417667.2	kinesin-like protein KIN-12A (LOC103996701), mRNA	1300	63.67	600	0	656		XM_020545210.1	uncharacterized LOC100502013 (LOC100502013), transcript variant X1, mRNA	1142	48.97	584	4e-129	429		XM_010316441.2	kinesin-like protein KIN-12B (LOC101262096), mRNA	1318	59.9	616	0	592		XM_010652033.2	kinesin-like protein KIN-12B (LOC100264192), mRNA	1383	65.98	732	0	731		XM_007225396.2	kinesin-like protein KIN-12B (LOC18790737), mRNA	1340	64.31	678	0	674
	UN000684	XM_006849325.3	phytosulfokine receptor 2 (LOC18439185), transcript variant X1, mRNA	1051	67.85	1039	0	1256		XM_009390608.2	phytosulfokine receptor 2 (LOC103975599), mRNA	1017	63.92	1042	0	1167		XM_008647734.2	phytosulfokine receptor 1 (LOC103627437), mRNA	1087	51.07	1030	0	881		XM_004244191.3	phytosulfokine receptor 2 (LOC101258171), mRNA	1058	64.49	1042	0	1147		XM_002282552.3	phytosulfokine receptor 2 (LOC100260504), mRNA	1063	68.2	1044	0	1276		XM_007213648.2	phytosulfokine receptor 2 (LOC18779076), mRNA	1084	66.95	1041	0	1242
	UN000685	XM_011629150.2	uncharacterized LOC18423670 (LOC18423670), transcript variant X1, mRNA	1037	43.7	1064	0	702		XM_009384603.2	uncharacterized LOC103970709 (LOC103970709), transcript variant X1, mRNA	1104	68.42	342	5e-152	480		NM_001322025.1	NM_001322025.1 length 1177 aa, 3534 bp, from 269..3802 of NM_001322025.1 Zea mays RNA binding (RRM/RBD/RNP motifs) family protein (LOC100384257), mRNA	1177	59.94	347	6e-132	429		XM_004240295.3	uncharacterized LOC101247127 (LOC101247127), transcript variant X6, mRNA	1026	40.75	1070	0	661		XM_002281859.4	general negative regulator of transcription subunit 4 (LOC100267264), transcript variant X1, mRNA	1027	48.51	1072	0	864		XM_020566623.1	uncharacterized LOC18775447 (LOC18775447), transcript variant X1, mRNA	1069	45.96	1064	0	775
	UN000686	XM_006849823.3	probable cellulose synthase A catalytic subunit 5 [UDP-forming] (LOC18439664), mRNA	1095	90.68	1095	0	1891		XM_009410159.2	probable cellulose synthase A catalytic subunit 5 [UDP-forming] (LOC103990871), mRNA	1091	86.71	1091	0	1837		NM_001111486.2	NM_001111486.2 length 1089 aa, 3270 bp, from 179..3448 of NM_001111486.2 Zea mays cellulose synthase 6 (cesa6), mRNA	1089	81.92	1095	0	1769		XM_004238471.3	probable cellulose synthase A catalytic subunit 3 [UDP-forming] (LOC101263703), mRNA	1087	77.09	1087	0	1598		XM_002277677.3	probable cellulose synthase A catalytic subunit 5 [UDP-forming] (LOC100242715), mRNA	1091	90.83	1091	0	1888		XM_020563690.1	probable cellulose synthase A catalytic subunit 3 [UDP-forming] (LOC18775669), transcript variant X1, mRNA	1103	87.66	1102	0	1822
	UN000687	XM_020662833.1	protein ALWAYS EARLY 3 (LOC18427125), transcript variant X5, mRNA	1137	52.53	415	3e-85	300		XM_009405935.2	protein ALWAYS EARLY 2-like (LOC103987594), transcript variant X2, mRNA	1195	58.35	413	1e-98	340		XM_008663324.2	Putative MYB DNA-binding domain superfamily protein (LOC100272535), transcript variant X2, mRNA	1147	53.14	414	1e-92	322		XM_010322815.1	protein ALWAYS EARLY 3 (LOC101249204), transcript variant X2, mRNA	1147	47.48	417	4e-83	295		XM_010651453.2	protein ALWAYS EARLY 3 (LOC100261468), mRNA	1205	60.81	421	2e-122	406		XM_020567417.1	protein ALWAYS EARLY 2 (LOC18772125), transcript variant X8, mRNA	1118	52.91	412	1e-92	322
	UN000688	XM_006843641.3	uncharacterized LOC18433557 (LOC18433557), mRNA	925	47.83	989	0	724		XM_009412242.2	uncharacterized LOC103992518 (LOC103992518), mRNA	883	45.52	971	0	688		NM_001174558.1	NM_001174558.1 length 916 aa, 2751 bp, from 6..2756 of NM_001174558.1 Zea mays uncharacterized LOC100381756 (cl28127_1), mRNA	916	63.29	365	3e-151	471		XM_004246224.3	uncharacterized LOC101256025 (LOC101256025), mRNA	849	68.79	346	1e-165	506		XM_010655045.2	uncharacterized LOC100258499 (LOC100258499), transcript variant X5, mRNA	878	49.25	930	0	744		XM_007208107.2	uncharacterized LOC18773696 (LOC18773696), mRNA	895	48.36	885	0	687
	UN000689	XM_006836367.3	probable LRR receptor-like serine/threonine-protein kinase At4g20940 (LOC18427314), transcript variant X1, mRNA	1098	63.89	1069	0	1175		XM_009399111.2	probable LRR receptor-like serine/threonine-protein kinase At4g20940 (LOC103982239), transcript variant X1, mRNA	1159	70.92	1066	0	1371		NM_001348141.1	NM_001348141.1 length 1079 aa, 3240 bp, from 567..3806 of NM_001348141.1 Zea mays probable LRR receptor-like serine/threonine-protein kinase (LOC103648322), mRNA	1079	66.35	1058	0	1283		XM_004233109.3	probable LRR receptor-like serine/threonine-protein kinase At4g20940 (LOC101257924), mRNA	1083	72.16	1067	0	1395		XM_002264003.3	probable LRR receptor-like serine/threonine-protein kinase At4g20940 (LOC100247557), mRNA	1070	74.33	1052	0	1375		XM_020561934.1	probable LRR receptor-like serine/threonine-protein kinase At4g20940 (LOC18778202), transcript variant X3, mRNA	1063	72.77	1054	0	1407
	UN000690	XM_020669906.1	histidine kinase 3 (LOC18438004), mRNA	1047	64.76	1033	0	1329		XM_009388030.2	probable histidine kinase 3 (LOC103973460), transcript variant X1, mRNA	1023	69.29	1029	0	1457		NM_001347120.1	NM_001347120.1 length 1007 aa, 3024 bp, from 539..3562 of NM_001347120.1 Zea mays Putative histidine kinase family protein (LOC100274238), mRNA	1007	64.38	1019	0	1278		XM_004239176.3	histidine kinase 3 (LOC101247719), mRNA	1032	67.7	1028	0	1405		XM_002276925.3	histidine kinase 3 (LOC100247122), transcript variant X2, mRNA	1042	73.86	1033	0	1550		XM_007226969.2	histidine kinase 3 (LOC18790186), mRNA	1062	72.14	1030	0	1528
	UN000692	XM_011623132.2	armadillo repeat-containing protein 8 (LOC18428987), mRNA	649	59.97	647	0	729		XM_009388179.2	armadillo repeat-containing protein 8 (LOC103973572), transcript variant X2, mRNA	677	58.58	664	0	711		NM_001301574.1	NM_001301574.1 length 688 aa, 2067 bp, from 59..2125 of NM_001301574.1 Zea mays armadillo repeat-containing protein 8-like (LOC103648171), mRNA	688	54.74	623	0	608		XM_004250894.3	armadillo repeat-containing protein 8 (LOC101250078), mRNA	674	59.79	654	0	725		XM_002282749.4	armadillo repeat-containing protein 8 (LOC100246814), transcript variant X1, mRNA	669	67.53	656	0	852		XM_020561439.1	uncharacterized protein C26H5.04 (LOC18780260), mRNA	740	63.17	657	0	795
	UN000693	XM_006844581.3	uncharacterized LOC18434511 (LOC18434511), transcript variant X1, mRNA	1095	69.27	1061	0	1202		XM_009395470.2	uncharacterized LOC103979353 (LOC103979353), mRNA	1121	75.35	1059	0	1294		XM_008672531.2	no exine formation 1 (LOC103648029), mRNA	1131	70.33	1038	0	1194		XM_004253186.3	uncharacterized LOC101250387 (LOC101250387), mRNA	1144	71.59	1070	0	1316		XM_002268181.3	uncharacterized LOC100259097 (LOC100259097), mRNA	1152	74.53	1068	0	1335		XM_007221814.2	uncharacterized LOC18788560 (LOC18788560), mRNA	1122	71.75	1069	0	1300
	UN000695	XM_006854337.3	purple acid phosphatase 23 (LOC18444159), mRNA	541	77.5	520	0	855		XM_009396568.2	purple acid phosphatase 23 (LOC103980239), transcript variant X1, mRNA	552	78.85	520	0	845		XM_008678207.2	chloroplast purple acid phosphatase isoform c (LOC100191449), transcript variant X2, mRNA	603	71.97	528	0	780		XM_004237423.3	purple acid phosphatase 23 (LOC101259532), transcript variant X1, mRNA	533	77.5	511	0	829		XM_002283115.4	purple acid phosphatase 23 (LOC100252886), transcript variant X1, mRNA	556	81.59	516	0	883		XM_007223004.2	purple acid phosphatase 23 (LOC18788670), mRNA	603	80.78	515	0	875
	UN000696	XM_011625015.2	uncharacterized LOC18433947 (LOC18433947), mRNA	796	41.9	389	5e-63	225		XM_009393487.2	bromodomain adjacent to zinc finger domain protein 1A-like (LOC103977850), transcript variant X1, mRNA	747	36.2	815	3e-108	347		NM_001157994.1	NM_001157994.1 length 733 aa, 2202 bp, from 63..2264 of NM_001157994.1 Zea mays PHD-finger family protein (LOC100285099), mRNA	733	49.25	201	1e-43	169		XM_004241568.3	uncharacterized LOC101264529 (LOC101264529), mRNA	652	33.69	742	7e-92	300		XM_002273266.4	autophagy-related protein 36 (LOC100266325), mRNA	648	38.77	766	6e-123	382		XM_007208652.2	eukaryotic translation initiation factor 5B (LOC18772812), transcript variant X1, mRNA	828	54.34	173	7e-42	164
	UN000697	XM_006836305.3	KH domain-containing protein At4g18375 (LOC18427252), transcript variant X1, mRNA	619	55.86	666	0	650		XM_009405019.2	KH domain-containing protein At4g18375 (LOC103986881), transcript variant X1, mRNA	621	58.81	658	0	713		NM_001345920.1	NM_001345920.1 length 632 aa, 1899 bp, from 145..2043 of NM_001345920.1 Zea mays RNA-binding KH domain-containing protein (LOC100384498), mRNA	632	50.15	664	0	572		XM_004244923.3	KH domain-containing protein At4g18375 (LOC101248503), transcript variant X1, mRNA	617	57.23	664	0	662		XM_002278331.3	KH domain-containing protein At4g18375 (LOC100261680), mRNA	623	63.1	664	0	743		XM_020561877.1	KH domain-containing protein At4g18375 (LOC18780715), transcript variant X1, mRNA	642	61.9	664	0	718
	UN000698	XM_006849493.3	uncharacterized LOC18439326 (LOC18439326), mRNA	1259	76.94	503	0	758		XM_009410382.2	uncharacterized LOC103991019 (LOC103991019), transcript variant X3, mRNA	1259	77.13	494	0	738		XM_008646664.2	hypothetical protein (LOC103626274), mRNA	1146	71.66	487	0	682		XM_004249140.3	uncharacterized LOC101258014 (LOC101258014), mRNA	1254	74.12	510	0	740		XM_019221716.1	uncharacterized LOC100257222 (LOC100257222), transcript variant X2, mRNA	1276	80.16	499	0	785		XM_007203149.2	uncharacterized LOC18769173 (LOC18769173), transcript variant X2, mRNA	1262	78.13	503	0	761
	UN000700	XM_006845996.3	5-oxoprolinase (LOC18435963), transcript variant X1, mRNA	1264	81.43	1271	0	2095		XM_009417967.2	5-oxoprolinase (LOC103996908), transcript variant X1, mRNA	1264	82.36	1270	0	2154		XM_008659374.2	5-oxoprolinase (LOC103637109), mRNA	1264	81.33	1264	0	2109		XM_004246352.1	5-oxoprolinase (LOC101246654), transcript variant X1, mRNA	1268	81.59	1271	0	2110		XM_002262951.3	5-oxoprolinase (LOC100252923), transcript variant X1, mRNA	1269	84.74	1271	0	2177		XM_007218828.2	5-oxoprolinase (LOC18787387), mRNA	1266	82.7	1272	0	2170
	UN000702	XM_011625502.2	protein SMAX1-LIKE 2 (LOC18435411), mRNA	1050	50.28	1076	0	821		XM_018818378.1	protein SMAX1-like (LOC103995705), mRNA	1068	50.74	1080	0	873		XM_008680320.2	Protein SUPPRESSOR OF MAX2 1 (LOC103653403), mRNA	1103	43.37	1049	0	640		XM_004242612.3	SMAX1-like protein (LOC101262825), mRNA	1065	55.35	1066	0	960		XM_002266823.4	protein SUPPRESSOR OF MAX2 1 (LOC100260369), transcript variant X1, mRNA	1060	62.37	1039	0	1105		XM_007225341.2	protein SUPPRESSOR OF MAX2 1 (LOC18789533), transcript variant X1, mRNA	1060	58.78	1048	0	1023
	UN000703	XM_020663361.1	phospholipase SGR2 (LOC18427721), transcript variant X2, mRNA	992	65.06	976	0	1260		XM_009422210.2	phospholipase SGR2 (LOC104000223), transcript variant X1, mRNA	972	62.33	977	0	1176		NM_001348674.1	NM_001348674.1 length 936 aa, 2811 bp, from 107..2917 of NM_001348674.1 Zea mays uncharacterized LOC100381486 (LOC100381486), transcript variant 1, mRNA	936	57.54	961	0	1070		XM_010316888.2	phospholipase SGR2 (LOC101268214), transcript variant X1, mRNA	944	59.92	968	0	1157		XM_002275576.3	phospholipase SGR2 (LOC100260107), transcript variant X2, mRNA	963	63.66	966	0	1245		XM_020564455.1	phospholipase SGR2 (LOC18791935), mRNA	950	62.43	945	0	1154
	UN000705	XM_020664428.1	protein NETWORKED 1D (LOC18429645), transcript variant X1, mRNA	1881	31.53	590	1e-50	197		XM_009400275.2	protein NETWORKED 1D-like (LOC103983108), transcript variant X1, mRNA	1796	31.94	1268	7e-134	450		XM_008663729.2	protein NETWORKED 1A (LOC103640580), transcript variant X1, mRNA	1569	27.79	734	2e-54	209		XM_004247540.3	protein NETWORKED 1A (LOC101252434), mRNA	1866	32.44	857	2e-90	322		XM_010653699.2	protein NETWORKED 1D (LOC100852899), mRNA	1876	37.88	1328	0	605		XM_020570181.1	protein NETWORKED 1D (LOC18767555), transcript variant X1, mRNA	1805	35.93	782	7e-109	378
	UN000707	XM_006841726.3	myosin-1 (LOC18431605), transcript variant X1, mRNA	1236	60.18	226	6e-71	260		XM_018829987.1	myosin-1-like (LOC108953544), mRNA	207	53.33	210	1e-62	212		XM_020548579.1	myosin-3-like (LOC103647272), mRNA	1252	52.94	221	5e-59	223		XM_004231474.3	myosin-1 (LOC101253239), mRNA	1161	49.37	237	7e-52	200		XM_002281712.4	myosin-2 (LOC100241905), transcript variant X1, mRNA	1243	54.81	239	2e-58	221		XM_020561220.1	myosin-2 (LOC18779043), transcript variant X1, mRNA	1144	51.5	233	3e-57	217
	UN000708	XM_006858976.3	DNA-directed RNA polymerase II subunit RPB2 (RPB2), transcript variant X1, mRNA	1190	94.71	1173	0	2285		XM_018829208.1	DNA-directed RNA polymerase II subunit RPB2 (LOC103999650), mRNA	1208	95.91	1175	0	2306		XM_008646421.2	DNA-directed RNA polymerase II subunit RPB2 (LOC103626041), mRNA	1231	92.52	1176	0	2245		NM_001246960.2	NM_001246960.2 length 1191 aa, 3576 bp, from 200..3775 of NM_001246960.2 Solanum lycopersicum RNA polymerase II subunit 2 (rpb2), mRNA	1191	94.28	1188	0	2281		XM_002274015.3	DNA-directed RNA polymerase II subunit RPB2-like (LOC100252267), mRNA	1193	95.73	1194	0	2325		XM_007214497.2	DNA-directed RNA polymerase II subunit RPB2 (LOC18778996), mRNA	1192	93.7	1174	0	2266
	UN000711	XM_020668938.1	amino-acid permease BAT1 homolog (LOC18436890), transcript variant X2, mRNA	521	87.52	513	0	887		XM_009391243.2	amino-acid permease BAT1 homolog (LOC103976060), mRNA	515	90.45	513	0	907		NM_001139031.1	NM_001139031.1 length 573 aa, 1722 bp, from 30..1751 of NM_001139031.1 Zea mays Amino-acid permease BAT1 (si486073c04), mRNA	573	45.35	505	1e-147	435		XM_004238838.3	amino-acid permease BAT1 homolog (LOC101267235), transcript variant X3, mRNA	515	44.9	510	6e-146	429		XM_002274726.3	amino-acid permease BAT1 homolog (LOC100267875), transcript variant X2, mRNA	538	88.87	512	0	922		XM_007211520.2	amino-acid permease BAT1 homolog (LOC18779279), mRNA	525	89.47	513	0	923
	UN000712	XM_006854011.3	cellulose synthase-like protein D3 (LOC18443830), mRNA	1141	83.57	1150	0	1972		XM_009387963.2	cellulose synthase-like protein D2 (LOC103973407), mRNA	1150	83.33	1134	0	1931		XM_008660661.2	uncharacterized LOC100383550 (LOC100383550), transcript variant X1, mRNA	1294	81.26	1099	0	1870		XM_004245868.3	cellulose synthase-like protein D3 (LOC101249747), transcript variant X1, mRNA	1147	82.36	1134	0	1958		XM_002274860.2	cellulose synthase-like protein D3 (LOC100261385), mRNA	1149	86.19	1151	0	2047		XM_007220527.2	cellulose synthase-like protein D3 (LOC18786425), transcript variant X1, mRNA	1145	86.74	1146	0	2038
	UN000713	XM_006855324.3	uncharacterized LOC18445183 (LOC18445183), transcript variant X1, mRNA	1095	41.75	1121	0	724		XM_009383760.2	uncharacterized LOC103970110 (LOC103970110), transcript variant X1, mRNA	1054	41.21	1121	0	771		XM_008657312.2	DNAJ heat shock N-terminal domain-containing protein (LOC103634728), transcript variant X1, mRNA	1018	38.12	1115	0	639		XM_010314008.2	uncharacterized LOC101260185 (LOC101260185), mRNA	1086	37.48	1150	0	634		XM_002276921.3	uncharacterized LOC100244334 (LOC100244334), transcript variant X4, mRNA	1044	45.49	1108	0	874		XM_020566154.1	uncharacterized LOC18772858 (LOC18772858), transcript variant X1, mRNA	1115	41.96	746	1e-165	518
	UN000714	XM_006840760.3	phospholipid-transporting ATPase 1 (LOC18430657), transcript variant X1, mRNA	1252	71.16	1113	0	1575		XM_009404157.2	phospholipid-transporting ATPase 1 (LOC103986220), mRNA	1180	73.3	1120	0	1670		XM_008657008.2	phospholipid-transporting ATPase 1 (LOC103634601), mRNA	1136	69.15	1128	0	1553		XM_010329202.2	phospholipid-transporting ATPase 1 (LOC101252122), mRNA	1172	73.41	1117	0	1676		XM_019224478.1	phospholipid-transporting ATPase 1 (LOC100254060), transcript variant X2, mRNA	1247	75.63	1112	0	1727		XM_020557068.1	phospholipid-transporting ATPase 1 (LOC18787575), transcript variant X2, mRNA	1158	73.03	1116	0	1682
	UN000715	XM_006836844.3	cullin-associated NEDD8-dissociated protein 1 (LOC18427798), transcript variant X1, mRNA	1231	84.04	1222	0	1890		XM_009422887.2	cullin-associated NEDD8-dissociated protein 1 (LOC104000758), mRNA	1243	84.78	1222	0	1891		NM_001321674.1	NM_001321674.1 length 1219 aa, 3660 bp, from 260..3919 of NM_001321674.1 Zea mays Cullin-associated NEDD8-dissociated protein 1 (gpm596), mRNA	1219	81.56	1220	0	1860		XM_010315975.2	cullin-associated NEDD8-dissociated protein 1 (LOC101255836), transcript variant X1, mRNA	1222	81.33	1221	0	1818		XM_003633370.3	cullin-associated NEDD8-dissociated protein 1 (LOC100852578), transcript variant X1, mRNA	1218	85.5	1221	0	1912		XM_020557493.1	cullin-associated NEDD8-dissociated protein 1 (LOC18786212), mRNA	1217	83.37	1221	0	1856
	UN000716	XM_020675065.1	alpha-mannosidase 2 (LOC18446724), transcript variant X1, mRNA	1150	75.71	1062	0	1639		XM_009410144.2	alpha-mannosidase 2 (LOC103990861), mRNA	1172	73.79	1057	0	1628		XM_008660766.2	uncharacterized LOC100502340 (LOC100502340), transcript variant X1, mRNA	1183	72.14	1059	0	1583		XM_004232214.3	alpha-mannosidase 2 (LOC101266287), mRNA	1151	71.48	1073	0	1596		XM_010662698.2	alpha-mannosidase 2 (LOC100243903), transcript variant X1, mRNA	1153	75.14	1102	0	1722		XM_007217632.2	alpha-mannosidase 2 (LOC18782416), mRNA	1163	74.53	1107	0	1691
	UN000718	XM_011628260.1	uncharacterized LOC105421312 (LOC105421312), mRNA	315	41.07	375	4e-91	284		XM_009419960.1	uncharacterized LOC103998478 (LOC103998478), mRNA	1380	25.69	362	5e-23	105		XM_020550882.1	uncharacterized LOC109945085 (LOC109945085), partial mRNA	1221	44.13	596	2e-166	507		XM_010317443.1	uncharacterized LOC101248530 (LOC101248530), mRNA	1257	41.97	386	1e-81	280		XM_019217048.1	transposon Ty3-G Gag-Pol polyprotein (LOC104877707), mRNA	530	49.64	415	5e-142	423		XM_020568883.1	uncharacterized LOC109950324 (LOC109950324), mRNA	1772	29.76	662	7e-65	231
	UN000719	---	---	0	---	---	---	---		---	---	0	---	---	---	---		---	---	0	---	---	---	---		XM_004243030.1	uncharacterized LOC101256988 (LOC101256988), mRNA	1128	30.51	118	5e-08	50.4		---	---	0	---	---	---	---		---	---	0	---	---	---	---
	UN000721	XM_020669876.1	serine/threonine-protein kinase TIO (LOC18438212), transcript variant X2, mRNA	1340	61.4	1360	0	1578		XM_009391338.2	serine/threonine-protein kinase TIO (LOC103976137), transcript variant X4, mRNA	1344	61.23	1349	0	1572		XM_008676326.2	serine/threonine-protein kinase TIO (LOC103650755), mRNA	1378	59.47	1352	0	1511		XM_010319968.2	serine/threonine-protein kinase TIO (LOC101261501), transcript variant X1, mRNA	1320	61.02	1357	0	1579		XM_010663830.2	serine/threonine-protein kinase TIO (LOC100257868), mRNA	1365	67.08	1361	0	1738		XM_020558240.1	serine/threonine-protein kinase TIO (LOC18786888), transcript variant X2, mRNA	1349	65.71	1359	0	1726
	UN000722	XM_020661485.1	uncharacterized LOC18421549 (LOC18421549), transcript variant X2, mRNA	1325	42.04	1256	0	803		XM_009422412.2	uncharacterized LOC104000382 (LOC104000382), transcript variant X4, mRNA	1261	46.29	633	6e-147	475		NM_001174323.1	NM_001174323.1 length 629 aa, 1890 bp, from 19..1908 of NM_001174323.1 Zea mays Spc97 / Spc98 family of spindle pole body (SBP) component (LOC100381487), mRNA	629	45.91	514	3e-128	407		XM_010315165.1	uncharacterized LOC101258919 (LOC101258919), mRNA	1221	47.98	519	2e-141	459		XM_010654651.2	uncharacterized LOC100255993 (LOC100255993), mRNA	1249	48.08	1223	0	926		XM_007208357.2	uncharacterized LOC18773738 (LOC18773738), mRNA	1248	45.94	1243	0	908
	UN000723	XM_020675704.1	uncharacterized LOC18447695 (LOC18447695), transcript variant X4, mRNA	1167	53.51	1155	0	1149		XM_009384024.2	uncharacterized LOC103970302 (LOC103970302), transcript variant X1, mRNA	1130	49.17	1149	0	1035		XM_020548182.1	hypothetical protein (LOC103646065), transcript variant X2, mRNA	1189	45.49	1119	0	868		XM_010327122.2	uncharacterized LOC101264749 (LOC101264749), transcript variant X1, mRNA	1140	47.09	1153	0	968		XM_002276588.4	uncharacterized LOC100259829 (LOC100259829), transcript variant X1, mRNA	1141	53.22	1148	0	1149		XM_020564380.1	uncharacterized LOC18776106 (LOC18776106), transcript variant X1, mRNA	1200	51.84	1142	0	1092
	UN000724	XM_006847677.3	uncharacterized LOC18437469 (LOC18437469), transcript variant X2, mRNA	1580	35.39	551	4e-67	249		XM_009394504.2	uncharacterized LOC103978646 (LOC103978646), transcript variant X7, mRNA	1592	32.55	1324	6e-124	421		XM_008660420.2	RING/FYVE/PHD zinc finger superfamily protein (LOC103637710), mRNA	1524	51.55	161	1e-47	187		XM_019212986.1	uncharacterized LOC101244850 (LOC101244850), transcript variant X11, mRNA	1381	34.34	795	3e-94	332		XM_002270271.4	uncharacterized LOC100261463 (LOC100261463), transcript variant X4, mRNA	1581	36.08	1325	5e-163	528		XM_020556159.1	uncharacterized LOC18787726 (LOC18787726), transcript variant X2, mRNA	1581	37.73	819	1e-111	385
	UN000727	XM_006837340.3	protein transport protein SEC31 homolog B (LOC18428304), transcript variant X1, mRNA	1155	65.69	1166	0	1391		XM_009388577.2	protein transport protein SEC31 homolog B-like (LOC103973905), transcript variant X1, mRNA	1131	62.36	1161	0	1344		XM_008669605.2	Protein transport protein SEC31 homolog B (TIDP2729), transcript variant X1, mRNA	1128	56.07	1195	0	1191		XM_004229629.3	protein transport protein SEC31 homolog B (LOC101261454), mRNA	1124	60.75	1167	0	1295		XM_002272254.3	protein transport protein SEC31 homolog B (LOC100263684), transcript variant X2, mRNA	1125	65.49	1162	0	1410		XM_020556396.1	protein transport protein SEC31 homolog B (LOC18786680), mRNA	1134	62.96	1161	0	1373
	UN000730	XM_006849706.3	protein CROWDED NUCLEI 1 (LOC18439542), mRNA	1290	43.85	1131	0	619		XM_009385522.2	protein CROWDED NUCLEI 1 (LOC103971497), mRNA	1262	43.45	1114	0	669		XM_008680800.2	protein CROWDED NUCLEI 1 (LOC103653975), transcript variant X1, mRNA	1157	36.43	1109	7e-155	491		XM_004234639.3	protein CROWDED NUCLEI 1-like (LOC101255471), transcript variant X1, mRNA	1169	43.27	1084	0	649		XM_010649745.2	protein CROWDED NUCLEI 1 (LOC100242259), transcript variant X1, mRNA	1233	51.31	1109	0	836		XM_020560887.1	protein CROWDED NUCLEI 1 (LOC18784255), mRNA	1206	47.57	1110	0	765
	UN000731	XM_020665905.1	protein GIGANTEA (LOC18432036), transcript variant X1, mRNA	1181	78.13	1175	0	1654		XM_009382875.2	protein GIGANTEA (LOC103969371), mRNA	1189	75.81	1174	0	1582		NM_001301657.1	NM_001301657.1 length 1162 aa, 3489 bp, from 404..3892 of NM_001301657.1 Zea mays gigantea like1a (gigz1a), mRNA	1162	75.26	1176	0	1575		XM_004237784.3	protein GIGANTEA (LOC101255788), mRNA	1167	74.42	1173	0	1575		XM_010666759.2	protein GIGANTEA (LOC100254197), transcript variant X1, mRNA	1178	78.47	1175	0	1644		XM_007199626.2	protein GIGANTEA (LOC18768028), transcript variant X1, mRNA	1176	76.81	1173	0	1630
	UN000733	XM_020672527.1	kinesin-like protein KIN-4C (LOC18442659), mRNA	1249	73.16	898	0	1275		XM_009403046.2	kinesin-like protein KIN-4C (LOC103985375), transcript variant X1, mRNA	1296	61.81	1317	0	1412		XM_020538690.1	kinesin-like protein KIN-4C (LOC103627710), mRNA	1261	56.26	1310	0	1187		XM_010321908.2	kinesin-like protein KIN-4C (LOC101246423), transcript variant X1, mRNA	1230	70.46	1019	0	1318		XM_019216570.1	kinesin-like protein KIN-4C (LOC100247280), transcript variant X1, mRNA	1256	64.72	1304	0	1561		XM_020560397.1	kinesin-like protein KIN-4C (LOC18789391), transcript variant X1, mRNA	1273	73.02	986	0	1388
	UN000735	XM_006848360.3	uncharacterized LOC18438171 (LOC18438171), transcript variant X1, mRNA	1280	70.58	1149	0	1537		XM_009416192.2	uncharacterized LOC103995579 (LOC103995579), transcript variant X1, mRNA	1252	62.41	1144	0	1328		XM_008679675.2	AAA-type ATPase family protein (LOC103652718), transcript variant X1, mRNA	1233	58.72	1158	0	1215		XM_010320772.2	uncharacterized LOC101246524 (LOC101246524), transcript variant X1, mRNA	1195	63.09	1146	0	1335		XM_002279890.4	uncharacterized LOC100266414 (LOC100266414), transcript variant X1, mRNA	1247	69.82	1143	0	1512		XM_020564685.1	uncharacterized LOC18778019 (LOC18778019), transcript variant X1, mRNA	1238	67.98	1143	0	1436
	UN000737	XM_011626960.2	uncharacterized LOC105421050 (LOC105421050), transcript variant X1, mRNA	1282	61.31	1282	0	1357		XM_009392589.2	uncharacterized LOC103977151 (LOC103977151), mRNA	1130	61.13	1181	0	1305		XM_008646334.2	Protein kinase superfamily protein (LOC103625933), mRNA	1104	57.78	1196	0	1180		XM_004235330.3	protein kinase domain-containing protein (LOC101252371), transcript variant X1, mRNA	1188	63.74	1197	0	1370		XM_010650605.1	uncharacterized LOC100255903 (LOC100255903), transcript variant X5, mRNA	1182	67.45	1195	0	1446		XM_007210360.2	uncharacterized LOC18777086 (LOC18777086), mRNA	1198	67.28	1198	0	1498
	UN000738	XM_006854004.3	uncharacterized LOC18443823 (LOC18443823), mRNA	591	31.62	604	5e-77	264		XM_009383760.2	uncharacterized LOC103970110 (LOC103970110), transcript variant X1, mRNA	1054	50.21	239	1e-75	270		NM_001347051.1	NM_001347051.1 length 947 aa, 2844 bp, from 478..3321 of NM_001347051.1 Zea mays DNAJ heat shock N-terminal domain-containing protein (LOC103650196), mRNA	947	37.63	683	3e-131	421		XM_004229250.3	uncharacterized LOC101248043 (LOC101248043), mRNA	903	38.25	651	2e-129	414		XM_002266532.4	uncharacterized LOC100255461 (LOC100255461), transcript variant X1, mRNA	1175	37.7	703	5e-129	421		XM_020566154.1	uncharacterized LOC18772858 (LOC18772858), transcript variant X1, mRNA	1115	35.29	717	1e-113	377
	UN000742	XM_020668878.1	DNA polymerase alpha catalytic subunit (LOC18436827), transcript variant X1, mRNA	1553	66.78	1433	0	1828		XM_009395143.2	DNA polymerase alpha catalytic subunit (LOC103979106), mRNA	1549	72.64	1418	0	2003		XM_008673971.2	uncharacterized LOC100194009 (LOC100194009), transcript variant X1, mRNA	1522	66.71	1415	0	1826		NM_001279235.2	NM_001279235.2 length 1561 aa, 4686 bp, from 104..4789 of NM_001279235.2 Solanum lycopersicum DNA polymerase alpha catalytic subunit (DNApolalpha), mRNA	1561	70.06	1426	0	1956		XM_010654504.2	DNA polymerase alpha catalytic subunit (LOC100250805), mRNA	1559	73.62	1433	0	2033		XM_007204624.2	DNA polymerase alpha catalytic subunit (LOC18771587), mRNA	1537	72.26	1413	0	1996
	UN000743	XM_011622127.2	alpha-L-arabinofuranosidase 1 (LOC18426249), transcript variant X3, mRNA	678	68.17	666	0	943		XM_009415685.2	alpha-L-arabinofuranosidase 1 (LOC103995161), mRNA	741	72.05	662	0	981		NM_001350094.1	NM_001350094.1 length 656 aa, 1971 bp, from 277..2247 of NM_001350094.1 Zea mays alpha-L-arabinofuranosidase 1 (LOC100193890), mRNA	656	67.07	659	0	921		NM_001246996.2	NM_001246996.2 length 674 aa, 2025 bp, from 354..2378 of NM_001246996.2 Solanum lycopersicum alpha-L-arabinofuranosidase (ARF1), mRNA	674	68.09	655	0	938		XM_002283939.3	alpha-L-arabinofuranosidase 1 (LOC100258574), mRNA	683	63.81	666	0	859		XM_007203714.2	alpha-L-arabinofuranosidase 1 (LOC18770622), transcript variant X1, mRNA	677	72.27	649	0	980
	UN000744	XM_011628200.2	4-alpha-glucanotransferase DPE2 (LOC18442847), transcript variant X1, mRNA	968	73.21	963	0	1484		XM_009393284.2	4-alpha-glucanotransferase DPE2 (LOC103977700), transcript variant X1, mRNA	960	73.71	970	0	1507		XM_020540324.1	uncharacterized LOC100194185 (pco061836), transcript variant X2, mRNA	952	74.33	927	0	1491		XM_010317286.2	4-alpha-glucanotransferase DPE2 (LOC101253841), mRNA	979	72.3	917	0	1422		XM_002278293.4	4-alpha-glucanotransferase DPE2 (LOC100267188), transcript variant X1, mRNA	965	73.46	972	0	1481		XM_020567923.1	4-alpha-glucanotransferase DPE2 (LOC18769381), mRNA	972	75.39	971	0	1549
	UN000746	XM_006857239.3	cell division cycle 5-like protein (LOC18447137), mRNA	1085	80.53	827	0	1246		XM_009420322.2	cell division cycle 5-like protein (LOC103998753), mRNA	1120	83.54	826	0	1318		NM_001111616.1	NM_001111616.1 length 925 aa, 2778 bp, from 151..2928 of NM_001111616.1 Zea mays myb2 (myb2), mRNA	925	78.76	824	0	1213		NM_001247800.2	NM_001247800.2 length 987 aa, 2964 bp, from 209..3172 of NM_001247800.2 Solanum lycopersicum CDC5-like protein (cdc5), mRNA	987	79.39	825	0	1211		XM_010661925.2	cell division cycle 5-like protein (LOC100243262), mRNA	1012	85.73	827	0	1336		XM_007208317.2	cell division cycle 5-like protein (LOC18772640), mRNA	1014	81.17	823	0	1237
	UN000747	XM_020671652.1	uncharacterized LOC18441417 (LOC18441417), transcript variant X1, mRNA	1191	36.15	343	5e-10	64.3		---	---	0	---	---	---	---		---	---	0	---	---	---	---		---	---	0	---	---	---	---		XM_010655739.2	polyadenylation and cleavage factor homolog 4 (LOC100251089), mRNA	1086	41.37	278	3e-10	65.1		---	---	0	---	---	---	---
	UN000748	XM_020668958.1	trichohyalin (LOC18437024), transcript variant X4, mRNA	1477	53.33	45	7e-07	53.9		XM_009412580.2	paramyosin (LOC103992746), transcript variant X1, mRNA	1071	25.6	918	2e-22	105		---	---	0	---	---	---	---		XM_004246055.3	myosin-4-like (LOC101256404), mRNA	1341	27.58	747	4e-36	149		XM_019226111.1	golgin subfamily B member 1 (LOC100255355), mRNA	1972	28.43	781	1e-39	161		XM_020564440.1	interaptin (LOC18777848), partial mRNA	1038	27.77	1109	3e-50	194
	UN000750	XM_006853645.3	receptor-like protein kinase HSL1 (LOC18443456), mRNA	1038	50.48	937	0	826		XM_009418197.2	receptor-like protein kinase HSL1 (LOC103997063), mRNA	1014	55.2	942	0	897		XM_008647400.2	receptor-like protein kinase 5 (LOC103627070), mRNA	1036	47.05	931	0	746		XM_004245095.3	receptor-like protein kinase HSL1 (LOC101247544), mRNA	1043	55.86	938	0	979		XM_002280359.3	receptor-like protein kinase 5 (LOC100247568), mRNA	1021	57.14	945	0	947		XM_020564355.1	receptor-like protein kinase HSL1 (LOC18790847), mRNA	1049	58.32	943	0	1004
	UN000756	XM_020662621.1	putative E3 ubiquitin-protein ligase LIN (LOC18426665), transcript variant X2, mRNA	1456	56.72	1079	0	1113		XM_009382290.2	putative E3 ubiquitin-protein ligase LIN (LOC103968928), mRNA	1335	55.98	1354	0	1355		XM_020551221.1	putative E3 ubiquitin-protein ligase LIN (LOC103651710), mRNA	1230	49.52	1242	0	1050		XM_010325114.2	putative E3 ubiquitin-protein ligase LIN-1 (LOC101248590), transcript variant X1, mRNA	1039	59.43	1045	0	1163		XM_010657995.2	putative E3 ubiquitin-protein ligase LIN-1 (LOC100242430), transcript variant X1, mRNA	1365	65.95	1342	0	1524		XM_020569354.1	putative E3 ubiquitin-protein ligase LIN (LOC18771534), mRNA	1344	61.35	1348	0	1470
	UN000757	XM_006828386.3	NF-X1-type zinc finger protein NFXL1 (LOC18423789), mRNA	1285	61.7	1073	0	1211		XM_009410971.2	NF-X1-type zinc finger protein NFXL1 (LOC103991490), mRNA	1119	68.77	999	0	1308		XM_008651086.2	NF-X1-type zinc finger protein NFXL1 (LOC103629990), mRNA	1133	61.44	1001	0	1164		XM_004235708.3	NF-X1-type zinc finger protein NFXL1 (LOC101265525), mRNA	1146	61.33	1112	0	1269		XM_019226388.1	NF-X1-type zinc finger protein NFXL1 (LOC100268010), mRNA	1899	68.09	1103	0	1414		XM_007210851.2	NF-X1-type zinc finger protein NFXL1 (LOC18776159), mRNA	1133	65.24	1099	0	1360
	UN000758	XM_011626960.2	uncharacterized LOC105421050 (LOC105421050), transcript variant X1, mRNA	1282	58.68	1285	0	1268		XM_009392062.2	uncharacterized LOC103976747 (LOC103976747), transcript variant X1, mRNA	1125	59.59	1178	0	1166		XM_008646334.2	Protein kinase superfamily protein (LOC103625933), mRNA	1104	55.16	1191	0	1077		XM_004235330.3	protein kinase domain-containing protein (LOC101252371), transcript variant X1, mRNA	1188	62.65	1202	0	1258		XM_010650589.1	uncharacterized LOC100255903 (LOC100255903), transcript variant X1, mRNA	1169	65.08	1194	0	1330		XM_007210360.2	uncharacterized LOC18777086 (LOC18777086), mRNA	1198	64.8	1196	0	1370
	UN000759	XM_006846367.3	uncharacterized LOC18436345 (LOC18436345), mRNA	1143	32.51	283	3e-22	103		XM_009397161.2	uncharacterized LOC103980696 (LOC103980696), transcript variant X1, mRNA	1005	25.75	598	7e-16	83.2		---	---	0	---	---	---	---		XM_004234982.3	uncharacterized LOC101252062 (LOC101252062), transcript variant X1, mRNA	1175	29.35	201	3e-16	84.3		XM_010664635.2	uncharacterized LOC100853355 (LOC100853355), transcript variant X1, mRNA	1168	26.24	968	3e-51	196		XM_007220523.2	uncharacterized LOC18786134 (LOC18786134), mRNA	1312	24.71	518	2e-20	97.8
	UN000760	XM_011629150.2	uncharacterized LOC18423670 (LOC18423670), transcript variant X1, mRNA	1037	40.2	408	8e-68	244		XM_018819859.1	uncharacterized LOC104000119 (LOC104000119), transcript variant X6, mRNA	893	43.33	420	4e-73	258		XM_008671742.2	uncharacterized LOC103647171 (LOC103647171), transcript variant X5, mRNA	1016	59.06	127	1e-36	149		XM_010315226.2	uncharacterized LOC101252746 (LOC101252746), transcript variant X2, mRNA	1020	39.91	456	3e-71	254		XM_002281859.4	general negative regulator of transcription subunit 4 (LOC100267264), transcript variant X1, mRNA	1027	39.22	923	6e-165	508		XM_020566623.1	uncharacterized LOC18775447 (LOC18775447), transcript variant X1, mRNA	1069	40.23	937	1e-160	497
	UN000762	XM_006851826.3	nonsense transcripts UPF2 (LOC18441596), transcript variant X2, mRNA	1215	74.51	1165	0	1619		XM_009412024.2	regulator of nonsense transcripts UPF2 (LOC103992360), transcript variant X1, mRNA	1192	74.26	1181	0	1654		XM_008678401.2	Regulator of nonsense transcripts UPF2 (si687055e04b), transcript variant X1, mRNA	1197	73.27	707	0	1000		XM_010321546.2	regulator of nonsense transcripts UPF2 (LOC101253276), transcript variant X1, mRNA	1198	78.86	700	0	1063		XM_010660161.2	regulator of nonsense transcripts UPF2 (LOC100258101), transcript variant X2, mRNA	1200	81.64	1171	0	1753		XM_020556751.1	regulator of nonsense transcripts UPF2 (LOC18787405), transcript variant X2, mRNA	1190	76.56	1169	0	1706
	UN000764	XM_020666947.1	DNA topoisomerase 1 (LOC18433959), transcript variant X1, mRNA	1185	67.4	822	0	1155		XM_009421689.2	DNA topoisomerase 1 (LOC103999822), mRNA	1110	70.39	824	0	1176		XM_008661232.2	DNA topoisomerase 1 (LOC103638270), transcript variant X2, mRNA	1111	65.16	821	0	1086		XM_004233717.3	DNA topoisomerase 1 (LOC101248941), transcript variant X2, mRNA	1173	70.4	821	0	1197		XM_002280924.4	DNA topoisomerase 1 (LOC100247441), transcript variant X1, mRNA	1185	74.42	825	0	1243		XM_020554384.1	DNA topoisomerase 1 (LOC18789073), mRNA	1184	70.16	821	0	1210
	UN000765	XM_020675048.1	histidine kinase 1 (LOC18446584), transcript variant X3, mRNA	1380	73.93	583	0	769		XM_009395742.1	probable histidine kinase 2 (LOC103979568), mRNA	1059	24.65	426	2e-19	93.6		NM_001112388.2	NM_001112388.2 length 997 aa, 2994 bp, from 12..3005 of NM_001112388.2 Zea mays histidine kinase4 (gpm791), mRNA	997	34.78	138	9e-10	62.8		XM_004233694.3	histidine kinase 1 (LOC101265097), mRNA	1242	75.77	549	0	739		XM_019219629.1	histidine kinase 1 (LOC100247100), transcript variant X1, mRNA	1271	75.38	585	0	781		XM_007201864.2	histidine kinase 1 (LOC18770717), mRNA	1242	75.21	585	0	785
	UN000766	XM_020673649.1	pentatricopeptide repeat-containing protein At2g19280-like (LOC110008113), transcript variant X1, mRNA	696	46.1	666	0	559		XM_018829501.1	pentatricopeptide repeat-containing protein At2g19280-like (LOC103981410), transcript variant X1, mRNA	713	46.9	693	0	566		XM_008653166.2	pentatricopeptide repeat-containing protein (LOC103631761), transcript variant X2, mRNA	650	32.35	439	3e-74	252		XM_004237533.3	pentatricopeptide repeat-containing protein At5g01110 (LOC101246240), mRNA	738	30.02	463	3e-73	251		XM_010661179.2	pentatricopeptide repeat-containing protein At2g19280 (LOC100260220), transcript variant X1, mRNA	715	48.23	678	0	594		XM_020556194.1	pentatricopeptide repeat-containing protein At2g19280 (LOC18786868), transcript variant X2, mRNA	734	48.03	608	0	555
	UN000767	XM_020667154.1	DNA ligase 6 (LOC18433807), partial mRNA	1461	59.05	1414	0	1639		XM_009396814.2	DNA ligase 6 (LOC103980411), transcript variant X1, mRNA	1389	63.52	1354	0	1702		XM_008676957.2	DNA ligase 6 (LOC103651343), transcript variant X1, mRNA	1397	56.68	1355	0	1528		XM_004233575.3	DNA ligase 6 (LOC101249429), transcript variant X1, mRNA	1441	60.33	1399	0	1629		XM_002266132.4	DNA ligase 6 (LOC100266816), transcript variant X1, mRNA	1449	65.45	1375	0	1783		XM_020559186.1	DNA ligase 6 (LOC18781757), transcript variant X1, mRNA	1378	63.3	1365	0	1712
	UN000768	XM_020668496.1	serine/threonine-protein kinase minibrain (LOC18422714), transcript variant X1, mRNA	965	58.02	972	0	976		XM_009414925.2	uncharacterized LOC103994562 (LOC103994562), transcript variant X1, mRNA	962	58.39	971	0	1018		XM_008669999.2	hypothetical protein (TIDP3424), transcript variant X2, mRNA	918	49.52	931	0	736		XM_010319999.2	serine/threonine-protein kinase minibrain (LOC101245740), transcript variant X1, mRNA	960	57.62	951	0	963		XM_002267876.3	serine/threonine-protein kinase minibrain (LOC100240775), transcript variant X1, mRNA	963	60.89	946	0	1065		XM_020556705.1	dual specificity protein kinase YAK1 (LOC18786910), transcript variant X1, mRNA	952	60.76	948	0	1060
	UN000769	XM_006850899.3	probable pre-mRNA-splicing factor ATP-dependent RNA helicase DEAH5 (LOC18440761), mRNA	1202	90.61	980	0	1761		XM_009382760.2	probable pre-mRNA-splicing factor ATP-dependent RNA helicase DEAH5 (LOC103969268), mRNA	1181	93.24	961	0	1782		NM_001326564.1	NM_001326564.1 length 1236 aa, 3711 bp, from 139..3849 of NM_001326564.1 Zea mays probable pre-mRNA-splicing factor ATP-dependent RNA helicase (LOC103626876), mRNA	1236	90.77	964	0	1724		XM_004243703.3	probable pre-mRNA-splicing factor ATP-dependent RNA helicase DEAH5 (LOC101267328), mRNA	1190	89.23	984	0	1745		XM_010654816.2	probable pre-mRNA-splicing factor ATP-dependent RNA helicase DEAH5 (LOC100241659), mRNA	1237	93.85	959	0	1800		XM_020556602.1	probable pre-mRNA-splicing factor ATP-dependent RNA helicase DEAH5 (LOC18781019), mRNA	1195	92.44	966	0	1781
	UN000770	XM_006849748.3	DIS3-like exonuclease 2 (LOC18439583), mRNA	1165	44.17	326	2e-64	238		XM_009404796.2	DIS3-like exonuclease 2 (LOC103986707), mRNA	1149	45.75	306	7e-58	218		XM_008681075.2	DIS3-like exonuclease 2 (LOC103654245), mRNA	1063	39.39	297	1e-35	147		XM_004250516.3	DIS3-like exonuclease 2 (LOC101253650), mRNA	1092	39.18	319	9e-52	198		XM_002284383.4	DIS3-like exonuclease 2 (LOC100260740), transcript variant X1, mRNA	1131	43.27	342	2e-62	232		XM_007226115.2	DIS3-like exonuclease 2 (LOC18792556), transcript variant X1, mRNA	1136	40.53	338	1e-58	220
	UN000772	XM_011623746.2	uncharacterized LOC18422100 (LOC18422100), mRNA	1070	65.78	1049	0	1217		XM_009412113.2	uncharacterized LOC103992424 (LOC103992424), transcript variant X1, mRNA	1047	63.16	1045	0	1159		XM_020549698.1	uncharacterized LOC100280426 (TIDP3328), transcript variant X1, mRNA	1091	60.78	1058	0	1096		XM_004250861.3	uncharacterized LOC101265608 (LOC101265608), mRNA	1123	60.87	1086	0	1132		XM_010653890.2	uncharacterized LOC100250008 (LOC100250008), transcript variant X1, mRNA	1047	63.3	1041	0	1168		XM_007213654.2	E3 ubiquitin-protein ligase HERC2 (LOC18780614), mRNA	1108	60.15	1079	0	1134
	UN000773	XM_011627368.2	nodulin homeobox (LOC18440510), transcript variant X1, mRNA	1047	65.89	557	0	703		XM_018823511.1	nodulin homeobox (LOC103978982), transcript variant X4, mRNA	940	52.04	978	0	829		XM_008670253.2	Nodulin homeobox (LOC100384237), transcript variant X1, mRNA	925	44.03	972	0	644		XM_004247428.3	nodulin homeobox (LOC101264065), transcript variant X2, mRNA	949	46.88	992	0	730		XM_010653781.2	nodulin homeobox (LOC100259581), mRNA	962	55.04	983	0	956		XM_020570378.1	nodulin homeobox (LOC18766550), mRNA	976	50.15	987	0	825
	UN000774	XM_006844040.3	DNA-directed RNA polymerase 1B, mitochondrial (LOC18433964), mRNA	1006	72.17	1024	0	1446		XM_009396282.2	DNA-directed RNA polymerase 1B, mitochondrial-like (LOC103979998), mRNA	994	76.06	923	0	1436		NM_001111461.2	NM_001111461.2 length 975 aa, 2928 bp, from 258..3185 of NM_001111461.2 Zea mays RNA polymerase T phage-like 1 (rpot1), mRNA	975	79.88	845	0	1399		XM_004232079.3	DNA-directed RNA polymerase 2B, chloroplastic/mitochondrial (LOC101248533), mRNA	1026	77.31	899	0	1416		XM_002267428.3	DNA-directed RNA polymerase 1, mitochondrial (LOC100263361), mRNA	980	81.1	905	0	1489		XM_007225321.2	DNA-directed RNA polymerase 1, mitochondrial (LOC18792046), mRNA	1028	73.19	992	0	1419
	UN000776	XM_011623169.2	serine/threonine-protein kinase PRP4 homolog (LOC18429061), transcript variant X21, mRNA	1140	74.83	572	0	843		XM_009409966.2	serine/threonine-protein kinase prpf4B (LOC103990710), transcript variant X8, mRNA	1080	73.08	561	0	828		XM_020539417.1	Protein kinase superfamily protein (LOC100502407), transcript variant X9, mRNA	861	68.01	569	0	786		XM_004239370.3	serine/threonine-protein kinase prpf4B (LOC101246632), transcript variant X4, mRNA	1005	76.48	506	0	810		XM_010649482.2	serine/threonine-protein kinase prpf4B (LOC100247382), transcript variant X2, mRNA	1090	73.36	578	0	882		XM_007227298.2	serine/threonine-protein kinase prpf4B (LOC18790255), transcript variant X4, mRNA	1047	69.19	581	0	817
	UN000777	XM_006840407.3	DEAD-box ATP-dependent RNA helicase 24 (LOC18430248), mRNA	781	79.03	782	0	1092		XM_009405432.2	DEAD-box ATP-dependent RNA helicase 24 (LOC103987199), mRNA	768	79.51	776	0	1143		NM_001154124.1	NM_001154124.1 length 777 aa, 2334 bp, from 73..2406 of NM_001154124.1 Zea mays pre-mRNA-processing ATP-dependent RNA helicase prp-5 (LOC100281205), mRNA	777	71.57	788	0	998		XM_004229333.3	DEAD-box ATP-dependent RNA helicase 24 (LOC101264757), transcript variant X1, mRNA	779	73.95	787	0	1083		XM_002277383.3	DEAD-box ATP-dependent RNA helicase 24 (LOC100241725), transcript variant X1, mRNA	777	80.46	778	0	1150		XM_007221403.2	DEAD-box ATP-dependent RNA helicase 24 (LOC18788106), transcript variant X1, mRNA	783	77.71	785	0	1120
	UN000778	XM_011623614.2	isoleucine--tRNA ligase, chloroplastic/mitochondrial (LOC18430296), transcript variant X1, mRNA	1089	73.69	1072	0	1658		XM_009415838.2	isoleucine--tRNA ligase, chloroplastic/mitochondrial (LOC103995284), transcript variant X1, mRNA	1059	72.82	1078	0	1614		XM_020553205.1	uncharacterized LOC100275420 (LOC100275420), transcript variant X1, mRNA	1090	71.39	1017	0	1555		XM_004229454.3	isoleucine--tRNA ligase, chloroplastic/mitochondrial (LOC101249760), mRNA	1110	72.44	1063	0	1610		XM_010651446.2	isoleucine--tRNA ligase, chloroplastic/mitochondrial (LOC100254604), transcript variant X2, mRNA	1093	77.86	1075	0	1709		XM_020570111.1	isoleucine--tRNA ligase, chloroplastic/mitochondrial (LOC18790727), mRNA	1092	74.88	1075	0	1639
	UN000779	XM_006843943.3	DExH-box ATP-dependent RNA helicase DExH3 (LOC18433864), transcript variant X2, mRNA	1200	76.85	1123	0	1659		XM_009395322.2	DExH-box ATP-dependent RNA helicase DExH3 (LOC103979246), mRNA	1215	75.93	1126	0	1649		XM_008675571.2	DExH-box ATP-dependent RNA helicase DExH3 (LOC103649879), mRNA	1333	76.97	1081	0	1612		XM_004235701.3	DExH-box ATP-dependent RNA helicase DExH3 (LOC101263393), mRNA	1201	74.64	1053	0	1569		XM_002277589.4	DExH-box ATP-dependent RNA helicase DExH3 (LOC100244105), transcript variant X1, mRNA	1194	76.83	1122	0	1675		XM_007209009.2	DExH-box ATP-dependent RNA helicase DExH3 (LOC18776712), mRNA	1265	74.93	1133	0	1635
	UN000781	XM_006849899.3	trafficking protein particle complex subunit 11 (LOC18439741), transcript variant X4, mRNA	1186	60.05	1184	0	1410		XM_009403068.2	trafficking protein particle complex subunit 11 (LOC103985393), transcript variant X1, mRNA	1182	61.01	1185	0	1433		XM_020538673.1	trafficking protein particle complex subunit 11-like (LOC109940000), mRNA	738	57.28	721	0	811		XM_004232543.3	trafficking protein particle complex subunit 11 (LOC101267189), transcript variant X1, mRNA	1176	60.87	1196	0	1436		XM_002265665.4	trafficking protein particle complex subunit 11 (LOC100265343), mRNA	1190	62.88	1180	0	1498		XM_020568348.1	trafficking protein particle complex subunit 11 (LOC18771864), mRNA	1190	59.7	1186	0	1415
	UN000782	XM_011629143.2	uncharacterized LOC18445318 (LOC18445318), transcript variant X2, mRNA	1299	59.24	314	4e-104	353		XM_009394944.2	titin-like (LOC103978969), transcript variant X4, mRNA	1110	49.11	393	1e-99	338		XM_020542455.1	uncharacterized LOC109939321 (LOC109939321), mRNA	339	47.5	200	3e-46	170		XM_004230171.3	uncharacterized LOC101248143 (LOC101248143), mRNA	1011	54.86	288	2e-90	311		XM_019220134.1	uncharacterized LOC104879232 (LOC104879232), transcript variant X1, mRNA	1046	34.65	987	2e-129	418		XM_020565485.1	uncharacterized LOC18775569 (LOC18775569), mRNA	1267	43.72	988	0	625
	UN000783	XM_006827592.3	tripeptidyl-peptidase 2 (LOC18423030), transcript variant X1, mRNA	1354	74.83	1307	0	1971		XM_009384091.2	tripeptidyl-peptidase 2 (LOC103970347), mRNA	1369	74.56	1305	0	1988		XM_008647816.2	tripeptidyl-peptidase 2 (LOC103627523), transcript variant X2, mRNA	1359	70.83	1296	0	1907		XM_019212602.1	tripeptidyl-peptidase 2 (LOC101244555), mRNA	932	65.48	704	0	888		XM_010664435.2	tripeptidyl-peptidase 2 (LOC100248019), transcript variant X1, mRNA	1370	76.76	1308	0	2061		XM_007220241.2	tripeptidyl-peptidase 2 (LOC18787294), mRNA	1390	75.79	1301	0	2021
	UN000784	XM_011625015.2	uncharacterized LOC18433947 (LOC18433947), mRNA	796	41.9	389	2e-63	226		XM_009393487.2	bromodomain adjacent to zinc finger domain protein 1A-like (LOC103977850), transcript variant X1, mRNA	747	38.06	775	4e-117	369		NM_001157994.1	NM_001157994.1 length 733 aa, 2202 bp, from 63..2264 of NM_001157994.1 Zea mays PHD-finger family protein (LOC100285099), mRNA	733	49.25	201	5e-44	169		XM_004241568.3	uncharacterized LOC101264529 (LOC101264529), mRNA	652	35.61	702	4e-100	321		XM_002273266.4	autophagy-related protein 36 (LOC100266325), mRNA	648	40.91	726	5e-131	402		XM_007208652.2	eukaryotic translation initiation factor 5B (LOC18772812), transcript variant X1, mRNA	828	54.34	173	5e-42	164
	UN000786	XM_006847095.3	DNA polymerase delta catalytic subunit (LOC18436873), mRNA	1081	87.45	1020	0	1832		XM_009392489.2	DNA polymerase delta catalytic subunit (LOC103977078), transcript variant X1, mRNA	1127	87.45	1020	0	1839		XM_008681422.2	DNA polymerase delta catalytic subunit (LOC103654581), mRNA	1103	85.71	1043	0	1823		XM_004249301.3	DNA polymerase delta catalytic subunit (LOC101256637), mRNA	1086	85.37	1039	0	1818		XM_002264349.3	DNA polymerase delta catalytic subunit (LOC100246530), transcript variant X1, mRNA	1089	88.77	1042	0	1859		XM_020562142.1	DNA polymerase delta catalytic subunit (LOC18779621), mRNA	1095	87.39	1039	0	1831
	UN000787	XM_006838887.3	ETO1-like protein 1 (LOC18429603), mRNA	942	75.59	893	0	1346		XM_009400282.2	ETO1-like protein 1 (LOC103983113), mRNA	925	77.89	891	0	1396		XM_008670297.2	ETO1-like protein 1 (LOC100501097), transcript variant X1, mRNA	1085	70.25	894	0	1244		NM_001247246.2	NM_001247246.2 length 915 aa, 2748 bp, from 675..3422 of NM_001247246.2 Solanum lycopersicum ethylene-overproducer1-like protein (EOL1), mRNA	915	74.3	891	0	1327		XM_002280483.4	ETO1-like protein 1 (LOC100266551), mRNA	904	79.24	891	0	1419		XM_007201691.2	ETO1-like protein 1 (LOC18767724), transcript variant X1, mRNA	909	77.47	892	0	1382
	UN000788	XM_011622525.2	probable lysine-specific demethylase JMJ14 (LOC18427288), transcript variant X1, mRNA	1191	63.09	718	0	845		XM_009407095.2	lysine-specific demethylase JMJ15 (LOC103988539), transcript variant X3, mRNA	1249	52.17	1221	0	1087		XM_008649924.2	Putative lysine-specific demethylase JMJ16 (LOC100383891), transcript variant X1, mRNA	1260	44.5	1227	0	884		XM_004236736.3	putative lysine-specific demethylase JMJ16 (LOC101246913), transcript variant X1, mRNA	1191	59.97	642	0	743		XM_010657558.2	lysine-specific demethylase JMJ18 (LOC100252938), transcript variant X2, mRNA	1119	53.69	1166	0	1088		XM_020562143.1	lysine-specific demethylase JMJ18 (LOC18778924), transcript variant X1, mRNA	1090	51.64	1191	0	1022
	UN000789	XM_011627267.2	uncharacterized LOC18440101 (LOC18440101), transcript variant X2, mRNA	1179	39.88	978	3e-110	373		XM_009405989.2	uncharacterized LOC103987635 (LOC103987635), transcript variant X1, mRNA	1194	38.33	994	3e-116	390		XM_008675947.2	uncharacterized LOC103650352 (LOC103650352), transcript variant X3, mRNA	1179	32.1	1000	9e-56	213		XM_004239456.3	uncharacterized LOC101256284 (LOC101256284), transcript variant X1, mRNA	1132	39.5	962	4e-115	385		XM_002266064.3	microtubule-associated protein futsch (LOC100244315), mRNA	1184	48.64	956	0	631		XM_020562809.1	uncharacterized LOC18792788 (LOC18792788), transcript variant X2, mRNA	1191	43.69	966	2e-159	506
	UN000791	XM_006855807.3	protein FORGETTER 1 (LOC18445672), mRNA	1236	75.45	1226	0	1855		XM_009415315.2	protein strawberry notch (LOC103994866), transcript variant X2, mRNA	1259	78.19	1229	0	1912		XM_020545214.1	uncharacterized LOC100502351 (LOC100502351), transcript variant X1, mRNA	1321	67.22	1275	0	1676		XM_004248238.3	protein strawberry notch (LOC101248817), transcript variant X1, mRNA	1291	76.22	1228	0	1890		XM_003634768.3	protein strawberry notch (LOC100267281), transcript variant X1, mRNA	1250	80.44	1227	0	1961		XM_020563110.1	protein FORGETTER 1 (LOC18778728), transcript variant X1, mRNA	1258	75.86	1247	0	1860
	UN000795	XM_011630128.2	polyadenylation and cleavage factor homolog 4 (LOC18447904), transcript variant X1, mRNA	1054	48.77	1019	0	783		XM_009400940.2	polyadenylation and cleavage factor homolog 4-like (LOC103983681), transcript variant X1, mRNA	1039	45.82	1017	0	748		XM_008663624.2	uncharacterized LOC100280286 (LOC100280286), transcript variant X2, mRNA	959	38.54	1012	6e-176	538		XM_004253083.3	polyadenylation and cleavage factor homolog 4 (LOC101252266), transcript variant X4, mRNA	975	43.3	1000	0	650		XM_010657055.2	polyadenylation and cleavage factor homolog 4 (LOC100255600), transcript variant X1, mRNA	1046	50.75	1005	0	837		XM_020561617.1	polyadenylation and cleavage factor homolog 4 (LOC18779372), transcript variant X1, mRNA	1017	45.67	1005	0	726
	UN000796	XM_006841982.3	WD repeat-containing protein 11 (LOC18431871), mRNA	1345	65.51	1270	0	1456		XM_009383359.2	WD repeat-containing protein 11 (LOC103969693), transcript variant X1, mRNA	1320	64.91	1268	0	1486		NM_001350703.1	NM_001350703.1 length 1299 aa, 3900 bp, from 117..4016 of NM_001350703.1 Zea mays Transducin family protein / WD-40 repeat family protein (pco087232), mRNA	1299	62.15	1263	0	1350		XM_010324995.2	WD repeat-containing protein 11 (LOC101245374), transcript variant X1, mRNA	1314	65.2	1253	0	1484		XM_010658140.2	WD repeat-containing protein 11 (LOC100256021), transcript variant X3, mRNA	1348	67.89	1258	0	1545		XM_020568544.1	WD repeat-containing protein 11 (LOC18769145), mRNA	1444	67.17	1258	0	1485
	UN000797	XM_006850216.3	importin beta-like SAD2 (LOC18440063), mRNA	1030	82.04	1030	0	1667		XM_009405345.2	importin beta-like SAD2 (LOC103987136), transcript variant X2, mRNA	1029	81.83	1029	0	1688		XM_020553071.1	uncharacterized LOC100193617 (LOC100193617), transcript variant X1, mRNA	1056	78.95	1026	0	1642		XM_004247948.2	importin beta-like SAD2 (LOC101260377), mRNA	1048	81.3	1032	0	1697		XM_002268012.3	importin beta-like SAD2 (LOC100259995), mRNA	1034	85.16	1031	0	1767		XM_007221532.2	importin beta-like SAD2 (LOC18791987), transcript variant X1, mRNA	1033	84.56	1030	0	1695
	UN000798	XM_020663087.1	uncharacterized mitochondrial protein AtMg00810-like (LOC110006679), mRNA	406	36.96	303	3e-59	198		XM_018819130.1	uncharacterized mitochondrial protein AtMg00810-like (LOC108951439), mRNA	353	37.83	230	2e-43	155		XM_020547113.1	uncharacterized LOC103644390 (LOC103644390), mRNA	1043	48.1	420	5e-123	382		XM_019214684.1	uncharacterized mitochondrial protein AtMg00810-like (LOC109120675), mRNA	363	45.18	363	9e-108	322		XM_019224862.1	uncharacterized LOC109123862 (LOC109123862), mRNA	1018	47.69	411	1e-128	395		XM_020568876.1	uncharacterized mitochondrial protein AtMg00810-like (LOC109950319), mRNA	398	49.67	306	4e-106	319
	UN000799	XM_011628206.2	exportin-7 (LOC18442853), transcript variant X8, mRNA	1062	85.09	1053	0	1865		XM_009404171.2	exportin-7-like (LOC103986231), transcript variant X1, mRNA	1068	82.31	1057	0	1811		XM_008650962.1	exportin-7-A (LOC103629871), transcript variant X1, mRNA	1056	75.59	1053	0	1656		XM_010321355.2	exportin-7-A (LOC101262148), transcript variant X1, mRNA	1052	73.96	1060	0	1589		XM_019217696.1	exportin-7 (LOC100254054), transcript variant X6, mRNA	1066	89.08	1053	0	1915		XM_020556187.1	exportin-7 (LOC18787388), transcript variant X1, mRNA	1052	86.99	1053	0	1899
	UN000800	XM_006843650.3	probable alpha,alpha-trehalose-phosphate synthase [UDP-forming] 7 (LOC18433566), mRNA	846	74.82	846	0	1282		XM_009418155.2	probable alpha,alpha-trehalose-phosphate synthase [UDP-forming] 7 (LOC103997029), transcript variant X1, mRNA	874	77.14	853	0	1341		NM_001301573.1	NM_001301573.1 length 912 aa, 2739 bp, from 190..2928 of NM_001301573.1 Zea mays probable alpha,alpha-trehalose-phosphate synthase [UDP-forming] 7 (LOC103636651), mRNA	912	71.46	876	0	1270		XM_004232987.2	probable alpha,alpha-trehalose-phosphate synthase [UDP-forming] 7 (LOC101245612), transcript variant X1, mRNA	851	80.73	851	0	1377		XM_002268138.3	probable alpha,alpha-trehalose-phosphate synthase [UDP-forming] 7 (LOC100265140), mRNA	853	83.86	849	0	1432		XM_007214557.2	probable alpha,alpha-trehalose-phosphate synthase [UDP-forming] 7 (LOC18780959), mRNA	854	83.47	847	0	1421
	UN000801	XM_011627267.2	uncharacterized LOC18440101 (LOC18440101), transcript variant X2, mRNA	1179	40.1	980	1e-109	371		XM_009405989.2	uncharacterized LOC103987635 (LOC103987635), transcript variant X1, mRNA	1194	38.23	994	3e-116	390		XM_008675947.2	uncharacterized LOC103650352 (LOC103650352), transcript variant X3, mRNA	1179	32.33	996	4e-57	217		XM_004239456.3	uncharacterized LOC101256284 (LOC101256284), transcript variant X1, mRNA	1132	39.73	959	6e-116	387		XM_002266064.3	microtubule-associated protein futsch (LOC100244315), mRNA	1184	48.54	956	0	624		XM_020562809.1	uncharacterized LOC18792788 (LOC18792788), transcript variant X2, mRNA	1191	43.63	965	7e-159	505
	UN000802	XM_006846959.3	ABC transporter B family member 9 (LOC18436737), transcript variant X1, mRNA	1279	75.2	1254	0	1777		XM_009387111.2	ABC transporter B family member 4 (LOC103972762), transcript variant X2, mRNA	1271	71.66	1256	0	1687		XM_008675733.2	ABC transporter B family member 21 (LOC103650065), transcript variant X1, mRNA	1329	65.6	1253	0	1540		XM_004233814.3	ABC transporter B family member 9-like (LOC101258034), mRNA	1265	68.78	1262	0	1667		XM_002271149.3	ABC transporter B family member 9 (LOC100253815), transcript variant X1, mRNA	1270	73.29	1254	0	1740		XM_007214500.2	ABC transporter B family member 9 (LOC18778564), transcript variant X1, mRNA	1272	69.37	1257	0	1654
	UN000803	XM_006837088.3	trafficking protein particle complex II-specific subunit 130 homolog (LOC18428049), transcript variant X1, mRNA	1267	76.18	1268	0	1955		XM_009383533.2	trafficking protein particle complex II-specific subunit 130 homolog (LOC103969893), mRNA	1268	75.49	1265	0	1925		NM_001350018.1	NM_001350018.1 length 1239 aa, 3720 bp, from 283..4002 of NM_001350018.1 Zea mays uncharacterized LOC100381936 (LOC100381936), mRNA	1239	69.91	1263	0	1786		XM_004244152.3	trafficking protein particle complex II-specific subunit 130 homolog (LOC101247141), transcript variant X1, mRNA	1254	73.58	1264	0	1883		XM_002281885.4	trafficking protein particle complex II-specific subunit 130 homolog (LOC100253761), mRNA	1259	78.26	1265	0	2004		XM_007213665.2	trafficking protein particle complex II-specific subunit 130 homolog (LOC18778388), mRNA	1259	76.6	1265	0	1965
	UN000805	XM_020674793.1	uncharacterized ATP-dependent helicase YprA (LOC18446119), transcript variant X2, mRNA	1196	71.83	387	0	568		XM_018830355.1	uncharacterized ATP-dependent helicase YprA (LOC103993793), transcript variant X6, mRNA	1198	70.94	523	0	783		XM_008655111.2	uncharacterized ATP-dependent helicase YprA (LOC103633409), mRNA	1020	65.05	555	0	732		XM_010320572.2	uncharacterized ATP-dependent helicase YprA (LOC101244477), transcript variant X4, mRNA	1222	70.52	519	0	771		XM_019226644.1	uncharacterized ATP-dependent helicase YprA (LOC100257644), transcript variant X5, mRNA	1020	73.58	530	0	822		XM_020563679.1	uncharacterized ATP-dependent helicase YprA (LOC18776230), transcript variant X1, mRNA	1244	65.83	559	0	722
	UN000807	XM_011629244.2	Niemann-Pick C1 protein (LOC18445553), mRNA	1297	78.94	1244	0	1909		XM_009385739.2	Niemann-Pick C1 protein-like (LOC103971663), mRNA	1235	76.01	1242	0	1842		XM_008665285.2	Niemann-Pick C1 protein (LOC103641981), mRNA	1321	69.85	1247	0	1676		XM_004238387.3	Niemann-Pick C1 protein (LOC101260723), mRNA	1294	77.89	1244	0	1901		XM_019216671.1	Niemann-Pick C1 protein (LOC100242789), mRNA	1294	81.11	1244	0	1986		XM_020570093.1	Niemann-Pick C1 protein (LOC18768332), transcript variant X1, mRNA	1342	77.21	1242	0	1883
	UN000809	XM_020664008.1	pentatricopeptide repeat-containing protein At5g61990, mitochondrial (LOC18428744), transcript variant X1, mRNA	1047	53.66	997	0	1028		XM_009414500.2	pentatricopeptide repeat-containing protein At5g61990, mitochondrial (LOC103994174), mRNA	1079	50.81	982	0	979		XM_020546816.1	pentatricopeptide repeat-containing protein At5g55840 (LOC103643672), transcript variant X12, mRNA	1049	29.38	844	4e-123	401		XM_010320368.2	pentatricopeptide repeat-containing protein At5g61990, mitochondrial (LOC101246618), transcript variant X1, mRNA	1035	46.04	984	0	864		XM_002267911.4	pentatricopeptide repeat-containing protein At5g61990, mitochondrial (LOC100245882), mRNA	1020	54.03	992	0	1049		XM_020563712.1	pentatricopeptide repeat-containing protein At5g61990, mitochondrial (LOC18778122), mRNA	1019	50.2	994	0	990
	UN000811	XM_020661988.1	uncharacterized LOC18425368 (LOC18425368), transcript variant X1, mRNA	1319	41.3	92	3e-11	68.6		---	---	0	---	---	---	---		---	---	0	---	---	---	---		---	---	0	---	---	---	---		XM_010649053.2	uncharacterized LOC100853492 (LOC100853492), mRNA	1370	41.44	111	6e-15	80.9		XM_007204619.2	uncharacterized LOC18771182 (LOC18771182), mRNA	1328	37	100	2e-07	56.2
	UN000812	XM_006827251.3	cell division cycle and apoptosis regulator protein 1 (LOC18422033), transcript variant X1, mRNA	1381	36.63	243	9e-21	92.8		XM_009385653.2	uncharacterized LOC103971595 (LOC103971595), transcript variant X2, mRNA	1426	33.47	239	1e-18	87		---	---	0	---	---	---	---		XM_004236837.3	cell division cycle and apoptosis regulator protein 1 (LOC101251176), mRNA	1363	26.97	267	1e-13	71.6		XM_010653554.2	cell division cycle and apoptosis regulator protein 1 (LOC100260241), transcript variant X2, mRNA	1447	33.57	280	2e-22	97.8		XM_020565105.1	cell division cycle and apoptosis regulator protein 1 (LOC18792366), mRNA	1421	30	280	1e-16	80.5
	UN000813	XM_011628467.2	nuclear poly(A) polymerase 4 (LOC18443481), transcript variant X2, mRNA	685	82.73	527	0	901		XM_009423017.2	nuclear poly(A) polymerase 4-like (LOC104000875), transcript variant X1, mRNA	718	84.9	543	0	976		XM_008649854.2	uncharacterized LOC100382126 (LOC100382126), transcript variant X7, mRNA	768	81.07	523	0	922		XM_004245094.3	nuclear poly(A) polymerase 4-like (LOC101247241), transcript variant X3, mRNA	788	79.18	538	0	882		XM_019222233.1	nuclear poly(A) polymerase 4 (LOC100263460), transcript variant X2, mRNA	760	83.95	542	0	952		XM_007216381.2	nuclear poly(A) polymerase 4 (LOC18782742), transcript variant X2, mRNA	714	84.28	528	0	929
	UN000814	XM_011625223.2	pentatricopeptide repeat-containing protein At5g13270, chloroplastic (LOC18434353), mRNA	768	54.99	711	0	821		XM_018822503.1	pentatricopeptide repeat-containing protein At5g13270, chloroplastic (LOC103975748), transcript variant X1, mRNA	1042	56.54	711	0	834		XM_008671236.2	pentatricopeptide repeat-containing protein At4g13650 (LOC103646503), transcript variant X1, mRNA	924	35.67	698	3e-159	485		XM_019212321.1	pentatricopeptide repeat-containing protein At4g13650 (LOC101266794), transcript variant X1, mRNA	1057	36.18	702	5e-164	501		XM_010658519.2	pentatricopeptide repeat-containing protein At5g13270, chloroplastic (LOC104880782), mRNA	768	59.01	710	0	870		XM_020570144.1	pentatricopeptide repeat-containing protein At5g13270, chloroplastic (LOC109950605), mRNA	764	57.55	709	0	853
	UN000815	XM_006842471.3	uncharacterized LOC18432362 (LOC18432362), transcript variant X1, mRNA	963	38.26	622	1e-100	326		XM_009382253.2	uncharacterized LOC103968903 (LOC103968903), transcript variant X1, mRNA	856	36.99	438	1e-77	263		NM_001176021.1	NM_001176021.1 length 550 aa, 1653 bp, from 22..1674 of NM_001176021.1 Zea mays Extra-large G-protein-like (IDP359), mRNA	550	34.46	444	5e-66	225		XM_004245488.3	protein ENHANCED DISEASE RESISTANCE 4 (LOC101262940), mRNA	947	36.99	438	7e-71	245		XM_002271071.4	uncharacterized LOC100243335 (LOC100243335), mRNA	958	37.47	467	1e-80	273		XM_007220206.2	protein ENHANCED DISEASE RESISTANCE 4 (LOC18787034), mRNA	945	36.23	483	7e-78	264
	UN000816	XM_011629201.2	pentatricopeptide repeat-containing protein At2g26790, mitochondrial (LOC18445424), transcript variant X1, mRNA	847	47.06	85	5e-13	72.8		XM_009393933.2	pentatricopeptide repeat-containing protein At2g26790, mitochondrial-like (LOC103978220), transcript variant X1, mRNA	845	42.5	80	9e-11	66.2		XM_008676275.2	pentatricopeptide repeat-containing protein At2g26790, mitochondrial-like (LOC103650710), transcript variant X1, mRNA	824	32.99	97	7e-07	53.5		XM_010322601.2	pentatricopeptide repeat-containing protein At2g26790, mitochondrial (LOC101266822), transcript variant X3, mRNA	834	46.67	75	1e-12	72		XM_002268028.3	pentatricopeptide repeat-containing protein At2g26790, mitochondrial (LOC100243250), transcript variant X1, mRNA	848	43.21	81	1e-12	72		XM_020562628.1	pentatricopeptide repeat-containing protein At2g26790, mitochondrial (LOC18780374), transcript variant X1, mRNA	838	43.37	83	3e-14	76.6
	UN000817	---	---	0	---	---	---	---		XM_009395472.2	LRR receptor-like serine/threonine-protein kinase RPK2 (LOC103979355), transcript variant X3, mRNA	1044	51.79	56	5e-10	64.3		XM_020548223.1	probable LRR receptor-like serine/threonine-protein kinase At1g63430 (LOC103648480), mRNA	653	45.1	51	3e-06	52		XM_004248655.3	probably inactive leucine-rich repeat receptor-like protein kinase At2g25790 (LOC101262461), mRNA	478	50	54	1e-07	55.5		XM_010662367.2	LRR receptor-like serine/threonine-protein kinase RPK2 (LOC100258356), mRNA	1085	50.94	53	2e-07	56.2		---	---	0	---	---	---	---
	UN000819	XM_020668529.1	HEAT repeat-containing protein 6 (LOC18436451), mRNA	1162	51.96	1174	0	1059		XM_009409577.2	HEAT repeat-containing protein 6 (LOC103990444), transcript variant X1, mRNA	1187	54.66	1169	0	1078		XM_020546102.1	HEAT repeat-containing protein 6 (LOC103641294), transcript variant X3, mRNA	1163	47.65	1171	0	929		XM_010325018.2	HEAT repeat-containing protein 6 (LOC101253001), transcript variant X1, mRNA	1057	49.18	1102	0	939		XM_010662112.2	HEAT repeat-containing protein 6 (LOC100265120), transcript variant X1, mRNA	1197	59.48	1197	0	1268		XM_020564595.1	uncharacterized LOC18776418 (LOC18776418), transcript variant X1, mRNA	1186	55.35	1187	0	1124
	UN000820	XM_006848000.3	chromosomes protein 3 (LOC18437801), transcript variant X1, mRNA	1203	75.77	1201	0	1765		XM_009390551.1	structural maintenance of chromosomes protein 3 (LOC103975554), transcript variant X1, mRNA	1204	75.91	1204	0	1795		NM_001350802.1	NM_001350802.1 length 1204 aa, 3615 bp, from 257..3871 of NM_001350802.1 Zea mays structural maintenance of chromosomes protein 3 (LOC103630807), mRNA	1204	68.36	1201	0	1578		XM_004241322.3	structural maintenance of chromosomes protein 3 (LOC100125911), mRNA	1201	72.52	1201	0	1704		XM_002273282.4	structural maintenance of chromosomes protein 3 (LOC100257283), transcript variant X1, mRNA	1204	78.16	1204	0	1827		XM_007208669.2	structural maintenance of chromosomes protein 3 (LOC18774440), mRNA	1204	76.83	1204	0	1806
	UN000822	XM_006842284.3	zinc finger protein BRUTUS (LOC18432174), mRNA	1218	69.16	1258	0	1667		XM_009419853.2	uncharacterized LOC103998391 (LOC103998391), mRNA	1284	66.51	1293	0	1625		XM_008676945.2	zinc finger protein-related (LOC103651324), transcript variant X2, mRNA	1231	67.46	1211	0	1582		XM_004238866.3	uncharacterized LOC101250214 (LOC101250214), mRNA	1241	67.85	1210	0	1615		XM_002279499.4	zinc finger protein BRUTUS (LOC100255880), mRNA	1243	73.31	1259	0	1788		XM_007210428.2	zinc finger protein BRUTUS (LOC18775902), mRNA	1250	72.2	1259	0	1710
	UN000823	XM_006828568.3	1-phosphatidylinositol-3-phosphate 5-kinase FAB1B (LOC18423974), transcript variant X1, mRNA	1877	62.02	1090	0	1249		XM_009405823.2	1-phosphatidylinositol-3-phosphate 5-kinase FAB1B-like (LOC103987499), transcript variant X3, mRNA	1786	62.44	1001	0	1168		XM_008658432.2	1-phosphatidylinositol-3-phosphate 5-kinase FAB1B (LOC103636073), transcript variant X1, mRNA	1822	58.03	1003	0	1078		XM_004235482.3	1-phosphatidylinositol-3-phosphate 5-kinase FAB1B-like (LOC101246905), transcript variant X4, mRNA	1784	59.69	1037	0	1169		XM_010656070.2	1-phosphatidylinositol-3-phosphate 5-kinase FAB1B (LOC100254952), transcript variant X1, mRNA	1847	64.23	1082	0	1300		XM_020561070.1	1-phosphatidylinositol-3-phosphate 5-kinase FAB1B (LOC18781849), transcript variant X1, mRNA	1823	61.73	1087	0	1243
	UN000824	XM_006829604.3	uncharacterized LOC18425033 (LOC18425033), mRNA	1064	58.34	1037	0	1167		XM_009409368.2	uncharacterized LOC103990287 (LOC103990287), mRNA	1070	61.28	1077	0	1253		XM_008675412.2	hypothetical protein (LOC103649676), mRNA	1117	48.77	1054	0	964		XM_004235679.3	uncharacterized LOC101255778 (LOC101255778), mRNA	1051	57.42	1031	0	1146		XM_002280864.3	uncharacterized LOC100248030 (LOC100248030), mRNA	1059	59.06	1043	0	1170		XM_007214849.2	uncharacterized LOC18782897 (LOC18782897), mRNA	1067	56.13	1085	0	1169
	UN000825	XM_020675897.1	phospholipase A I (LOC18447933), transcript variant X1, mRNA	1309	73.13	1321	0	1828		XM_009407347.2	phospholipase A I (LOC103988728), transcript variant X1, mRNA	1366	74.05	1337	0	1851		XM_008652825.2	Phospholipase A I (LOC100272617), transcript variant X1, mRNA	1335	70.66	1336	0	1807		XM_010318297.2	phospholipase A I (LOC101257235), mRNA	1348	68.88	1353	0	1754		XM_010657058.2	phospholipase A I (LOC104880454), transcript variant X1, mRNA	1316	74.96	1314	0	1906		XM_020562105.1	phospholipase A I (LOC18779889), transcript variant X1, mRNA	1337	73.85	1323	0	1908
	UN000826	XM_011629083.2	sister-chromatid cohesion protein 3 (LOC18445164), mRNA	1176	68.13	1004	0	1334		XM_009409965.2	sister-chromatid cohesion protein 3 (LOC103990721), mRNA	1127	73.69	1030	0	1463		XM_008672674.2	sister-chromatid cohesion protein 3 (LOC103648187), mRNA	1134	66.46	963	0	1272		XM_004239283.3	sister-chromatid cohesion protein 3 (LOC101267707), transcript variant X1, mRNA	1100	66.29	973	0	1241		XM_019221250.1	sister-chromatid cohesion protein 3 (LOC100242474), transcript variant X2, mRNA	1168	73.24	1020	0	1435		XM_007200259.2	sister-chromatid cohesion protein 3 (LOC18766819), transcript variant X1, mRNA	1125	68.41	1035	0	1362
	UN000827	XM_020670054.1	trafficking protein particle complex II-specific subunit 120 homolog (LOC18438572), transcript variant X4, mRNA	1040	73.33	120	4e-52	199		XM_018819217.1	trafficking protein particle complex II-specific subunit 120 homolog (LOC103969667), transcript variant X2, mRNA	986	77.05	122	2e-54	207		XM_008670979.2	trafficking protein particle complex II-specific subunit 120 homolog (LOC103646252), mRNA	1219	70.49	122	2e-48	189		XM_004241744.3	trafficking protein particle complex II-specific subunit 120 homolog (LOC101266526), mRNA	1185	77.87	122	6e-55	209		XM_010650407.2	trafficking protein particle complex II-specific subunit 120 homolog (LOC100259475), transcript variant X1, mRNA	1206	77.87	122	2e-55	211		XM_020554334.1	trafficking protein particle complex II-specific subunit 120 homolog (LOC18791309), transcript variant X3, mRNA	979	79.51	122	1e-55	211
	UN000828	XM_006843804.3	RRP12-like protein (LOC18433723), mRNA	1309	59.08	1234	0	1324		XM_009421690.2	RRP12-like protein (LOC103999825), mRNA	1290	61.06	1225	0	1319		XM_020538719.1	RRP12-like protein (LOC103627825), mRNA	1274	51.89	1139	0	1044		XM_004243639.3	RRP12-like protein (LOC101244787), mRNA	1291	60.02	1238	0	1373		XM_010659585.2	RRP12-like protein (LOC100257035), transcript variant X1, mRNA	1273	63.9	1219	0	1460		XM_020569135.1	RRP12-like protein (LOC18769714), mRNA	1263	61.62	1222	0	1356
	UN000829	XM_011623880.2	uncharacterized LOC18431026 (LOC18431026), mRNA	1225	71.44	1040	0	1468		XM_009393066.2	uncharacterized LOC103977519 (LOC103977519), mRNA	1317	73.69	1015	0	1476		XM_008683256.2	uncharacterized LOC100273763 (pco133309c), transcript variant X1, mRNA	1378	70.17	1009	0	1412		XM_004237932.3	uncharacterized LOC101250110 (LOC101250110), mRNA	1280	72.75	1020	0	1483		XM_010666072.2	uncharacterized LOC100254008 (LOC100254008), mRNA	1255	74.34	1029	0	1537		XM_007227013.2	uncharacterized LOC18789264 (LOC18789264), mRNA	1235	72.63	1012	0	1470
	UN000830	XM_011626344.2	AG-4 protein 2 (LOC18437596), mRNA	1486	61.72	418	2e-116	393		XM_009394564.2	protein HUA2-LIKE 1-like (LOC103978681), transcript variant X1, mRNA	1544	58.68	438	6e-118	399		NM_001177055.1	NM_001177055.1 length 727 aa, 2184 bp, from 14..2197 of NM_001177055.1 Zea mays ENHANCER OF AG-4 protein 2 (LOC100384540), mRNA	727	56.77	310	5e-83	286		XM_019212124.1	ENHANCER OF AG-4 protein 2 (LOC101245706), transcript variant X3, mRNA	1421	59.44	429	1e-104	359		XM_010650143.2	ENHANCER OF AG-4 protein 2 (LOC100255898), transcript variant X3, mRNA	1677	64.33	457	1e-127	427		XM_020554323.1	ENHANCER OF AG-4 protein 2 (LOC18790503), transcript variant X5, mRNA	1403	66.11	416	1e-133	439
	UN000831	XM_020668529.1	HEAT repeat-containing protein 6 (LOC18436451), mRNA	1162	51.79	1174	0	1054		XM_009409577.2	HEAT repeat-containing protein 6 (LOC103990444), transcript variant X1, mRNA	1187	54.66	1169	0	1077		XM_020546102.1	HEAT repeat-containing protein 6 (LOC103641294), transcript variant X3, mRNA	1163	47.57	1171	0	926		XM_010325018.2	HEAT repeat-containing protein 6 (LOC101253001), transcript variant X1, mRNA	1057	49.09	1102	0	934		XM_010662112.2	HEAT repeat-containing protein 6 (LOC100265120), transcript variant X1, mRNA	1197	59.15	1197	0	1261		XM_020564595.1	uncharacterized LOC18776418 (LOC18776418), transcript variant X1, mRNA	1186	55.27	1187	0	1122
	UN000832	XM_020662601.1	transcription factor MYB3R-4 (LOC18426614), transcript variant X3, mRNA	900	68.44	263	5e-105	349		XM_009391692.2	myb-related protein 3R-1-like (LOC103976479), transcript variant X1, mRNA	1087	45.01	1093	0	717		XM_008675131.2	Myb-related protein 3R-1 (LOC100502241), transcript variant X2, mRNA	846	80.63	191	7e-105	348		XM_004245217.3	myb-related protein 3R-1-like (LOC101259775), transcript variant X1, mRNA	1059	41.43	1062	0	649		XM_010650213.2	myb-related protein 3R-1 (LOC100261001), transcript variant X1, mRNA	1064	46.23	1088	0	737		XM_020563685.1	transcription factor MYB3R-1 (LOC18789423), mRNA	1038	44.2	1077	0	690
	UN000833	XM_006828893.3	ATP-dependent zinc metalloprotease FTSH 1, chloroplastic (LOC18424304), mRNA	713	94.48	598	0	1058		XM_009397102.2	ATP-dependent zinc metalloprotease FTSH 1, chloroplastic (LOC103980648), mRNA	712	93.99	599	0	1059		NM_001196900.1	NM_001196900.1 length 559 aa, 1680 bp, from 30..1709 of NM_001196900.1 Zea mays uncharacterized LOC100502422 (LOC100502422), mRNA	559	93.73	558	0	977		NM_001247267.2	NM_001247267.2 length 708 aa, 2127 bp, from 91..2217 of NM_001247267.2 Solanum lycopersicum FtsH-like protein precursor (LOC100037730), mRNA	708	89.82	668	0	1087		XM_002285889.4	ATP-dependent zinc metalloprotease FTSH, chloroplastic (LOC100250509), mRNA	706	93.27	639	0	1080		XM_007221842.2	ATP-dependent zinc metalloprotease FTSH, chloroplastic (LOC18788845), mRNA	719	88.48	677	0	1103
	UN000834	XM_011627498.2	uncharacterized LOC18440835 (LOC18440835), transcript variant X2, mRNA	1223	80.87	1223	0	1863		XM_009423036.1	uncharacterized LOC104000887 (LOC104000887), mRNA	1210	80.31	1219	0	1833		XM_008670089.2	SH3 domain-containing protein (LOC100274171), transcript variant X1, mRNA	1230	75.16	1220	0	1680		XM_010322821.2	uncharacterized LOC101261231 (LOC101261231), transcript variant X1, mRNA	1197	79.79	1163	0	1745		XM_010654598.2	uncharacterized LOC100266278 (LOC100266278), transcript variant X1, mRNA	1213	82.25	1217	0	1897		XM_020568036.1	uncharacterized LOC18770000 (LOC18770000), mRNA	1209	77.89	1167	0	1712
	UN000835	XM_006841492.3	paladin (LOC18431367), transcript variant X1, mRNA	1294	76.39	1262	0	1999		XM_009388311.2	paladin (LOC103973679), mRNA	1269	77.71	1247	0	2019		XM_008666796.2	hypothetical protein (LOC103643638), mRNA	1430	73.8	1252	0	1888		XM_004229105.3	paladin (LOC101252426), mRNA	1255	75.84	1246	0	1975		XM_002281992.4	paladin (LOC100245180), mRNA	1257	81.59	1249	0	2118		XM_007221400.2	paladin (LOC18788021), transcript variant X1, mRNA	1256	81.35	1249	0	2096
	UN000836	XM_006853320.3	probable phospholipid-transporting ATPase 5 (LOC18443121), mRNA	1244	68.59	1245	0	1693		XM_009410589.2	phospholipid-transporting ATPase 6-like (LOC103991225), transcript variant X1, mRNA	1220	60.08	1230	0	1453		XM_008661370.2	probable phospholipid-transporting ATPase 4 (LOC103638467), transcript variant X1, mRNA	1219	57.93	1236	0	1418		XM_004233152.3	probable phospholipid-transporting ATPase 4 (LOC101245719), mRNA	1243	65.01	1249	0	1653		XM_019217934.1	probable phospholipid-transporting ATPase 7 (LOC100264967), mRNA	1210	69.67	1243	0	1713		XM_020561696.1	probable phospholipid-transporting ATPase 5 (LOC18778156), mRNA	1330	67.9	1243	0	1662
	UN000838	NM_001305827.1	NM_001305827.1 Amborella trichopoda auxin response factor 6 (LOC18437712), mRNA	838	59.13	893	0	914		XM_009400955.2	auxin response factor 17 (LOC103983691), transcript variant X1, mRNA	909	66.78	918	0	1125		NM_001346802.1	NM_001346802.1 length 946 aa, 2841 bp, from 562..3402 of NM_001346802.1 Zea mays Auxin response factor 18 (LOC100502480), mRNA	946	61.89	929	0	1017		NM_001247734.1	NM_001247734.1 length 881 aa, 2646 bp, from 1..2646 of NM_001247734.1 Solanum lycopersicum auxin response factor 6 (ARF6), mRNA	881	62.26	901	0	960		XM_002279772.3	auxin response factor 6 (LOC100242923), transcript variant X1, mRNA	922	72.63	917	0	1224		XM_020562547.1	auxin response factor 6 (LOC18780684), mRNA	889	70.29	902	0	1166
	UN000839	XM_006842933.3	xanthine dehydrogenase/oxidase (LOC18432832), transcript variant X1, mRNA	1280	70.94	1270	0	1825		XM_009407760.2	xanthine dehydrogenase (LOC103989027), mRNA	1387	32.46	1337	0	598		XM_008659233.2	xanthine dehydrogenase (LOC100384368), mRNA	1371	32.42	1345	0	573		XM_004250902.3	xanthine dehydrogenase 1-like (LOC101252457), mRNA	1369	32.69	1349	0	605		XM_002285437.3	xanthine dehydrogenase 1 (LOC100248547), mRNA	1386	33.04	1350	0	627		XM_007213673.2	xanthine dehydrogenase 1 (LOC18780893), transcript variant X1, mRNA	1369	32.74	1353	0	590
	UN000840	XM_020672312.1	uncharacterized LOC18442351 (LOC18442351), mRNA	1145	57.29	377	2e-117	391		XM_009406157.2	uncharacterized LOC103987763 (LOC103987763), mRNA	1437	65.71	487	0	590		---	---	0	---	---	---	---		XM_004229939.3	uncharacterized LOC101253533 (LOC101253533), mRNA	1222	60.95	484	0	585		XM_002263574.3	uncharacterized LOC100245070 (LOC100245070), transcript variant X1, mRNA	1149	44.68	1202	0	771		XM_007219410.2	uncharacterized LOC18787096 (LOC18787096), mRNA	1203	55.17	609	0	597
	UN000841	XM_006838859.3	uncharacterized LOC18429574 (LOC18429574), transcript variant X2, mRNA	1246	55.65	1089	0	1118		XM_009404096.2	uncharacterized LOC103986170 (LOC103986170), mRNA	1148	55.36	1111	0	1107		XM_008668634.2	uncharacterized LOC103645607 (LOC103645607), mRNA	1113	51.03	1115	0	1004		XM_004247629.3	uncharacterized LOC101254942 (LOC101254942), mRNA	1118	51.7	1116	0	983		XM_002279350.3	ras guanine nucleotide exchange factor L (LOC100249467), mRNA	1117	59.96	1109	0	1182		XM_007225362.2	uncharacterized LOC18788907 (LOC18788907), mRNA	1126	52.82	1117	0	1008
	UN000842	XM_020675588.1	uncharacterized LOC18447548 (LOC18447548), transcript variant X2, mRNA	1552	39.29	425	8e-84	280		XM_009416027.2	uncharacterized LOC103995433 (LOC103995433), mRNA	620	40.14	416	4e-86	275		XM_020543906.1	uncharacterized LOC103638705 (LOC103638705), transcript variant X1, mRNA	1078	34.77	417	1e-61	216		XM_004243832.3	uncharacterized LOC101266239 (LOC101266239), transcript variant X1, mRNA	1367	32.94	419	2e-58	206		XM_010659196.2	uncharacterized LOC100244248 (LOC100244248), transcript variant X1, mRNA	1445	44.79	422	3e-105	340		XM_020560517.1	uncharacterized LOC18784476 (LOC18784476), transcript variant X1, mRNA	1432	41.9	420	2e-95	312
	UN000843	XM_006852361.3	SCAR-like protein 2 (LOC18442137), transcript variant X1, mRNA	1119	44.19	439	7e-96	317		XM_009421486.2	SCAR-like protein 2 (LOC103999674), transcript variant X1, mRNA	1205	42.48	612	3e-129	408		XM_008657535.2	SCAR-like protein 2 (LOC103634962), transcript variant X1, mRNA	1369	42.98	477	7e-92	309		XM_004232975.3	protein SCAR1 (LOC101267374), transcript variant X1, mRNA	1301	48.65	333	6e-83	283		XM_019222604.1	protein SCAR3 (LOC100249697), transcript variant X2, mRNA	1147	47.74	620	6e-147	453		XM_020561824.1	protein SCAR3 (LOC18780732), mRNA	1237	49.53	430	4e-119	381
	UN000844	XM_006858965.3	protein SPA1-RELATED 4 (LOC18448910), transcript variant X1, mRNA	927	76.53	196	2e-98	328		XM_009404553.2	protein SPA1-RELATED 4 (LOC103986537), transcript variant X1, mRNA	846	70.92	196	2e-86	294		XM_008658604.2	protein SPA1-RELATED 4 (LOC103636244), transcript variant X1, mRNA	790	72.31	195	2e-95	317		XM_004244184.3	protein SPA1-RELATED 4-like (LOC101256107), transcript variant X1, mRNA	879	75.9	195	6e-93	312		XM_010658673.2	protein SPA1-RELATED 4 (LOC100253988), transcript variant X3, mRNA	861	73.98	196	1e-92	311		XM_020561975.1	protein SPA1-RELATED 3 (LOC18779266), transcript variant X1, mRNA	905	67.76	214	1e-91	309
	UN000846	XM_020674441.1	soluble starch synthase 3, chloroplastic/amyloplastic (LOC18445704), transcript variant X3, mRNA	1112	74.01	931	0	1363		XM_009385927.2	starch synthase 3, chloroplastic/amyloplastic (SSIII), mRNA	1315	75.78	929	0	1404		NM_001112546.1	NM_001112546.1 length 1192 aa, 3579 bp, from 29..3607 of NM_001112546.1 Zea mays starch synthase IIIb-2 precursor (LOC100101528), mRNA	1192	67.47	910	0	1249		NM_001247694.1	NM_001247694.1 length 1235 aa, 3708 bp, from 100..3807 of NM_001247694.1 Solanum lycopersicum starch synthase III (LOC100316882), mRNA	1235	74.65	923	0	1397		XM_002268975.4	starch synthase 3, chloroplastic/amyloplastic (LOC100241917), transcript variant X1, mRNA	1177	78.99	928	0	1457		XM_020561849.1	starch synthase 3, chloroplastic/amyloplastic (LOC18779016), transcript variant X1, mRNA	1185	78.15	929	0	1447
	UN000847	XM_020670144.1	probable histidine kinase 5 (LOC18438816), transcript variant X6, mRNA	1031	60.97	966	0	1095		XM_009415812.2	probable histidine kinase 4 (LOC103995262), transcript variant X1, mRNA	990	72.08	942	0	1342		NM_001112443.1	NM_001112443.1 length 996 aa, 2991 bp, from 16..3006 of NM_001112443.1 Zea mays histidine kinase (HK1b2), mRNA	996	67.27	938	0	1253		XM_004236874.3	histidine kinase 4 (LOC101262506), mRNA	1003	68.81	949	0	1250		XM_010650660.2	histidine kinase 4 (LOC100254304), transcript variant X3, mRNA	1046	74.58	948	0	1394		XM_007225313.2	histidine kinase 4 (LOC18791738), mRNA	1022	72.52	946	0	1329
	UN000848	XM_020669053.1	RNA polymerase II C-terminal domain phosphatase-like 1 (LOC18423151), mRNA	954	64.36	968	0	1184		XM_009414858.2	RNA polymerase II C-terminal domain phosphatase-like 1 (LOC103994501), mRNA	949	61.41	964	0	1145		NM_001321632.1	NM_001321632.1 length 944 aa, 2835 bp, from 467..3301 of NM_001321632.1 Zea mays RNA polymerase II C-terminal domain phosphatase-like 1 (LOC100383723), mRNA	944	56.54	955	0	1004		XM_004232796.3	RNA polymerase II C-terminal domain phosphatase-like 1 (LOC101266384), mRNA	954	62.07	978	0	1130		XM_002267951.4	RNA polymerase II C-terminal domain phosphatase-like 1 (LOC100255024), mRNA	966	68.53	966	0	1308		XM_020561864.1	RNA polymerase II C-terminal domain phosphatase-like 1 (LOC18781340), mRNA	958	67.11	973	0	1251
	UN000850	XM_006858047.3	DNA polymerase I A, chloroplastic (LOC18447964), mRNA	1236	86.34	366	0	669		XM_018818012.1	DNA polymerase I A, chloroplastic-like (LOC103997828), mRNA	1019	85.04	361	0	636		XM_008665419.2	DNA polymerase I A, chloroplastic (LOC103642101), mRNA	1040	82.74	365	0	634		XM_004244087.3	DNA polymerase I B, chloroplastic/mitochondrial (LOC101252794), mRNA	1139	81.62	359	0	603		XM_010645797.2	DNA polymerase I B, chloroplastic/mitochondrial (LOC100257153), transcript variant X1, mRNA	1118	84.3	363	0	636		XM_020562596.1	DNA polymerase I B, chloroplastic/mitochondrial (LOC18780419), transcript variant X2, mRNA	1086	81.94	360	0	613
	UN000853	XM_006854030.3	pentatricopeptide repeat-containing protein At5g27270 (LOC18443849), transcript variant X1, mRNA	1053	62.57	1002	0	1296		XM_009387961.2	pentatricopeptide repeat-containing protein At5g27270 (LOC103973405), mRNA	1069	67.33	998	0	1370		XM_008660657.2	uncharacterized LOC100383512 (LOC100383512), transcript variant X1, mRNA	1085	54.25	1001	0	1069		XM_010319977.2	pentatricopeptide repeat-containing protein At5g27270 (LOC101248463), mRNA	1065	59.84	1021	0	1235		XM_002274065.2	pentatricopeptide repeat-containing protein At5g27270 (LOC100261338), mRNA	1071	66.44	1013	0	1371		XM_020558669.1	pentatricopeptide repeat-containing protein At5g27270 (LOC18787000), mRNA	1083	64.1	1000	0	1301
	UN000855	XM_006838242.3	cellulose synthase A catalytic subunit 3 [UDP-forming] (LOC18428946), transcript variant X2, mRNA	1098	89.76	1084	0	1928		XM_009409305.2	probable cellulose synthase A catalytic subunit 8 [UDP-forming] (LOC103990225), transcript variant X1, mRNA	1075	86.73	1085	0	1857		NM_001112151.2	NM_001112151.2 length 1101 aa, 3306 bp, from 248..3553 of NM_001112151.2 Zea mays cellulose synthase-4 (CesA-4), mRNA	1101	83.39	1096	0	1801		XM_004229582.3	cellulose synthase A catalytic subunit 3 [UDP-forming] (LOC101246863), mRNA	1095	87.75	1086	0	1866		XM_002278961.3	cellulose synthase A catalytic subunit 3 [UDP-forming] (LOC100256811), mRNA	1097	90.61	1086	0	1887		XM_020558243.1	cellulose synthase A catalytic subunit 3 [UDP-forming] (LOC18785035), transcript variant X1, mRNA	1082	90.51	1085	0	1932
	UN000857	XM_011625178.2	protein FAR1-RELATED SEQUENCE 5 (LOC105420665), transcript variant X1, mRNA	876	46.92	633	0	631		XM_009409455.2	protein FAR1-RELATED SEQUENCE 9-like (LOC103990350), transcript variant X2, mRNA	717	44.43	637	0	531		XM_020549619.1	glucosamine fructose-6-phosphate aminotransferase1 (LOC100276333), transcript variant X14, mRNA	718	40.06	634	2e-159	475		XM_004231060.3	protein FAR1-RELATED SEQUENCE 5 (LOC101260088), mRNA	781	48.13	642	0	605		XM_010651023.2	protein FAR1-RELATED SEQUENCE 5 (LOC100263583), transcript variant X3, mRNA	751	50.7	643	0	649		XM_007208844.2	protein FAR1-RELATED SEQUENCE 5 (LOC18777115), mRNA	763	48.59	638	0	638
	UN000858	XM_011630697.2	uncharacterized LOC18424436 (LOC18424436), transcript variant X3, mRNA	1054	39.95	746	1e-101	343		XM_018827961.1	uncharacterized LOC103980302 (LOC103980302), mRNA	1077	43.6	773	8e-127	413		XM_008659971.2	uncharacterized LOC100217186 (AY107496), transcript variant X6, mRNA	997	39.5	719	2e-99	337		XM_010328683.2	uncharacterized LOC101257114 (LOC101257114), transcript variant X2, mRNA	990	40.92	738	5e-109	362		XM_010663503.2	uncharacterized LOC100248277 (LOC100248277), transcript variant X4, mRNA	1001	49.54	757	1e-155	487		XM_020556509.1	uncharacterized LOC18785382 (LOC18785382), mRNA	1100	46.77	759	1e-144	461
	UN000859	XM_006843093.3	protein PLASTID MOVEMENT IMPAIRED 1-RELATED 1 (LOC18432995), mRNA	1232	50.94	265	2e-53	205		XM_009384718.2	protein PLASTID MOVEMENT IMPAIRED 1-RELATED 1 (LOC103970763), mRNA	1218	43.21	280	1e-40	164		NM_001149496.1	NM_001149496.1 length 753 aa, 2262 bp, from 476..2737 of NM_001149496.1 Zea mays uncharacterized LOC100275421 (LOC100275421), mRNA	753	36.88	160	4e-21	100		XM_004239560.3	protein PLASTID MOVEMENT IMPAIRED 1-RELATED 1 (LOC101248011), mRNA	1141	56.3	238	2e-54	207		XM_010657853.2	protein PLASTID MOVEMENT IMPAIRED 1-RELATED 1 (LOC100249046), transcript variant X2, mRNA	1152	52.22	270	2e-57	217		XM_007204610.2	protein PLASTID MOVEMENT IMPAIRED 1-RELATED 1 (LOC18771815), mRNA	1145	51.56	289	5e-60	225
	UN000860	XM_020675886.1	abnormal spindle-like microcephaly-associated protein (LOC18448021), mRNA	1299	45.62	960	0	748		XM_018827680.1	abnormal spindle-like microcephaly-associated protein homolog (LOC103989847), transcript variant X3, mRNA	1222	45.65	977	0	754		XM_008654930.2	abnormal spindle-like microcephaly-associated protein homolog (LOC103633234), mRNA	1447	37.1	1054	1e-170	545		XM_010318295.2	abnormal spindle-like microcephaly-associated protein homolog (LOC101256940), transcript variant X1, mRNA	1532	43.56	1398	0	1022		XM_010649000.2	abnormal spindle-like microcephaly-associated protein homolog (LOC100246947), mRNA	1452	51.66	1324	0	1207		XM_020561466.1	abnormal spindle-like microcephaly-associated protein homolog (LOC18780175), mRNA	1415	48.92	1296	0	1083
	UN000861	XM_020667565.1	uncharacterized LOC18434793 (LOC18434793), transcript variant X3, mRNA	1226	40.83	480	1e-71	247		XM_018828787.1	uncharacterized LOC103991435 (LOC103991435), mRNA	1775	38.6	487	2e-62	221		XM_008653565.2	dentin sialophosphoprotein (LOC103631822), transcript variant X1, mRNA	1122	37.35	332	6e-49	181		XM_004236344.3	protein piccolo (LOC101256471), transcript variant X1, mRNA	1229	38.43	484	8e-65	228		XM_002276246.3	dentin sialophosphoprotein (LOC100258409), mRNA	1280	46.89	514	2e-107	347		XM_020559715.1	dentin sialophosphoprotein (LOC18782880), mRNA	1254	41.32	530	1e-88	295
	UN000863	XM_011625806.2	AP3-complex subunit beta-A (LOC18436126), transcript variant X2, mRNA	1102	53.66	369	2e-97	335		XM_009382363.2	AP3-complex subunit beta-A (LOC103968981), mRNA	1144	56.03	373	2e-94	328		NM_001176082.1	NM_001176082.1 length 790 aa, 2373 bp, from 197..2569 of NM_001176082.1 Zea mays AP3-complex subunit beta-A (LOC100383432), mRNA	790	45.68	370	5e-87	300		XM_004240779.2	AP3-complex subunit beta-A (LOC101259755), mRNA	1138	50.14	363	3e-86	304		XM_002278532.4	AP3-complex subunit beta-A (LOC100251289), mRNA	1140	57.77	367	2e-100	345		XM_007220528.2	AP3-complex subunit beta-A (LOC18786894), mRNA	1136	50.68	367	1e-99	342
	UN000864	XM_006856168.3	uncharacterized LOC18446042 (LOC18446042), transcript variant X1, mRNA	936	73.96	960	0	1347		XM_009399022.2	uncharacterized LOC103982184 (LOC103982184), mRNA	953	70.56	968	0	1293		XM_008667259.2	Pyridoxal phosphate (PLP)-dependent transferase superfamily protein (LOC103644065), mRNA	938	62.36	959	0	1076		XM_010317862.2	uncharacterized LOC101256238 (LOC101256238), mRNA	964	69.8	947	0	1225		XM_002284046.3	uncharacterized LOC100259174 (LOC100259174), mRNA	950	75.79	950	0	1344		XM_007225277.2	uncharacterized LOC18788343 (LOC18788343), mRNA	963	74.13	947	0	1343
	UN000865	XM_006856007.3	protein indeterminate-domain 2 (LOC18445881), transcript variant X1, mRNA	527	60.23	347	1e-118	355		XM_009398128.2	protein indeterminate-domain 2 (LOC103981400), mRNA	515	56.31	428	4e-118	354		XM_008650781.2	indeterminate domain p1 (gpm243b), transcript variant X6, mRNA	546	87.65	162	3e-97	301		XM_004238193.3	protein indeterminate-domain 2-like (LOC101254481), mRNA	501	51.49	435	3e-114	343		XM_002271922.4	protein indeterminate-domain 2 (LOC100263342), mRNA	507	64.07	462	2e-146	426		XM_007204263.2	protein indeterminate-domain 2 (LOC18771093), mRNA	518	60.59	472	2e-136	400
	UN000866	XM_011622263.2	uncharacterized LOC18426645 (LOC18426645), mRNA	1134	27.42	361	1e-18	88.2		XM_009394142.2	uncharacterized LOC103978368 (LOC103978368), transcript variant X1, mRNA	1117	28.61	332	3e-18	87.4		---	---	0	---	---	---	---		---	---	0	---	---	---	---		XM_010650207.2	protein EMBRYONIC FLOWER 1 (LOC104878998), transcript variant X1, mRNA	1344	28.78	410	3e-30	123		XM_020554546.1	protein EMBRYONIC FLOWER 1 (LOC18791016), transcript variant X2, mRNA	1286	28.75	400	2e-18	87.8
	UN000868	---	---	0	---	---	---	---		XM_009398311.2	uncharacterized LOC103981560 (LOC103981560), mRNA	740	45.55	742	0	592		---	---	0	---	---	---	---		XM_019215369.1	uncharacterized LOC101253112 (LOC101253112), mRNA	746	46.19	721	0	567		XM_002266665.1	uncharacterized LOC100262529 (LOC100262529), mRNA	754	50.55	732	0	665		XM_007210281.2	uncharacterized LOC18775690 (LOC18775690), mRNA	758	47.91	741	0	640
	UN000870	XM_006829576.3	transcriptional corepressor LEUNIG (LOC18424981), transcript variant X4, mRNA	864	77.97	699	0	933		XM_009409364.2	transcriptional corepressor LEUNIG-like (LOC103990285), transcript variant X4, mRNA	898	79.02	734	0	1003		XM_008656296.2	Transcriptional corepressor LEUNIG (LOC100217300), transcript variant X1, mRNA	898	63.98	744	0	828		XM_010324441.2	transcriptional corepressor LEUNIG (LOC101244675), transcript variant X5, mRNA	894	71.14	745	0	953		XM_010650309.2	transcriptional corepressor LEUNIG (LOC100266189), transcript variant X4, mRNA	901	76.57	747	0	998		XM_020570756.1	transcriptional corepressor LEUNIG (LOC18793976), transcript variant X3, mRNA	909	76.93	737	0	1009
	UN000871	XM_020673570.1	microtubule-associated protein TORTIFOLIA1 (LOC18421448), mRNA	626	47.58	496	8e-135	408		XM_018823621.1	uncharacterized LOC103978817 (LOC103978817), transcript variant X3, mRNA	595	47.24	633	7e-163	479		NM_001149144.1	NM_001149144.1 length 640 aa, 1923 bp, from 132..2054 of NM_001149144.1 Zea mays uncharacterized LOC100274885 (LOC100274885), mRNA	640	50.5	503	5e-156	463		XM_004234756.3	uncharacterized LOC101262788 (LOC101262788), transcript variant X1, mRNA	599	45.44	636	1e-153	455		XM_010655538.2	uncharacterized LOC100262437 (LOC100262437), mRNA	615	49.76	635	0	530		XM_007203328.2	uncharacterized LOC18770313 (LOC18770313), mRNA	623	48.65	631	1e-169	497
	UN000872	XM_006857902.3	phospholipase D gamma 1 (LOC18447816), mRNA	1104	74.07	864	0	1350		XM_009403796.2	phospholipase D gamma 1-like (LOC103985942), transcript variant X1, mRNA	1021	73.96	864	0	1329		NM_001323283.1	NM_001323283.1 length 1080 aa, 3243 bp, from 167..3409 of NM_001323283.1 Zea mays phospholipase D family protein (LOC100501678), mRNA	1080	69.92	851	0	1257		NM_001247179.1	NM_001247179.1 length 895 aa, 2688 bp, from 63..2750 of NM_001247179.1 Solanum lycopersicum phospholipase PLDb2 (PLDb2), mRNA	895	70.96	885	0	1345		XM_010663129.2	phospholipase D beta 1-like (LOC100252995), transcript variant X1, mRNA	850	75.36	836	0	1353		XM_007218845.2	phospholipase D gamma 1 (LOC18786591), mRNA	1093	71.69	929	0	1387
	UN000873	XM_006844215.3	ABC transporter B family member 20 (LOC18434139), transcript variant X1, mRNA	1415	85.5	1276	0	2221		XM_009394425.2	ABC transporter B family member 20-like (LOC103978586), transcript variant X1, mRNA	1404	88.63	1275	0	2254		XM_020550329.1	ABC transporter B family member 20-like (LOC103650682), mRNA	1407	84.71	1275	0	2135		XM_010320964.2	ABC transporter B family member 6-like (LOC101265632), transcript variant X1, mRNA	1401	85.89	1276	0	2227		XM_002284187.4	ABC transporter B family member 20 (LOC100259831), mRNA	1410	87.6	1282	0	2264		XM_007220856.2	ABC transporter B family member 20 (LOC18784883), mRNA	1410	87.93	1276	0	2260
	UN000874	XM_011630744.2	protein NLP1-like (LOC18424659), mRNA	672	48.47	685	0	558		XM_018820118.1	protein NLP1-like (LOC103972125), transcript variant X1, mRNA	932	45.95	964	0	731		NM_001350274.1	NM_001350274.1 length 910 aa, 2733 bp, from 399..3131 of NM_001350274.1 Zea mays uncharacterized LOC100278991 (si614029b12), mRNA	910	44.61	807	0	604		XM_010322159.2	protein NLP4 (LOC101260431), transcript variant X1, mRNA	912	43.06	936	0	670		XM_010647578.2	protein NLP2 (LOC100267426), transcript variant X1, mRNA	947	48.69	955	0	784		XM_020563866.1	protein NLP5 (LOC18777244), transcript variant X1, mRNA	913	44.92	964	0	700
	UN000877	XM_006842668.3	phospholipid-transporting ATPase 3 (LOC18432562), transcript variant X1, mRNA	1226	85.01	1194	0	2026		XM_009411676.2	phospholipid-transporting ATPase 3-like (LOC103992087), mRNA	1237	85.13	1197	0	2009		XM_008666748.2	phospholipid-transporting ATPase 3 (LOC103643580), transcript variant X1, mRNA	1240	80.35	1186	0	1910		XM_004228317.3	phospholipid-transporting ATPase 3-like (LOC101243809), mRNA	1221	79.24	1190	0	1877		XM_010647906.2	phospholipid-transporting ATPase 3 (LOC100264484), mRNA	1222	86.29	1189	0	2031		XM_020566435.1	phospholipid-transporting ATPase 3 (LOC109949821), mRNA	1219	81.98	1193	0	1947
	UN000878	XM_020676656.1	large proline-rich protein BAG6 (LOC18424355), transcript variant X5, mRNA	958	53.78	489	6e-119	373		XM_009403617.2	large proline-rich protein BAG6 (LOC103985786), transcript variant X1, mRNA	1077	52.78	413	9e-112	357		XM_020551592.1	ubiquitin family protein (LOC100285089), transcript variant X1, mRNA	904	41.4	413	2e-74	253		XM_004238360.3	large proline-rich protein BAG6 (LOC101252683), transcript variant X3, mRNA	882	51.47	441	4e-107	340		XM_019222229.1	large proline-rich protein BAG6 (LOC100263131), transcript variant X5, mRNA	935	60.32	441	7e-138	422		XM_020564889.1	large proline-rich protein BAG6 (LOC18789503), transcript variant X2, mRNA	952	58.97	446	1e-137	421
	UN000879	XM_020662608.1	uncharacterized LOC18426598 (LOC18426598), mRNA	1175	58.6	1169	0	1132		XM_009412601.2	uncharacterized LOC103992762 (LOC103992762), transcript variant X1, mRNA	1180	57.16	1160	0	1057		XM_020539046.1	uncharacterized LOC100381615 (LOC100381615), transcript variant X1, mRNA	1141	50.85	1182	0	924		XM_010320238.2	uncharacterized LOC101260805 (LOC101260805), transcript variant X2, mRNA	1132	52.26	1194	0	986		XM_010656358.2	uncharacterized LOC100243006 (LOC100243006), mRNA	1176	61.16	1174	0	1186		XM_007217079.2	uncharacterized LOC18783073 (LOC18783073), transcript variant X1, mRNA	1126	57.68	1165	0	1130
	UN000881	XM_006844957.3	uncharacterized LOC18434896 (LOC18434896), mRNA	1210	37.24	435	3e-66	238		XM_009414254.2	uncharacterized LOC103994003 (LOC103994003), mRNA	1399	40.19	729	2e-146	463		XM_008658151.2	uncharacterized LOC103635772 (LOC103635772), transcript variant X1, mRNA	1856	38.45	502	1e-92	318		XM_004237616.3	uncharacterized LOC101249817 (LOC101249817), mRNA	1654	41.24	531	3e-104	350		XM_003633416.3	uncharacterized LOC100852955 (LOC100852955), transcript variant X3, mRNA	1859	49.53	527	3e-132	431		XM_020558192.1	uncharacterized LOC18785821 (LOC18785821), mRNA	1341	44.7	519	6e-112	369
	UN000882	XM_011629512.2	chromosomes protein 1 (LOC18446215), mRNA	1216	69.87	1218	0	1413		XM_009403343.2	structural maintenance of chromosomes protein 1 (LOC103985596), mRNA	1235	74.88	1218	0	1585		NM_001146808.1	NM_001146808.1 length 395 aa, 1188 bp, from 100..1287 of NM_001146808.1 Zea mays uncharacterized LOC100272324 (LOC100272324), mRNA	395	70.21	376	6e-123	385		XM_010324759.2	structural maintenance of chromosomes protein 1 (LOC100134876), mRNA	1218	67.98	1218	0	1393		XM_010654068.2	structural maintenance of chromosomes protein 1 (LOC100263447), transcript variant X1, mRNA	1218	74.14	1218	0	1560		XM_020569849.1	structural maintenance of chromosomes protein 1 (LOC18767976), mRNA	1218	72.33	1218	0	1477
	UN000883	XM_011631023.2	ethylene-overproduction protein 1 (LOC18425381), transcript variant X1, mRNA	916	70.95	933	0	1334		XM_018828068.1	ethylene-overproduction protein 1 (LOC103989702), transcript variant X2, mRNA	984	65.18	962	0	1194		XM_008656355.2	ethylene-overproduction protein 1 (LOC103634507), mRNA	968	56.72	975	0	1045		XM_004249019.3	ethylene-overproduction protein 1 (LOC101246576), mRNA	961	65.55	952	0	1245		XM_002269962.3	ethylene-overproduction protein 1 (LOC100264225), transcript variant X1, mRNA	955	69.46	966	0	1313		XM_007208314.2	ethylene-overproduction protein 1 (LOC18774016), mRNA	976	69.06	976	0	1326
	UN000884	XM_006858663.3	uncharacterized LOC18448602 (LOC18448602), transcript variant X1, mRNA	1189	66.51	651	0	956		XM_009408365.2	uncharacterized LOC103989501 (LOC103989501), transcript variant X1, mRNA	987	68.87	697	0	1050		XM_008672725.2	zinc ion binding (LOC103648233), mRNA	828	68.4	655	0	984		XM_004245746.3	uncharacterized LOC101264658 (LOC101264658), transcript variant X1, mRNA	811	71.31	697	0	1083		XM_002271130.3	uncharacterized LOC100264354 (LOC100264354), mRNA	965	73.56	696	0	1103		XM_020557691.1	uncharacterized LOC18770378 (LOC18770378), transcript variant X1, mRNA	1076	72.95	658	0	1040
	UN000885	XM_006840078.3	E3 ubiquitin-protein ligase HOS1 (LOC18429906), mRNA	1086	52.8	964	0	920		XM_009403360.2	E3 ubiquitin-protein ligase HOS1 (LOC103985609), mRNA	971	50.32	944	0	817		XM_008646299.2	E3 ubiquitin-protein ligase HOS1 (LOC103625902), mRNA	925	51.17	772	0	749		XM_010327199.2	ubiquitin-protein ligase-like protein (LOC100736471), mRNA	960	51.59	944	0	861		NM_001281085.1	NM_001281085.1 length 987 aa, 2964 bp, from 65..3028 of NM_001281085.1 Vitis vinifera E3 ubiquitin-protein ligase HOS1-like (LOC100241255), mRNA	987	55.66	945	0	974		XM_020563721.1	E3 ubiquitin-protein ligase HOS1 (LOC18776389), mRNA	999	51.89	952	0	884
	UN000886	XM_006845821.3	protein LONGIFOLIA 1 (LOC18435784), mRNA	1217	43.06	1110	0	564		XM_018824231.1	protein LONGIFOLIA 1 (LOC103982141), transcript variant X1, mRNA	1122	46.16	1159	0	739		XM_020540459.1	Protein LONGIFOLIA 2 (AY110473), transcript variant X2, mRNA	1088	36.26	1175	6e-140	451		XM_010320559.2	protein LONGIFOLIA 2 (LOC101257254), transcript variant X1, mRNA	1105	46.59	1159	0	758		XM_002265629.3	protein LONGIFOLIA 1 (LOC100253543), transcript variant X1, mRNA	1099	51.37	1164	0	894		XM_007210850.2	protein LONGIFOLIA 1 (LOC18776670), mRNA	1090	51.77	1157	0	885
	UN000887	XM_020675886.1	abnormal spindle-like microcephaly-associated protein (LOC18448021), mRNA	1299	45.52	960	0	741		XM_018827680.1	abnormal spindle-like microcephaly-associated protein homolog (LOC103989847), transcript variant X3, mRNA	1222	45.5	978	0	748		XM_008654930.2	abnormal spindle-like microcephaly-associated protein homolog (LOC103633234), mRNA	1447	37.26	1052	3e-171	547		XM_010318295.2	abnormal spindle-like microcephaly-associated protein homolog (LOC101256940), transcript variant X1, mRNA	1532	43.63	1398	0	1018		XM_010649000.2	abnormal spindle-like microcephaly-associated protein homolog (LOC100246947), mRNA	1452	51.51	1324	0	1196		XM_020561466.1	abnormal spindle-like microcephaly-associated protein homolog (LOC18780175), mRNA	1415	48.84	1296	0	1078
	UN000889	XM_020674197.1	BRCT domain-containing protein At4g02110 (LOC18445093), transcript variant X4, mRNA	1024	63.41	358	4e-163	482		XM_018829495.1	BRCT domain-containing protein At4g02110 (LOC103995312), transcript variant X3, mRNA	1119	75.59	299	3e-171	506		XM_008656571.2	uncharacterized protein (LOC103634545), transcript variant X5, mRNA	1373	55.25	362	3e-138	426		XM_010323571.1	BRCT domain-containing protein At4g02110 (LOC101248303), mRNA	1274	69.41	304	2e-160	482		XM_010653932.2	BRCT domain-containing protein At4g02110 (LOC100257310), transcript variant X2, mRNA	1153	79.68	310	0	548		XM_007199415.2	BRCT domain-containing protein At4g02110 (LOC18768500), mRNA	1235	65.08	358	2e-164	491
	UN000892	XM_006837072.3	pentatricopeptide repeat-containing protein At1g69290 (LOC18428032), transcript variant X1, mRNA	663	56.04	671	0	749		XM_009418292.2	pentatricopeptide repeat-containing protein At1g69290-like (LOC103997146), mRNA	668	63.61	643	0	820		XM_008676721.2	pentatricopeptide repeat-containing protein At1g69290-like (LOC103651122), mRNA	680	57.38	657	0	711		XM_010326827.2	pentatricopeptide repeat-containing protein At1g69290-like (LOC101250156), mRNA	654	64.2	662	0	844		XM_002274115.3	pentatricopeptide repeat-containing protein At1g69290 (LOC100247428), mRNA	662	68.44	659	0	919		XM_007225063.2	pentatricopeptide repeat-containing protein At1g69290 (LOC18790772), transcript variant X1, mRNA	659	67.47	661	0	901
	UN000893	XM_020676305.1	pentatricopeptide repeat-containing protein At1g06710, mitochondrial (LOC110008517), transcript variant X1, mRNA	1046	50.72	69	1e-06	52.8		---	---	0	---	---	---	---		---	---	0	---	---	---	---		---	---	0	---	---	---	---		---	---	0	---	---	---	---		---	---	0	---	---	---	---
	UN000894	XM_011630619.2	auxilin-related protein 2 (LOC18424183), mRNA	954	78.44	218	8e-95	296		XM_009385467.2	auxilin-related protein 2-like (LOC103971446), mRNA	954	74.31	218	1e-84	270		XM_008664388.2	auxilin-related protein 1 (LOC103640949), mRNA	899	76.71	219	9e-90	283		XM_004246195.3	auxilin-related protein 2 (LOC101246463), transcript variant X1, mRNA	921	75.93	216	3e-87	276		XM_002275730.4	auxilin-related protein 2 (LOC100247550), mRNA	949	80.28	218	2e-98	306		XM_020561575.1	auxilin-related protein 1 (LOC18781373), mRNA	986	75.12	217	1e-84	270
	UN000897	XM_006827534.3	uncharacterized LOC18422996 (LOC18422996), transcript variant X1, mRNA	931	31.19	824	1e-84	288		XM_009384077.2	uncharacterized LOC103970341 (LOC103970341), mRNA	926	32.79	793	4e-83	284		XM_008670810.2	Phosphatidylinositol N-acetyglucosaminlytransferase subunit P-related (LOC103646084), mRNA	862	33.33	207	2e-22	103		XM_010328151.2	uncharacterized LOC101249582 (LOC101249582), transcript variant X9, mRNA	959	33.2	753	1e-81	280		XM_002274859.4	uncharacterized LOC100258456 (LOC100258456), transcript variant X1, mRNA	979	33.57	828	2e-111	361		XM_020556922.1	uncharacterized LOC18786229 (LOC18786229), transcript variant X3, mRNA	959	35.67	726	3e-100	331
[truncated: 47,283 more rows]
[truncated: 12 more columns]

## Sheet: Table S3
	Table S3. Gene ontology-based functional characterization of the avocado UniGenes.
	Avocado UniGenes annotated like Arabidopsis homologs		Arabidopsis homolog (Locus)	Gene ontology-based functional characterization
	No. of UniGenes	UniGene Identifiers		Molecular Function		Biological Process		Cellular Component
				No. of GO-terms	GO-terms	No. of GO-terms	GO-terms	No. of GO-terms	GO-terms
[truncated: 13,810 more rows]

## Sheet: Table S4
		Table S4. KEGG-based pathways identified on avocado UniGenes.
[truncated: 3,766 more rows]

[truncated: 1 more sheets: Table S5]
