# Supplementary material for: Molecular evidence of the avocado defense response to Fusarium kuroshium infection: a deep transcriptome analysis using RNA-Seq
Source: PeerJ. 2021 Apr 14;9:e11215. doi: 10.7717/peerj.11215 (PMC8052963; doi:10.7717/peerj.11215)
Supplement: Supplemental Information 8 [file peerj-09-11215-s008.xlsx]

## Sheet: Table S6
	Table S6. Avocado differentially expressed genes. Differential expression analysis was done using DESeq package, which built-in procedures for the libraries normalization and estimation of variance. Three biological replicates (R1-R3) from each sample point (at 1, 4, 7 and 14 days post fungus inoculation [dpi]), were used (see Tables S1 for more details). In order to calculated the Fold Change (F…
	# of Cluster	UniGene Identifier	1-dpi		4-dpi		7-dpi		14-dpi			Arabidopsis thaliana based annotation
			Log2 (FC)	p-adj	Log2 (FC)	p-adj	Log2 (FC)	p-adj	Log2 (FC)	p-adj		Locus	Symbol	Description	Identity %	e-value
	1	UN021385	3.51918	0.000118071	0.81186	1	0.476277	1	-2.96279	1		AT1G12570.1	---	Glucose-methanol-choline (GMC) oxidoreductase family protein	60.67	5e-154
	1	UN034580	5.31028	6.55809e-06	4.04115	1	2.67707	0.201816	---	---		AT5G17480.1	APC1, PC1	pollen calcium-binding protein 1	54.76	3e-09
	1	UN047607	4.25905	0.270381	2.09737	1	3.74606	1	-5.43143	0.000456183		---	---	---	---	---
	1	UN008334	3.25846	0.00108518	2.51329	0.120442	2.76675	0.00137187	-1.47519	1		AT3G01420.1	ALPHA-DOX1, DOX1, DIOX1, PADOX-1	Peroxidase superfamily protein	70.03	0
	1	UN020033	1.39959	0.00648834	1.61865	0.597584	1.12092	0.740857	-1.15561	1		AT5G04760.1	---	Duplicated homeodomain-like superfamily protein	77.53	7e-43
	1	UN031361	3.87914	7.04671e-06	2.27267	0.0769893	2.7932	0.202163	-3.6962	1		AT2G22850.1	AtbZIP6, bZIP6	basic leucine-zipper 6	48.84	8e-19
	1	UN028801	4.17942	0.600413	2.74293	1	3.62856	0.00503427	-3.33752	0.190541		AT3G12670.1	emb2742	CTP synthase family protein	75.55	2e-172
	1	UN053529	2.62187	0.00569664	1.98683	1	2.6903	0.917919	-2.57701	1		AT3G12500.1	ATHCHIB, PR3, PR-3, CHI-B, B-CHI, HCHIB	basic chitinase	67.33	2e-47
	1	UN006144	2.73585	0.0313908	1.95053	1	0.765404	1	-2.11496	1		AT2G30070.1	ATKT1, ATKT1P, ATKUP1, KUP1, KT1	potassium transporter 1	40.03	1e-166
	1	UN006798	3.02497	3.46945e-10	2.03015	0.0322206	0.885058	1	-2.44915	1		AT1G60190.1	---	ARM repeat superfamily protein	42.66	1e-157
	1	UN015382	1.81627	0.000190559	1.3905	0.664264	-0.0782179	1	-1.36861	1		AT5G41920.1	---	GRAS family transcription factor	36.36	4e-54
	1	UN009664	2.63966	1.29339e-07	3.15374	6.97215e-08	0.519717	1	-3.63051	1		AT1G48100.1	---	Pectin lyase-like superfamily protein	71.39	0
	1	UN023143	1.58577	0.00089528	1.76083	0.508738	0.512878	1	-2.00143	1		AT4G21510.1	---	F-box family protein	42.5	1e-27
	1	UN054625	2.04678	0.029829	2.30821	0.0280049	0.260437	1	-1.89073	1		AT2G37170.1	PIP2B, PIP2;2	plasma membrane intrinsic protein 2	91.34	8e-80
	1	UN006540	2.5676	0.00119205	0.258368	1	1.66237	0.38016	-1.37154	1		AT1G60190.1	---	ARM repeat superfamily protein	41.9	1e-53
	1	UN021741	4.74934	0.0748203	0.140807	1	1.59124	1	-3.50887	0.000790999		AT5G13410.1	---	FKBP-like peptidyl-prolyl cis-trans isomerase family protein	73.24	2e-110
	1	UN063287	2.97901	0.00357175	0.852211	1	1.88586	0.723966	---	---		AT2G33590.1	---	NAD(P)-binding Rossmann-fold superfamily protein	52.21	1e-31
	1	UN031736	6.51197	8.30506e-07	2.11313	1	---	---	-0.757232	1		AT1G62660.1	---	Glycosyl hydrolases family 32 protein	73.98	3e-104
	1	UN004738	6.73348	5.67035e-08	---	---	---	---	-0.589809	1		AT2G42520.1	---	P-loop containing nucleoside triphosphate hydrolases superfamily protein	86.59	0
	1	UN027288	8.37585	0.0106085	-0.170545	1	-1.3316	1	2.42788	1		AT1G24260.2	SEP3, AGL9	K-box region and MADS-box transcription factor family protein	69.8	6e-115
	1	UN037875	4.98026	0.0325503	-0.092303	1	-0.736704	1	1.5057	1		AT3G17240.1	mtLPD2	lipoamide dehydrogenase 2	87.5	2e-15
	1	UN025376	5.21664	0.0116093	0.715235	1	-1.56606	1	-0.255942	1		---	---	---	---	---
	1	UN023848	5.24608	0.0123619	---	---	---	---	1.73657	0.80771		AT5G13930.1	CHS, TT4, ATCHS	Chalcone and stilbene synthase family protein	87.01	1e-153
	1	UN014144	3.79434	0.00145111	-0.125707	1	0.727409	1	0.0567275	1		AT1G15520.1	PDR12, ATPDR12, ABCG40, ATABCG40	pleiotropic drug resistance 12	69.79	0
	1	UN021723	5.40905	0.00554169	-0.21848	1	0.40754	1	0.726673	1		AT4G18960.1	AG	K-box region and MADS-box transcription factor family protein	69.36	4e-112
	1	UN023680	6.48835	1.61092e-11	-2.21848	1	0.169751	1	0.055468	1		AT4G18960.1	AG	K-box region and MADS-box transcription factor family protein	69.36	9e-113
	1	UN029174	6.10621	0.0361797	-1.71217	1	0.360541	1	-0.0889112	1		AT4G11650.1	ATOSM34, OSM34	osmotin 34	69.12	8e-100
	1	UN026666	5.14085	0.0188254	0.247031	1	0.492556	1	-2.12754	0.721443		AT5G52980.1	---	CONTAINS InterPro DOMAIN/s: ATPase, vacuolar ER assembly factor, Vma12 (InterPro:IPR021013); Has 1807 Blast hits to 1807 proteins in 277 species: Archae - 0; Bacteria - 0; Metazoa - 736; Fungi - 347; Plants - 385; Viruses - 0; Other Eukaryotes - 339 (source: NCBI BLink).	64.41	2e-67
	1	UN012183	5.77262	0.000646063	-0.755508	1	---	---	-0.999841	1		AT3G19270.1	CYP707A4	cytochrome P450, family 707, subfamily A, polypeptide 4	71.17	0
	1	UN023228	3.40743	0.0345973	-0.290526	1	1.28397	0.920493	-0.295978	1		AT1G70170.1	MMP	matrix metalloproteinase	46.5	3e-74
	1	UN002694	5.59484	0.00141774	0.669471	1	2.07611	1	-1.24174	0.500831		AT3G49730.1	---	Tetratricopeptide repeat (TPR)-like superfamily protein	68.08	0
	1	UN007723	3.26365	5.70769e-09	0.508183	1	1.3874	0.909372	-0.0893323	1		AT1G22360.1	AtUGT85A2, UGT85A2	UDP-glucosyl transferase 85A2	61.59	0
	1	UN020619	4.07088	2.75487e-07	0.866003	1	1.53916	1	0.28901	1		AT3G01670.1	---	unknown protein; BEST Arabidopsis thaliana protein match is: unknown protein (TAIR:AT3G01680.1); Has 121 Blast hits to 111 proteins in 12 species: Archae - 0; Bacteria - 0; Metazoa - 0; Fungi - 0; Plants - 121; Viruses - 0; Other Eukaryotes - 0 (source: NCBI BLink).	42.98	6e-89
	1	UN050594	2.68784	0.000615439	0.734843	1	1.06207	1	0.071773	1		AT2G33600.1	---	NAD(P)-binding Rossmann-fold superfamily protein	57.14	6e-14
	1	UN028173	3.87825	6.51353e-08	0.727621	1	0.963926	0.94665	0.276566	1		AT3G25400.1	---	CONTAINS InterPro DOMAIN/s: NTP Pyrophosphohydrolase MazG-related, RS21-C6 (InterPro:IPR011394), EAR (InterPro:IPR009039), NTP pyrophosphohydrolase MazG, putative catalytic core (InterPro:IPR004518); Has 1123 Blast hits to 1121 proteins in 452 species: Archae - 22; Bacteria - 753; Metazoa - 81; Fungi - 3; Plants - 83; Viruses - 0; Other Eukaryotes - 181 (source: NCBI BLink).	80	2e-48
	1	UN020374	5.59523	0.00200989	0.829455	1	---	---	-0.558934	1		AT1G60060.1	---	Serine/threonine-protein kinase WNK (With No Lysine)-related	63.38	5e-147
	1	UN066351	3.64147	0.0135138	0.587265	1	0.712445	1	-0.34685	1		AT2G29420.1	ATGSTU7, GST25, GSTU7	glutathione S-transferase tau 7	65.56	3e-40
	1	UN004495	3.11178	1.95443e-06	0.603344	1	-0.339257	1	-0.888917	0.808638		AT2G19130.1	---	S-locus lectin protein kinase family protein	52.9	0
	1	UN028790	4.9871	0.0314347	0.7062	1	-1.19418	1	-1.44575	1		AT3G07510.1	---	unknown protein; BEST Arabidopsis thaliana protein match is: unknown protein (TAIR:AT2G01580.1); Has 133 Blast hits to 133 proteins in 14 species: Archae - 0; Bacteria - 4; Metazoa - 0; Fungi - 0; Plants - 129; Viruses - 0; Other Eukaryotes - 0 (source: NCBI BLink).	81.48	7e-54
	1	UN033794	4.77849	0.0459122	0.311997	1	-0.598696	1	---	---		AT4G33720.1	---	CAP (Cysteine-rich secretory proteins, Antigen 5, and Pathogenesis-related 1 protein) superfamily protein	60.62	2e-66
	1	UN017678	5.18693	1.31561e-07	1.26406	1	-1.1452	1	-0.978802	1		AT2G43870.1	---	Pectin lyase-like superfamily protein	56.28	2e-161
	1	UN020786	2.98879	0.00480479	1.85929	0.0955905	-0.221236	1	-0.654984	1		AT4G04220.1	AtRLP46, RLP46	receptor like protein 46	51.01	4e-78
	1	UN032552	5.27635	1.18114e-10	2.36771	1	-0.176244	1	-1.03933	1		AT4G33720.1	---	CAP (Cysteine-rich secretory proteins, Antigen 5, and Pathogenesis-related 1 protein) superfamily protein	62.5	3e-70
	1	UN008273	3.24165	0.0036515	0.747809	1	-0.210549	1	-1.78086	1		AT1G65890.1	AAE12	acyl activating enzyme 12	60	0
	1	UN010374	4.98492	0.033987	2.04274	1	0.925485	1	-1.87858	1		AT1G47670.1	---	Transmembrane amino acid transporter family protein	65.94	0
	1	UN031866	2.41623	2.97416e-07	1.03026	0.572825	0.433928	1	-1.21362	1		AT1G51090.1	---	Heavy metal transport/detoxification superfamily protein	42.62	4e-09
	1	UN014283	2.79244	0.00627378	0.714535	1	0.5146	1	-0.612419	1		AT1G62710.1	BETA-VPE, BETAVPE	beta vacuolar processing enzyme	68.76	0
	1	UN015379	4.50473	0.00862715	2.8607	1	-2.49013	1	-2.00237	1		AT1G19250.1	FMO1	flavin-dependent monooxygenase 1	43.65	3e-34
	1	UN012140	3.40472	0.0132819	1.25041	1	-1.4238	1	-0.492628	1		AT5G17540.1	---	HXXXD-type acyl-transferase family protein	56.11	5e-163
	1	UN004140	3.05792	0.0257926	4.62873	1	-0.375613	1	0.161871	1		AT2G20880.1	---	Integrase-type DNA-binding superfamily protein	71.7	8e-45
	1	UN006571	4.76796	8.02348e-07	5.76595	4.85889e-28	-0.519103	1	0.125727	1		AT3G14440.1	NCED3, ATNCED3, STO1, SIS7	nine-cis-epoxycarotenoid dioxygenase 3	72.8	0
	1	UN007816	3.60243	3.85412e-05	4.56731	1	-0.259786	1	0.133669	1		AT5G51760.1	AHG1	Protein phosphatase 2C family protein	54.78	7e-97
	1	UN009603	1.4627	0.149705	3.35766	2.34797e-05	-1.01681	1	-0.317384	1		AT5G48380.1	BIR1	BAK1-interacting receptor-like kinase 1	69.15	3e-179
	1	UN012050	2.41495	0.0712561	5.96354	0.00157587	-1.02115	1	0.46685	1		AT3G06020.1	---	Protein of unknown function (DUF3049)	41.05	5e-11
	1	UN004871	2.50693	1	6.34155	8.12023e-05	-1.16132	1	-0.225799	1		AT1G79730.1	ELF7	hydroxyproline-rich glycoprotein family protein	65.83	8e-149
	1	UN027802	2.13419	0.609388	5.45162	0.0255147	-0.494128	1	-0.0101232	1		AT4G36380.1	ROT3	Cytochrome P450 superfamily protein	66.52	3e-107
	1	UN018396	2.24966	0.00924672	3.02079	1	-1.10441	1	-0.198387	1		AT5G56340.1	ATCRT1	RING/U-box superfamily protein	63.06	1e-61
	1	UN002706	5.277	0.00881227	5.36705	0.0460839	-2.35863	1	1.11526	1		AT5G26860.1	LON_ARA_ARA, LON1	lon protease 1	75.29	0
	1	UN012867	5.94159	0.000186086	4.15138	1	---	---	0.106807	1		AT5G15790.1	---	RING/U-box superfamily protein	45.91	3e-59
	1	UN016843	5.41466	0.00551684	3.45395	1	-2.69255	1	0.293933	1		AT1G21651.1	---	zinc ion binding	51.27	7e-110
	1	UN012877	2.44164	1.4887e-07	1.87185	0.311865	-1.07254	0.365552	-0.143117	1		AT2G38640.1	---	Protein of unknown function (DUF567)	52.5	1e-63
	1	UN010627	3.30652	1.30568e-10	2.16494	0.37177	-1.16012	0.733213	-0.456527	1		AT3G47500.1	CDF3	cycling DOF factor 3	34.69	1e-48
	1	UN020213	2.43169	8.40501e-06	1.69336	0.300022	-1.06877	0.362493	-0.360389	1		AT4G24240.1	WRKY7, ATWRKY7	WRKY DNA-binding protein 7	38.36	1e-06
	1	UN006826	2.67819	1.11871e-18	1.34283	0.0424807	-0.664346	1	-0.0686924	1		AT1G19900.1	---	glyoxal oxidase-related protein	60.15	0
	1	UN012738	2.68376	8.11831e-22	1.40171	0.0799551	-0.589691	1	-0.435962	1		AT4G22710.1	CYP706A2	cytochrome P450, family 706, subfamily A, polypeptide 2	38.61	4e-30
	1	UN015920	4.46051	0.0238575	2.32069	0.843763	-0.991492	1	-0.619292	1		AT1G28220.1	ATPUP3, PUP3	purine permease 3	46.01	7e-100
	1	UN011745	5.32307	3.80581e-08	2.66589	0.192214	-1.26953	1	-1.18434	1		AT3G26310.1	CYP71B35	cytochrome P450, family 71, subfamily B, polypeptide 35	48.67	3e-154
	1	UN042020	5.97907	3.29105e-57	2.88499	0.0388297	-1.28884	1	-1.07626	1		AT5G52390.1	---	PAR1 protein	69.05	2e-37
	1	UN017057	6.04358	8.22855e-05	6.18179	0.000158795	-1.34366	0.344971	-0.27206	1		---	---	---	---	---
	1	UN005334	3.95793	3.54314e-06	2.70735	1	-0.774954	1	0.0419576	1		AT3G25620.2	---	ABC-2 type transporter family protein	62.72	0
	1	UN013388	2.06377	0.000630475	1.42763	0.351484	-0.450306	1	-0.26181	1		AT1G30080.1	---	Glycosyl hydrolase superfamily protein	64.99	2e-166
	1	UN006077	5.11717	0.0187465	3.76805	1	-0.466098	1	-0.609416	1		AT5G22820.2	---	ARM repeat superfamily protein	42.88	1e-107
	1	UN007855	5.89832	0.000255463	---	---	---	---	-1.23556	1		AT3G24650.1	ABI3, SIS10	AP2/B3-like transcriptional factor family protein	45.11	3e-115
	1	UN005196	---	---	7.33623	0.000678622	---	---	-0.346684	1		AT1G78570.1	RHM1, ROL1, ATRHM1	rhamnose biosynthesis 1	87.71	0
	1	UN011829	2.70312	5.17067e-21	1.49	0.258721	-0.823029	0.808183	-1.51901	1		---	---	---	---	---
	1	UN012048	1.94404	0.00345474	1.46369	0.428674	-0.340103	1	-1.22371	0.971994		AT3G14610.1	CYP72A7	cytochrome P450, family 72, subfamily A, polypeptide 7	49.04	1e-72
	1	UN017808	3.56647	0.303251	2.37997	0.422734	0.375315	1	-1.58383	0.0355621		AT3G57270.1	BG1	beta-1,3-glucanase 1	51.26	2e-104
	1	UN023451	2.00819	0.0238488	1.30104	1	-0.0588997	1	-0.863243	1		AT5G54980.1	---	Uncharacterised protein family (UPF0497)	46.39	7e-41
	1	UN008807	3.39075	2.66206e-19	1.64626	0.623129	-0.372839	1	-1.5321	1		AT4G20050.1	QRT3	Pectin lyase-like superfamily protein	64.02	0
	1	UN008473	3.09438	2.78319e-13	1.93176	1	-0.161175	1	-1.83404	1		AT3G07250.1	---	nuclear transport factor 2 (NTF2) family protein / RNA recognition motif (RRM)-containing protein	70.77	1e-28
	1	UN031141	3.09359	4.8028e-12	1.66456	1	0.111287	1	-2.07634	1		AT3G57450.1	---	unknown protein; Has 65 Blast hits to 65 proteins in 11 species: Archae - 0; Bacteria - 0; Metazoa - 0; Fungi - 0; Plants - 65; Viruses - 0; Other Eukaryotes - 0 (source: NCBI BLink).	84.85	9e-17
	1	UN020536	1.84664	0.0204692	1.96744	0.235865	-0.254732	1	-0.958802	1		AT4G36990.1	HSF4, HSFB1, AT-HSFB1, ATHSF4	heat shock factor 4	51.39	3e-67
	1	UN012892	4.92572	0.0395802	4.45621	0.628362	-0.104033	1	-2.75767	0.978591		AT3G52260.3	---	Pseudouridine synthase family protein	58.09	2e-90
	1	UN024330	6.95442	0.0188244	6.6266	0.120442	-0.0158058	1	-3.05472	1		AT4G18910.1	NIP1;2, NLM2, ATNLM2	NOD26-like intrinsic protein 1;2	65.06	5e-117
	1	UN017611	3.01262	0.00137124	3.13704	1	-0.109044	1	-0.477816	1		---	---	---	---	---
	1	UN070834	3.81401	0.00756995	3.85581	0.709293	0.595715	1	-0.962499	1		AT1G76470.1	---	NAD(P)-binding Rossmann-fold superfamily protein	47.42	8e-26
	1	UN017943	3.90453	0.253931	4.33193	0.0135893	4.06624	0.469069	0.575078	1		AT5G24580.1	---	Heavy metal transport/detoxification superfamily protein	68.15	3e-73
	1	UN019013	3.96835	6.55235e-10	4.94333	1.33519e-19	4.35442	6.14147e-20	1.40323	1		AT3G12670.1	emb2742	CTP synthase family protein	72.09	3e-85
	1	UN022816	2.47417	0.00718264	3.19047	0.00518177	2.46249	0.106933	-0.209044	1		AT5G02020.1	SIS	Encodes a protein involved in salt tolerance, names SIS (Salt Induced Serine rich).	35.2	2e-15
	1	UN011250	2.58471	5.54703e-15	3.00775	0.0492446	2.75362	0.0248635	-0.0716643	1		AT1G14190.1	---	Glucose-methanol-choline (GMC) oxidoreductase family protein	52.76	2e-156
	1	UN027301	1.96915	0.103172	2.47143	0.000948307	2.36152	0.645523	-0.000452944	1		AT3G26430.1	---	GDSL-like Lipase/Acylhydrolase superfamily protein	60.13	3e-124
	1	UN025088	3.61354	0.965879	4.91605	0.209376	6.31093	3.55378e-05	0.286784	1		AT1G14550.1	---	Peroxidase superfamily protein	69.1	6e-146
	1	UN002355	2.51163	0.0732288	5.76786	2.19711e-14	5.44926	3.74378e-39	-0.510111	1		AT4G01970.1	AtSTS, STS	stachyose synthase	60	0
	1	UN004034	3.01418	1	6.53597	0.00540576	6.7808	4.027e-08	-0.876743	1		AT4G01970.1	AtSTS, STS	stachyose synthase	51.49	0
	1	UN011170	0.784043	1	1.60168	1	1.38755	0.020583	-0.342858	1		AT5G24530.1	DMR6	2-oxoglutarate (2OG) and Fe(II)-dependent oxygenase superfamily protein	65.97	2e-169
	1	UN029120	2.97459	0.0120924	4.6335	1.25081e-05	4.9078	6.72853e-18	-0.69609	1		AT3G12670.1	emb2742	CTP synthase family protein	76.51	2e-174
	1	UN007149	1.40773	1	3.04003	0.267504	3.02781	0.00440273	1.29058	1		AT1G42430.1	---	unknown protein; BEST Arabidopsis thaliana protein match is: unknown protein (TAIR:AT3G55760.3); Has 186 Blast hits to 143 proteins in 47 species: Archae - 0; Bacteria - 23; Metazoa - 14; Fungi - 6; Plants - 87; Viruses - 0; Other Eukaryotes - 56 (source: NCBI BLink).	76.47	0
	1	UN010054	0.913629	0.307722	2.24849	0.00531086	1.92311	0.00274881	0.154016	1		AT5G62890.1	---	Xanthine/uracil permease family protein	81.1	0
	1	UN005627	1.01117	0.563061	1.95843	0.41656	1.78292	0.0383957	0.435933	1		AT1G10090.1	---	Early-responsive to dehydration stress protein (ERD4)	58.12	0
	1	UN013989	1.30353	0.270179	2.11804	0.579596	2.04504	0.000171106	0.399433	1		AT5G24530.1	DMR6	2-oxoglutarate (2OG) and Fe(II)-dependent oxygenase superfamily protein	60	3e-154
	1	UN040357	1.40765	0.869388	2.55611	0.352152	2.23322	0.00780724	0.404164	1		AT3G26430.1	---	GDSL-like Lipase/Acylhydrolase superfamily protein	48.68	5e-53
	1	UN006720	1.33645	0.002748	2.07636	0.0537173	1.19704	0.135833	-0.554644	1		AT1G62660.1	---	Glycosyl hydrolases family 32 protein	66.24	0
	1	UN010656	3.70301	0.921251	5.06762	0.151052	3.41025	0.0124903	-1.27615	1		AT1G07430.1	HAI2	highly ABA-induced PP2C gene 2	53.85	2e-75
	1	UN021222	1.80387	0.00215929	2.0402	0.0285738	0.851669	0.433835	-0.585102	1		AT4G28940.1	---	Phosphorylase superfamily protein	62.04	6e-148
	1	UN003627	1.33147	0.0338625	1.48662	1	0.715971	0.914856	-0.180514	1		AT1G71070.1	---	Core-2/I-branching beta-1,6-N-acetylglucosaminyltransferase family protein	51.63	3e-115
	1	UN008864	3.19391	1.46398e-17	3.02227	0.0117608	1.29682	0.317553	-0.573292	1		AT4G02290.1	AtGH9B13, GH9B13	glycosyl hydrolase 9B13	64.49	0
	1	UN017429	3.47467	7.38266e-09	3.38533	1	1.62002	0.823399	-0.513678	1		AT1G80160.1	---	Lactoylglutathione lyase / glyoxalase I family protein	70.27	2e-77
	1	UN023205	3.10675	0.00139709	3.12024	0.000112641	1.08013	1	-0.0175314	1		AT4G14746.1	---	CONTAINS InterPro DOMAIN/s: EGF-like (InterPro:IPR006210); Has 259 Blast hits to 234 proteins in 55 species: Archae - 0; Bacteria - 0; Metazoa - 184; Fungi - 0; Plants - 69; Viruses - 0; Other Eukaryotes - 6 (source: NCBI BLink).	46.85	5e-41
	1	UN030371	5.90791	0.000141735	5.50128	0.0265032	2.16686	1	-0.377382	1		AT4G18910.1	NIP1;2, NLM2, ATNLM2	NOD26-like intrinsic protein 1;2	65.46	1e-117
	1	UN010425	7.04358	5.83998e-10	7.38955	7.66824e-11	---	---	-0.833636	0.924196		AT1G78800.1	---	UDP-Glycosyltransferase superfamily protein	73.63	0
	1	UN034166	5.60298	0.00135012	5.85767	0.134832	1.66695	1	---	---		AT4G18910.1	NIP1;2, NLM2, ATNLM2	NOD26-like intrinsic protein 1;2	63.55	4e-94
	1	UN016835	0.905282	1	2.24815	5.04444e-08	0.720126	0.77067	0.481411	1		AT4G14900.1	---	FRIGIDA-like protein	65.76	1e-160
	1	UN005574	2.68793	1.76554e-10	4.48998	1.11529e-21	1.91133	1	-0.0980149	1		AT1G60420.1	---	DC1 domain-containing protein	41.6	7e-94
	1	UN022180	1.36961	0.0114561	2.32204	0.119223	0.847531	1	-0.269484	1		AT1G76690.1	OPR2, ATOPR2	12-oxophytodienoate reductase 2	68.06	0
	1	UN017912	2.94408	9.28378e-14	4.78839	0.311865	2.67233	4.31471e-13	0.325343	1		AT2G47180.1	AtGolS1, GolS1	galactinol synthase 1	73.91	0
	1	UN028569	0.907969	0.143032	1.86211	0.0154389	0.93108	1	0.504195	1		AT1G33920.1	ATPP2-A4, PP2-A4	phloem protein 2-A4	32.3	4e-24
	1	UN017851	2.24485	2.63219e-05	3.01334	2.52479e-07	1.16346	0.289412	0.281895	1		AT1G45249.3	ABF2	abscisic acid responsive elements-binding factor 2	49.61	2e-84
	1	UN021010	2.56517	0.0447115	3.83639	0.000539592	1.68045	0.749441	0.673129	1		AT1G60940.1	SNRK2-10, SNRK2.10, SRK2B	SNF1-related protein kinase 2.10	74.84	0
	1	UN030066	4.13759	0.741472	5.63883	0.011723	2.81308	1	1.28485	0.776739		AT2G28370.1	---	Uncharacterised protein family (UPF0497)	72.63	3e-75
	1	UN009318	3.39635	0.000134796	4.23037	0.00103747	1.42024	0.986285	1.02405	1		AT1G60420.1	---	DC1 domain-containing protein	42.65	5e-54
	1	UN036938	2.24006	1.80496e-05	2.9264	5.04444e-08	0.613438	0.901078	---	---		AT3G54820.1	PIP2D, PIP2;5	plasma membrane intrinsic protein 2;5	84.85	1e-35
	1	UN023939	4.76065	0.0775741	5.50021	0.0159562	---	---	0.329881	1		AT3G60670.1	---	PLATZ transcription factor family protein	53.49	4e-67
	1	UN011570	2.85135	0.0786683	3.30385	0.0137679	0.509884	1	---	---		AT1G48100.1	---	Pectin lyase-like superfamily protein	61.01	1e-160
	1	UN003220	1.9226	0.576995	0.299089	1	1.87688	0.0110027	0.0988755	1		AT3G14470.1	---	NB-ARC domain-containing disease resistance protein	40.24	0
	1	UN003801	6.91442	4.39571e-09	-0.133444	1	7.58456	5.91687e-14	-0.688082	1		AT3G19895.1	---	RING/U-box superfamily protein	63.21	0
	1	UN009755	3.79649	0.000801024	0.713957	1	3.38637	0.227733	-1.03347	0.983226		AT4G16740.1	ATTPS03, TPS03	terpene synthase 03	42.44	5e-154
	1	UN014192	3.17033	5.86326e-07	0.430311	1	2.33966	0.0146562	-0.870494	1		AT5G51970.1	---	GroES-like zinc-binding alcohol dehydrogenase family protein	77.2	0
	1	UN005692	2.25839	3.28264e-06	0.433492	1	1.78057	0.0674117	-0.0821682	1		AT1G61120.1	TPS04, GES, TPS4	terpene synthase 04	40.9	8e-104
	1	UN009174	3.46046	0.862602	1.22617	1	2.48432	0.0147737	-0.0523577	1		AT5G57580.1	---	Calmodulin-binding protein	37.35	5e-59
	1	UN028279	2.80727	3.1482e-15	1.09532	0.717992	1.90118	0.0129479	0.0313723	1		AT2G01300.1	---	unknown protein; BEST Arabidopsis thaliana protein match is: unknown protein (TAIR:AT1G15010.1); Has 73 Blast hits to 73 proteins in 12 species: Archae - 0; Bacteria - 0; Metazoa - 0; Fungi - 0; Plants - 73; Viruses - 0; Other Eukaryotes - 0 (source: NCBI BLink).	60.22	3e-36
	1	UN032391	3.0275	0.022484	0.226274	1	2.02374	0.45837	0.386104	1		---	---	---	---	---
	1	UN016693	6.09638	0.270179	2.93251	1	6.78283	1.91775e-07	-0.144773	1		---	---	---	---	---
	1	UN005780	2.10959	0.00582461	0.941913	1	2.19178	0.00383879	-0.507421	1		AT5G60900.1	RLK1	receptor-like protein kinase 1	37.16	2e-159
	1	UN017823	1.87773	0.0107032	1.12397	1	1.74363	0.782899	-0.719587	1		AT5G20885.1	---	RING/U-box superfamily protein	41.62	5e-30
	1	UN018860	6.6418	0.0494189	3.81174	1	6.12637	0.402896	-1.67121	1		AT1G14190.1	---	Glucose-methanol-choline (GMC) oxidoreductase family protein	71.05	4e-30
	1	UN022713	5.12892	0.514231	2.78786	1	4.2189	0.0168896	-0.904804	1		---	---	---	---	---
	1	UN040254	1.59552	0.0127847	0.880791	1	1.31078	0.355166	-0.34685	1		---	---	---	---	---
	1	UN020612	2.78204	1.03191e-05	1.48724	1	1.69523	0.475545	0.673601	1		AT1G80160.1	---	Lactoylglutathione lyase / glyoxalase I family protein	72.41	3e-42
	1	UN029811	2.56191	0.0101526	1.9116	1	2.03702	1	0.936492	1		AT3G12500.1	ATHCHIB, PR3, PR-3, CHI-B, B-CHI, HCHIB	basic chitinase	73.4	4e-113
	1	UN004333	6.2288	1.5971e-05	5.40436	0.0358067	5.53633	0.00440273	0.196648	1		AT3G12560.1	TRFL9, ATTBP2	TRF-like 9	42.03	4e-127
	1	UN005567	1.68267	0.188456	1.24974	0.25628	1.40996	0.00931471	0.0718336	1		AT3G12670.1	emb2742	CTP synthase family protein	80.03	0
	1	UN013987	2.60225	7.19559e-06	1.86619	0.0211525	2.35412	0.0177557	0.159411	1		AT4G38810.2	---	Calcium-binding EF-hand family protein	64.72	1e-163
	1	UN014657	2.95989	6.23561e-06	1.81982	1	2.60295	0.396258	-0.00686259	1		AT1G10430.1	PP2A-2	protein phosphatase 2A-2	92.13	0
	1	UN000802	1.57271	0.0445768	1.22852	1	0.897449	0.967229	-0.13077	1		AT1G02520.1	PGP11	P-glycoprotein 11	66.59	0
	1	UN009726	2.32904	0.00288906	2.2181	0.000539592	1.27307	0.849701	-0.103548	1		AT3G18830.1	ATPLT5, PMT5, ATPMT5	polyol/monosaccharide transporter 5	65.05	0
	1	UN015506	1.89809	5.68037e-09	1.72417	1	1.26483	0.130445	0.0835346	1		AT1G22360.1	AtUGT85A2, UGT85A2	UDP-glucosyl transferase 85A2	60.44	0
	1	UN020461	2.27538	1.30051e-09	2.04352	0.273606	1.3731	0.553582	0.0506909	1		AT2G46680.1	ATHB-7, ATHB7, HB-7	homeobox 7	45.09	2e-38
	1	UN014972	5.52605	1.2455e-05	3.13998	1	1.31871	1	-0.589736	1		AT3G29575.1	AFP3	ABI five binding protein 3	70.42	6e-31
	1	UN017169	4.04979	0.000795709	2.1759	1	1.41842	1	-0.263997	1		AT3G08030.1	---	Protein of unknown function, DUF642	69.64	2e-170
	1	UN023860	3.20541	6.64077e-20	1.65824	0.183141	0.913907	1	-0.217016	1		---	---	---	---	---
	1	UN006020	5.66069	2.45764e-05	4.11756	1	1.63809	1	-0.339479	1		AT1G32450.1	NRT1.5	nitrate transporter 1.5	69.18	0
	1	UN025652	2.76645	0.00509086	1.89881	0.483366	1.05134	1	-0.520211	1		AT3G56060.1	---	Glucose-methanol-choline (GMC) oxidoreductase family protein	52.94	4e-75
	1	UN027169	2.5928	3.43691e-07	1.90994	0.000112641	0.601463	1	-0.775407	1		AT1G65680.1	ATEXPB2, EXPB2, ATHEXP BETA 1.4	expansin B2	63.89	1e-92
	1	UN010775	4.55801	0.00154467	2.15592	0.795295	2.17828	0.295241	-0.817763	1		AT2G22240.1	ATMIPS2, MIPS2, ATIPS2	myo-inositol-1-phosphate synthase 2	89.61	0
	1	UN012909	3.09052	0.000801024	1.66846	1	1.34625	1	-1.15256	1		AT2G29090.1	CYP707A2	cytochrome P450, family 707, subfamily A, polypeptide 2	70.21	0
	1	UN029799	2.23709	2.32744e-07	1.11462	1	0.733252	1	-0.518116	1		AT1G35210.1	---	unknown protein; FUNCTIONS IN: molecular_function unknown; INVOLVED IN: biological_process unknown; LOCATED IN: chloroplast; EXPRESSED IN: 14 plant structures; EXPRESSED DURING: 9 growth stages; CONTAINS InterPro DOMAIN/s: Protein of unknown function DUF740 (InterPro:IPR008004); BEST Arabidopsis thaliana protein match is: unknown protein (TAIR:AT1G22470.1); Has 83 Blast hits to 83 proteins in 12 …	86.36	5e-08
	1	UN029895	2.6197	0.0455649	2.14645	0.584696	1.3593	0.179537	-0.914465	1		AT3G04720.1	PR4, HEL, PR-4	pathogenesis-related 4	79.51	6e-70
	1	UN032806	2.99273	3.27801e-06	1.95522	0.286553	1.34849	0.404908	-0.892872	1		AT2G22250.2	ATAAT, AAT, MEE17	aspartate aminotransferase	80.58	2e-147
	1	UN024968	5.72302	8.17794e-20	2.43263	1	2.49518	0.316373	0.344247	1		AT1G08080.1	ATACA7, ACA7	alpha carbonic anhydrase 7	49.19	6e-78
	1	UN032334	2.52782	0.0240691	1.05466	1	0.314985	1	-0.35818	1		AT4G21215.2	---	unknown protein; Has 35333 Blast hits to 34131 proteins in 2444 species: Archae - 798; Bacteria - 22429; Metazoa - 974; Fungi - 991; Plants - 531; Viruses - 0; Other Eukaryotes - 9610 (source: NCBI BLink).	53.57	2e-10
	1	UN006583	7.02586	1.17597e-07	2.86696	0.334687	1.40136	1	-1.24136	1		AT3G14440.1	NCED3, ATNCED3, STO1, SIS7	nine-cis-epoxycarotenoid dioxygenase 3	74.5	0
	1	UN036039	4.11331	0.00157704	1.74359	1	1.09107	0.606104	---	---		---	---	---	---	---
	1	UN011389	5.17928	0.0168637	2.28623	1	0.0605166	1	-0.528033	1		AT5G58130.1	ROS3	RNA-binding (RRM/RBD/RNP motifs) family protein	45.64	1e-43
	1	UN031140	2.95173	3.33699e-12	1.40434	0.201325	-0.00533016	1	---	---		AT3G57450.1	---	unknown protein; Has 65 Blast hits to 65 proteins in 11 species: Archae - 0; Bacteria - 0; Metazoa - 0; Fungi - 0; Plants - 65; Viruses - 0; Other Eukaryotes - 0 (source: NCBI BLink).	84.85	6e-17
	1	UN031909	3.81486	8.52148e-05	2.12569	1	0.48072	1	0.0396154	1		AT1G28480.1	GRX480, roxy19	Thioredoxin superfamily protein	53.33	3e-28
	1	UN007540	6.31319	7.01469e-06	3.60819	1	---	---	-0.703113	1		AT5G01460.1	---	LMBR1-like membrane protein	84.77	0
	1	UN026594	4.49261	1.01424e-10	2.58576	0.28184	0.503359	1	---	---		---	---	---	---	---
	1	UN054590	1.92076	0.00460157	1.0722	1	0.231885	1	-0.18553	1		AT2G32300.1	UCC1	uclacyanin 1	42.86	9e-24
	1	UN031110	5.2035	9.56756e-10	2.4833	1	0.997112	1	0.464051	1		---	---	---	---	---
	1	UN068565	2.46204	1.1888e-05	0.830176	1	0.41334	1	0.071773	1		AT4G05050.1	UBQ11	ubiquitin 11	100	3e-67
	1	UN017557	2.26677	0.0118138	1.22867	1	1.96519	0.181112	1.44349	1		AT2G03090.1	ATEXPA15, EXP15, ATEXP15, ATHEXP ALPHA 1.3, EXPA15	expansin A15	78.95	8e-137
	1	UN023540	3.25232	1	1.08633	1	3.36518	0.919833	2.51994	0.0137705		AT5G65740.2	---	zinc ion binding	56.74	9e-115
	1	UN003880	2.25086	2.0825e-10	2.8038	2.18486e-11	2.35711	0.00837543	2.29933	1		AT5G40390.1	SIP1	Raffinose synthase family protein	64.54	0
	1	UN008800	5.19635	0.0152968	5.7121	0.00814763	3.95058	0.479411	3.86782	0.960126		AT3G54140.1	ATPTR1, PTR1	peptide transporter 1	71.15	0
	1	UN002078	1.98856	0.0104604	2.40608	0.0146238	3.78046	1.43543e-17	2.12489	0.787415		AT4G35560.2	---	Transducin/WD40 repeat-like superfamily protein	46.07	0
	1	UN025395	3.33549	0.0215852	3.72267	1	4.34874	0.00135129	3.25994	1		AT1G14550.1	---	Peroxidase superfamily protein	69.1	6e-146
	1	UN015151	0.962412	0.149708	1.57678	0.000345456	0.720169	0.795925	1.5136	1		AT1G08570.1	ACHT4	atypical CYS HIS rich thioredoxin 4	70.11	1e-90
	1	UN020364	0.876907	0.950969	1.76751	0.0265032	0.555975	1	1.34089	0.886619		AT1G08810.1	MYB60, AtMYB60	myb domain protein 60	79.55	5e-95
	1	UN018683	0.810117	1	1.89253	0.00352846	1.04457	1	2.02845	1		AT2G33590.1	---	NAD(P)-binding Rossmann-fold superfamily protein	57.81	3e-122
	1	UN020909	3.06454	2.17314e-15	1.22311	1	-1.08497	0.785741	2.11247	1		AT4G22920.1	ATNYE1, NYE1	non-yellowing 1	64.94	1e-111
	1	UN001811	3.03826	3.68137e-05	0.0621259	1	0.561307	1	1.70177	0.265258		AT2G15080.1	AtRLP19, RLP19	receptor like protein 19	36.81	1e-133
	1	UN046695	4.51931	0.00720927	0.244589	1	0.276768	1	1.8473	1		---	---	---	---	---
	1	UN022665	4.21538	1.11871e-18	0.8125	1	-0.349475	1	2.86866	0.406486		AT1G22360.1	AtUGT85A2, UGT85A2	UDP-glucosyl transferase 85A2	61.89	0
	1	UN005045	3.45306	0.693227	1.64774	1	0.142031	1	2.48272	0.000546419		AT4G11450.1	---	Protein of unknown function (DUF3527)	36.59	3e-84
	1	UN020397	2.87694	1.90814e-05	1.1048	1	0.322564	1	1.97933	1		AT4G25480.1	DREB1A, CBF3, ATCBF3	dehydration response element B1A	60.42	6e-57
	1	UN022895	2.24694	3.04039e-07	0.943392	1	0.356693	1	1.45486	0.233432		AT2G31570.1	ATGPX2, GPX2	glutathione peroxidase 2	71.34	1e-86
	1	UN018835	3.229	0.00065554	2.0317	0.980044	0.451639	1	2.05028	1		AT5G16080.1	AtCXE17, CXE17	carboxyesterase 17	52.69	7e-120
	1	UN009988	3.53901	6.30723e-28	1.16031	1	1.33453	0.677404	2.3143	1		AT1G78080.1	RAP2.4	related to AP2 4	53.69	3e-50
	1	UN005530	2.62806	0.0477723	0.869561	1	0.772085	1	1.6947	1		AT1G30270.1	CIPK23, SnRK3.23, ATCIPK23, LKS1	CBL-interacting protein kinase 23	80.32	0
	1	UN032339	4.42204	0.0409199	1.4295	1	1.25165	1	3.14812	1		AT5G53560.1	ATB5-A, B5 #2, ATCB5-E, CB5-E	cytochrome B5 isoform E	57.78	8e-55
	1	UN007252	4.7759	0.0688671	3.12209	0.202359	2.62225	0.277405	2.78827	0.0150195		AT5G06740.1	---	Concanavalin A-like lectin protein kinase family protein	47.55	2e-46
	1	UN032564	3.57314	0.0237828	1.83104	0.393312	1.39216	0.0415822	1.49831	0.73916		AT1G55790.1	---	Domain of unknown function (DUF2431)	49.18	1e-12
	1	UN025672	2.92366	0.000684089	1.46862	1	0.982679	1	1.84292	1		AT5G52390.1	---	PAR1 protein	57.31	4e-66
	1	UN024523	1.97909	6.55809e-06	1.01166	1	1.03764	0.214199	1.75081	0.1002		AT2G31945.1	---	unknown protein; FUNCTIONS IN: molecular_function unknown; INVOLVED IN: biological_process unknown; LOCATED IN: endomembrane system; EXPRESSED IN: 8 plant structures; EXPRESSED DURING: 4 anthesis, petal differentiation and expansion stage; BEST Arabidopsis thaliana protein match is: unknown protein (TAIR:AT1G05575.1); Has 61 Blast hits to 61 proteins in 10 species: Archae - 0; Bacteria - 0; Metaz…	47.06	1e-14
	1	UN020639	1.80405	3.62352e-07	1.23752	0.209378	0.570734	1	1.64113	1		AT1G14330.1	---	Galactose oxidase/kelch repeat superfamily protein	73.28	1e-63
	1	UN036360	2.99987	0.0296441	2.40834	0.211272	1.99075	1	2.71739	1		AT3G12500.1	ATHCHIB, PR3, PR-3, CHI-B, B-CHI, HCHIB	basic chitinase	77.03	7e-83
	1	UN065480	1.5933	0.00365602	1.34762	0.25628	0.754353	1	1.45634	0.975977		AT4G05050.1	UBQ11	ubiquitin 11	100	1e-72
	1	UN000115	5.37732	0.00662735	0.595497	1	1.15589	1	1.00344	1		AT5G07980.1	---	dentin sialophosphoprotein-related	36.99	2e-70
	1	UN014497	4.19091	0.000947984	0.727324	1	0.21421	1	0.580992	1		AT1G16120.1	WAKL1	wall associated kinase-like 1	39.33	1e-61
	1	UN031338	2.2441	4.17033e-05	0.644845	1	0.383079	1	0.737598	1		AT3G19660.1	---	unknown protein; Has 16 Blast hits to 16 proteins in 6 species: Archae - 0; Bacteria - 0; Metazoa - 0; Fungi - 0; Plants - 16; Viruses - 0; Other Eukaryotes - 0 (source: NCBI BLink).	67.74	5e-17
	1	UN010644	2.50663	1.09906e-06	0.828595	1	0.168376	1	---	---		AT1G55530.1	---	RING/U-box superfamily protein	52.92	2e-82
	1	UN023351	5.17408	0.0143978	1.12985	1	2.96757	1	1.36878	0.58354		AT1G59820.1	ALA3	aminophospholipid ATPase 3	71.14	1e-148
	1	UN038205	2.84047	0.00472777	0.546834	1	1.39039	1	0.44349	1		AT1G22360.1	AtUGT85A2, UGT85A2	UDP-glucosyl transferase 85A2	60.26	4e-103
	1	UN056938	3.39695	0.0433011	0.648801	1	1.64406	1	1.45064	1		AT2G15220.1	---	Plant basic secretory protein (BSP) family protein	70.37	1e-67
	1	UN037779	7.61868	7.38266e-15	---	---	---	---	1.09574	1		AT1G24260.2	SEP3, AGL9	K-box region and MADS-box transcription factor family protein	77.78	1e-100
	1	UN010462	7.84355	1.50088e-16	-0.980038	1	6.07513	0.0017671	---	---		AT1G78800.1	---	UDP-Glycosyltransferase superfamily protein	73.63	0
	1	UN008109	1.78987	0.0231168	0.636039	1	1.08176	0.165872	---	---		AT4G17980.1	anac071, NAC071	NAC domain containing protein 71	75.93	7e-79
	1	UN007175	6.09466	5.33038e-05	---	---	---	---	0.903512	0.34361		AT4G38360.2	LAZ1	Protein of unknown function (DUF300)	74.84	0
	1	UN014441	8.34854	1.95164e-13	3.18127	0.0211525	0.800377	1	2.19583	0.891701		AT5G42930.1	---	alpha/beta-Hydrolases superfamily protein	45.34	5e-67
	1	UN005887	2.27261	7.01252e-07	1.19689	1	0.19612	1	0.624713	1		---	---	---	---	---
	1	UN013027	2.7204	9.10713e-05	1.57662	0.739738	0.131847	1	0.475296	1		AT5G49970.1	ATPPOX, PDX3, PPOX	pyridoxin (pyrodoxamine) 5'-phosphate oxidase	62.77	0
	1	UN008537	2.39988	0.000289198	1.26804	0.163422	0.258078	1	0.338038	1		AT5G18470.1	---	Curculin-like (mannose-binding) lectin family protein	31.98	1e-38
	1	UN029073	4.04286	3.4902e-06	2.26588	0.00552762	0.648895	1	0.800659	1		AT1G29290.1	---	unknown protein; FUNCTIONS IN: molecular_function unknown; INVOLVED IN: biological_process unknown; LOCATED IN: endomembrane system; Has 18 Blast hits to 18 proteins in 5 species: Archae - 0; Bacteria - 0; Metazoa - 0; Fungi - 0; Plants - 18; Viruses - 0; Other Eukaryotes - 0 (source: NCBI BLink).	43.84	1e-12
	1	UN008497	5.28942	0.00826268	2.87123	1	-0.132291	1	2.37063	0.19086		AT1G53200.1	---	unknown protein; Has 21 Blast hits to 21 proteins in 9 species: Archae - 0; Bacteria - 2; Metazoa - 0; Fungi - 0; Plants - 19; Viruses - 0; Other Eukaryotes - 0 (source: NCBI BLink).	32.08	4e-48
	1	UN008930	2.36734	1.4144e-08	1.42676	0.217266	0.387694	1	0.883889	1		AT4G18910.1	NIP1;2, NLM2, ATNLM2	NOD26-like intrinsic protein 1;2	64.08	9e-114
	1	UN032894	2.97643	0.00576414	1.75268	0.165068	0.266326	1	1.02845	1		AT3G50120.1	---	Plant protein of unknown function (DUF247)	46.31	7e-39
	1	UN018787	4.6125	1.18216e-09	2.10455	1	0.0658129	1	0.296419	1		AT4G30230.1	---	unknown protein; Has 42 Blast hits to 42 proteins in 5 species: Archae - 0; Bacteria - 0; Metazoa - 0; Fungi - 0; Plants - 42; Viruses - 0; Other Eukaryotes - 0 (source: NCBI BLink).	29.6	8e-09
	1	UN014438	2.97314	3.15793e-06	1.00487	1	-0.0195089	1	0.17243	1		AT3G49690.1	RAX3, MYB84, ATMYB84	myb domain protein 84	90.84	8e-80
	1	UN023900	6.371	0.000801024	2.11047	1	-0.21983	1	0.0784	1		AT2G38640.1	---	Protein of unknown function (DUF567)	34.95	9e-22
	1	UN026805	5.61201	3.46295e-06	2.30749	1	-0.383129	1	---	---		AT5G17540.1	---	HXXXD-type acyl-transferase family protein	48.8	9e-37
	1	UN036625	5.8739	1.0685e-05	2.37768	1	-0.666144	1	0.65054	1		AT4G35160.1	---	O-methyltransferase family protein	31.63	2e-21
	1	UN009925	2.71079	0.00347286	1.11541	0.0711719	-0.595892	1	0.242755	1		AT1G64940.1	CYP89A6	cytochrome P450, family 87, subfamily A, polypeptide 6	52.99	2e-177
	1	UN019449	3.37337	0.00642448	1.82683	1	-0.709837	1	---	---		AT3G12580.1	HSP70, ATHSP70	heat shock protein 70	64.06	6e-72
	1	UN042088	6.0755	1.17856e-05	3.30789	0.00721891	-1.29425	1	0.44349	1		AT5G52390.1	---	PAR1 protein	69.05	2e-37
	1	UN013313	2.76951	0.00525661	1.19486	1	-0.682253	0.740934	1.07177	1		AT4G24000.1	ATCSLG2, CSLG2	cellulose synthase like G2	40.49	5e-124
	1	UN032805	3.2741	6.86953e-11	0.49808	1	-0.311325	1	0.770735	1		AT2G25625.1	---	unknown protein; FUNCTIONS IN: molecular_function unknown; INVOLVED IN: biological_process unknown; LOCATED IN: chloroplast; EXPRESSED IN: 10 plant structures; EXPRESSED DURING: LP.06 six leaves visible, LP.04 four leaves visible, 4 anthesis, petal differentiation and expansion stage; Has 24 Blast hits to 24 proteins in 9 species: Archae - 0; Bacteria - 0; Metazoa - 0; Fungi - 0; Plants - 24; Vir…	57.38	2e-16
	1	UN015429	2.94314	0.00961918	2.18917	0.0610535	-0.439467	1	0.913895	1		AT3G48510.1	---	unknown protein; BEST Arabidopsis thaliana protein match is: unknown protein (TAIR:AT5G63350.1); Has 98 Blast hits to 98 proteins in 11 species: Archae - 0; Bacteria - 0; Metazoa - 0; Fungi - 0; Plants - 98; Viruses - 0; Other Eukaryotes - 0 (source: NCBI BLink).	40.57	2e-30
	1	UN020106	2.04352	0.00129959	1.70726	0.746828	-0.592041	0.954101	0.621029	1		AT1G59960.1	---	NAD(P)-linked oxidoreductase superfamily protein	52.61	1e-121
	1	UN031054	2.35903	1.56393e-08	2.03892	1	-0.721664	0.9023	---	---		AT2G38640.1	---	Protein of unknown function (DUF567)	52	2e-63
	1	UN036358	3.14245	1	2.51289	1	-1.02921	1	1.83354	0.00398578		---	---	---	---	---
	1	UN060868	2.33946	0.0459211	1.84992	1	-0.538933	1	1.12147	1		AT2G23270.1	---	unknown protein; FUNCTIONS IN: molecular_function unknown; INVOLVED IN: biological_process unknown; LOCATED IN: endomembrane system; EXPRESSED IN: stem, sperm cell, root, stamen; EXPRESSED DURING: 4 anthesis; BEST Arabidopsis thaliana protein match is: unknown protein (TAIR:AT4G37290.1); Has 36 Blast hits to 35 proteins in 6 species: Archae - 0; Bacteria - 0; Metazoa - 0; Fungi - 0; Plants - 36; …	48.98	8e-08
	1	UN036024	2.67139	0.0205754	3.16351	0.209378	0.446068	1	1.99545	1		AT3G26330.1	CYP71B37	cytochrome P450, family 71, subfamily B, polypeptide 37	53.54	3e-70
	1	UN026447	2.37827	0.00791196	2.63057	2.86975e-07	0.467454	1	1.02845	1		AT1G18280.1	---	Bifunctional inhibitor/lipid-transfer protein/seed storage 2S albumin superfamily protein	41.98	4e-16
	1	UN027873	3.38681	0.912099	3.02564	1	0.676831	1	2.00447	0.012785		---	---	---	---	---
	1	UN049792	1.86231	1.91643e-05	1.72671	1.25081e-05	0.563364	1	---	---		AT4G05050.1	UBQ11	ubiquitin 11	100	5e-90
	1	UN005273	1.66535	0.027166	1.3288	0.246083	0.523393	1	0.7059	1		AT5G24800.1	ATBZIP9, BZO2H2, BZIP9	basic leucine zipper 9	43.4	4e-41
	1	UN018925	3.20283	8.11831e-22	2.24124	0.37177	0.836906	1	1.28143	1		AT4G25780.1	---	CAP (Cysteine-rich secretory proteins, Antigen 5, and Pathogenesis-related 1 protein) superfamily protein	59.75	3e-73
	1	UN024697	5.41325	4.48708e-05	3.90013	1	1.82304	1	1.80869	1		---	---	---	---	---
	1	UN019076	1.81495	0.00504059	1.37068	1	0.556113	1	0.44349	1		AT5G63030.1	---	Thioredoxin superfamily protein	63.56	1e-49
	1	UN012564	3.50033	0.00122472	2.20745	1.10313e-08	1.41233	1	0.414892	1		AT3G48310.1	CYP71A22	cytochrome P450, family 71, subfamily A, polypeptide 22	49.12	3e-151
	1	UN009525	2.14078	0.00209135	1.34081	1	0.634448	1	0.181429	1		AT5G24080.1	---	Protein kinase superfamily protein	46.36	6e-79
	1	UN028376	2.82221	3.71033e-20	1.94445	5.96489e-05	0.951728	0.378268	0.399433	1		AT1G80160.1	---	Lactoylglutathione lyase / glyoxalase I family protein	75.33	5e-82
	1	UN011521	2.7003	3.50805e-20	2.66049	0.00525275	0.666217	1	0.229503	1		AT4G27410.3	RD26	NAC (No Apical Meristem) domain transcriptional regulator superfamily protein	61.51	4e-98
	1	UN022830	5.60686	1.20694e-06	4.98205	2.34797e-05	1.43057	0.52578	1.01759	0.334706		AT1G24620.1	---	EF hand calcium-binding protein family	50	9e-43
	1	UN033942	5.09189	0.0205754	4.38701	0.835555	1.66153	1	0.752394	1		AT4G18910.1	NIP1;2, NLM2, ATNLM2	NOD26-like intrinsic protein 1;2	67.02	2e-91
	1	UN017141	1.93671	0.0101424	1.69764	0.00721891	0.760818	0.948614	0.0859514	1		AT3G04070.1	anac047, NAC047	NAC domain containing protein 47	46.39	5e-90
	1	UN036581	8.17053	5.11732e-11	7.21561	0.000112641	3.16174	0.51932	0.819402	1		AT4G33467.1	---	unknown protein; Has 25 Blast hits to 25 proteins in 9 species: Archae - 0; Bacteria - 0; Metazoa - 0; Fungi - 0; Plants - 25; Viruses - 0; Other Eukaryotes - 0 (source: NCBI BLink).	50.85	2e-11
	1	UN005668	2.37335	0.0135155	2.02822	5.1542e-06	1.19088	0.0669333	0.534868	1		AT5G24530.1	DMR6	2-oxoglutarate (2OG) and Fe(II)-dependent oxygenase superfamily protein	63.02	4e-160
	1	UN018931	4.3667	5.60031e-07	4.60585	0.0388297	2.32218	0.000898931	0.907272	1		AT4G39700.1	---	Heavy metal transport/detoxification superfamily protein	63.29	2e-61
	1	UN052943	2.88418	0.00389524	2.92132	0.145886	1.87976	0.908117	0.736778	1		---	---	---	---	---
	1	UN016270	1.77171	0.0178763	1.60719	0.0690467	0.0250359	1	0.379907	1		AT3G57540.1	---	Remorin family protein	52.7	2e-53
	1	UN031005	2.33888	0.0328805	1.85265	0.867652	0.0360984	1	0.596781	1		AT5G06320.1	NHL3	NDR1/HIN1-like 3	44.17	4e-44
	1	UN009890	5.0302	0.306749	5.70364	6.53091e-12	0.743944	1	0.167723	1		AT3G57520.1	AtSIP2, SIP2	seed imbibition 2	76.4	0
	1	UN020331	2.42147	1.70709e-10	2.41435	0.00047568	0.348337	1	0.452276	1		AT1G08080.1	ATACA7, ACA7	alpha carbonic anhydrase 7	62.55	3e-114
	1	UN033954	1.72542	0.000151852	1.83471	0.0187435	0.160178	1	0.399433	1		AT3G54820.1	PIP2D, PIP2;5	plasma membrane intrinsic protein 2;5	75	1e-56
	1	UN005257	1.57376	1.75769e-07	1.33975	0.0146238	0.263999	1	-0.0868749	1		AT1G62300.1	WRKY6, ATWRKY6	WRKY family transcription factor	53.57	4e-110
	1	UN018444	3.69121	2.69939e-07	2.66821	1	0.440206	1	0.0296866	1		AT1G07430.1	HAI2	highly ABA-induced PP2C gene 2	53.66	2e-68
	1	UN029131	6.64137	2.68999e-13	4.55999	0.000106337	0.462533	1	0.40143	1		---	---	---	---	---
	1	UN029272	1.75063	0.0324715	1.34245	1	0.0902697	1	-0.0199835	1		AT1G14560.1	---	Mitochondrial substrate carrier family protein	71.6	2e-83
	1	UN012900	2.07192	0.00720389	1.489	0.0451051	0.311642	1	0.180798	1		AT1G07430.1	HAI2	highly ABA-induced PP2C gene 2	61.01	3e-126
	1	UN004112	4.97112	0.00576414	3.39046	0.00755614	0.604464	1	0.537406	1		AT1G61120.1	TPS04, GES, TPS4	terpene synthase 04	42.19	0
	1	UN015183	3.15393	8.78403e-09	1.98654	1	0.426943	1	0.383443	1		AT1G64380.1	---	Integrase-type DNA-binding superfamily protein	45.95	1e-57
	1	UN070374	3.39707	6.5311e-05	2.36976	1	0.650306	1	0.764531	1		AT4G35100.1	PIP3, PIP3A, PIP2;7, SIMIP	plasma membrane intrinsic protein 3	93.81	2e-62
	1	UN030282	2.93736	0.332692	1.73883	1	0.33098	1	3.21069	6.58387e-05		AT4G13830.2	J20	DNAJ-like 20	37.9	6e-19
	1	UN021360	4.45813	0.0164552	1.64455	1	-0.386799	1	---	---		AT4G18960.1	AG	K-box region and MADS-box transcription factor family protein	67.52	1e-107
	1	UN040681	5.82094	8.37539e-69	3.09966	6.96289e-05	-1.12395	0.959212	---	---		AT5G52390.1	---	PAR1 protein	62	2e-62
	1	UN060584	2.6607	0.00547891	1.29759	1	-0.010365	1	---	---		AT3G18830.1	ATPLT5, PMT5, ATPMT5	polyol/monosaccharide transporter 5	67.5	4e-31
	1	UN011626	1.70546	0.00134827	1.31973	1	0.237524	1	---	---		AT3G56630.1	CYP94D2	cytochrome P450, family 94, subfamily D, polypeptide 2	53.23	2e-14
	1	UN030961	5.29264	0.0262849	1.1106	1	0.131708	1	---	---		AT4G11650.1	ATOSM34, OSM34	osmotin 34	67.66	3e-99
	1	UN025525	2.39569	0.495306	7.78032	1.41844e-15	---	---	---	---		AT1G64390.1	AtGH9C2, GH9C2	glycosyl hydrolase 9C2	65.53	1e-88
	1	UN034418	2.58821	3.1103e-06	3.60432	0.00063505	1.91482	0.11226	---	---		---	---	---	---	---
	1	UN013085	4.9955	0.0307229	---	---	-0.822751	1	-1.40117	1		AT3G02645.1	---	Plant protein of unknown function (DUF247)	34.62	6e-48
	1	UN024781	5.64091	0.00135302	-1.38073	1	---	---	-1.50986	1		AT2G46820.1	PTAC8, TMP14, PSAP, PSI-P	photosystem I P subunit	53.8	9e-51
	1	UN012313	3.73281	0.911108	7.62588	7.35543e-14	---	---	-0.363957	1		AT4G34440.1	---	Protein kinase superfamily protein	61.67	3e-122
	1	UN004116	5.54771	0.00267653	2.42381	1	-5.40083	0.0422344	1.15793	1		AT2G42320.1	---	nucleolar protein gar2-related	61.35	0
	1	UN004115	5.39859	0.00587729	5.22243	0.0492446	-4.86706	0.48056	0.50851	1		AT2G42320.1	---	nucleolar protein gar2-related	61.55	0
	1	UN026170	2.32621	3.38347e-06	2.27289	1.92337e-07	-0.599038	1	2.05617	1		AT5G19875.1	---	unknown protein; FUNCTIONS IN: molecular_function unknown; INVOLVED IN: response to oxidative stress; LOCATED IN: endomembrane system; EXPRESSED IN: 21 plant structures; EXPRESSED DURING: 13 growth stages; BEST Arabidopsis thaliana protein match is: unknown protein (TAIR:AT2G31940.1); Has 30201 Blast hits to 17322 proteins in 780 species: Archae - 12; Bacteria - 1396; Metazoa - 17338; Fungi - 342…	53.26	5e-16
	1	UN034964	3.38113	0.913651	4.08231	1	0.30694	1	4.71937	0.000515349		AT2G03090.1	ATEXPA15, EXP15, ATEXP15, ATHEXP ALPHA 1.3, EXPA15	expansin A15	77.25	1e-115
	1	UN042698	0.942262	1	2.64855	0.0388297	-0.15246	1	1.47121	1		AT4G39330.1	ATCAD9, CAD9	cinnamyl alcohol dehydrogenase 9	69.83	5e-94
	1	UN036165	0.456899	1	7.12329	0.0019381	---	---	1.08137	1		AT2G18600.1	---	Ubiquitin-conjugating enzyme family protein	87.42	2e-104
	1	UN010760	5.06532	0.0269234	---	---	---	---	2.4761	1		AT5G06900.1	CYP93D1	cytochrome P450, family 93, subfamily D, polypeptide 1	45.93	3e-167
	1	UN002781	4.98304	0.0358717	---	---	---	---	0.21422	1		AT4G02510.1	TOC159, TOC86, PPI2, TOC160, ATTOC159	translocon at the outer envelope membrane of chloroplasts 159	58.9	4e-124
	1	UN011974	-0.779963	1	5.35851	0.0378423	2.89971	1	0.499859	1		AT5G51290.1	---	Diacylglycerol kinase family protein	74.19	5e-57
	1	UN003711	---	---	5.06762	0.151052	3.91834	5.07213e-07	0.363426	1		AT4G01970.1	AtSTS, STS	stachyose synthase	57.78	1e-153
	1	UN035278	2.55712	0.426734	3.40783	0.163462	5.37483	2.52889e-17	-1.06244	1		AT3G12670.1	emb2742	CTP synthase family protein	90.34	7e-96
	1	UN023724	5.48558	0.00285636	3.29912	1	---	---	0.373202	1		AT1G60640.1	---	unknown protein; Has 42416 Blast hits to 22533 proteins in 1340 species: Archae - 32; Bacteria - 6461; Metazoa - 16431; Fungi - 3749; Plants - 1747; Viruses - 284; Other Eukaryotes - 13712 (source: NCBI BLink).	51.92	2e-14
	1	UN029966	0.142955	1	3.35912	1	0.607979	1	1.38487	0.0432233		AT3G27340.1	---	FUNCTIONS IN: molecular_function unknown; INVOLVED IN: oxidation reduction; EXPRESSED IN: 23 plant structures; EXPRESSED DURING: 15 growth stages; CONTAINS InterPro DOMAIN/s: Gamma-butyrobetaine dioxygenase/Trimethyllysine dioxygenase, N-terminal (InterPro:IPR010376); Has 1035 Blast hits to 1035 proteins in 399 species: Archae - 0; Bacteria - 765; Metazoa - 0; Fungi - 0; Plants - 39; Viruses - 0;…	69.92	1e-62
	1	UN019441	-0.326555	1	6.84445	0.0446733	-0.360868	1	2.36307	0.143787		AT3G60800.1	---	DHHC-type zinc finger family protein	85.11	3e-101
	1	UN028425	-0.52878	1	5.98197	0.000623899	---	---	2.06599	0.935977		AT3G63400.1	---	Cyclophilin-like peptidyl-prolyl cis-trans isomerase family protein	57.35	7e-13
	1	UN004897	-0.0224752	1	6.94836	7.69519e-08	0.108477	1	-0.626725	0.826977		AT1G77590.1	LACS9	long chain acyl-CoA synthetase 9	75.32	0
	1	UN005696	-0.276606	1	7.15119	1.307e-09	-0.731755	1	-1.10376	1		AT4G17570.2	GATA26	GATA transcription factor 26	45.9	5e-121
	1	UN025247	-0.756299	1	6.61718	5.39817e-06	0.799103	1	-1.13433	1		AT3G17365.2	---	S-adenosyl-L-methionine-dependent methyltransferases superfamily protein	50.19	7e-82
	1	UN011309	-0.277022	1	5.82192	0.00434751	0.354901	1	0.457428	1		AT5G01020.1	---	Protein kinase superfamily protein	80.77	0
	1	UN013255	0.867102	1	6.56269	2.32768e-06	-0.704053	1	0.617409	1		AT2G43240.1	---	Nucleotide-sugar transporter family protein	81.03	0
	1	UN028532	0.766782	1	8.94634	9.50523e-31	-0.0515183	1	0.479231	1		AT2G29960.1	CYP5, ATCYP5, CYP19-4	cyclophilin 5	87.78	2e-107
	1	UN006910	0.670811	1	2.51392	0.0433185	0.182324	1	-0.366371	1		AT2G07560.1	AHA6, HA6	H(+)-ATPase 6	25.29	2e-46
	1	UN010561	2.443	1	5.42905	0.0265032	0.0773366	1	-2.24144	0.346875		---	---	---	---	---
	1	UN007074	0.229273	1	5.27854	0.047737	1.22756	1	-0.411764	1		AT5G03910.1	ATATH12, ATH12	ABC2 homolog 12	60.58	0
	1	UN009271	0.851323	1	12.2113	8.54816e-112	3.6888	0.0603577	-0.874842	1		AT5G60790.1	ATGCN1, GCN1	ABC transporter family protein	85.74	0
	1	UN009588	0.321619	1	6.67098	9.39856e-07	1.40785	1	-1.15209	1		AT1G05150.1	---	Calcium-binding tetratricopeptide family protein	73.7	0
	1	UN017025	0.324542	1	2.27592	0.0305282	0.870561	1	-0.392554	1		AT4G38660.1	---	Pathogenesis-related thaumatin superfamily protein	70.89	3e-119
	1	UN029160	0.645804	0.547086	2.3257	1.35155e-05	1.17372	0.165705	-0.0725462	1		AT5G53870.1	ENODL1, AtENODL1	early nodulin-like protein 1	60.75	9e-43
	1	UN015402	1.49508	1	5.82277	0.00382029	1.63378	1	0.0623719	1		AT1G04945.3	---	HIT-type Zinc finger family protein	63.52	1e-106
	1	UN036280	1.29615	0.174775	6.24046	0.000190851	2.28371	1	-0.396733	1		AT2G19770.1	PRF5	profilin 5	71.2	5e-67
	1	UN005101	-0.443432	1	5.68253	0.00588914	---	---	-0.724427	1		AT4G02010.1	---	Protein kinase superfamily protein	64.86	0
	1	UN008797	0.133963	1	3.51746	0.027721	-0.870227	1	0.488457	1		AT5G19900.1	---	PRLI-interacting factor, putative	78.5	1e-86
	1	UN021295	-0.43694	1	5.79318	0.00278669	-1.67675	1	-0.0390209	1		AT5G12470.1	---	Protein of unknown function (DUF3411)	76.11	5e-117
	1	UN001875	0.4652	1	11.0374	5.94276e-80	-3.57725	0.000898931	-2.67813	0.456636		ATCG00800.1	---	structural constituent of ribosome	82.12	7e-88
	1	UN007702	0.629663	1	8.14382	1.19074e-19	-4.24703	0.535838	-2.31624	1		AT5G55310.1	TOP1BETA, TOP1	DNA topoisomerase 1 beta	77.9	0
	1	UN003409	0.927304	1	8.57453	8.42467e-26	---	---	-0.430578	1		AT4G37460.1	SRFR1	Tetratricopeptide repeat (TPR)-like superfamily protein	70.01	0
	2	UN026644	1.81713	0.0236134	0.868643	1	-0.352385	1	---	---		AT3G19660.1	---	unknown protein; Has 16 Blast hits to 16 proteins in 6 species: Archae - 0; Bacteria - 0; Metazoa - 0; Fungi - 0; Plants - 16; Viruses - 0; Other Eukaryotes - 0 (source: NCBI BLink).	48.15	4e-07
	2	UN015954	0.621006	1	0.621476	1	-0.0473461	1	-1.26205	0.0142483		AT1G43130.1	LCV2	like COV 2	76.05	1e-120
	2	UN022567	0.180525	1	0.63651	1	-0.187528	1	-1.30486	0.0240115		AT4G14200.1	---	Pentatricopeptide repeat (PPR) superfamily protein	33.33	4e-09
	2	UN010209	0.343848	1	0.291881	1	-0.388067	1	-1.44412	0.00253376		---	---	---	---	---
	2	UN034077	1.95852	0.00295223	1.66718	1	-0.790709	1	---	---		AT1G23220.1	---	Dynein light chain type 1 family protein	54.35	7e-30
	2	UN014286	0.954318	1	0.211291	1	0.0887307	1	-1.47215	0.000556443		AT3G18080.1	BGLU44	B-S glucosidase 44	68.33	0
	2	UN029846	1.82078	0.000133644	0.814596	1	-0.00186456	1	---	---		AT5G27200.1	ACP5	acyl carrier protein 5	59.8	6e-36
	2	UN001320	1.15103	0.0131514	0.278577	1	0.0536885	1	-1.21749	0.135023		AT1G08800.1	---	Protein of unknown function, DUF593	43.12	2e-49
	2	UN031070	1.44656	0.0169089	0.508845	1	0.415084	1	-1.007	1		AT1G29290.1	---	unknown protein; FUNCTIONS IN: molecular_function unknown; INVOLVED IN: biological_process unknown; LOCATED IN: endomembrane system; Has 18 Blast hits to 18 proteins in 5 species: Archae - 0; Bacteria - 0; Metazoa - 0; Fungi - 0; Plants - 18; Viruses - 0; Other Eukaryotes - 0 (source: NCBI BLink).	60	1e-12
	2	UN009651	0.75998	0.550113	0.576085	1	0.586997	1	-1.21852	0.04484		AT2G26310.1	---	Chalcone-flavanone isomerase family protein	48.51	1e-120
	2	UN004345	1.41128	0.0237828	0.854152	1	0.833297	0.375095	-0.886192	1		AT1G27910.1	PUB45, ATPUB45	plant U-box 45	59.47	0
	2	UN010353	1.24349	0.00195422	0.861343	1	0.0760136	1	-1.04735	1		AT3G24170.1	ATGR1, GR1	glutathione-disulfide reductase	75.72	0
	2	UN015284	1.03518	0.00701122	0.774451	1	0.0880564	1	-0.949838	1		AT5G42050.1	---	DCD (Development and Cell Death) domain protein	86.93	9e-99
	2	UN004933	1.15883	0.00142734	0.843582	1	-0.0462913	1	-1.06306	1		AT1G15460.1	ATBOR4, BOR4	HCO3- transporter family	69.79	0
	2	UN051589	1.45463	0.0395343	0.965724	1	-0.00428414	1	-1.43661	1		AT2G32300.1	UCC1	uclacyanin 1	37.38	1e-20
	2	UN030578	0.889552	0.723846	1.32447	0.0380732	-0.0979898	1	-0.97107	1		AT1G72150.1	PATL1	PATELLIN 1	69.7	2e-27
	2	UN030229	1.27723	0.0459211	-0.729838	1	0.376806	1	-0.775007	0.348378		AT5G05480.1	---	Peptide-N4-(N-acetyl-beta-glucosaminyl)asparagine amidase A protein	39.64	1e-49
	2	UN030523	1.67826	0.0188244	-0.555448	1	0.6355	1	-0.682091	1		---	---	---	---	---
	2	UN015290	1.30822	0.000528968	-0.288075	1	-1.67132	0.0372371	-0.428586	1		AT1G08650.1	PPCK1, ATPPCK1	phosphoenolpyruvate carboxylase kinase 1	58.74	3e-109
	2	UN003814	1.54466	0.0139841	0.177069	1	-2.4834	0.130457	-0.300271	1		AT3G55270.1	MKP1, ATMKP1	mitogen-activated protein kinase phosphatase 1	52.25	6e-168
	2	UN017825	1.62501	0.000495111	-0.273234	1	-2.82035	0.143659	-0.666272	1		AT1G35720.1	ANNAT1, OXY5, ATOXY5	annexin 1	62.54	1e-142
	2	UN013975	0.879172	0.503215	-0.0739922	1	-1.69913	0.0232691	-0.37947	1		AT1G04680.1	---	Pectin lyase-like superfamily protein	80.39	0
	2	UN029557	1.84798	2.75487e-07	-0.109848	1	-3.68354	0.00024184	-0.679715	1		AT2G15050.1	LTP, LTP7	lipid transfer protein	29.89	7e-06
	2	UN035408	2.33021	9.53318e-07	-0.265047	1	-2.69023	0.00733334	0.0109365	1		AT1G24020.1	MLP423	MLP-like protein 423	37.29	3e-25
	2	UN030517	2.73312	0.000352102	0.919024	1	-4.24928	0.968326	-0.26576	1		AT5G62350.1	---	Plant invertase/pectin methylesterase inhibitor superfamily protein	50	7e-33
	2	UN004576	2.03314	0.900668	0.550501	1	-4.99572	3.98993e-05	0.190867	1		AT4G12290.1	---	Copper amine oxidase family protein	63.2	0
	2	UN005806	0.564928	0.370675	0.0433627	1	-1.67358	0.00765721	0.0681878	1		AT1G02500.1	SAM1, SAM-1, MAT1, AtSAM1	S-adenosylmethionine synthetase 1	95.17	0
	2	UN013671	0.665198	0.166334	0.284612	1	-1.38148	0.00996212	0.0548877	1		AT5G37600.1	ATGSR1, GLN1;1, GSR 1, ATGLN1;1	glutamine synthase clone R1	89.04	0
	2	UN017338	1.0026	0.00644697	0.285116	1	-1.90992	1.88315e-05	0.328582	1		AT3G17390.1	MTO3, SAMS3, MAT4	S-adenosylmethionine synthetase family protein	94.68	0
	2	UN018913	0.813736	0.183248	0.547193	1	-1.75929	0.0058495	---	---		AT3G05500.1	---	Rubber elongation factor protein (REF)	57.87	8e-72
	2	UN023408	0.585856	0.496924	0.356377	1	-1.34622	0.0487906	-0.229349	1		AT5G58590.1	RANBP1	RAN binding protein 1	75.29	5e-93
	2	UN012155	0.53173	0.997353	0.227341	1	-1.72597	0.0362374	-0.348865	1		AT2G47970.1	---	Nuclear pore localisation protein NPL4	76.47	4e-57
	2	UN021186	0.886347	0.94602	0.234931	1	-2.38135	0.0247357	-0.411689	1		AT2G01610.1	---	Plant invertase/pectin methylesterase inhibitor superfamily protein	49.16	8e-43
	2	UN058483	0.65529	0.649401	0.147108	1	-1.43542	0.0174184	-0.18553	1		AT4G05050.1	UBQ11	ubiquitin 11	99.22	4e-87
	2	UN001332	1.04187	0.0287736	0.211253	1	-0.96709	0.354195	-0.0553281	1		AT2G43500.1	---	Plant regulator RWP-RK family protein	46.49	0
	2	UN010665	2.3207	0.000341869	0.150734	1	-2.22478	0.253291	-0.367254	1		AT4G31940.1	CYP82C4	cytochrome P450, family 82, subfamily C, polypeptide 4	55.13	2e-172
	2	UN023042	1.90473	0.0370047	0.162212	1	-1.37577	0.136966	-0.520689	1		AT4G16260.1	---	Glycosyl hydrolase superfamily protein	59.24	7e-135
	2	UN012069	1.59147	0.000646063	0.250712	1	-0.934088	0.568674	-0.248492	1		AT3G53140.1	---	O-methyltransferase family protein	65.91	1e-10
	2	UN024900	1.08465	0.0281328	0.152016	1	-0.683361	0.620888	-0.180673	1		AT5G50200.3	WR3	nitrate transmembrane transporters	55.41	1e-51
	2	UN014897	1.62936	5.49292e-06	0.345049	1	-1.79818	0.300895	-0.590436	0.974363		AT2G20340.1	---	Pyridoxal phosphate (PLP)-dependent transferases superfamily protein	55.62	0
	2	UN025846	1.14272	0.0600492	0.259425	1	-1.59251	0.00989154	-0.639146	1		AT3G06590.1	---	basic helix-loop-helix (bHLH) DNA-binding superfamily protein	63.33	8e-18
	2	UN008353	1.9625	0.00854413	1.00499	1	-1.52964	0.245185	-1.00565	1		---	---	---	---	---
	2	UN016833	1.13475	0.00858832	0.390435	1	-0.727169	0.772378	-0.526511	1		AT4G22240.1	---	Plastid-lipid associated protein PAP / fibrillin family protein	76.21	5e-122
	2	UN025056	0.968593	0.0375247	0.247355	1	-0.84952	0.38016	-0.481281	1		AT3G21360.1	---	2-oxoglutarate (2OG) and Fe(II)-dependent oxygenase superfamily protein	65.89	1e-124
	2	UN063206	1.15369	0.0270477	0.399058	1	-1.11838	0.438196	-0.51901	1		AT4G05050.1	UBQ11	ubiquitin 11	100	7e-77
	2	UN008486	0.85799	0.0235677	-0.355411	1	-0.445858	1	-0.53573	1		AT5G02500.1	HSC70-1, HSP70-1, AT-HSC70-1, HSC70	heat shock cognate protein 70-1	95.15	0
	2	UN008719	2.14543	8.41496e-14	-1.0721	1	-1.24289	1	-1.54166	0.694915		---	---	---	---	---
	2	UN020511	1.32783	1	-1.0294	1	-2.0634	1	-1.59804	0.0237518		AT3G56930.1	---	DHHC-type zinc finger family protein	59.3	1e-68
	2	UN008141	1.16684	0.0333214	-0.248164	1	-1.09007	0.2491	-0.697244	1		AT1G43710.1	emb1075	Pyridoxal phosphate (PLP)-dependent transferases superfamily protein	83.84	0
	2	UN005497	1.34659	5.81222e-05	0.0315265	1	-1.2763	0.694788	-0.93116	1		AT5G40010.1	AATP1	AAA-ATPase 1	56.18	1e-173
	2	UN018092	1.51346	0.145015	-0.202022	1	-2.0154	0.000572845	-1.31247	1		---	---	---	---	---
	2	UN038306	3.42639	3.4832e-05	-0.284365	1	-3.78307	0.874228	-3.13612	1		---	---	---	---	---
	2	UN006133	1.67499	4.84571e-07	-0.34025	1	-1.28254	0.633892	-0.666589	1		AT1G17840.1	WBC11, ABCG11, DSO, COF1, ATWBC11	white-brown complex homolog protein 11	54.46	0
	2	UN011769	4.86874	0.0494189	-0.691231	1	-3.44522	1	-1.34209	1		---	---	---	---	---
	2	UN041730	0.994223	0.0396535	-0.0719111	1	-0.622278	0.919856	-0.34685	1		AT2G16130.1	PMT2, ATPMT2	polyol/monosaccharide transporter 2	63.59	8e-86
	2	UN012525	---	---	-0.176707	1	-1.36695	1	-1.59224	0.0010094		AT4G35270.1	---	Plant regulator RWP-RK family protein	61.64	1e-27
	2	UN064291	1.05715	0.0101526	-0.10548	1	-0.815908	0.845582	---	---		AT4G05050.1	UBQ11	ubiquitin 11	100	1e-75
	2	UN021682	3.52064	4.43388e-08	-0.894965	1	-0.889522	1	0.432897	1		AT4G38460.1	GGR	geranylgeranyl reductase	31.11	4e-23
	2	UN037528	2.45108	0.000151852	-0.0926664	1	-0.743614	1	0.405136	1		---	---	---	---	---
	2	UN018113	2.33558	3.80015e-06	-0.0894716	1	-0.282899	1	---	---		AT5G55090.1	MAPKKK15	mitogen-activated protein kinase kinase kinase 15	55.86	4e-44
	2	UN014252	4.33327	2.69628e-06	-0.554443	1	-1.93004	1	-0.122279	1		AT5G17050.1	UGT78D2	UDP-glucosyl transferase 78D2	47.9	2e-131
	2	UN004417	2.43406	0.00956333	0.0669319	1	-1.19098	1	-0.103922	1		AT5G48050.1	---	CONTAINS InterPro DOMAIN/s: Retrotransposon gag protein (InterPro:IPR005162); BEST Arabidopsis thaliana protein match is: unknown protein (TAIR:AT1G34070.1); Has 1807 Blast hits to 1807 proteins in 277 species: Archae - 0; Bacteria - 0; Metazoa - 736; Fungi - 347; Plants - 385; Viruses - 0; Other Eukaryotes - 339 (source: NCBI BLink).	23.38	7e-09
	2	UN026283	1.02019	0.029506	0.0245016	1	-0.532688	0.989372	---	---		AT2G43710.2	SSI2, FAB2	Plant stearoyl-acyl-carrier-protein desaturase family protein	82.52	4e-127
	2	UN028536	2.22826	0.000320121	0.0409817	1	-1.59075	1	0.209661	1		AT3G21090.1	---	ABC-2 type transporter family protein	44.66	1e-61
	2	UN050744	1.44523	0.00143641	-0.226972	1	-0.849414	0.645523	0.301429	1		AT5G03240.1	UBQ3	polyubiquitin 3	100	1e-111
	2	UN018212	1.45047	0.00289912	0.324359	1	-0.523263	1	-0.0782389	1		AT1G68390.1	---	Core-2/I-branching beta-1,6-N-acetylglucosaminyltransferase family protein	60.45	2e-141
	2	UN031724	2.64935	3.85412e-05	0.305984	1	-0.804582	0.921748	-0.161268	1		AT4G15290.1	ATCSLB05, CSLB05, ATCSLB5	Cellulose synthase family protein	45.12	3e-19
	2	UN010704	1.29527	0.000988057	0.275961	1	-0.432966	1	0.15064	1		AT3G02360.2	---	6-phosphogluconate dehydrogenase family protein	88.75	0
	2	UN033490	2.12923	0.0153559	0.456477	1	-0.56979	1	0.502527	1		AT1G09250.1	---	basic helix-loop-helix (bHLH) DNA-binding superfamily protein	41.53	4e-15
	2	UN008885	1.56771	1.30772e-05	0.237032	1	-0.382996	1	0.129955	1		AT1G44350.1	ILL6	IAA-leucine resistant (ILR)-like gene 6	68.34	0
	2	UN008922	1.46699	0.00371197	0.25582	1	-0.288034	1	0.167432	1		AT3G19540.1	---	Protein of unknown function (DUF620)	64.19	0
	2	UN027933	1.32308	0.0179345	0.205297	1	-0.220947	1	0.0307628	1		AT2G33590.1	---	NAD(P)-binding Rossmann-fold superfamily protein	60.48	3e-76
	2	UN045096	3.12767	0.0202878	0.421247	1	-0.426365	1	0.144166	1		AT5G62150.1	---	peptidoglycan-binding LysM domain-containing protein	54.35	3e-13
	2	UN007644	2.37912	0.0203422	0.41361	1	-1.25081	0.454012	0.395036	1		AT2G39130.1	---	Transmembrane amino acid transporter family protein	66.97	0
	2	UN020432	2.24233	0.037242	0.388067	1	-1.06663	1	0.329463	1		AT4G29930.3	---	basic helix-loop-helix (bHLH) DNA-binding superfamily protein	47.6	2e-61
	2	UN008021	2.33909	0.00830728	0.776087	1	-1.23263	0.631576	0.192345	1		AT1G70230.1	TBL27	TRICHOME BIREFRINGENCE-LIKE 27	59.31	1e-150
	2	UN024460	1.45843	0.0290738	0.473614	1	-0.703257	1	0.310323	1		AT2G39020.1	---	Acyl-CoA N-acyltransferases (NAT) superfamily protein	62.56	4e-91
	2	UN009999	1.60929	0.00261183	0.465493	1	-0.710801	0.438211	0.189615	1		AT5G07990.1	TT7, CYP75B1, D501	Cytochrome P450 superfamily protein	41.09	5e-123
	2	UN029080	2.24779	0.0120963	0.626108	1	-0.975803	1	---	---		AT3G21090.1	---	ABC-2 type transporter family protein	44.66	1e-61
	2	UN016677	2.45814	0.000622268	0.400567	1	-1.02214	1	0.73857	1		AT3G57120.1	---	Protein kinase superfamily protein	52	2e-119
	2	UN063205	1.2803	0.000506196	0.0574448	1	-0.782301	0.716371	---	---		AT4G05050.1	UBQ11	ubiquitin 11	100	7e-77
	2	UN009807	2.07019	0.0400948	-0.0718069	1	0.224915	1	0.0439233	1		AT3G61510.1	ACS1, AT-ACS1	ACC synthase 1	61.19	0
	2	UN022695	1.87659	0.00429525	-0.0456957	1	0.023897	1	-0.428642	1		AT5G56260.1	---	Ribonuclease E inhibitor RraA/Dimethylmenaquinone methyltransferase	78.92	1e-93
	2	UN020048	2.538	0.0175528	-0.329053	1	0.377698	1	-0.85939	1		AT4G21440.1	ATMYB102, ATM4, MYB102	MYB-like 102	49.61	9e-96
	2	UN033411	1.3208	0.0106475	-0.0928267	1	0.252818	1	-0.375302	1		---	---	---	---	---
	2	UN016929	2.06121	2.55303e-11	0.418981	1	0.429903	1	0.0617927	1		AT1G24620.1	---	EF hand calcium-binding protein family	54.41	8e-50
	2	UN014044	1.82582	4.90788e-07	0.489326	1	-0.453766	1	-1.06172	0.724655		AT1G04530.1	TPR4	Tetratricopeptide repeat (TPR)-like superfamily protein	41.06	3e-35
	2	UN019218	2.34558	0.000550469	0.604532	1	-0.713426	1	-1.18553	1		AT5G06900.1	CYP93D1	cytochrome P450, family 93, subfamily D, polypeptide 1	47.79	7e-143
	2	UN027709	2.14874	7.33752e-06	0.594971	1	-0.632954	1	-0.881502	1		---	---	---	---	---
	2	UN027987	1.2999	0.0221153	0.472341	1	-0.261599	1	-0.667523	1		AT3G23220.1	---	Integrase-type DNA-binding superfamily protein	80	3e-24
	2	UN010472	1.15017	0.00151245	0.24901	1	-0.323402	1	-0.35957	1		AT2G41380.1	---	S-adenosyl-L-methionine-dependent methyltransferases superfamily protein	59.47	4e-113
	2	UN004321	1.99984	0.00317937	0.0216536	1	-0.517844	1	-0.754968	1		AT1G79900.1	ATMBAC2, BAC2	Mitochondrial substrate carrier family protein	70.03	6e-142
	2	UN025891	3.38681	0.912099	-0.0128267	1	-1.13774	1	-1.80829	0.00325833		AT4G39400.1	BRI1, CBB2, DWF2, BIN1, ATBRI1	Leucine-rich receptor-like protein kinase family protein	38.38	9e-44
	2	UN022964	2.06167	1	0.114206	1	---	---	-1.38268	0.00175014		AT5G07500.1	PEI1	Zinc finger C-x8-C-x5-C-x3-H type family protein	66.94	7e-57
	2	UN005930	1.72778	0.0305543	0.402791	1	-0.0333341	1	-0.168464	1		AT3G13320.1	CAX2, atcax2	cation exchanger 2	73.7	0
	2	UN014311	1.38068	0.00290282	0.479369	1	-0.210991	1	-0.323673	1		AT4G28190.2	ULT1	Developmental regulator, ULTRAPETALA	59.23	1e-93
	2	UN010241	1.36789	0.000755302	0.353525	1	-0.183345	1	-0.263541	1		AT5G62790.2	DXR	1-deoxy-D-xylulose 5-phosphate reductoisomerase	82.33	0
	2	UN017783	1.60083	0.0405878	0.405634	1	-0.275633	1	-0.134565	1		AT1G68440.1	---	unknown protein; BEST Arabidopsis thaliana protein match is: unknown protein (TAIR:AT1G25400.2); Has 86 Blast hits to 86 proteins in 29 species: Archae - 0; Bacteria - 6; Metazoa - 27; Fungi - 11; Plants - 24; Viruses - 0; Other Eukaryotes - 18 (source: NCBI BLink).	34.15	4e-08
	2	UN010009	1.98084	1.58232e-05	1.13487	1	-0.0903527	1	-0.375302	1		AT4G17090.1	CT-BMY, BAM3, BMY8	chloroplast beta-amylase	70.79	0
	2	UN025265	1.41601	0.0326167	0.844356	1	-0.139451	1	-0.34685	1		AT5G17280.1	---	CONTAINS InterPro DOMAIN/s: Oxidoreductase-like, N-terminal (InterPro:IPR019180); Has 1807 Blast hits to 1807 proteins in 277 species: Archae - 0; Bacteria - 0; Metazoa - 736; Fungi - 347; Plants - 385; Viruses - 0; Other Eukaryotes - 339 (source: NCBI BLink).	95.83	1e-12
	2	UN026781	1.72452	0.011811	1.00507	0.981544	-0.188876	1	-0.375302	1		AT5G13080.1	WRKY75, ATWRKY75	WRKY DNA-binding protein 75	85.39	5e-55
	2	UN037351	1.9831	1.51279e-05	0.88254	1	-0.119987	1	-0.557934	1		---	---	---	---	---
	2	UN002762	1.69739	0.00037897	0.545872	1	0.0320958	1	-1.02129	1		AT1G78780.2	---	pathogenesis-related family protein	70.13	2e-118
	2	UN014227	1.98433	0.0202389	0.699734	1	0.023752	1	-0.802319	0.891772		AT5G51160.1	---	Ankyrin repeat family protein	29.21	3e-33
	2	UN027060	2.20248	2.26064e-11	0.361592	1	0.333808	1	-0.690659	1		AT2G36430.1	---	Plant protein of unknown function (DUF247)	36.57	3e-44
	2	UN066741	2.20206	0.00189581	0.47128	1	0.15616	1	-0.721081	1		AT4G05050.1	UBQ11	ubiquitin 11	100	7e-72
	2	UN006817	0.937507	0.406244	1.13874	0.0469463	-1.40982	0.00473323	-0.906949	1		AT3G48990.1	---	AMP-dependent synthetase and ligase family protein	75.44	0
	2	UN029002	1.34671	0.0292003	0.903319	1	-1.57824	0.344168	-0.9398	1		AT2G04520.1	---	Nucleic acid-binding, OB-fold-like protein	90.48	9e-67
	2	UN019911	1.07973	0.00937571	1.33086	0.773209	-0.702951	0.987845	-0.370469	1		AT4G25780.1	---	CAP (Cysteine-rich secretory proteins, Antigen 5, and Pathogenesis-related 1 protein) superfamily protein	57.69	7e-78
	2	UN025243	2.11544	0.0224984	1.90839	1	-1.73264	0.2491	-0.722308	1		AT2G41010.1	ATCAMBP25, CAMBP25	calmodulin (CAM)-binding protein of 25 kDa	46.32	5e-16
	2	UN030728	2.06507	0.000181268	1.96313	0.410885	-1.43056	0.78778	-0.925152	1		AT3G05975.1	---	Late embryogenesis abundant (LEA) hydroxyproline-rich glycoprotein family	37.11	2e-34
	2	UN017964	1.84583	0.000568466	0.892579	1	-1.13251	0.41551	-0.256293	1		---	---	---	---	---
	2	UN021022	1.66988	0.000718336	0.528513	1	-1.00597	0.53442	-0.351246	1		AT2G21620.2	RD2	Adenine nucleotide alpha hydrolases-like superfamily protein	78.26	2e-79
	2	UN008536	1.50959	0.0290738	0.494129	1	-0.600785	1	-0.224098	1		AT3G61590.1	HWS, HS	Galactose oxidase/kelch repeat superfamily protein	62.95	0
	2	UN018555	1.51185	0.00620878	0.649549	1	-0.778202	1	-0.287192	1		AT2G45210.1	---	SAUR-like auxin-responsive protein family	48.33	4e-25
	2	UN022877	2.53481	0.0488507	0.943213	1	-1.27148	1	-0.60368	1		AT4G28250.1	ATEXPB3, EXPB3, ATHEXP BETA 1.6	expansin B3	78.02	7e-115
	2	UN014483	1.63883	2.32123e-06	0.984453	1	-1.13944	0.170207	-0.51466	1		AT1G13700.1	PGL1	6-phosphogluconolactonase 1	66.67	2e-115
	2	UN021906	1.65662	0.000808312	0.724329	1	-1.1691	0.246432	-0.544926	1		AT2G04240.1	XERICO	RING/U-box superfamily protein	78.05	2e-12
	2	UN034360	2.12731	0.00753901	1.37213	1	-2.02342	0.580466	-0.634188	1		AT3G27400.1	---	Pectin lyase-like superfamily protein	78.91	4e-76
	2	UN015655	0.804969	0.0459211	0.531201	1	-0.397142	1	-0.994081	1		AT4G17280.1	---	Auxin-responsive family protein	54.4	4e-127
	2	UN012716	1.26787	0.00916639	0.568987	1	-0.930911	0.729855	-1.8446	0.00733844		AT4G05120.1	ENT3, FUR1, ATENT3	Major facilitator superfamily protein	69.4	0
	2	UN017021	1.11948	0.00463571	0.374829	1	-0.873017	0.916163	-1.48419	1		AT2G23620.1	ATMES1, MES1	methyl esterase 1	56.03	1e-100
	2	UN015976	1.17581	0.00389608	0.714425	1	-0.968321	0.618696	-1.67855	1		AT1G67750.1	---	Pectate lyase family protein	83.55	0
	2	UN011267	1.19138	8.36434e-05	0.582897	1	-1.09961	0.0746519	-1.60057	1		AT3G61440.1	ATCYSC1, ARATH;BSAS3;1, CYSC1	cysteine synthase C1	78.87	0
	2	UN021131	1.42303	0.87365	0.647626	1	-1.04087	1	-1.68614	0.0428046		---	---	---	---	---
	2	UN010689	1.33916	0.01066	0.385253	1	-0.724496	1	-0.851875	1		AT4G19460.1	---	UDP-Glycosyltransferase superfamily protein	62.85	0
	2	UN012480	1.94638	0.00243181	0.734725	1	-1.42849	0.253586	-1.3541	1		AT5G64230.1	---	unknown protein; FUNCTIONS IN: molecular_function unknown; INVOLVED IN: biological_process unknown; LOCATED IN: endomembrane system; EXPRESSED IN: 9 plant structures; EXPRESSED DURING: 4 anthesis, petal differentiation and expansion stage; BEST Arabidopsis thaliana protein match is: unknown protein (TAIR:AT3G19920.1); Has 35333 Blast hits to 34131 proteins in 2444 species: Archae - 798; Bacteria …	41.87	1e-65
	2	UN012653	1.28654	0.0462568	0.329037	1	-0.946657	1	-0.890108	1		AT4G36930.1	SPT	basic helix-loop-helix (bHLH) DNA-binding superfamily protein	81.01	1e-37
	2	UN017955	1.02732	0.035546	0.574286	1	-0.545611	1	-0.800558	1		AT2G01490.1	---	phytanoyl-CoA dioxygenase (PhyH) family protein	70.11	1e-151
	2	UN007148	1.73031	0.0307229	0.765441	1	-0.260908	1	-1.69857	1		AT1G13740.1	AFP2	ABI five binding protein 2	40.05	2e-49
	2	UN024210	1.9659	0.000134796	0.803526	1	-0.711247	1	-1.6257	1		AT4G14305.1	---	Peroxisomal membrane 22 kDa (Mpv17/PMP22) family protein	79.46	3e-113
	2	UN024489	1.36456	0.00805293	0.44226	1	-0.336401	1	-1.09253	1		---	---	---	---	---
	2	UN013582	1.5018	1.06733e-05	0.236498	1	-0.302372	1	-1.42475	1		AT1G68320.1	MYB62, AtMYB62, BW62B, BW62C	myb domain protein 62	77.7	1e-78
	2	UN029123	1.42235	8.49597e-05	0.372611	1	-0.336732	1	-1.59584	1		AT5G13080.1	WRKY75, ATWRKY75	WRKY DNA-binding protein 75	84.44	1e-53
	2	UN070058	1.60085	0.00065554	0.420422	1	-0.618103	1	-1.85354	1		AT4G05050.1	UBQ11	ubiquitin 11	100	7e-66
	2	UN012059	0.98188	0.00944998	1.47434	0.00486246	-0.770698	0.969513	-0.0517038	1		---	---	---	---	---
	2	UN008447	1.52178	0.0190257	1.68083	0.568255	-0.66786	1	0.216989	1		AT1G64890.1	---	Major facilitator superfamily protein	56.45	5e-153
	2	UN028811	1.62516	0.0128089	2.17782	0.297424	-1.12132	0.942847	0.399433	1		AT4G31940.1	CYP82C4	cytochrome P450, family 82, subfamily C, polypeptide 4	50.92	6e-81
	2	UN000942	0.975956	0.0140489	0.69986	1	-0.440869	1	0.0937012	1		AT4G38060.2	---	unknown protein; BEST Arabidopsis thaliana protein match is: unknown protein (TAIR:AT5G65480.1); Has 35333 Blast hits to 34131 proteins in 2444 species: Archae - 798; Bacteria - 22429; Metazoa - 974; Fungi - 991; Plants - 531; Viruses - 0; Other Eukaryotes - 9610 (source: NCBI BLink).	45.45	6e-15
	2	UN005794	1.9587	4.91888e-08	1.37245	0.589476	-1.13695	0.213583	0.060545	1		AT5G11880.1	---	Pyridoxal-dependent decarboxylase family protein	24.3	1e-06
	2	UN011088	1.87494	0.0168575	1.55236	0.388962	-1.16402	0.42248	-0.255439	1		AT5G17050.1	UGT78D2	UDP-glucosyl transferase 78D2	45.25	2e-125
	2	UN023533	2.01301	2.3251e-05	1.87919	0.646506	-1.01165	0.694136	-0.00318098	1		AT1G46264.1	AT-HSFB4, HSFB4, SCZ	heat shock transcription factor B4	36	6e-41
	2	UN028381	1.80469	0.0104317	1.57843	1	-0.810171	0.811544	-0.116618	1		AT1G59960.1	---	NAD(P)-linked oxidoreductase superfamily protein	55.17	2e-52
	2	UN005886	2.36536	2.12158e-09	1.16719	1	-0.831542	1	-0.476462	1		---	---	---	---	---
	2	UN036269	2.5262	0.00135012	1.49388	1	-1.1369	1	-0.509347	1		AT1G74660.1	MIF1	mini zinc finger 1	73.08	1e-24
	2	UN010550	2.04184	0.0130536	0.883933	1	-0.636852	1	-0.192809	1		AT3G61510.1	ACS1, AT-ACS1	ACC synthase 1	63.47	0
	2	UN028485	2.11398	0.000294959	1.17031	1	-0.565106	1	-0.255082	1		AT5G43150.1	---	unknown protein; FUNCTIONS IN: molecular_function unknown; INVOLVED IN: biological_process unknown; LOCATED IN: mitochondrion; EXPRESSED IN: 22 plant structures; EXPRESSED DURING: 13 growth stages; Has 1807 Blast hits to 1807 proteins in 277 species: Archae - 0; Bacteria - 0; Metazoa - 736; Fungi - 347; Plants - 385; Viruses - 0; Other Eukaryotes - 339 (source: NCBI BLink).	35	2e-11
	2	UN006533	1.15902	0.024164	0.561415	1	-0.313154	1	-0.19612	1		AT1G70520.1	CRK2	cysteine-rich RLK (RECEPTOR-like protein kinase) 2	46.41	0
	2	UN012870	1.53502	0.0200419	1.41056	1	-0.402022	1	0.109088	1		AT5G26660.1	ATMYB86, MYB86	myb domain protein 86	67.46	2e-80
	2	UN011203	1.3106	0.00384084	1.1989	0.0654288	-0.197472	1	-0.114544	1		AT1G64940.1	CYP89A6	cytochrome P450, family 87, subfamily A, polypeptide 6	56.13	0
	2	UN009048	1.15767	0.0260806	0.689	1	-0.121353	1	-0.0129028	1		AT1G51340.2	---	MATE efflux family protein	67.73	0
	2	UN011393	1.05944	0.0469264	0.67146	1	-0.134004	1	0.00602858	1		AT5G54840.1	ATSGP1, SGP1	Ras-related small GTP-binding family protein	62.45	9e-105
	2	UN018425	1.63171	0.0355795	1.22683	1	-0.0315004	1	-0.228545	1		---	---	---	---	---
	2	UN063547	1.46416	0.00243181	0.896336	0.868911	-0.168157	1	---	---		AT4G05050.1	UBQ11	ubiquitin 11	100	4e-76
	2	UN010494	1.35537	0.00012593	0.842865	1	-0.347644	1	-0.484667	1		AT4G09150.2	---	T-complex protein 11	50.78	2e-142
	2	UN018326	1.52401	0.0043537	1.11608	0.577546	-0.310021	1	-0.595836	1		AT1G76980.1	---	BEST Arabidopsis thaliana protein match is: embryo defective 2170 (TAIR:AT1G21390.1); Has 65 Blast hits to 65 proteins in 23 species: Archae - 0; Bacteria - 8; Metazoa - 1; Fungi - 8; Plants - 40; Viruses - 3; Other Eukaryotes - 5 (source: NCBI BLink).	43.33	8e-24
	2	UN005583	1.15799	0.000780076	0.728777	0.797492	-0.400185	1	---	---		AT4G32940.1	GAMMA-VPE, GAMMAVPE	gamma vacuolar processing enzyme	69.76	0
	2	UN016228	1.79501	0.000899922	1.12304	1	-0.638319	1	-1.41931	0.0727568		AT2G43120.1	---	RmlC-like cupins superfamily protein	67.57	3e-145
	2	UN020193	1.55599	0.000181796	1.06729	0.393312	-0.442123	1	-1.01103	1		AT3G02520.1	GRF7, GF14 NU	general regulatory factor 7	86.54	4e-165
	2	UN031489	1.60228	0.00195422	1.37181	1	-0.407694	1	-1.11285	1		AT3G54040.1	---	PAR1 protein	58.79	5e-70
	2	UN021774	1.4435	2.65025e-05	0.68251	1	-0.125275	1	---	---		AT3G21360.1	---	2-oxoglutarate (2OG) and Fe(II)-dependent oxygenase superfamily protein	60.97	2e-135
	2	UN022322	1.898	0.000209491	1.08556	1	-0.262331	1	-0.997401	1		AT2G38740.1	---	Haloacid dehalogenase-like hydrolase (HAD) superfamily protein	64.94	9e-102
	2	UN014419	1.52569	0.0215092	0.832558	1	-0.0911638	1	-1.06779	0.574879		AT4G36380.1	ROT3	Cytochrome P450 superfamily protein	66.52	6e-105
	2	UN032765	1.35782	0.00195681	0.762367	0.79712	0.0427458	1	-0.816519	1		AT5G13490.1	AAC2	ADP/ATP carrier 2	92.36	2e-93
	2	UN021888	1.49863	0.129589	1.46624	0.0303938	0.0100491	1	---	---		AT2G41690.1	AT-HSFB3, HSFB3	heat shock transcription factor B3	52.66	1e-58
	2	UN013368	1.45311	0.0143978	1.18147	1	-0.103644	1	-0.378412	1		AT5G02800.1	---	Protein kinase superfamily protein	76.74	0
	2	UN011298	0.892194	1	1.76393	0.0178396	0.185132	1	0.159514	1		AT1G34190.1	anac017, NAC017	NAC domain containing protein 17	37.16	2e-12
	2	UN009245	0.642033	1	1.35911	0.00311136	0.703535	0.706975	0.255989	1		AT5G42240.1	scpl42	serine carboxypeptidase-like 42	67.34	0
	2	UN030122	0.534055	0.602767	1.2636	0.0130241	0.617673	0.905437	0.0897838	1		AT5G41340.1	UBC4, ATUBC4	ubiquitin conjugating enzyme 4	78.29	1e-93
	2	UN028996	2.00969	1.06578e-07	0.0873822	1	1.12972	0.277405	-0.0629892	1		AT1G35210.1	---	unknown protein; FUNCTIONS IN: molecular_function unknown; INVOLVED IN: biological_process unknown; LOCATED IN: chloroplast; EXPRESSED IN: 14 plant structures; EXPRESSED DURING: 9 growth stages; CONTAINS InterPro DOMAIN/s: Protein of unknown function DUF740 (InterPro:IPR008004); BEST Arabidopsis thaliana protein match is: unknown protein (TAIR:AT1G22470.1); Has 83 Blast hits to 83 proteins in 12 …	63.33	1e-07
	2	UN057074	1.07267	0.0285375	0.697486	1	0.472724	1	---	---		AT4G05050.1	UBQ11	ubiquitin 11	100	9e-65
	2	UN016145	1.7366	3.12479e-05	0.698637	0.662971	0.234429	1	-0.34139	1		AT3G04070.1	anac047, NAC047	NAC domain containing protein 47	48.52	9e-101
	2	UN054589	1.81768	0.010133	0.634613	1	0.360028	1	-0.2516	1		AT2G32300.1	UCC1	uclacyanin 1	42.86	9e-24
	2	UN000338	1.86791	1.07945e-09	0.793621	1	0.159493	1	-0.141358	1		AT1G15520.1	PDR12, ATPDR12, ABCG40, ATABCG40	pleiotropic drug resistance 12	69.85	0
	2	UN001166	0.829659	0.0395078	0.392112	1	-0.00332955	1	-0.0914351	1		AT2G38800.1	---	Plant calmodulin-binding protein-related	55.66	2e-29
	2	UN043516	0.286111	1	1.6986	0.0469463	0.589265	1	1.34505	1		AT2G26640.1	KCS11	3-ketoacyl-CoA synthase 11	82.8	5e-54
	2	UN006231	0.950108	0.134902	-0.00238611	1	1.28424	0.0228005	0.739872	1		AT4G26850.1	VTC2	mannose-1-phosphate guanylyltransferase (GDP)s;GDP-galactose:mannose-1-phosphate guanylyltransferases;GDP-galactose:glucose-1-phosphate guanylyltransferases;GDP-galactose:myoinositol-1-phosphate guanylyltransferases;glucose-1-phosphate guanylyltransferase	71.25	0
	2	UN036888	0.0700267	1	0.187327	1	1.09522	1	1.33283	0.0348959		---	---	---	---	---
	2	UN055811	-0.146241	1	0.347543	1	---	---	1.934	0.00123871		---	---	---	---	---
	2	UN041127	-0.135331	1	---	---	---	---	1.82411	0.0114532		AT1G07570.3	APK1A	Protein kinase superfamily protein	69.35	3e-20
	2	UN008102	1.91529	0.00062242	-0.461962	1	0.652195	1	0.491426	1		---	---	---	---	---
	2	UN011534	1.11253	0.0491978	-0.21636	1	0.700098	0.835727	0.47824	1		AT3G23560.1	ALF5	MATE efflux family protein	59.79	0
	2	UN000022	1.10404	0.00891265	-0.0676924	1	0.678996	1	1.32437	0.386289		AT1G03060.1	SPI	Beige/BEACH domain ;WD domain, G-beta repeat protein	70.84	0
	2	UN008228	2.90278	0.236269	-0.529475	1	0.652354	1	1.88565	0.0435478		---	---	---	---	---
	2	UN013545	2.26653	0.00089528	-0.498541	1	0.587835	1	1.48877	0.606502		AT5G52400.1	CYP715A1	cytochrome P450, family 715, subfamily A, polypeptide 1	54.74	0
	2	UN017645	2.6548	3.80185e-05	-0.470764	1	1.02939	0.926888	---	---		AT5G21960.1	---	Integrase-type DNA-binding superfamily protein	65.52	1e-40
	2	UN002853	2.68549	0.0395343	-1.19474	0.981958	0.13561	1	2.51009	0.139965		ATMG00560.1	RPL2	Nucleic acid-binding, OB-fold-like protein	69.86	4e-154
	2	UN003669	1.25072	0.0350418	-0.631079	1	0.0243986	1	0.43993	1		AT5G48380.1	BIR1	BAK1-interacting receptor-like kinase 1	61.21	0
	2	UN011996	3.11495	0.000339552	-1.02152	1	-0.416005	1	1.44349	1		AT5G42650.1	AOS, CYP74A, DDE2	allene oxide synthase	58.03	9e-177
	2	UN023639	5.86796	4.55741e-07	-1.59707	1	-1.36447	1	2.23811	1		AT3G01680.1	---	CONTAINS InterPro DOMAIN/s: Mediator complex subunit Med28 (InterPro:IPR021640); BEST Arabidopsis thaliana protein match is: unknown protein (TAIR:AT3G01670.1); Has 122 Blast hits to 112 proteins in 13 species: Archae - 0; Bacteria - 0; Metazoa - 0; Fungi - 0; Plants - 122; Viruses - 0; Other Eukaryotes - 0 (source: NCBI BLink).	31.55	9e-48
	2	UN005604	1.10928	0.0246621	0.640252	1	-0.464737	1	0.882213	0.911998		AT2G22480.1	PFK5	phosphofructokinase 5	73.73	0
	2	UN005321	0.996259	0.0168575	0.278893	1	-0.361139	1	0.8535	0.974363		AT1G64390.1	AtGH9C2, GH9C2	glycosyl hydrolase 9C2	73.88	0
	2	UN029124	1.65898	6.77599e-07	0.785678	1	-0.530032	1	1.47121	1		AT5G13080.1	WRKY75, ATWRKY75	WRKY DNA-binding protein 75	84.44	8e-54
	2	UN029937	2.18569	0.0450954	0.809835	1	-0.629141	1	2.23811	1		AT1G56150.1	---	SAUR-like auxin-responsive protein family	68.75	1e-44
	2	UN000396	1.80877	0.000127721	0.0599382	1	-0.51798	1	0.959694	0.601158		---	---	---	---	---
	2	UN017968	1.81431	0.00023569	0.536357	1	-0.746538	1	0.917278	0.724059		AT2G44160.1	MTHFR2	methylenetetrahydrofolate reductase 2	57.83	1e-131
	2	UN017746	2.08626	4.55741e-07	0.550281	1	-0.458616	1	1.13718	1		AT5G57150.4	---	basic helix-loop-helix (bHLH) DNA-binding superfamily protein	54.75	4e-60
	2	UN033178	1.39827	0.0237746	0.356397	1	-0.473631	1	0.848062	1		AT4G34050.1	CCoAOMT1	S-adenosyl-L-methionine-dependent methyltransferases superfamily protein	91.84	1e-29
	2	UN000371	1.22575	0.00342959	0.100769	1	0.0917988	1	0.794556	0.969704		AT3G21250.2	MRP6, ABCC8	multidrug resistance-associated protein 6	61.44	0
	2	UN001733	2.66316	0.019249	0.329405	1	0.118484	1	1.34566	1		AT4G20140.1	GSO1	Leucine-rich repeat transmembrane protein kinase	49.37	0
	2	UN019005	2.50978	6.00515e-07	0.36043	1	0.226924	1	2.16316	0.233251		AT3G56400.1	WRKY70, ATWRKY70	WRKY DNA-binding protein 70	40	4e-32
	2	UN041130	1.8235	1	0.0416614	1	-0.174954	1	1.53887	0.00485983		AT4G31540.1	ATEXO70G1, EXO70G1	exocyst subunit exo70 family protein G1	69.41	2e-81
	2	UN006835	1.01869	0.0168553	-0.129601	1	0.0162762	1	0.68983	1		AT1G69560.1	MYB105, LOF2, ATMYB105	myb domain protein 105	84.43	6e-67
	2	UN009299	1.86195	1	-0.142563	1	---	---	1.65022	0.0307142		AT1G61680.1	TPS14, ATTPS14	terpene synthase 14	45.89	2e-143
	2	UN007600	1.50786	1.6244e-05	0.633536	1	0.111829	1	1.01723	1		AT1G22015.1	DD46	Galactosyltransferase family protein	38.89	4e-18
	2	UN015060	1.42071	0.00205927	0.686926	1	0.241961	1	0.791566	1		AT2G16050.1	---	Cysteine/Histidine-rich C1 domain family protein	43.64	2e-57
	2	UN024680	1.15973	0.00136809	0.68572	1	0.0956202	1	0.65315	1		AT5G59890.1	ADF4, ATADF4	actin depolymerizing factor 4	81.29	9e-87
	2	UN000417	1.34122	0.0346924	0.654915	1	0.462538	1	0.451224	1		AT1G20780.1	PUB44, ATPUB44, SAUL1	senescence-associated E3 ubiquitin ligase 1	29.67	6e-62
	2	UN059422	1.24274	0.0256524	0.645251	1	0.344431	1	0.656736	1		AT4G05050.1	UBQ11	ubiquitin 11	100	2e-85
	2	UN009918	1.08444	0.0315045	0.274692	1	0.307984	1	0.418796	1		AT2G02220.1	ATPSKR1, PSKR1	phytosulfokin receptor 1	50.95	3e-111
	2	UN016004	1.61426	0.00109545	0.424813	1	0.240842	1	0.301429	1		AT1G55920.1	ATSERAT2;1, SAT5, SAT1, SERAT2;1	serine acetyltransferase 2;1	69.77	1e-131
	2	UN026371	1.43683	0.00332143	0.028104	1	0.559168	1	0.471206	1		AT3G14770.1	SWEET2, AtSWEET2	Nodulin MtN3 family protein	63.51	9e-95
	2	UN023551	1.49418	0.00137163	0.938443	1	0.153818	1	0.690046	1		AT5G49620.2	MYB78	myb domain protein 78	67.87	2e-89
	2	UN006404	1.36946	2.12392e-05	0.491363	1	0.0455702	1	0.24217	1		---	---	---	---	---
	2	UN008693	1.27093	0.0378983	0.414405	1	-0.0252854	1	0.159957	1		AT3G19380.1	PUB25	plant U-box 25	34.86	2e-07
	2	UN017690	1.15341	0.00920354	0.485318	1	-0.0798795	1	0.179965	1		AT2G43320.1	---	S-adenosyl-L-methionine-dependent methyltransferases superfamily protein	72.52	1e-171
	2	UN012849	2.18401	7.90794e-11	0.96641	0.950485	-0.55382	1	0.120145	1		AT1G13080.1	CYP71B2	cytochrome P450, family 71, subfamily B, polypeptide 2	44.32	7e-71
	2	UN027194	1.79027	0.00602792	0.898079	0.553119	-0.303904	1	0.301429	1		AT5G13080.1	WRKY75, ATWRKY75	WRKY DNA-binding protein 75	85.39	5e-55
	2	UN019503	1.44447	0.000528968	0.478931	1	-0.129862	1	0.586774	1		AT1G13360.1	---	unknown protein; BEST Arabidopsis thaliana protein match is: unknown protein (TAIR:AT3G25870.1); Has 69 Blast hits to 69 proteins in 16 species: Archae - 0; Bacteria - 0; Metazoa - 6; Fungi - 0; Plants - 63; Viruses - 0; Other Eukaryotes - 0 (source: NCBI BLink).	40.22	4e-21
	2	UN026090	2.41446	4.01697e-05	0.944876	1	-0.305053	1	0.721726	0.968218		AT5G52390.1	---	PAR1 protein	64.19	5e-67
	2	UN045640	2.42023	0.0135675	0.534235	1	-0.31089	1	0.768409	1		AT5G62150.1	---	peptidoglycan-binding LysM domain-containing protein	51.02	1e-13
	2	UN004263	1.20913	0.00593611	0.830246	1	-0.536157	1	0.470941	1		---	---	---	---	---
	2	UN009421	1.31701	0.0232537	0.735313	1	-0.626793	1	0.427885	1		AT4G26180.1	---	Mitochondrial substrate carrier family protein	69.55	4e-155
	2	UN012565	1.77548	0.029506	1.03197	1	-0.242504	1	0.550587	1		AT4G05200.1	CRK25	cysteine-rich RLK (RECEPTOR-like protein kinase) 25	49.4	0
	2	UN016350	1.3169	0.00675538	0.75256	1	-0.0862712	1	0.355328	1		AT5G60900.1	RLK1	receptor-like protein kinase 1	56.25	1e-113
	2	UN012076	1.18284	0.0184986	0.782138	1	-0.33097	1	0.395147	1		AT3G54110.1	ATPUMP1, UCP, PUMP1, ATUCP1, UCP1	plant uncoupling mitochondrial protein 1	84.06	9e-164
	2	UN022698	2.20094	0.0001332	1.14242	0.186092	-0.565195	1	0.570999	1		AT4G37690.1	---	Galactosyl transferase GMA12/MNN10 family protein	25	1e-07
	2	UN015927	1.56972	0.0236134	1.53292	1	-0.440015	1	0.485342	1		AT1G07430.1	HAI2	highly ABA-induced PP2C gene 2	61.73	1e-128
	2	UN019606	1.31533	0.0110782	1.19551	0.379162	-0.311542	1	0.404901	1		AT5G16120.2	---	alpha/beta-Hydrolases superfamily protein	66.56	6e-169
	2	UN029901	1.20657	0.00955159	0.972327	0.620749	-0.39195	1	---	---		AT3G51030.1	ATTRX1, ATTRX H1, TRX1	thioredoxin H-type 1	69.16	2e-52
	2	UN013949	1.12859	0.0113276	0.979142	0.318881	0.245687	1	---	---		AT5G65210.2	TGA1	bZIP transcription factor family protein	64.96	1e-161
	2	UN003051	1.13736	0.00175978	0.869899	1	0.430531	0.981191	0.227659	1		AT5G19450.1	CDPK19, CPK8	calcium-dependent protein kinase 19	78.87	0
	2	UN008274	1.39393	0.000391202	0.864663	0.738754	0.610328	1	0.207013	1		AT5G13180.1	ANAC083, VNI2, NAC083	NAC domain containing protein 83	66.15	5e-88
	2	UN017849	1.17359	0.00132205	1.18662	0.0950557	0.788139	1	0.36765	1		AT1G30040.1	ATGA2OX2, GA2OX2	gibberellin 2-oxidase	56.63	2e-136
	2	UN011024	0.897849	0.0448902	0.825119	1	-0.0394644	1	0.306809	1		AT2G13650.1	GONST1	golgi nucleotide sugar transporter 1	78.93	4e-177
	2	UN032944	1.45131	0.0297761	1.37546	1	-0.130126	1	0.209661	1		---	---	---	---	---
	2	UN007596	1.38368	0.0112911	0.968357	1	0.230703	1	0.10363	1		AT5G37260.1	RVE2, CIR1	Homeodomain-like superfamily protein	62.5	4e-37
	2	UN049570	1.41519	0.0322164	1.0425	1	0.252707	1	0.301429	1		AT3G52590.1	UBQ1, EMB2167, ERD16, HAP4	ubiquitin extension protein 1	98.08	3e-32
	2	UN004941	1.11745	0.124932	0.366294	1	0.657192	1	1.54129	0.0456666		AT4G23740.1	---	Leucine-rich repeat protein kinase family protein	57.34	0
	2	UN011199	1.52759	7.25863e-05	0.300334	1	0.548669	1	1.8492	0.80157		AT2G18690.1	---	unknown protein; FUNCTIONS IN: molecular_function unknown; INVOLVED IN: biological_process unknown; LOCATED IN: membrane; EXPRESSED IN: 17 plant structures; EXPRESSED DURING: 9 growth stages; CONTAINS InterPro DOMAIN/s: Protein of unknown function DUF975 (InterPro:IPR010380); BEST Arabidopsis thaliana protein match is: unknown protein (TAIR:AT2G18680.1); Has 213 Blast hits to 211 proteins in 20 s…	30.74	2e-29
	2	UN007216	1.26362	0.00601106	0.648292	1	-0.13517	1	1.58567	0.463164		---	---	---	---	---
	2	UN015173	1.7995	6.56779e-09	0.695044	1	0.00224175	1	1.9055	1		AT2G16130.1	PMT2, ATPMT2	polyol/monosaccharide transporter 2	53.91	7e-131
	2	UN024509	1.49431	0.0395343	0.561297	1	0.157211	1	2.02845	1		AT5G24090.1	ATCHIA, CHIA	chitinase A	62.89	5e-119
	2	UN027757	0.874618	1	0.6602	1	-0.208733	1	1.75145	0.00655819		AT3G20570.1	ENODL9, AtENODL9	early nodulin-like protein 9	58.54	3e-47
	2	UN050815	0.438722	1	---	---	---	---	1.97104	0.0360684		---	---	---	---	---
	2	UN068425	1.1931	1	---	---	0.177249	1	1.87397	0.00134058		AT3G29035.1	ATNAC3, ANAC059, NAC3	NAC domain containing protein 3	74.51	2e-22
	2	UN011893	0.80149	0.037199	0.470467	1	-0.580135	1	2.07177	1		AT5G09810.1	ACT7	actin 7	97.88	0
	2	UN016703	0.977543	0.0187465	0.579722	1	-0.646288	0.901078	---	---		AT1G19180.1	JAZ1, TIFY10A	jasmonate-zim-domain protein 1	53.57	4e-11
	2	UN023107	1.17534	0.00157269	0.337516	1	-1.08118	0.289412	2.53151	0.940543		AT2G21620.2	RD2	Adenine nucleotide alpha hydrolases-like superfamily protein	77.51	5e-84
	2	UN041300	1.85922	1	0.56642	1	-1.05791	1	2.48498	0.00178187		AT1G63980.1	---	D111/G-patch domain-containing protein	67.65	8e-08
	2	UN032330	0.910946	0.0274831	0.311225	1	-0.513578	0.999788	1.65315	1		AT4G02040.1	---	unknown protein; FUNCTIONS IN: molecular_function unknown; INVOLVED IN: biological_process unknown; LOCATED IN: chloroplast; Has 30 Blast hits to 30 proteins in 6 species: Archae - 0; Bacteria - 0; Metazoa - 0; Fungi - 0; Plants - 30; Viruses - 0; Other Eukaryotes - 0 (source: NCBI BLink).	38.3	1e-08
	2	UN043200	1.19072	0.0186451	0.566241	1	-0.784198	1	2.06419	1		AT4G27270.1	---	Quinone reductase family protein	88.48	1e-124
	2	UN018944	1.48712	0.0406689	-0.133144	1	-0.310043	1	2.29536	1		---	---	---	---	---
	2	UN022503	0.885444	0.410168	0.0427055	1	-0.394151	1	1.49988	0.0028662		AT1G79160.1	---	unknown protein; BEST Arabidopsis thaliana protein match is: unknown protein (TAIR:AT1G16500.1); Has 104 Blast hits to 102 proteins in 13 species: Archae - 0; Bacteria - 0; Metazoa - 0; Fungi - 0; Plants - 104; Viruses - 0; Other Eukaryotes - 0 (source: NCBI BLink).	46.01	5e-47
	2	UN021290	0.896381	0.769911	0.284138	1	-0.248584	1	1.47681	0.0167867		AT5G21090.1	---	Leucine-rich repeat (LRR) family protein	68.06	3e-96
	2	UN022145	1.18828	0.193913	0.414849	1	-0.328498	1	2.1217	0.0116901		AT5G49015.1	---	Expressed protein	39.73	6e-09
	2	UN004394	1.60521	0.0079821	0.198465	1	-0.349023	1	1.97508	1		AT4G11570.1	---	Haloacid dehalogenase-like hydrolase (HAD) superfamily protein	63.35	6e-162
	2	UN011212	1.35863	0.000190559	0.233331	1	-0.173069	1	2.0184	1		AT1G75390.1	AtbZIP44, bZIP44	basic leucine-zipper 44	56.15	2e-43
	2	UN032111	2.33014	0.023326	0.312659	1	0.456307	1	---	---		AT5G15290.1	---	Uncharacterised protein family (UPF0497)	31.03	3e-21
	2	UN051168	0.986355	0.0308672	0.0167191	1	-0.799705	0.909438	---	---		AT5G03240.1	UBQ3	polyubiquitin 3	100	8e-110
	2	UN028355	1.06173	0.0370047	0.553294	1	-1.28597	0.0718525	---	---		AT4G15120.1	---	VQ motif-containing protein	84	2e-08
	2	UN020336	0.255905	1	0.153995	1	-0.429062	1	1.5456	0.0254416		AT3G12650.1	---	unknown protein; FUNCTIONS IN: molecular_function unknown; INVOLVED IN: biological_process unknown; LOCATED IN: mitochondrion; EXPRESSED IN: 23 plant structures; EXPRESSED DURING: 15 growth stages; Has 31 Blast hits to 31 proteins in 12 species: Archae - 0; Bacteria - 0; Metazoa - 0; Fungi - 0; Plants - 31; Viruses - 0; Other Eukaryotes - 0 (source: NCBI BLink).	58.87	4e-45
	2	UN030711	0.406604	1	0.230377	1	-0.442039	1	1.68872	0.0359497		AT1G79070.1	---	SNARE-associated protein-related	50.98	1e-09
	2	UN010994	1.61332	0.139156	-1.95651	0.0276085	-1.2242	1	---	---		AT2G07689.1	---	NADH-Ubiquinone/plastoquinone (complex I) protein	94.9	7e-57
	2	UN055809	---	---	-0.755508	1	-0.508848	1	1.98319	0.00193788		---	---	---	---	---
	2	UN015074	0.671497	1	-0.415282	1	-0.407714	1	1.89162	0.0131935		AT5G24318.1	---	O-Glycosyl hydrolases family 17 protein	63.55	0
	2	UN083027	0.840985	1	-0.423694	1	-0.947075	1	2.07534	0.0469814		AT4G05050.1	UBQ11	ubiquitin 11	95.95	9e-46
	2	UN014856	0.906906	1	-0.40054	1	0.154286	1	1.7556	0.00416524		---	---	---	---	---
	2	UN020722	0.971319	1	-0.558263	1	0.0206669	1	2.18465	0.00563369		AT5G63090.2	LOB	Lateral organ boundaries (LOB) domain family protein	88.6	3e-70
	2	UN004632	0.135637	1	0.073412	1	0.0448758	1	1.98302	0.0105517		AT2G44710.1	---	RNA-binding (RRM/RBD/RNP motifs) family protein	48.77	1e-90
	2	UN015070	0.0187274	1	-0.0170227	1	-0.0695351	1	1.45521	0.0326587		AT4G00026.1	---	FUNCTIONS IN: molecular_function unknown; INVOLVED IN: biological_process unknown; LOCATED IN: chloroplast; EXPRESSED IN: cultured cell; CONTAINS InterPro DOMAIN/s: Mitochondrial inner membrane translocase complex, subunit Tim21 (InterPro:IPR013261); Has 35333 Blast hits to 34131 proteins in 2444 species: Archae - 798; Bacteria - 22429; Metazoa - 974; Fungi - 991; Plants - 531; Viruses - 0; Other…	80.12	1e-87
	2	UN004306	0.0397302	1	0.0468783	1	-0.0551423	1	1.82212	0.00986596		AT2G33835.1	FES1	Zinc finger C-x8-C-x5-C-x3-H type family protein	33.46	8e-30
	2	UN016599	-0.0731931	1	0.255853	1	-0.184711	1	1.7518	0.00253376		AT4G10955.1	---	alpha/beta-Hydrolases superfamily protein	58.36	4e-148
	2	UN021839	0.249921	1	0.52562	1	-0.161101	1	1.62952	0.0423348		AT3G10640.1	VPS60.1	SNF7 family protein	80.59	2e-143
	2	UN009496	-0.0065191	1	-0.0608791	1	-0.29886	1	1.95346	0.00150696		AT2G40290.1	---	Eukaryotic translation initiation factor 2 subunit 1	83.19	0
	2	UN005353	-0.0119484	1	0.278288	1	-0.355391	1	1.94737	0.000597443		AT5G65160.1	TPR14	tetratricopeptide repeat (TPR)-containing protein	63.51	6e-161
	2	UN028064	0.0888237	1	0.202576	1	-0.238391	1	1.23323	0.0408243		AT3G10210.1	---	SEC14 cytosolic factor family protein / phosphoglyceride transfer family protein	65.45	7e-111
	2	UN000020	0.668008	0.197284	0.104104	1	0.786573	0.749698	1.3327	0.0139		AT1G55860.1	UPL1	ubiquitin-protein ligase 1	38.33	0
	2	UN014913	0.417519	1	0.610012	1	0.629004	1	1.48474	0.0378092		AT5G09230.7	SRT2	sirtuin 2	73.56	0
	2	UN011347	0.0328721	1	0.583544	1	0.0405313	1	1.51594	0.0326587		AT2G30580.1	DRIP2	DREB2A-interacting protein 2	54.98	5e-151
	2	UN010190	0.267227	1	0.536126	1	0.0499569	1	1.97071	0.00831436		AT2G40090.1	ATATH9, ATH9	ABC2 homolog 9	72.87	0
	2	UN024153	0.406164	1	-3.07413	1	-1.83232	1	2.00222	0.00831436		AT1G68760.1	ATNUDT1, ATNUDX1, NUDX1	nudix hydrolase 1	59.56	7e-57
	2	UN026103	0.63183	1	-3.94738	1	-0.972044	1	2.15037	0.0399836		AT3G63300.1	FKD1	FORKED 1	27.93	1e-07
	2	UN003604	0.795262	1	-2.69341	0.000385553	-1.11466	1	0.761143	1		ATMG00665.1	NAD5B, NAD5.2, NAD5	NADH dehydrogenase 5B	91.71	2e-111
	2	UN010816	0.911558	0.911108	-2.17856	0.0180503	-0.958194	1	0.336123	1		ATMG00900.1	CCB256	cytochrome C biogenesis 256	81.94	2e-115
	2	UN017995	1.21708	1	-3.65078	0.00375551	-1.83798	1	2.32315	1		---	---	---	---	---
	2	UN022280	1.13398	1	-2.69211	0.0655249	-1.24338	1	1.20742	0.0243141		ATMG01320.1	NAD2B, NAD2.2, NAD2	NADH dehydrogenase 2B	92.99	0
	2	UN028398	7.06382	9.07541e-11	-11.6042	5.7911e-63	-4.26639	0.792611	5.29973	0.655241		---	---	---	---	---
	2	UN001514	2.07118	0.027024	-1.53044	0.815398	-1.48823	0.851465	1.59959	0.534318		---	---	---	---	---
	2	UN019640	1.78644	8.89263e-10	-1.78125	0.0249278	-2.53093	0.0023596	1.81348	0.275164		---	---	---	---	---
	2	UN000348	0.770317	0.594611	-2.07184	6.15304e-05	-1.4649	0.355617	2.55788	9.25593e-05		ATMG01170.1	ATP6-2	ATPase, F0 complex, subunit A protein	90.48	2e-124
	2	UN000460	0.862555	0.849628	-1.89019	0.00424323	-1.43178	0.412892	2.5575	9.91636e-05		ATMG00730.1	COX3	cytochrome c oxidase subunit 3	96.15	3e-160
	2	UN006230	1.04716	0.901336	-2.11953	0.0137679	-1.03549	1	2.22143	1		ATMG00665.1	NAD5B, NAD5.2, NAD5	NADH dehydrogenase 5B	95.25	0
	2	UN021176	1.5124	0.390873	-2.25182	0.0438667	-1.49745	1	2.74571	1		---	---	---	---	---
	2	UN001159	1.31689	0.207296	-2.50816	0.00212992	-1.75424	0.299075	2.0842	0.0351789		ATMG00830.1	CCB382	cytochrome C biogenesis 382	83.48	7e-177
	2	UN002040	1.31194	0.133134	-1.88529	0.00241123	-1.38591	0.89001	1.53891	0.336617		ATMG00860.1	ORF158	DNA/RNA polymerases superfamily protein	40.85	7e-31
	2	UN042510	1.62413	0.0546023	-2.56258	5.39817e-06	-1.76788	0.165467	1.9545	0.785363		ATMG00030.1	ORF107A	hypothetical protein	95.16	8e-40
	2	UN013926	2.23934	0.0201917	-2.04934	0.00649599	-1.71078	0.944828	-1.3052	1		ATMG00560.1	RPL2	Nucleic acid-binding, OB-fold-like protein	71.66	4e-177
	2	UN025472	2.08703	0.638838	-1.69691	0.0084495	-1.77509	1	-0.407911	1		---	---	---	---	---
	2	UN020270	1.81422	0.0491542	-0.742199	1	-1.11225	1	0.217361	1		AT1G75170.1	---	Sec14p-like phosphatidylinositol transfer family protein	68.26	2e-149
	2	UN031105	1.36796	0.0171253	-0.537007	1	-1.07686	0.865218	-0.241482	1		AT4G02370.1	---	Protein of unknown function, DUF538	63.33	4e-57
	2	UN007047	2.20668	0.0177756	-2.25787	0.026762	-0.642176	1	-0.766649	1		---	---	---	---	---
	2	UN013385	5.02824	0.0269896	-3.27033	1	-0.756249	1	-0.444962	1		AT5G07800.1	---	Flavin-binding monooxygenase family protein	71.81	0
	2	UN031069	1.51756	0.0102666	-0.933571	1	-0.544667	1	---	---		AT3G23240.1	ERF1, ATERF1	ethylene response factor 1	57.07	2e-48
	2	UN034824	5.01457	0.0285923	-1.8072	1	-1.62999	1	-0.697802	0.964421		AT3G17668.1	ENA	DnaJ/Hsp40 cysteine-rich domain superfamily protein	59.8	4e-42
	2	UN004494	1.36534	0.0653118	-2.50818	8.12023e-05	-0.244555	1	-0.139925	1		ATMG00480.1	ORFB, ATP8	Plant mitochondrial ATPase, F0 complex, subunit 8 protein	82.8	2e-86
	2	UN005628	2.42173	0.390873	-5.7849	0.00465003	-0.528482	1	0.469167	1		AT2G29990.1	NDA2	alternative NAD(P)H dehydrogenase 2	73.73	0
	2	UN004830	3.50079	1	-6.39445	1.95971e-05	-1.80107	1	-0.393722	1		AT1G60500.1	DRP4C	Dynamin related protein 4C	58.44	0
	2	UN011863	1.90376	1	-5.22785	0.0424534	-1.28646	1	-0.420293	1		AT1G18850.1	---	unknown protein; FUNCTIONS IN: molecular_function unknown; INVOLVED IN: biological_process unknown; LOCATED IN: nucleolus; EXPRESSED IN: 22 plant structures; EXPRESSED DURING: 13 growth stages; Has 40 Blast hits to 40 proteins in 13 species: Archae - 0; Bacteria - 0; Metazoa - 0; Fungi - 0; Plants - 40; Viruses - 0; Other Eukaryotes - 0 (source: NCBI BLink).	48.2	4e-54
	2	UN017623	1.55195	0.109329	-2.29991	0.0205056	-1.00092	1	0.0500699	1		ATMG00520.1	MATR	Intron maturase, type II family protein	90.53	1e-119
	2	UN018441	5.13916	0.0197989	-4.36986	0.79712	---	---	0.413824	1		AT5G09380.1	---	RNA polymerase III RPC4	45.61	5e-69
	2	UN023604	5.7057	3.54314e-06	-4.27919	1	1.1974	1	0.501531	1		AT3G01680.1	---	CONTAINS InterPro DOMAIN/s: Mediator complex subunit Med28 (InterPro:IPR021640); BEST Arabidopsis thaliana protein match is: unknown protein (TAIR:AT3G01670.1); Has 122 Blast hits to 112 proteins in 13 species: Archae - 0; Bacteria - 0; Metazoa - 0; Fungi - 0; Plants - 122; Viruses - 0; Other Eukaryotes - 0 (source: NCBI BLink).	32.78	5e-45
	2	UN040454	5.41466	0.00551684	-5.1354	0.0977839	-0.850403	1	2.1769	1		---	---	---	---	---
	2	UN006149	1.1215	0.571936	-2.00373	0.00528655	-1.24831	1	-1.11448	0.871918		AT2G44065.1	---	Ribosomal protein L2 family	60.96	1e-56
	2	UN005896	1.27545	0.199747	-2.55573	1.49984e-06	-2.49577	0.00207819	-2.31759	0.102938		---	---	---	---	---
	2	UN006698	1.32282	0.339631	-1.59716	0.393312	-2.42692	0.0129208	-0.617313	1		ATMG01190.1	ATP1	ATP synthase subunit 1	91.29	0
	2	UN006987	0.567775	1	-0.554958	1	-1.87178	0.027036	-0.329653	1		AT5G23190.1	CYP86B1	cytochrome P450, family 86, subfamily B, polypeptide 1	69.88	0
	2	UN009597	1.38746	0.0918149	-1.17547	1	-3.38247	0.00808925	-0.375302	1		AT5G23960.1	ATTPS21, TPS21	terpene synthase 21	38.21	4e-124
	2	UN014149	1.70736	0.0280278	-0.733032	1	-3.98788	0.000463843	-0.831103	1		AT1G24430.1	---	HXXXD-type acyl-transferase family protein	35.81	1e-81
	2	UN015912	1.21489	0.0157133	-0.749242	1	-3.02555	0.217169	-0.699867	1		---	---	---	---	---
	2	UN024930	0.892949	0.524683	-0.548917	1	-2.00948	0.0347392	-0.697797	1		AT4G36830.1	HOS3-1	GNS1/SUR4 membrane protein family	66.79	6e-108
	2	UN030129	1.41576	0.0322546	-0.808975	1	-3.19888	0.60328	-1.01827	1		AT1G24020.1	MLP423	MLP-like protein 423	49.66	2e-42
	2	UN003147	1.19742	1	-5.26651	0.0344758	-2.63011	1	-0.529341	1		AT5G01110.1	---	Tetratricopeptide repeat (TPR)-like superfamily protein	31.35	2e-108
	2	UN004163	0.629313	0.676633	-2.63922	0.0130149	-1.74294	0.0817699	0.0589728	1		ATMG01360.1	COX1	cytochrome oxidase	99.24	0
	2	UN005036	1.15317	0.41236	-1.64602	0.0446733	-1.59127	0.493906	-0.554551	1		ATMG00220.1	COB	apocytochrome b	95.67	0
	2	UN006263	0.761167	0.942244	-2.11785	0.000379858	-1.50136	0.126946	-0.616327	1		---	---	---	---	---
	2	UN027341	1.27355	1	-2.7141	0.0453961	-2.04378	1	-0.698571	1		ATCG00280.1	PSBC	photosystem II reaction center protein C	73.42	3e-29
	2	UN003661	1.02575	0.149592	-2.10539	0.000113488	-1.93048	0.326937	-0.0743439	1		ATMG00520.1	MATR	Intron maturase, type II family protein	91.35	0
	2	UN034918	1.31623	0.384003	-2.81021	1.2104e-05	-2.24055	0.22797	-0.18553	1		AT5G09600.1	SDH3-1	succinate dehydrogenase 3-1	38.6	3e-07
	2	UN002804	0.751577	1	-0.869001	0.51156	-1.29987	0.0132104	0.10462	1		AT2G25490.1	EBF1, FBL6	EIN3-binding F box protein 1	56.14	0
	2	UN003392	0.752442	0.590529	-1.97022	0.00535599	-2.52455	0.0619426	0.484603	1		ATMG01275.1	NAD1A, NAD1, ND1	NADH dehydrogenase 1A	91.33	7e-123
	2	UN003865	0.663747	1	-1.59326	0.0466371	-2.3885	0.572778	0.041459	1		ATMG00290.1	RPS4	mitochondrial ribosomal protein S4	79.37	8e-103
	2	UN029776	1.03125	1	-2.69977	0.0348667	-3.22844	0.919856	0.0580089	1		AT3G03600.1	RPS2	ribosomal protein S2	58.18	4e-45
	2	UN019098	1.79959	0.313259	-2.56822	0.0167773	-2.20511	0.914856	0.936213	0.230697		AT2G07599.2	---	unknown protein; BEST Arabidopsis thaliana protein match is: unknown protein (TAIR:ATMG01040.1).	91.82	5e-66
	2	UN028477	---	---	-5.46228	0.0165833	-5.69312	0.0117215	2.9125	1		AT2G29960.1	CYP5, ATCYP5, CYP19-4	cyclophilin 5	87.78	2e-107
	2	UN046961	1.69581	1.00836e-07	-2.46803	3.76752e-06	-2.54653	0.00558411	---	---		---	---	---	---	---
	2	UN053398	1.64939	3.49674e-06	-2.32254	6.03804e-05	-2.25918	0.0334478	0.301429	1		---	---	---	---	---
	2	UN003914	0.448136	1	0.504279	1	-1.73205	0.00102888	-0.0708283	1		AT1G77760.1	NIA1, GNR1, NR1	nitrate reductase 1	74.37	0
	2	UN004159	0.50094	1	0.646903	1	-1.71178	0.00207819	-0.0939597	1		AT1G65730.1	YSL7	YELLOW STRIPE like 7	72.31	0
	2	UN008953	0.96721	1	1.51073	1	-3.28898	0.0469445	-0.517071	1		AT3G04580.1	EIN4	Signal transduction histidine kinase, hybrid-type, ethylene sensor	44.71	3e-126
	2	UN025558	0.43784	0.866921	0.865446	1	-1.25182	0.012549	---	---		AT3G53260.1	PAL2, ATPAL2	phenylalanine ammonia-lyase 2	82.8	0
	2	UN004165	0.589658	1	1.1545	1	-5.56817	0.0177557	0.105883	1		AT1G69420.2	---	DHHC-type zinc finger family protein	61	0
	2	UN008795	0.347144	1	0.354992	1	-1.7871	9.4945e-05	0.121081	1		AT1G22410.1	---	Class-II DAHP synthetase family protein	89.19	0
	2	UN025229	-0.0678834	1	0.630099	1	-1.27283	0.0439263	0.084369	1		AT2G36320.1	---	A20/AN1-like zinc finger family protein	64.06	1e-22
	2	UN028007	0.0291499	1	0.916994	1	-2.42223	0.0334478	0.399433	1		AT3G60520.1	---	unknown protein; BEST Arabidopsis thaliana protein match is: unknown protein (TAIR:AT1G02070.1); Has 107 Blast hits to 107 proteins in 14 species: Archae - 0; Bacteria - 0; Metazoa - 0; Fungi - 0; Plants - 107; Viruses - 0; Other Eukaryotes - 0 (source: NCBI BLink).	45.38	2e-29
	2	UN032734	0.0949077	1	0.533926	1	-1.70582	0.0365519	0.3018	1		AT3G28917.1	MIF2	mini zinc finger 2	68.57	4e-30
	2	UN033533	0.0142569	1	0.923589	1	-2.22956	4.40974e-07	0.683967	1		AT5G13930.1	CHS, TT4, ATCHS	Chalcone and stilbene synthase family protein	87.35	4e-101
	2	UN021396	1.01583	0.0232537	0.628938	1	-0.727129	0.816502	0.372191	1		AT5G49230.1	HRB1	Drought-responsive family protein	31.16	2e-27
	2	UN004785	1.93324	0.00190697	0.855255	1	-1.43382	1	0.994027	1		AT1G32640.1	ATMYC2, RD22BP1, JAI1, JIN1, MYC2, ZBF1	Basic helix-loop-helix (bHLH) DNA-binding family protein	53.93	9e-48
	2	UN012520	1.22742	0.029043	0.778257	1	-1.11907	0.0939433	0.755411	1		AT1G02850.4	BGLU11	beta glucosidase 11	54.95	0
	2	UN028600	1.80084	0.000959585	0.986866	1	-1.63337	0.578519	0.923523	0.81101		AT1G67750.1	---	Pectate lyase family protein	79.85	3e-160
	2	UN004558	1.36332	0.000573385	0.571015	1	-1.30987	0.037997	0.279406	1		AT5G45380.1	ATDUR3, DUR3	solute:sodium symporters;urea transmembrane transporters	79.71	0
	2	UN016117	1.90677	0.0179258	0.829879	1	-1.3774	0.252975	0.418241	1		AT1G13700.1	PGL1	6-phosphogluconolactonase 1	66.67	3e-115
	2	UN010969	1.58073	0.00171873	1.00516	1	-1.07794	0.154685	0.209705	1		AT1G34040.1	---	Pyridoxal phosphate (PLP)-dependent transferases superfamily protein	52.63	1e-149
	2	UN020853	1.2147	0.000599135	0.816923	1	-0.827652	1	0.291808	1		AT1G47128.1	RD21, RD21A	Granulin repeat cysteine protease family protein	74.27	4e-98
	2	UN029845	2.52045	3.40055e-09	1.52245	0.662971	-2.05719	0.106538	0.240274	1		AT4G39720.1	---	VQ motif-containing protein	65	2e-12
	2	UN013235	1.05007	0.0370047	0.890186	1	-1.13375	0.237976	0.366743	1		AT2G03530.1	UPS2, ATUPS2	ureide permease 2	74.82	9e-177
	2	UN023483	1.59157	0.0125911	1.52709	0.926152	-1.69483	0.404577	0.747397	1		AT1G46264.1	AT-HSFB4, HSFB4, SCZ	heat shock transcription factor B4	36	6e-41
	2	UN034616	1.83409	0.0303531	1.6514	0.702779	-1.79143	0.978673	---	---		AT3G27400.1	---	Pectin lyase-like superfamily protein	80.57	2e-119
	2	UN015288	0.887695	0.0346924	0.410474	1	-1.13868	0.0768144	0.79929	1		AT1G15950.1	CCR1, IRX4, ATCCR1	cinnamoyl coa reductase 1	77.09	1e-176
	2	UN030466	1.48336	0.0020423	0.850343	1	-1.5576	0.556333	1.43076	1		AT5G20100.1	---	unknown protein; BEST Arabidopsis thaliana protein match is: unknown protein (TAIR:AT1G80180.1); Has 82 Blast hits to 82 proteins in 12 species: Archae - 0; Bacteria - 0; Metazoa - 0; Fungi - 0; Plants - 82; Viruses - 0; Other Eukaryotes - 0 (source: NCBI BLink).	41.49	2e-15
	2	UN030668	1.27247	0.00521679	0.152749	1	-1.08012	0.211061	1.36221	1		AT2G17705.1	---	unknown protein; FUNCTIONS IN: molecular_function unknown; INVOLVED IN: biological_process unknown; LOCATED IN: plasma membrane; EXPRESSED IN: cultured cell; BEST Arabidopsis thaliana protein match is: unknown protein (TAIR:AT4G08330.1); Has 135 Blast hits to 135 proteins in 32 species: Archae - 5; Bacteria - 29; Metazoa - 0; Fungi - 0; Plants - 91; Viruses - 0; Other Eukaryotes - 10 (source: NCB…	70.4	9e-54
	2	UN004758	1.00017	0.0353023	0.481383	1	-1.65088	0.000620064	0.34065	1		AT1G47128.1	RD21, RD21A	Granulin repeat cysteine protease family protein	71.9	0
	2	UN009196	0.710709	0.12195	0.494507	1	-1.23194	0.0224725	0.354072	1		AT1G51680.1	4CL1, 4CL.1, AT4CL1	4-coumarate:CoA ligase 1	71.9	0
	2	UN006824	0.506175	1	0.701226	1	-1.39099	0.029068	0.581535	1		AT1G31690.1	---	Copper amine oxidase family protein	54.6	0
	2	UN023193	0.377824	1	0.455633	1	-1.31782	0.0451238	0.573622	1		AT2G04520.1	---	Nucleic acid-binding, OB-fold-like protein	93.81	3e-64
	2	UN015149	0.710135	1	0.389594	1	-1.86964	0.00139185	0.682488	1		AT3G57990.1	---	unknown protein; Has 1497 Blast hits to 1323 proteins in 52 species: Archae - 0; Bacteria - 4; Metazoa - 23; Fungi - 34; Plants - 61; Viruses - 0; Other Eukaryotes - 1375 (source: NCBI BLink).	53.42	2e-96
	2	UN002648	0.74483	0.866035	0.319731	1	-2.5172	0.014764	0.716159	1		AT3G13620.1	---	Amino acid permease family protein	61.27	0
	2	UN026377	0.462964	1	0.103279	1	-1.74549	0.000696386	0.552823	1		AT3G12630.1	---	A20/AN1-like zinc finger family protein	59.18	1e-06
	2	UN027963	0.667974	0.522636	0.361324	1	-2.29217	0.0181138	0.399433	1		AT4G11650.1	ATOSM34, OSM34	osmotin 34	71.71	1e-103
	2	UN009424	1.13263	0.00877762	0.286422	1	-1.16963	0.14998	0.581583	1		AT5G42650.1	AOS, CYP74A, DDE2	allene oxide synthase	67.02	0
	2	UN015158	1.02227	0.0307229	0.159614	1	-1.07319	1	0.281434	1		AT5G05600.1	---	2-oxoglutarate (2OG) and Fe(II)-dependent oxygenase superfamily protein	67.72	4e-150
	2	UN017982	1.36841	0.0126449	-0.00751422	1	-1.63713	0.312124	0.609491	1		AT5G05320.1	---	FAD/NAD(P)-binding oxidoreductase family protein	51.62	3e-112
	2	UN034348	2.06692	0.0342335	-0.0799867	1	-2.63578	0.0999753	0.497251	1		AT1G24020.1	MLP423	MLP-like protein 423	38	1e-38
	2	UN001297	0.633601	0.576361	0.0123772	1	-1.1572	0.0402394	0.478065	1		AT1G32640.1	ATMYC2, RD22BP1, JAI1, JIN1, MYC2, ZBF1	Basic helix-loop-helix (bHLH) DNA-binding family protein	56.38	5e-80
	2	UN010847	1.0502	0.24555	0.0789799	1	-1.75899	0.0177826	0.600358	1		AT3G50140.1	---	Plant protein of unknown function (DUF247)	32.31	4e-64
	2	UN030004	1.06452	0.0148025	0.188669	1	-1.8602	0.001134	1.06396	1		AT3G12630.1	---	A20/AN1-like zinc finger family protein	54.88	6e-49
	2	UN014148	1.62169	0.0314429	-0.37682	1	-2.59504	0.0361296	1.28033	0.269581		AT1G24430.1	---	HXXXD-type acyl-transferase family protein	36.77	2e-90
	2	UN037223	2.94508	1	-0.817664	1	-4.17856	1	1.25811	0.0358657		AT5G14070.1	ROXY2	Thioredoxin superfamily protein	61.76	6e-08
	2	UN034225	1.2792	0.0602638	2.0871	0.0130241	-0.556475	1	---	---		AT3G56500.1	---	serine-rich protein-related	64.29	8e-12
	2	UN001475	1.28484	0.000126049	1.09997	0.119579	-0.473629	0.883143	1.36877	0.131837		AT4G35300.1	TMT2	tonoplast monosaccharide transporter2	73.11	0
	2	UN018558	1.15105	0.0125911	0.945359	1	-0.599518	1	1.26703	1		AT5G19855.1	---	Chaperonin-like RbcX protein	57.35	1e-73
	2	UN025757	1.27519	1	1.14623	1	-0.42094	1	1.191	0.036571		AT2G31600.1	---	unknown protein; FUNCTIONS IN: molecular_function unknown; INVOLVED IN: biological_process unknown; LOCATED IN: chloroplast; BEST Arabidopsis thaliana protein match is: unknown protein (TAIR:AT3G53860.1); Has 35333 Blast hits to 34131 proteins in 2444 species: Archae - 798; Bacteria - 22429; Metazoa - 974; Fungi - 991; Plants - 531; Viruses - 0; Other Eukaryotes - 9610 (source: NCBI BLink).	46.35	6e-60
	2	UN010148	1.20452	0.00700994	1.10959	0.559445	-0.657568	1	2.41881	1		AT1G32170.1	XTR4, XTH30	xyloglucan endotransglucosylase/hydrolase 30	68.17	2e-157
	2	UN010832	1.25528	0.245125	1.46987	0.105292	-0.808973	0.832808	2.02481	6.46251e-05		AT1G22170.1	---	Phosphoglycerate mutase family protein	78.35	5e-174
	2	UN023791	0.744756	0.091929	1.44962	0.00347429	-0.693775	1	2.00123	1		AT4G01470.1	GAMMA-TIP3, TIP1;3, ATTIP1.3	tonoplast intrinsic protein 1;3	79.84	6e-125
	2	UN067757	0.727917	1	---	---	-1.3316	1	1.72382	0.00879047		---	---	---	---	---
	2	UN031495	0.162214	1	0.280105	1	-2.01132	0.0124903	---	---		AT2G44310.1	---	Calcium-binding EF-hand family protein	70.92	4e-69
	2	UN086482	0.44022	1	0.125097	1	-2.20814	0.000266902	---	---		AT3G52590.1	UBQ1, EMB2167, ERD16, HAP4	ubiquitin extension protein 1	100	4e-25
	2	UN022641	-0.0764438	1	-0.5566	1	-3.08458	0.0132982	0.438448	1		AT1G80450.1	---	VQ motif-containing protein	33.13	5e-13
	2	UN034278	-0.145183	1	-0.506011	1	-2.395	0.0181138	0.399433	1		AT5G54530.1	---	Protein of unknown function, DUF538	60.45	2e-50
	2	UN023142	1.70697	0.0747261	-0.506211	1	-2.84389	0.0259203	3.39422	0.00173698		AT3G07090.1	---	PPPDE putative thiol peptidase family protein	50.75	4e-12
	2	UN006854	0.421595	0.841772	0.240318	1	-1.34144	0.0473941	1.02327	1		AT3G54700.1	PHT1;7	phosphate transporter 1;7	76.36	2e-19
	2	UN024856	0.617585	1	0.308552	1	-1.67564	0.0478848	1.10551	1		AT2G44745.1	---	WRKY family transcription factor	53.88	2e-55
	2	UN024890	0.557447	0.469269	0.0843098	1	-1.99711	0.0181138	1.26899	1		AT1G52760.1	LysoPL2	lysophospholipase 2	75.24	0
	2	UN007958	0.340735	1	-0.107134	1	-1.24502	0.033605	0.650089	1		AT1G20510.1	OPCL1	OPC-8:0 CoA ligase1	73.51	0
	2	UN028619	2.19513	0.162501	-0.456371	1	-4.86421	8.32553e-05	2.45136	1		AT4G33040.1	---	Thioredoxin superfamily protein	65.25	3e-43
	2	UN030009	0.630853	1	-0.106886	1	-1.49744	0.0236164	---	---		AT1G15100.1	RHA2A	RING-H2 finger A2A	52.22	4e-27
	2	UN015685	0.0473763	1	-0.242052	1	-1.3743	0.0129479	0.829085	1		AT4G13940.1	HOG1, EMB1395, SAHH1, MEE58, ATSAHH1	S-adenosyl-L-homocysteine hydrolase	89.44	0
	2	UN019893	0.150197	1	-1.19697	1	-3.99269	0.864803	2.80503	0.0221997		---	---	---	---	---
	2	UN013923	0.438382	1	-0.0988923	1	-2.658	1.54105e-06	2.28967	1		AT1G11360.1	---	Adenine nucleotide alpha hydrolases-like superfamily protein	68.54	5e-58
	2	UN020478	0.323854	1	-0.212108	1	-1.88193	0.00861616	1.54249	0.662861		AT5G11770.1	---	NADH-ubiquinone oxidoreductase 20 kDa subunit, mitochondrial	94.3	1e-101
	2	UN033225	-0.473669	0.884372	-0.345124	1	-1.5821	0.0107571	1.51281	1		AT1G70600.1	---	Ribosomal protein L18e/L15 superfamily protein	85.62	3e-79
	2	UN010143	-0.157144	1	-0.12775	1	-1.2675	0.0303202	0.925197	1		AT4G31550.1	WRKY11, ATWRKY11	WRKY DNA-binding protein 11	54.26	1e-97
	2	UN033386	-0.222976	1	-0.527987	1	-2.4639	0.0188471	2.2417	1		AT1G15100.1	RHA2A	RING-H2 finger A2A	58.57	2e-25
	2	UN000193	0.0701502	1	-2.0446	0.000232583	-2.98565	0.252975	2.38565	0.00122719		ATCG00020.1	PSBA	photosystem II reaction center protein A	99.15	0
	2	UN000921	0.762693	0.632075	-2.3018	0.620749	-2.74396	0.073374	2.28609	0.000855507		ATMG00070.1	NAD9	NADH dehydrogenase subunit 9	94.74	3e-134
	2	UN000049	0.844895	0.241364	-1.31967	0.0280049	-3.13899	0.0029001	2.10143	0.00115627		ATCG01280.1	YCF2.2	Chloroplast Ycf2;ATPase, AAA type, core	90.05	0
	2	UN000013	0.607678	0.683958	-1.6035	0.000112641	-3.57739	0.000169206	2.31376	0.000131411		ATCG00490.1	RBCL	ribulose-bisphosphate carboxylases	94.71	0
	2	UN000153	0.706174	0.498819	-1.81455	0.000140255	-3.2423	0.0318942	2.37887	0.00086024		ATCG01010.1	NDHF	NADH-Ubiquinone oxidoreductase (complex I), chain 5 protein	75.87	0
	2	UN000509	0.534847	1	-1.87606	6.81883e-06	-3.67526	0.00602904	2.66545	0.00776065		ATCG00580.1	PSBE	photosystem II reaction center protein E	97.59	2e-54
	2	UN020502	0.641162	1	-0.711154	1	-1.93258	0.0398509	1.71068	1		AT3G25290.1	---	Auxin-responsive family protein	44.05	6e-41
	2	UN000275	0.57289	0.52425	-1.82503	0.797492	-3.58073	0.0228918	1.69989	0.0722924		ATCG01280.1	YCF2.2	Chloroplast Ycf2;ATPase, AAA type, core	84.21	0
	2	UN000007	0.561436	0.447022	-1.4602	0.325753	-3.57225	0.000100806	1.86562	0.00826424		ATCG00680.1	PSBB	photosystem II reaction center protein B	96.65	0
	2	UN000006	0.41086	1	-1.23931	0.300022	-3.37234	0.000836943	1.83426	0.113731		ATCG01130.1	YCF1.2	Ycf1 protein	45.25	0
	2	UN000001	0.545109	0.757016	-1.14907	0.535462	-3.52354	0.000503365	1.76733	0.0182263		ATCG00170.1	RPOC2	DNA-directed RNA polymerase family protein	77.61	0
	2	UN000322	0.58647	0.460999	-1.40301	0.0546786	-3.95189	0.000712495	1.97552	0.00206282		ATCG00280.1	PSBC	photosystem II reaction center protein C	97.88	0
	2	UN000008	0.262894	1	-1.66427	0.00352846	-4.04352	0.00237114	1.9933	0.00222671		ATCG00350.1	PSAA	Photosystem I, PsaA/PsaB protein	97.2	0
	2	UN029567	0.23197	1	-1.00351	1	-2.22154	0.0271764	1.10016	1		AT5G19140.1	ATAILP1, AILP1	Aluminium induced protein with YGL and LRDR motifs	65.33	2e-113
	2	UN035029	0.178051	1	-1.21386	1	-2.84766	0.0023596	1.02845	1		AT1G71695.1	---	Peroxidase superfamily protein	66.38	1e-112
	2	UN006359	0.923816	0.135431	-0.143586	1	-3.12595	0.00314277	-0.0698799	1		AT4G13510.1	AMT1;1, ATAMT1, ATAMT1;1	ammonium transporter 1;1	79.79	0
	2	UN019603	1.33302	0.00141114	-0.512891	1	-4.23454	6.84249e-10	-0.273096	1		AT4G27030.1	FAD4, FADA	fatty acid desaturase A	54.39	3e-82
	2	UN004041	0.49965	1	-0.37564	1	-2.80251	0.000948116	0.26551	1		ATCG01310.1	RPL2.2	ribosomal protein L2	89.71	0
	2	UN018770	0.218517	1	-0.291743	1	-1.37075	0.016718	0.116819	1		AT1G13280.1	AOC4	allene oxide cyclase 4	72.07	3e-83
	2	UN021771	0.529917	1	-1.08436	1	-4.27163	5.02911e-05	-0.0397866	1		AT4G17030.1	ATEXLB1, EXPR, AT-EXPR, ATEXPR1, ATHEXP BETA 3.1, EXLB1	expansin-like B1	43.81	3e-60
	2	UN011736	0.153585	1	-0.339083	1	-1.81071	0.00908313	-0.22237	1		AT4G30960.1	CIPK6, SIP3, SNRK3.14, ATCIPK6	SOS3-interacting protein 3	75.18	0
	2	UN034346	0.279353	1	-0.644612	1	-4.05989	0.0182825	-0.292816	1		AT5G59320.1	LTP3	lipid transfer protein 3	57.45	9e-35
	2	UN011424	1.19187	0.0190257	-0.804165	1	-2.67099	0.0788203	0.652708	1		AT5G23960.1	ATTPS21, TPS21	terpene synthase 21	39.27	3e-134
	2	UN026963	1.04226	0.274395	-1.1303	1	-3.23054	0.000107276	0.481884	1		AT4G33360.1	FLDH	NAD(P)-binding Rossmann-fold superfamily protein	72.39	2e-176
	2	UN033960	0.687156	0.993575	-0.720609	1	-2.77259	0.0304654	0.373666	1		AT1G71695.1	---	Peroxidase superfamily protein	62.98	3e-73
	2	UN029754	1.45709	2.2228e-05	-0.291063	1	-2.78991	0.000525905	0.399433	1		AT1G24020.1	MLP423	MLP-like protein 423	40.94	6e-39
	2	UN030682	1.96776	3.79647e-10	-0.593767	1	-3.43445	0.00102888	0.372651	1		AT1G56580.1	SVB	Protein of unknown function, DUF538	46.72	1e-43
	2	UN046721	1.53689	0.135839	-0.800367	1	-3.72954	0.0181138	0.296589	1		AT1G24020.1	MLP423	MLP-like protein 423	39.17	7e-27
	2	UN010256	0.32993	1	-0.285091	1	-1.85028	0.0078809	0.700014	1		AT3G60630.1	HAM2, ATHAM2, LOM2	GRAS family transcription factor	43.88	6e-16
	2	UN004889	0.0964289	1	-0.336995	1	-1.38255	0.00628539	0.388765	1		AT5G13420.1	---	Aldolase-type TIM barrel family protein	79	0
	2	UN011128	0.312711	1	-0.504726	1	-2.54639	0.000801703	0.777521	1		AT4G34200.1	EDA9	D-3-phosphoglycerate dehydrogenase	82.1	0
	2	UN027312	0.327458	1	-0.385418	1	-2.19522	0.0301899	0.44349	1		AT1G65520.1	ATECI1, ECI1, ECHIC, PEC11	delta(3), delta(2)-enoyl CoA isomerase 1	54.93	3e-77
	2	UN006761	0.0744366	1	-0.190829	1	-2.1877	0.00990504	0.931299	0.366367		AT1G08250.1	ADT6	arogenate dehydratase 6	44.52	7e-73
	2	UN012951	-0.177277	1	-0.239541	1	-1.85985	0.00554511	0.818531	1		AT1G09070.1	SRC2, (AT)SRC2	soybean gene regulated by cold-2	43.53	2e-33
	2	UN019533	-0.229186	1	-0.17228	1	-1.81241	0.000107276	0.736781	1		AT1G17730.1	VPS46.1, CHMP1B	vacuolar protein sorting 46.1	87.25	4e-117
	2	UN016832	-0.408625	1	-0.0220246	1	-2.86173	0.00816577	1.13759	1		AT2G46630.1	---	unknown protein; LOCATED IN: chloroplast; EXPRESSED IN: 22 plant structures; EXPRESSED DURING: 13 growth stages; Has 110095 Blast hits to 59224 proteins in 2216 species: Archae - 177; Bacteria - 15429; Metazoa - 38345; Fungi - 18843; Plants - 13341; Viruses - 3084; Other Eukaryotes - 20876 (source: NCBI BLink).	39.26	1e-09
	2	UN026428	-0.156246	1	-0.00508981	1	-1.64951	0.000500821	0.603362	1		AT5G04800.1	---	Ribosomal S17 family protein	88.68	3e-66
	2	UN019668	-0.348383	1	-0.158475	1	-2.07138	0.0017671	0.542582	1		---	---	---	---	---
	2	UN039533	-1.08945	0.0761192	-0.493111	1	-6.91852	1.86403e-06	---	---		---	---	---	---	---
	2	UN011296	0.122371	1	0.189271	1	-1.33418	0.0184943	0.349826	1		AT5G42090.1	---	Lung seven transmembrane receptor family protein	78.22	0
	2	UN012587	0.0867348	1	0.287169	1	-1.57402	0.0313061	0.519211	1		AT4G24240.1	WRKY7, ATWRKY7	WRKY DNA-binding protein 7	48.53	5e-69
	2	UN027335	-0.0505007	1	0.112391	1	-1.38279	0.00663034	0.415446	1		AT2G40060.1	---	Clathrin light chain protein	68.02	5e-62
	2	UN026378	0.0497633	1	-0.0119759	1	-1.54973	0.0268609	0.323435	1		AT5G48930.1	HCT	hydroxycinnamoyl-CoA shikimate/quinate hydroxycinnamoyl transferase	74.09	3e-117
	2	UN031084	0.0297384	1	-0.0405297	1	-1.75406	0.0422791	0.301017	1		AT2G09990.1	---	Ribosomal protein S5 domain 2-like superfamily protein	90.07	5e-94
	2	UN083934	0.757246	1	-0.170545	1	-6.81976	1.01202e-06	1.83653	1		AT4G05050.1	UBQ11	ubiquitin 11	100	5e-46
	2	UN030782	0.169048	1	-1.87365	0.00576479	-2.51529	0.145892	---	---		ATCG00050.1	RPS16	ribosomal protein S16	74.63	3e-31
	2	UN009272	-0.125815	1	-0.194797	1	-0.963203	0.886386	2.01137	8.2419e-06		AT3G62630.1	---	Protein of unknown function (DUF1645)	56.15	3e-82
	2	UN032761	-0.887664	0.662958	-0.953117	1	-5.796	0.00100206	---	---		AT2G15780.1	---	Cupredoxin superfamily protein	52.17	5e-39
	2	UN021854	-0.47232	1	-0.300763	1	-2.11711	0.0191659	---	---		AT3G57560.1	NAGK	N-acetyl-l-glutamate kinase	78.14	4e-144
	2	UN061471	-0.0909128	1	---	---	-0.407714	1	1.40367	0.0224005		AT1G56140.1	---	Leucine-rich repeat transmembrane protein kinase	55.93	2e-39
	2	UN023112	0.0754506	1	-0.442826	1	-1.39035	1	1.88576	0.0105551		AT1G77370.1	---	Glutaredoxin family protein	68.57	1e-47
	2	UN032808	0.0489096	1	-0.437934	1	-1.23005	0.253586	2.01986	0.00122125		AT3G55310.1	---	NAD(P)-binding Rossmann-fold superfamily protein	64.52	2e-20
	2	UN069511	-0.395093	1	-0.587739	1	-1.29721	0.0202538	2.19854	1		AT3G52590.1	UBQ1, EMB2167, ERD16, HAP4	ubiquitin extension protein 1	100	2e-50
	2	UN069696	-0.167354	1	-0.603904	1	-1.55065	0.00642257	2.42788	1		AT3G52590.1	UBQ1, EMB2167, ERD16, HAP4	ubiquitin extension protein 1	100	2e-49
	2	UN031781	-0.217817	1	-0.136528	1	-1.92718	0.00146598	---	---		AT4G15800.1	RALFL33	ralf-like 33	73.49	2e-40
	2	UN086224	-0.3426	1	-0.366166	1	-3.56751	0.000436824	---	---		AT4G05050.1	UBQ11	ubiquitin 11	100	3e-43
	2	UN006552	-0.607427	0.424403	0.422089	1	-2.10781	9.88203e-05	0.861663	1		AT1G61720.1	BAN	NAD(P)-binding Rossmann-fold superfamily protein	60.96	6e-150
	2	UN023261	-1.13844	0.00510635	0.372544	1	-2.29963	4.55347e-07	1.28327	1		AT5G13930.1	CHS, TT4, ATCHS	Chalcone and stilbene synthase family protein	90.15	0
	2	UN011661	-0.0343287	1	0.554026	1	-0.734688	1	1.14919	0.0398642		AT2G44660.1	---	ALG6, ALG8 glycosyltransferase family	70.63	0
	2	UN022783	0.209815	1	0.624812	1	-1.7136	0.798143	1.40151	0.0150365		AT4G15248.1	---	B-box type zinc finger family protein	47.14	2e-16
	2	UN010031	-0.0909128	1	---	---	-2.68511	1	1.67675	0.00055609		AT3G14460.1	---	LRR and NB-ARC domains-containing disease resistance protein	39.25	5e-39
	2	UN023506	-0.114913	1	0.862379	1	-1.2808	0.0142688	---	---		AT5G05270.1	---	Chalcone-flavanone isomerase family protein	69.54	2e-74
	2	UN015320	0.323526	1	0.415426	1	-0.855117	0.728273	1.50402	0.0213409		AT3G49680.1	ATBCAT-3, BCAT3	branched-chain aminotransferase 3	68.79	1e-168
	2	UN016895	0.448443	0.934552	0.297717	1	-0.753379	0.556731	1.73973	0.000684572		AT2G36320.1	---	A20/AN1-like zinc finger family protein	51.55	2e-45
	2	UN029337	0.299243	1	0.15256	1	-1.22456	0.040377	1.55713	1		AT5G17190.1	---	FUNCTIONS IN: molecular_function unknown; INVOLVED IN: intracellular protein transport; LOCATED IN: endomembrane system, integral to membrane, endoplasmic reticulum; EXPRESSED IN: 23 plant structures; EXPRESSED DURING: 13 growth stages; CONTAINS InterPro DOMAIN/s: B-cell receptor-associated 31-like (InterPro:IPR008417); BEST Arabidopsis thaliana protein match is: unknown protein (TAIR:AT3G03160.1…	81.54	5e-72
	2	UN031561	0.56575	1	0.00751798	1	-1.98849	0.00341993	2.72324	1		AT1G13360.1	---	unknown protein; BEST Arabidopsis thaliana protein match is: unknown protein (TAIR:AT3G25870.1); Has 69 Blast hits to 69 proteins in 16 species: Archae - 0; Bacteria - 0; Metazoa - 6; Fungi - 0; Plants - 63; Viruses - 0; Other Eukaryotes - 0 (source: NCBI BLink).	42.69	4e-28
	2	UN014602	0.0286336	1	0.195303	1	-1.29116	1	1.78111	0.012285		AT5G65380.1	---	MATE efflux family protein	63.92	0
	2	UN011572	-0.11834	1	-0.0258281	1	-1.36426	0.0147737	1.94147	0.00033863		AT1G64660.1	ATMGL, MGL	methionine gamma-lyase	77	0
	2	UN041482	-0.346705	1	0.101185	1	-2.03335	1	2.68523	4.06394e-05		AT3G18830.1	ATPLT5, PMT5, ATPMT5	polyol/monosaccharide transporter 5	59.38	1e-51
	2	UN020702	-0.757585	1	0.58816	1	-0.951519	1	2.13973	0.0368591		AT2G19130.1	---	S-locus lectin protein kinase family protein	53.2	6e-151
	2	UN013913	-0.106874	1	0.0694643	1	-0.593674	0.990179	1.631	0.0402053		AT5G65270.1	AtRABA4a, RABA4a	RAB GTPase homolog A4A	86.45	1e-136
	2	UN012043	-1.00015	0.126982	0.0321203	1	-1.44447	0.00700421	---	---		AT5G10770.1	---	Eukaryotic aspartyl protease family protein	41.87	5e-95
	2	UN028020	-1.20232	0.00539886	1.67824	0.000897032	0.564513	1	1.15747	0.373738		AT3G62550.1	---	Adenine nucleotide alpha hydrolases-like superfamily protein	50	1e-52
	2	UN036528	-0.424784	1	1.37706	0.0355374	0.13685	1	1.07177	1		AT2G26640.1	KCS11	3-ketoacyl-CoA synthase 11	85.81	3e-94
	2	UN010359	-0.52325	1	1.02326	1	-1.87823	0.0313061	-0.516969	1		AT3G52990.1	---	Pyruvate kinase family protein	71.81	0
	2	UN012930	-0.769768	0.105074	0.757656	1	-1.85367	7.51513e-06	-0.0249216	1		AT3G51240.1	F3H, TT6, F3'H	flavanone 3-hydroxylase	81.23	0
	2	UN008158	-0.957152	0.0290543	0.347737	1	-0.358973	1	-0.252424	1		AT5G01320.1	---	Thiamine pyrophosphate dependent pyruvate decarboxylase family protein	81.77	0
	2	UN037239	-0.53886	1	1.61602	0.0114118	-0.110022	1	-0.953934	1		AT2G26640.1	KCS11	3-ketoacyl-CoA synthase 11	81.3	6e-143
	2	UN029612	0.295045	1	1.62265	0.0188687	-0.0143268	1	---	---		AT3G20340.1	---	Expression of the gene is downregulated in the presence of paraquat, an inducer of photoxidative stress.	32.77	1e-15
	2	UN013064	1.00454	0.632075	1.88376	0.0146238	-0.0649969	1	-0.46728	1		AT3G50150.1	---	Plant protein of unknown function (DUF247)	32.78	3e-55
	2	UN021871	-1.66288	1	5.79272	0.00352846	-3.01836	1	-1.62601	1		AT3G61860.1	ATRSP31, RSP31, At-RS31, RS31	RNA-binding (RRM/RBD/RNP motifs) family protein	64.23	5e-105
	2	UN008002	-1.18441	1	5.38404	0.0388297	-4.01793	0.827932	-0.188126	1		AT1G19100.1	---	Histidine kinase-, DNA gyrase B-, and HSP90-like ATPase family protein	54.65	0
	2	UN027708	-0.0707401	1	1.40455	0.0146238	-0.784838	1	---	---		AT1G56580.1	SVB	Protein of unknown function, DUF538	57.93	3e-46
	2	UN015020	0.329619	1	1.61458	0.000109944	-0.451042	1	-0.111697	1		AT5G25610.1	RD22, ATRD22	BURP domain-containing protein	56.45	1e-92
	2	UN080031	2.5542	1	---	---	-5.65564	0.0135206	---	---		AT3G52590.1	UBQ1, EMB2167, ERD16, HAP4	ubiquitin extension protein 1	98.7	2e-51
	2	UN007974	1.22671	1	-5.44989	0.0188687	0.973531	1	-0.347183	1		AT4G19210.1	ATRLI2, RLI2	RNAse l inhibitor protein 2	90.23	0
	2	UN050142	-0.219361	1	-1.79912	0.0135238	-0.408631	1	0.108699	1		AT5G56010.1	HSP81-3, Hsp81.3, AtHsp90-3, AtHsp90.3	heat shock protein 81-3	93.6	2e-77
	2	UN028599	5.43872	0.00488135	-4.42661	0.512093	---	---	-0.100739	1		AT1G32540.1	LOL1	lsd one like 1	90.24	3e-63
	2	UN012538	-0.804648	0.65628	0.160445	1	-0.399867	1	1.29824	0.0285668		AT2G02800.1	APK2B	protein kinase 2B	70.09	0
	2	UN022945	-0.921184	1	-1.06558	1	-1.51359	0.933908	1.63304	0.0397059		AT1G30840.1	ATPUP4, PUP4	purine permease 4	52.94	1e-06
	2	UN076751	-1.10339	0.105108	-0.0296626	1	-1.57268	0.0273051	---	---		AT4G05050.1	UBQ11	ubiquitin 11	100	1e-55
	2	UN030142	-0.261255	1	-1.21848	1	-0.057912	1	1.57146	0.00812028		AT2G16250.1	---	Leucine-rich repeat protein kinase family protein	34.68	5e-18
	2	UN031756	-0.238518	1	-2.15821	1	-0.3316	1	2.14862	0.0282413		AT3G07040.1	RPM1, RPS3	NB-ARC domain-containing disease resistance protein	34.71	1e-40
	2	UN012645	0.213684	1	-2.5812	0.000677443	-0.969797	1	---	---		ATMG00580.1	NAD4	NADH dehydrogenase subunit 4	91.92	0
	2	UN029836	0.19027	1	-0.935311	1	0.0445237	1	1.32745	0.044707		AT1G13570.1	---	F-box/RNI-like superfamily protein	37.38	6e-30
	2	UN030158	-0.351329	1	-0.974752	1	0.298816	1	1.69025	0.0428046		AT4G34370.1	ATARI1, ARI1	RING/U-box superfamily protein	66.97	7e-106
	2	UN007934	-0.174702	1	-0.435908	1	0.181492	1	1.30396	0.0197837		AT1G12770.1	ISE1, EMB1586	P-loop containing nucleoside triphosphate hydrolases superfamily protein	65.43	1e-106
	2	UN027188	-0.224747	1	-0.45572	1	0.120532	1	1.49135	0.00410353		AT5G06620.1	ATXR4, SDG38	SET domain protein 38	60.5	1e-114
	2	UN016567	-0.501266	1	-0.403395	1	-0.803971	1	2.01227	0.00102012		AT1G61170.1	---	unknown protein; FUNCTIONS IN: molecular_function unknown; INVOLVED IN: N-terminal protein myristoylation; LOCATED IN: cellular_component unknown; EXPRESSED IN: 19 plant structures; EXPRESSED DURING: 12 growth stages; BEST Arabidopsis thaliana protein match is: unknown protein (TAIR:AT1G11125.1); Has 54 Blast hits to 54 proteins in 15 species: Archae - 0; Bacteria - 0; Metazoa - 17; Fungi - 0; Pl…	35.8	8e-07
	2	UN017493	-0.332599	1	-0.614773	1	-0.789042	1	1.99064	0.0287844		AT2G31810.1	---	ACT domain-containing small subunit of acetolactate synthase protein	74.45	0
	2	UN013847	-0.861331	0.565365	-0.0962522	1	-0.275163	1	1.92185	0.00017573		AT3G58630.1	---	sequence-specific DNA binding transcription factors	65.22	3e-36
	2	UN014815	-0.087718	1	-0.047689	1	-0.101842	1	1.52306	0.0433346		AT4G34660.1	---	SH3 domain-containing protein	76.01	0
	2	UN035796	---	---	-0.22453	1	---	---	1.8736	0.035721		---	---	---	---	---
	2	UN019038	-0.0214248	1	-0.49435	1	-0.214656	1	-1.37865	0.0186492		AT4G18060.1	---	SH3 domain-containing protein	51.1	5e-104
	2	UN026144	-0.562086	1	-0.238619	1	-0.170884	1	-1.12102	0.0473859		AT5G09995.2	---	unknown protein; BEST Arabidopsis thaliana protein match is: unknown protein (TAIR:AT1G08530.1); Has 35333 Blast hits to 34131 proteins in 2444 species: Archae - 798; Bacteria - 22429; Metazoa - 974; Fungi - 991; Plants - 531; Viruses - 0; Other Eukaryotes - 9610 (source: NCBI BLink).	62.43	9e-73
	2	UN008821	0.0404304	1	-0.0861196	1	-0.435582	1	-1.38197	0.0391152		AT5G64930.1	CPR5, HYS1	CPR5 protein, putative	36.03	3e-92
	2	UN018609	-0.298894	1	0.171234	1	-0.0165897	1	-1.13992	0.0417658		AT1G52340.1	ABA2, SIS4, GIN1, SDR1, ISI4, SRE1, ATABA2, ATSDR1	NAD(P)-binding Rossmann-fold superfamily protein	51.12	2e-73
	2	UN016947	-0.0921181	1	-0.148017	1	-0.38321	1	-1.40604	0.00962089		AT3G18680.1	---	Amino acid kinase family protein	90.57	2e-163
	2	UN009887	-0.461874	1	-1.77841	0.593893	-2.41303	0.0232061	-0.0809895	1		AT2G38310.1	PYL4, RCAR10	PYR1-like 4	77.5	5e-81
	2	UN005611	-0.193673	1	-0.676997	1	-1.41669	0.0393309	-0.0767732	1		AT1G47056.1	VFB1	VIER F-box proteine 1	61.78	0
	2	UN015307	-0.0480001	1	-0.906119	1	-1.90302	0.00989154	-0.0411401	1		AT2G44890.1	CYP704A1	cytochrome P450, family 704, subfamily A, polypeptide 1	33.48	3e-67
	2	UN017218	0.0153291	1	-0.685877	1	-1.99563	7.51412e-05	0.101305	1		AT3G10190.1	---	Calcium-binding EF-hand family protein	47.02	3e-39
	2	UN010075	-0.0428059	1	-1.22752	1	-2.85091	6.83565e-07	-0.565723	1		AT5G60900.1	RLK1	receptor-like protein kinase 1	44.59	6e-13
	2	UN012042	-0.175295	1	-1.36949	1	-4.22452	0.000103526	-0.654734	1		AT3G61880.2	CYP78A9	cytochrome p450 78a9	68.52	0
	2	UN019341	0.0545189	1	-0.867682	1	-1.54231	0.0118588	-0.290678	1		AT5G54160.1	ATOMT1, OMT1	O-methyltransferase 1	65.62	1e-178
	2	UN016436	-0.154879	1	-1.3183	1	-2.04378	0.000189132	-0.779178	1		AT1G71695.1	---	Peroxidase superfamily protein	67.58	1e-148
	2	UN032530	-0.822731	0.559205	-1.43082	1	-2.44764	0.0469445	0.301429	1		AT4G17030.1	ATEXLB1, EXPR, AT-EXPR, ATEXPR1, ATHEXP BETA 3.1, EXLB1	expansin-like B1	52.69	3e-65
	2	UN009032	-0.522123	1	-0.7185	1	-1.67813	0.000754256	0.0851096	1		AT5G46050.1	ATPTR3, PTR3	peptide transporter 3	69.52	0
	2	UN031551	-0.582058	1	-1.45315	1	-4.07002	0.0460719	0.280338	1		AT5G10750.1	---	Protein of unknown function (DUF1336)	68.12	4e-122
	2	UN032652	-0.496429	1	-0.710283	1	-2.07565	0.000355482	0.157137	1		AT2G09990.1	---	Ribosomal protein S5 domain 2-like superfamily protein	90.07	5e-94
	2	UN010234	-0.895744	0.943547	-1.1777	1	-1.90504	0.0182528	-0.210137	1		AT5G06390.1	FLA17	FASCICLIN-like arabinogalactan protein 17 precursor	71.22	0
	2	UN014382	-0.567403	0.606786	-0.100588	1	-1.697	0.0209112	0.366558	1		AT2G17630.1	---	Pyridoxal phosphate (PLP)-dependent transferases superfamily protein	77.6	0
	2	UN027229	-1.3944	1	-0.539003	1	-5.5452	9.58407e-05	0.384131	1		AT5G05340.1	---	Peroxidase superfamily protein	66.02	4e-123
	2	UN022105	-0.254261	1	-0.500571	1	-1.91104	0.00870203	0.485955	1		AT5G13780.1	---	Acyl-CoA N-acyltransferases (NAT) superfamily protein	90.97	1e-105
	2	UN004146	-0.561052	1	-0.392308	1	-2.05782	0.00186135	0.326071	1		AT3G15010.1	---	RNA-binding (RRM/RBD/RNP motifs) family protein	69.01	9e-112
	2	UN012026	-0.650038	1	-0.694714	1	-2.38545	0.0102979	0.491366	1		AT1G74450.1	---	Protein of unknown function (DUF793)	66.15	2e-60
	2	UN025036	-0.325696	1	-0.364396	1	-1.5496	0.0373185	0.320276	1		AT1G24450.1	NFD2	Ribonuclease III family protein	51.72	1e-49
	2	UN008773	-0.407166	1	-0.268551	1	-1.77675	0.000730828	0.40824	1		AT4G17260.1	---	Lactate/malate dehydrogenase family protein	80.6	0
	2	UN033967	-0.877197	0.0746219	-0.786649	1	-3.9185	6.75249e-10	1.02845	1		AT2G02850.1	ARPN	plantacyanin	55.04	2e-45
	2	UN004403	-0.283159	1	0.122304	1	-1.3217	0.0285046	-0.260151	1		AT5G64410.1	ATOPT4, OPT4	oligopeptide transporter 4	77.34	0
	2	UN021361	-0.280749	1	0.187813	1	-2.10173	0.00784002	-0.18553	1		AT5G49700.1	---	Predicted AT-hook DNA-binding family protein	63.83	5e-46
	2	UN012982	0.0516874	1	0.378294	1	-5.67007	0.0117215	-0.681025	1		AT5G15710.1	---	Galactose oxidase/kelch repeat superfamily protein	26.8	3e-32
	2	UN025963	-0.10431	1	0.0925151	1	-1.54981	0.0457357	-0.196061	1		AT5G20650.1	COPT5	copper transporter 5	59.09	1e-10
	2	UN017405	-0.31224	1	0.0652118	1	-1.27671	0.0487906	-0.0860525	1		AT1G68070.1	---	Zinc finger, C3HC4 type (RING finger) family protein	53.28	3e-108
	2	UN014114	-0.908509	0.0535453	0.354405	1	-3.25256	2.09621e-10	0.125007	1		AT3G51240.1	F3H, TT6, F3'H	flavanone 3-hydroxylase	84.06	0
	2	UN022469	-0.557368	0.841119	0.282336	1	-1.98022	0.024976	-0.0789139	1		AT4G24380.1	---	INVOLVED IN: 10-formyltetrahydrofolate biosynthetic process, folic acid and derivative biosynthetic process; EXPRESSED IN: 24 plant structures; EXPRESSED DURING: 15 growth stages; CONTAINS InterPro DOMAIN/s: Serine hydrolase (InterPro:IPR005645); BEST Arabidopsis thaliana protein match is: alpha/beta-Hydrolases superfamily protein (TAIR:AT5G65400.1); Has 30201 Blast hits to 17322 proteins in 780 …	46.76	9e-73
	2	UN026313	-0.618552	0.913651	0.230976	1	-1.63478	0.0173199	-0.220868	1		AT4G27435.1	---	Protein of unknown function (DUF1218)	65.32	5e-61
	2	UN006927	0.0642211	1	0.0223016	1	-1.41331	0.0080505	-0.0554915	1		AT5G17860.1	CAX7	calcium exchanger 7	55.5	7e-45
	2	UN018307	0.105928	1	-0.0794427	1	-1.83243	0.00556276	-0.0770128	1		AT4G29830.1	VIP3	Transducin/WD40 repeat-like superfamily protein	80.69	0
	2	UN024526	0.124241	1	-0.0747298	1	-2.83162	0.000947618	0.169054	1		AT1G17530.1	ATTIM23-1, TIM23-1	translocase of inner mitochondrial membrane 23	63.33	7e-68
	2	UN008077	-0.531165	1	0.277161	1	-3.52344	3.76471e-09	0.328349	1		AT4G36220.1	FAH1, CYP84A1	ferulic acid 5-hydroxylase 1	68.97	0
	2	UN031858	-0.249435	1	0.024818	1	-1.85556	0.0407619	0.0241647	1		AT5G46050.1	ATPTR3, PTR3	peptide transporter 3	69.61	4e-30
	2	UN009483	-0.187528	1	-0.115005	1	-1.32205	0.0205045	-0.0355425	1		AT5G54400.1	---	S-adenosyl-L-methionine-dependent methyltransferases superfamily protein	73.04	2e-100
	2	UN022685	-0.4131	1	-0.302403	1	-2.75803	0.00359377	-0.20762	1		AT4G13180.1	---	NAD(P)-binding Rossmann-fold superfamily protein	64.29	7e-82
	2	UN012116	-0.799032	1	-0.571416	1	-5.43138	0.0284492	-0.822563	1		AT2G35530.1	bZIP16, AtbZIP16	basic region/leucine zipper transcription factor 16	52.23	5e-87
	2	UN019372	-0.261636	1	-0.108029	1	-1.34242	0.0105159	-0.233931	1		AT1G78300.1	GRF2, 14-3-3OMEGA, GF14 OMEGA	general regulatory factor 2	88.28	1e-164
	2	UN023164	-0.38413	1	-0.165237	1	-2.05343	0.00164214	-0.373636	1		AT3G27280.2	ATPHB4, PHB4	prohibitin 4	82.44	2e-134
	2	UN031085	-0.417656	1	-0.161938	1	-2.01243	0.000941454	---	---		AT2G09990.1	---	Ribosomal protein S5 domain 2-like superfamily protein	90.07	5e-94
	2	UN008982	-0.417726	1	-1.30508	1	-6.20353	0.000321877	-0.338572	1		AT1G68090.1	ANNAT5, ANN5	annexin 5	32.7	1e-18
	2	UN039532	-0.415989	1	-1.10659	1	-5.92402	1.20859e-06	---	---		---	---	---	---	---
	2	UN005749	-0.950403	0.666907	-0.318875	1	-1.65779	0.040166	-0.0806863	1		AT1G77360.1	---	Tetratricopeptide repeat (TPR)-like superfamily protein	28.32	2e-54
	2	UN012651	-0.84769	0.534288	-0.38979	1	-1.76953	0.00170237	-0.214428	1		AT4G28100.1	---	unknown protein; FUNCTIONS IN: molecular_function unknown; INVOLVED IN: biological_process unknown; LOCATED IN: anchored to plasma membrane, anchored to membrane; EXPRESSED IN: 23 plant structures; EXPRESSED DURING: 14 growth stages; BEST Arabidopsis thaliana protein match is: unknown protein (TAIR:AT3G18050.1); Has 30201 Blast hits to 17322 proteins in 780 species: Archae - 12; Bacteria - 1396; …	77.82	1e-138
	2	UN003780	-1.04224	0.493983	-0.351839	1	-2.06363	1.84699e-05	0.234322	1		---	---	---	---	---
	2	UN012831	-0.661893	0.76839	-0.197081	1	-1.47575	0.00784002	0.130228	1		AT5G24930.1	ATCOL4, COL4	CONSTANS-like 4	46.49	1e-91
	2	UN026546	-1.53985	1	-0.421313	1	-4.50624	0.00358902	-0.0600596	1		AT5G40650.1	SDH2-2	succinate dehydrogenase 2-2	88.11	2e-152
	2	UN006398	-0.630144	0.676416	-0.0516779	1	-1.56712	0.0080505	-0.0292424	1		AT4G02500.1	ATXT2, XXT2, XT2	UDP-xylosyltransferase 2	78.19	0
	2	UN033032	-1.16973	0.00356564	0.00677401	1	-2.76639	6.75154e-11	-0.140023	1		AT5G13930.1	CHS, TT4, ATCHS	Chalcone and stilbene synthase family protein	85.71	9e-157
	2	UN010433	-0.955522	0.0324431	-0.0842539	1	-1.73616	0.000456516	-0.631573	1		AT1G65060.1	4CL3	4-coumarate:CoA ligase 3	74.34	0
	2	UN007586	-0.505109	1	-0.344403	1	-1.62044	0.00647394	-0.337692	1		AT4G01870.1	---	tolB protein-related	59.73	0
	2	UN036719	-0.756463	0.611872	-0.456114	1	-2.05757	0.0388525	---	---		---	---	---	---	---
	2	UN021489	-0.653475	0.913651	-0.171726	1	-2.1511	0.000948116	-0.580916	1		AT5G54530.1	---	Protein of unknown function, DUF538	57.04	6e-53
	2	UN043845	-1.10882	0.0602638	-0.0266078	1	-2.95273	1.45811e-09	-0.718566	1		AT5G13930.1	CHS, TT4, ATCHS	Chalcone and stilbene synthase family protein	90.26	1e-128
	2	UN014203	-0.906746	0.0488595	-0.372488	1	-0.904895	0.242985	0.108968	1		AT2G39050.1	---	hydroxyproline-rich glycoprotein family protein	68.15	2e-77
	2	UN085293	-0.302624	1	-0.814117	1	-1.45965	0.0195299	---	---		AT3G52590.1	UBQ1, EMB2167, ERD16, HAP4	ubiquitin extension protein 1	100	8e-27
	2	UN021431	-0.422228	1	-0.0909018	1	-1.35289	0.019402	-1.20474	1		AT1G55000.1	---	peptidoglycan-binding LysM domain-containing protein	63.59	7e-102
	2	UN026578	-0.530152	1	-0.0213664	1	-1.47368	0.0362203	-1.41444	1		AT4G32260.1	---	ATPase, F0 complex, subunit B/B', bacterial/chloroplast	77.78	9e-50
	2	UN023355	-0.981056	1	-1.30937	1	-3.50001	0.0351606	---	---		AT2G17230.1	EXL5	EXORDIUM like 5	72.76	1e-155
	2	UN006763	0.528815	1	-0.355644	1	-1.43937	0.0197797	-1.13049	1		---	---	---	---	---
	2	UN001498	0.600321	0.660651	-0.924953	1	-1.90179	0.00597367	-1.51906	1		AT4G28570.1	---	Long-chain fatty alcohol dehydrogenase family protein	30.85	6e-07
	2	UN009216	0.293215	1	-0.0783993	1	-1.26949	0.0345919	-0.730552	0.558288		AT3G20770.1	EIN3, AtEIN3	Ethylene insensitive 3 family protein	71.81	7e-146
	2	UN021209	0.764913	0.655424	-0.373563	1	-1.91368	0.0182761	-1.13509	1		AT4G13510.1	AMT1;1, ATAMT1, ATAMT1;1	ammonium transporter 1;1	80.23	1e-118
	2	UN015863	0.0404162	1	0.195581	1	-1.31046	0.0335518	-0.754564	0.987235		AT2G17420.1	NTRA, ATNTRA, NTR2	NADPH-dependent thioredoxin reductase A	78.55	0
	2	UN017742	0.272202	1	0.015603	1	-2.74875	1	-2.16402	0.0104586		AT5G07900.1	---	Mitochondrial transcription termination factor family protein	43.75	3e-36
	2	UN022235	-0.0140938	1	0.0740678	1	-1.66512	0.0278653	-1.13808	1		AT1G11360.1	---	Adenine nucleotide alpha hydrolases-like superfamily protein	74.74	4e-90
	2	UN012468	0.116629	1	-0.281067	1	-1.41188	0.00622556	-1.06533	1		AT4G13930.1	SHM4	serine hydroxymethyltransferase 4	88.54	0
	2	UN006812	0.110356	1	-0.258325	1	-1.33857	0.0297183	-0.863281	1		AT5G41330.1	---	BTB/POZ domain with WD40/YVTN repeat-like protein	58.52	6e-162
	2	UN014196	0.0770778	1	-0.234849	1	-1.68164	0.020583	-1.03359	1		AT1G78600.2	LZF1	light-regulated zinc finger protein 1	48.03	5e-62
	2	UN014443	-0.281945	1	-0.459618	1	-1.68914	0.0211451	-1.38141	0.739457		AT3G57490.1	---	Ribosomal protein S5 family protein	89.45	3e-146
	2	UN014535	-0.362077	1	-0.502537	1	-2.27745	0.00109172	-1.74204	1		AT2G21130.1	---	Cyclophilin-like peptidyl-prolyl cis-trans isomerase family protein	83.53	4e-97
	2	UN016810	-0.649238	0.94602	-0.383493	1	-2.7134	1.84864e-07	-2.00149	1		AT4G20440.1	smB	small nuclear ribonucleoprotein associated protein B	81.21	5e-49
	2	UN019209	-0.325582	1	-0.186425	1	-1.78891	0.0135206	-0.940534	1		AT1G55000.1	---	peptidoglycan-binding LysM domain-containing protein	63.59	7e-102
	2	UN016877	-0.137272	1	-0.440875	1	-2.04222	0.0235157	-1.34281	1		AT2G31160.1	LSH3	Protein of unknown function (DUF640)	88.64	2e-73
	2	UN014958	-0.0941872	1	-0.253419	1	-1.54049	0.00965119	-0.789356	1		---	---	---	---	---
	2	UN009238	0.44351	0.834762	-0.199775	1	-3.09148	4.45136e-05	---	---		AT1G08250.1	ADT6	arogenate dehydratase 6	81.05	0
	2	UN001706	0.269302	1	-0.00319625	1	-0.534654	1	-1.19029	0.00738929		AT1G09970.2	LRR XI-23, RLK7	Leucine-rich receptor-like protein kinase family protein	59.79	0
	2	UN012062	-0.151484	1	0.253337	1	-1.67696	0.000170273	-1.77049	1		AT2G30490.1	ATC4H, C4H, CYP73A5, REF3	cinnamate-4-hydroxylase	84.84	0
	2	UN021918	0.0264377	1	0.148539	1	-1.59907	0.0134867	-1.46233	1		AT5G46230.1	---	Protein of unknown function, DUF538	54.17	2e-57
	2	UN011097	0.263932	1	-7.91135e-05	1	-1.28352	0.0107571	-1.21391	1		AT5G25110.1	CIPK25, SnRK3.25	CBL-interacting protein kinase 25	71.76	0
	2	UN014036	0.52929	0.787206	0.292235	1	-1.41774	0.0273051	-1.72095	1		AT1G55760.1	---	BTB/POZ domain-containing protein	66.77	9e-169
	2	UN013755	0.697286	0.168062	0.265243	1	-1.48903	0.00333305	-1.40792	1		AT4G32390.1	---	Nucleotide-sugar transporter family protein	80.06	0
	2	UN033349	0.77918	1	0.394465	1	-2.18664	1	-2.05714	4.27871e-06		AT1G79620.1	---	Leucine-rich repeat protein kinase family protein	54.12	2e-53
	2	UN017931	1.25899	0.0460858	0.0139352	1	-1.73483	0.0375837	-1.67079	1		AT5G05320.1	---	FAD/NAD(P)-binding oxidoreductase family protein	50.81	2e-110
	2	UN025452	1.97163	1	0.685651	1	-2.61486	1	-2.55192	0.000185843		---	---	---	---	---
	2	UN041648	3.55179	4.38683e-37	2.30842	1	-5.22573	1.00962e-12	---	---		---	---	---	---	---
	2	UN035791	4.32017	0.030097	-1.20029	1	-1.88516	1	---	---		AT4G35190.1	---	Putative lysine decarboxylase family protein	75.34	1e-99
	2	UN060596	1.27133	0.000495419	0.327591	1	-1.10195	0.277446	---	---		AT4G05050.1	UBQ11	ubiquitin 11	98.36	9e-83
	2	UN023111	0.0734137	1	2.71639	1	-4.06414	0.723966	-2.46152	8.92168e-08		AT2G37460.1	---	nodulin MtN21 /EamA-like transporter family protein	33.56	4e-44
	2	UN016521	-0.979112	0.099496	0.216685	1	-1.8558	0.0372371	-1.10719	1		AT5G42800.1	DFR, TT3, M318	dihydroflavonol 4-reductase	67.49	2e-160
	2	UN017994	-1.06794	0.283434	0.181734	1	-2.84319	0.000835741	-1.95964	0.934445		AT3G13540.1	ATMYB5, MYB5	myb domain protein 5	69.67	6e-60
	2	UN006541	-0.673468	0.586416	0.483877	1	-1.99389	0.00139185	-0.510088	1		AT1G61720.1	BAN	NAD(P)-binding Rossmann-fold superfamily protein	60.96	6e-150
	2	UN012228	-0.602792	0.551113	0.635768	1	-2.65548	1.06142e-10	-0.668194	1		AT5G07990.1	TT7, CYP75B1, D501	Cytochrome P450 superfamily protein	60.23	1e-56
	2	UN016935	-0.492216	0.957974	0.603737	1	-1.88519	1.29625e-05	-0.699133	1		AT2G23910.1	---	NAD(P)-binding Rossmann-fold superfamily protein	50.17	5e-88
	2	UN026797	-0.771665	0.124799	0.658759	1	-2.51372	1.7465e-09	-1.1524	1		AT5G13930.1	CHS, TT4, ATCHS	Chalcone and stilbene synthase family protein	92.8	2e-150
	2	UN029494	-0.164098	1	0.417276	1	-1.58238	0.033605	-0.672293	1		AT1G10155.1	ATPP2-A10, PP2-A10	phloem protein 2-A10	39.01	9e-34
	2	UN012577	-0.255303	1	-0.0257013	1	-1.9262	0.00627869	-0.700761	1		AT1G74470.1	---	Pyridine nucleotide-disulphide oxidoreductase family protein	62.9	7e-49
	2	UN014647	-0.31006	1	0.0588677	1	-2.05783	0.0279012	-0.838209	1		AT2G41060.1	---	RNA-binding (RRM/RBD/RNP motifs) family protein	53.92	2e-75
	2	UN017579	-0.161092	1	0.121824	1	-1.60997	0.0347392	-0.458985	1		AT1G12910.1	ATAN11, LWD1	Transducin/WD40 repeat-like superfamily protein	89.88	0
	2	UN013350	-0.153752	1	0.215506	1	-1.62369	0.0463938	-0.641253	1		AT3G05200.1	ATL6	RING/U-box superfamily protein	41.18	2e-58
	2	UN033031	-0.162237	1	0.197118	1	-2.0367	2.89897e-05	-0.962499	1		AT5G13930.1	CHS, TT4, ATCHS	Chalcone and stilbene synthase family protein	85.31	8e-156
	2	UN011850	0.0994864	1	0.373881	1	-1.56671	0.0262467	-0.40092	1		AT5G47870.1	---	FUNCTIONS IN: molecular_function unknown; INVOLVED IN: biological_process unknown; LOCATED IN: chloroplast; EXPRESSED IN: 22 plant structures; EXPRESSED DURING: 13 growth stages; BEST Arabidopsis thaliana protein match is: cobalt ion binding (TAIR:AT1G71310.1); Has 1807 Blast hits to 1807 proteins in 277 species: Archae - 0; Bacteria - 0; Metazoa - 736; Fungi - 347; Plants - 385; Viruses - 0; Oth…	75	2e-76
	2	UN013293	0.439496	1	0.203479	1	-2.29595	0.00333305	-0.618414	1		AT4G13710.1	---	Pectin lyase-like superfamily protein	78.82	0
	2	UN006967	0.340649	1	0.0338109	1	-1.20227	0.0373185	-0.450294	1		AT1G47056.1	VFB1	VIER F-box proteine 1	62.32	0
	2	UN014831	0.48319	0.698055	0.250049	1	-1.55963	0.00251644	-0.709156	1		AT3G12120.1	FAD2	fatty acid desaturase 2	75.52	0
	2	UN011872	0.251723	1	-0.462526	1	-2.06272	0.0107439	-0.65966	1		AT1G49780.1	PUB26	plant U-box 26	59.06	3e-119
	2	UN016736	0.197337	1	-0.058253	1	-1.40879	0.00189779	-0.261224	1		AT4G39090.1	RD19, RD19A	Papain family cysteine protease	74.05	3e-164
	2	UN007768	-0.0042593	1	-0.103205	1	-2.31706	0.00029674	-0.66135	1		AT4G01070.1	GT72B1, UGT72B1	UDP-Glycosyltransferase superfamily protein	59.12	0
	2	UN019317	0.0933552	1	0.0452165	1	-1.94674	0.000107276	-0.561867	1		AT1G16210.1	---	unknown protein; CONTAINS InterPro DOMAIN/s: Protein of unknown function DUF1014 (InterPro:IPR010422); Has 16107 Blast hits to 8386 proteins in 1107 species: Archae - 26; Bacteria - 3370; Metazoa - 4013; Fungi - 1516; Plants - 526; Viruses - 120; Other Eukaryotes - 6536 (source: NCBI BLink).	69.29	4e-63
	2	UN022844	0.03955	1	-0.0108966	1	-1.44198	0.009836	-0.300505	1		AT1G65720.1	---	unknown protein; FUNCTIONS IN: molecular_function unknown; INVOLVED IN: biological_process unknown; LOCATED IN: endomembrane system; EXPRESSED IN: 24 plant structures; EXPRESSED DURING: 15 growth stages; Has 44 Blast hits to 44 proteins in 14 species: Archae - 0; Bacteria - 0; Metazoa - 0; Fungi - 0; Plants - 44; Viruses - 0; Other Eukaryotes - 0 (source: NCBI BLink).	43.64	8e-18
	2	UN009443	-0.0448865	1	-0.262454	1	-1.40636	0.02312	-0.523542	1		---	---	---	---	---
	2	UN015266	-0.196219	1	-1.0891	1	-4.03941	2.11301e-18	-1.59769	1		AT5G01410.1	PDX1, ATPDX1.3, RSR4, PDX1.3, ATPDX1	Aldolase-type TIM barrel family protein	91.59	0
	2	UN019431	-0.0791187	1	-0.386313	1	-1.20385	0.0471783	-0.376599	1		AT2G40060.1	---	Clathrin light chain protein	67.92	2e-64
	2	UN005429	-0.26441	1	-0.3573	1	-1.40296	0.0422344	-0.426724	1		AT1G21680.1	---	DPP6 N-terminal domain-like protein	62.33	0
	2	UN020232	-0.400397	1	-0.718206	1	-1.92855	0.0238254	-0.518104	1		AT3G44940.1	---	Protein of unknown function (DUF1635)	45.04	1e-23
	2	UN012311	-0.214327	1	-0.752097	1	-1.67047	0.0160152	-0.445279	1		AT1G11580.1	ATPMEPCRA, PMEPCRA	methylesterase PCR A	54.12	0
	2	UN086785	-0.241082	1	-0.665983	1	-1.59569	0.0181138	-0.42208	1		AT4G05050.1	UBQ11	ubiquitin 11	100	6e-42
	3	UN002274	0.43325	1	0.852222	1	2.84597	2.32094e-05	-1.80214	0.233251		AT1G15520.1	PDR12, ATPDR12, ABCG40, ATABCG40	pleiotropic drug resistance 12	63.21	4e-178
	3	UN003136	0.0636679	1	0.605459	1	1.79715	0.0191606	-1.18832	1		AT1G67720.1	---	Leucine-rich repeat protein kinase family protein	61.82	0
	3	UN009282	0.0617327	1	0.373217	1	2.64139	9.88169e-08	-1.55793	1		AT3G18000.1	NMT1, XPL1, PEAMT	S-adenosyl-L-methionine-dependent methyltransferases superfamily protein	79.55	0
	3	UN008891	0.135567	1	0.0220223	1	2.40329	0.00438256	-1.82541	0.606731		---	---	---	---	---
	3	UN010269	0.0433968	1	-0.340801	1	2.93202	0.0278634	-1.8639	1		AT3G14470.1	---	NB-ARC domain-containing disease resistance protein	34.72	6e-25
	3	UN010700	-0.129816	1	-0.180182	1	1.28203	0.014764	-0.713258	1		AT3G52880.2	ATMDAR1, MDAR1	monodehydroascorbate reductase 1	69.1	0
	3	UN002471	-0.207488	1	-0.185433	1	1.98245	1.29625e-05	-1.9202	1		AT1G02640.1	BXL2, ATBXL2	beta-xylosidase 2	69.24	0
	3	UN010989	-0.51675	1	-0.278074	1	4.30208	0.800567	-3.46768	3.83698e-12		AT3G45590.1	ATSEN1, SEN1	splicing endonuclease 1	56.36	3e-88
	3	UN001812	0.0644175	1	-0.76426	1	2.11988	0.217705	-1.27367	0.0222253		AT1G47890.1	AtRLP7, RLP7	receptor like protein 7	33.9	2e-130
	3	UN029556	0.0684776	1	-0.594102	1	1.83432	0.0252379	---	---		AT4G27280.1	---	Calcium-binding EF-hand family protein	66.36	2e-32
	3	UN031619	0.758314	1	-0.761669	1	2.66108	1	-2.01428	0.00438332		AT5G54590.2	CRLK1	Protein kinase superfamily protein	71.71	3e-72
	3	UN031543	1.92771	0.766732	1.23736	1	3.11102	0.00837543	---	---		AT2G22850.1	AtbZIP6, bZIP6	basic leucine-zipper 6	46.48	3e-10
	3	UN001539	0.583118	1	0.0919828	1	1.3865	0.0438849	-0.832158	1		---	---	---	---	---
	3	UN016138	1.50185	0.863981	0.247108	1	4.39787	6.75249e-10	-1.95364	1		AT2G38860.2	YLS5	Class I glutamine amidotransferase-like superfamily protein	52.67	1e-148
	3	UN007708	3.51676	0.815434	-0.938722	1	5.55544	0.004693	-3.69723	1		AT3G07020.2	---	UDP-Glycosyltransferase superfamily protein	73.66	0
	3	UN018642	1.76282	0.918893	-0.850984	1	4.27421	0.0469445	-2.3753	1		AT4G35160.1	---	O-methyltransferase family protein	36.94	5e-70
	3	UN033876	1.89497	6.5311e-05	-0.300429	1	2.43763	1.12797e-05	-1.00142	1		---	---	---	---	---
	3	UN002174	---	---	---	---	4.97758	0.0488297	-1.59769	1		AT3G02060.1	---	DEAD/DEAH box helicase, putative	79.29	0
	3	UN051026	---	---	---	---	2.00678	1	1.84	0.00926227		AT1G58410.1	---	Disease resistance protein (CC-NBS-LRR class) family	30.58	1e-10
	3	UN001757	2.45827	1	0.418003	1	2.81602	0.000399114	0.376401	1		AT1G54490.1	AIN1, EIN5, XRN4, ATXRN4	exoribonuclease 4	81.35	6e-82
	3	UN007801	2.53005	0.0388475	-0.0729736	1	3.0548	1.40592e-05	-0.360763	1		---	---	---	---	---
	3	UN021793	3.1931	1	1.25505	1	4.90003	0.00669443	-1.42851	1		---	---	---	---	---
	3	UN011118	1.80247	0.960841	0.865025	1	2.72527	0.00642257	-0.021202	1		AT4G21760.1	BGLU47	beta-glucosidase 47	55.97	0
	3	UN012928	2.37134	1	0.912655	1	3.5452	0.000215708	-0.371199	1		AT4G38810.2	---	Calcium-binding EF-hand family protein	64.24	5e-135
	3	UN007326	1.07567	1	0.746864	1	2.05377	0.00127607	-0.367819	1		AT3G22060.1	---	Receptor-like protein kinase-related family protein	36.89	5e-40
	3	UN041843	4.24722	1	2.96835	1	8.19496	1.0949e-22	-0.962499	1		AT3G05950.1	---	RmlC-like cupins superfamily protein	67.43	1e-77
	3	UN003014	---	---	---	---	5.37054	0.0112504	-0.133413	1		AT5G01110.1	---	Tetratricopeptide repeat (TPR)-like superfamily protein	31.35	2e-108
	3	UN012560	1.09243	0.072915	0.655288	1	1.68527	0.0118588	1.38122	0.106913		AT2G18690.1	---	unknown protein; FUNCTIONS IN: molecular_function unknown; INVOLVED IN: biological_process unknown; LOCATED IN: membrane; EXPRESSED IN: 17 plant structures; EXPRESSED DURING: 9 growth stages; CONTAINS InterPro DOMAIN/s: Protein of unknown function DUF975 (InterPro:IPR010380); BEST Arabidopsis thaliana protein match is: unknown protein (TAIR:AT2G18680.1); Has 213 Blast hits to 211 proteins in 20 s…	30.3	6e-19
	3	UN009692	0.254069	1	3.55357	1	4.13108	0.902265	3.65748	0.0132838		AT4G03400.1	DFL2, GH3-10	Auxin-responsive GH3 family protein	67.56	0
	3	UN027370	-0.124504	1	---	---	3.46492	0.921473	3.14371	0.000807833		AT5G01660.1	---	CONTAINS InterPro DOMAIN/s: Galactose oxidase/kelch, beta-propeller (InterPro:IPR011043), Kelch repeat type 1 (InterPro:IPR006652), Development/cell death domain (InterPro:IPR013989), Kelch related (InterPro:IPR013089), Kelch-type beta propeller (InterPro:IPR015915); BEST Arabidopsis thaliana protein match is: DCD (Development and Cell Death) domain protein (TAIR:AT3G11000.1); Has 16133 Blast hit…	54.24	1e-18
	3	UN000085	0.515755	1	-0.261391	1	1.45736	0.0095585	0.618241	1		AT5G04560.2	DME	HhH-GPD base excision DNA repair family protein	69.88	0
	3	UN000044	0.630788	1	0.0556943	1	1.63635	0.0281007	0.444131	1		AT2G48060.1	---	unknown protein; FUNCTIONS IN: molecular_function unknown; INVOLVED IN: biological_process unknown; LOCATED IN: endomembrane system; EXPRESSED IN: shoot, sperm cell; CONTAINS InterPro DOMAIN/s: Protein of unknown function DUF3595 (InterPro:IPR021999); Has 533 Blast hits to 341 proteins in 95 species: Archae - 2; Bacteria - 15; Metazoa - 318; Fungi - 0; Plants - 93; Viruses - 0; Other Eukaryotes -…	62.78	0
	3	UN012778	1.72588	0.782841	-0.43765	1	3.77845	0.00146598	1.06762	1		AT1G26560.1	BGLU40	beta glucosidase 40	45.23	8e-155
	3	UN021366	2.27525	0.00796145	-1.30547	1	3.59084	0.945321	3.16485	1		---	---	---	---	---
	3	UN000377	0.648891	1	1.27053	1	2.44319	2.06703e-05	1.48837	0.941623		AT2G31900.1	XIF, ATXIF, ATMYO5	myosin-like protein XIF	74.9	0
	3	UN003861	0.344553	1	1.09801	1	2.31384	0.00790446	1.98983	0.628934		AT5G62890.1	---	Xanthine/uracil permease family protein	80.99	0
	3	UN000174	0.1176	1	0.305183	1	1.66721	0.0254086	1.0532	0.668593		AT2G13370.1	CHR5	CHR5	68.47	0
	3	UN017672	-0.10726	1	1.01079	1	3.83193	0.905437	2.32774	0.012836		AT5G43490.1	---	unknown protein; Has 1807 Blast hits to 1807 proteins in 277 species: Archae - 0; Bacteria - 0; Metazoa - 736; Fungi - 347; Plants - 385; Viruses - 0; Other Eukaryotes - 339 (source: NCBI BLink).	42.02	1e-17
	3	UN012947	0.304041	1	0.397516	1	1.42675	0.024723	0.648746	1		AT5G53050.2	---	alpha/beta-Hydrolases superfamily protein	61.27	5e-173
	3	UN032531	0.91485	1	0.661213	1	5.11003	0.0366047	2.00123	1		---	---	---	---	---
	3	UN011185	1.194	0.194013	0.384977	1	3.52872	3.70814e-05	2.16281	1		AT2G20340.1	---	Pyridoxal phosphate (PLP)-dependent transferases superfamily protein	55.6	0
	3	UN000009	0.54629	0.913651	0.133777	1	2.64676	0.00100366	1.7323	0.00962089		AT1G67120.1	---	ATPases;nucleotide binding;ATP binding;nucleoside-triphosphatases;transcription factor binding	41.57	3e-51
	3	UN000353	0.286594	1	0.174966	1	1.53356	0.00656089	0.988215	0.673393		AT4G30100.1	---	P-loop containing nucleoside triphosphate hydrolases superfamily protein	62.17	0
	3	UN001358	0.0851686	1	0.0620257	1	1.29896	0.0273051	0.814616	0.782996		AT2G32400.1	GLR5, GLR3.7, ATGLR3.7	glutamate receptor 5	54.22	0
	3	UN000023	0.212305	1	0.0553785	1	2.03348	0.0017671	1.09778	0.348128		AT1G58230.1	---	binding	63.67	0
	3	UN035081	0.767728	1	0.0612781	1	4.99341	0.926411	2.62733	0.000123281		AT5G54160.1	ATOMT1, OMT1	O-methyltransferase 1	45.45	3e-09
	3	UN003282	-0.318431	1	0.430076	1	5.16262	0.0365519	0.919832	1		AT5G43745.1	---	Protein of unknown function (DUF1012)	67.21	0
	3	UN000173	-0.00369693	1	0.250505	1	1.55464	0.0182825	0.328571	1		AT1G01040.2	DCL1	dicer-like 1	78.29	0
	3	UN003610	0.0652172	1	0.426746	1	2.02907	0.0469445	0.388703	1		AT1G05700.1	---	Leucine-rich repeat transmembrane protein kinase protein	45.41	0
	3	UN011151	0.167271	1	0.289502	1	1.56525	0.0299281	0.280171	1		AT4G26850.1	VTC2	mannose-1-phosphate guanylyltransferase (GDP)s;GDP-galactose:mannose-1-phosphate guanylyltransferases;GDP-galactose:glucose-1-phosphate guanylyltransferases;GDP-galactose:myoinositol-1-phosphate guanylyltransferases;glucose-1-phosphate guanylyltransferase	36.42	1e-48
	3	UN000979	-0.115629	1	0.0430722	1	1.63647	0.0182989	0.478923	1		AT3G04490.1	---	unknown protein; BEST Arabidopsis thaliana protein match is: unknown protein (TAIR:AT4G38092.1); Has 75 Blast hits to 64 proteins in 20 species: Archae - 0; Bacteria - 0; Metazoa - 36; Fungi - 0; Plants - 22; Viruses - 0; Other Eukaryotes - 17 (source: NCBI BLink).	59.45	0
	3	UN000103	-0.0738266	1	-0.0219813	1	1.39531	0.0277833	0.534706	1		AT1G08060.1	MOM, MOM1	ATP-dependent helicase family protein	34.77	2e-126
	3	UN000216	-0.0484639	1	-0.0771505	1	1.55143	0.0152083	0.587418	1		AT1G63490.1	---	transcription factor jumonji (jmjC) domain-containing protein	49.65	0
	3	UN000079	-0.0489242	1	-0.150181	1	2.93875	0.000409953	0.933055	1		AT3G48190.1	ATM, ATATM	ataxia-telangiectasia mutated	58.93	0
	3	UN000070	-0.112548	1	-0.0769706	1	1.60953	0.0347392	0.474049	1		AT3G24870.1	---	Helicase/SANT-associated, DNA binding protein	40.42	0
	3	UN007909	-0.261565	1	-0.507623	1	7.21543	0.000937567	1.97078	1		---	---	---	---	---
	3	UN008788	0.131311	1	-0.000650877	1	1.62363	0.0497271	0.534138	1		AT4G30490.1	---	AFG1-like ATPase family protein	73.86	0
	3	UN010459	-0.112053	1	0.647556	1	3.93537	2.3682e-06	1.29174	0.73994		AT1G61820.1	BGLU46	beta glucosidase 46	59.92	0
	3	UN036729	-0.227358	1	0.33844	1	2.60768	3.94043e-10	1.29835	1		AT5G39110.1	---	RmlC-like cupins superfamily protein	72.67	1e-87
	3	UN002863	---	---	0.347543	1	6.28624	2.86338e-05	0.00256734	1		---	---	---	---	---
	3	UN002333	---	---	-0.652457	1	8.21429	7.41069e-21	0.778466	1		AT2G35530.1	bZIP16, AtbZIP16	basic region/leucine zipper transcription factor 16	58.31	7e-120
	3	UN011322	-0.320021	1	-0.104346	1	1.80127	0.040166	---	---		AT4G26850.1	VTC2	mannose-1-phosphate guanylyltransferase (GDP)s;GDP-galactose:mannose-1-phosphate guanylyltransferases;GDP-galactose:glucose-1-phosphate guanylyltransferases;GDP-galactose:myoinositol-1-phosphate guanylyltransferases;glucose-1-phosphate guanylyltransferase	36.42	1e-48
	3	UN001944	---	---	---	---	6.25809	0.0196366	0.399433	1		AT5G46400.1	AT PRP39-2, PRP39-2	Tetratricopeptide repeat (TPR)-like superfamily protein	49.36	0
	3	UN006502	-1.82212	1	-0.500454	1	3.31443	1	2.45535	0.000118937		AT3G53870.1	---	Ribosomal protein S3 family protein	86.21	7e-13
	3	UN028206	-2.71342	1	-1.53356	1	6.50262	0.0095585	3.89085	0.903771		---	---	---	---	---
	3	UN002640	-0.232284	1	0.0463621	1	1.31684	0.0135206	0.486077	1		AT4G19110.2	---	Protein kinase superfamily protein	65.67	0
	3	UN015635	-0.817717	1	0.0169034	1	2.29778	0.0415127	0.842922	1		AT2G16460.1	---	Protein of unknown function (DUF1640)	82.72	9e-116
	3	UN018640	-0.506144	1	0.0960375	1	1.75814	0.040377	0.71006	1		AT3G12900.1	---	2-oxoglutarate (2OG) and Fe(II)-dependent oxygenase superfamily protein	55.75	3e-116
	3	UN000039	-0.637784	1	-0.10997	1	2.21956	0.019138	0.957579	1		AT5G24740.1	---	Protein of unknown function (DUF1162)	43.2	0
	3	UN001384	-0.932787	1	0.0389535	1	6.50112	3.83397e-24	4.25875	0.0266008		AT5G25560.2	---	CHY-type/CTCHY-type/RING-type Zinc finger protein	55.22	7e-17
	3	UN001390	-0.339626	1	0.0285314	1	1.26025	0.040166	0.935052	0.501097		AT5G58140.2	PHOT2, NPL1	phototropin 2	69.25	0
	3	UN005907	-0.675875	1	---	---	3.16	1	2.68378	5.83884e-07		AT2G20210.1	---	RNI-like superfamily protein	42	9e-103
	3	UN029257	-0.675875	1	---	---	3.79625	0.660469	2.87077	2.87107e-07		AT4G36690.1	ATU2AF65A	U2 snRNP auxilliary factor, large subunit, splicing factor	82.22	2e-18
	3	UN002922	-0.665528	1	0.403313	1	2.39626	0.0487906	1.21715	1		AT4G38180.1	FRS5	FAR1-related sequence 5	37.37	7e-126
	3	UN050076	-0.47983	1	0.437866	1	1.68226	0.0471783	1.07898	1		AT4G33110.1	---	S-adenosyl-L-methionine-dependent methyltransferases superfamily protein	47.5	2e-29
	3	UN005783	-1.07306	1	0.409656	1	2.80389	0.00176841	2.7055	0.00206738		AT5G27600.1	LACS7, ATLACS7	long-chain acyl-CoA synthetase 7	69.51	0
	3	UN060379	-1.7066	1	0.0237085	1	2.16975	1	2.0603	0.00844693		AT4G37560.1	---	Acetamidase/Formamidase family protein	90.16	4e-65
	3	UN000041	-0.0153475	1	-0.506824	1	1.88715	0.000688901	1.26607	0.176586		AT1G64790.2	ILA	ILITYHIA	70.01	0
	3	UN000042	-0.14194	1	-0.479581	1	1.52086	0.040377	1.03056	0.663215		AT4G30990.2	---	ARM repeat superfamily protein	44.22	0
	3	UN000343	0.128281	1	-0.168464	1	1.5711	0.0182825	1.27614	0.694915		AT5G42400.1	ATXR7, SDG25	SET domain protein 25	51.64	7e-28
	3	UN003534	-0.224248	1	-0.49346	1	1.66429	0.00481332	1.67709	1		AT1G73920.1	---	alpha/beta-Hydrolases superfamily protein	69.84	0
	3	UN006476	-0.154604	1	-0.13109	1	1.40229	0.284367	1.43468	0.00629685		AT3G51830.1	ATG5, SAC8	SAC domain-containing protein 8	62.1	4e-82
	3	UN021975	-0.124504	1	-0.170545	1	2.7635	1	2.64062	0.000383021		AT2G30700.1	---	unknown protein; BEST Arabidopsis thaliana protein match is: unknown protein (TAIR:AT1G61900.1); Has 68 Blast hits to 67 proteins in 13 species: Archae - 0; Bacteria - 2; Metazoa - 0; Fungi - 0; Plants - 66; Viruses - 0; Other Eukaryotes - 0 (source: NCBI BLink).	74.24	1e-24
	3	UN000152	0.0141424	1	-0.172392	1	1.41863	0.22207	1.6294	0.0455282		AT3G11964.1	---	RNA binding;RNA binding	57.8	0
	3	UN027770	---	---	---	---	1.72947	1	1.93846	0.000106898		AT4G20520.1	---	RNA binding;RNA-directed DNA polymerases	33.33	6e-10
	3	UN004507	0.0261495	1	0.165604	1	2.02892	0.0491414	2.03155	0.934269		AT1G58200.1	MSL3	MSCS-like 3	54.59	0
	3	UN000018	0.125364	1	0.118763	1	1.66683	0.429671	1.93721	0.0488869		AT4G17140.3	---	pleckstrin homology (PH) domain-containing protein	57.78	0
	3	UN002815	-0.192568	1	0.24966	1	1.44972	0.0128775	---	---		AT1G53590.1	NTMC2TYPE6.1, NTMC2T6.1	Calcium-dependent lipid-binding (CaLB domain) family protein	52.57	0
	3	UN000012	0.41995	1	0.263984	1	1.81783	0.237607	1.95138	0.000188181		AT1G48090.1	---	calcium-dependent lipid-binding family protein	60.09	0
	3	UN003266	---	---	1.93251	1	5.18357	0.0209054	-0.874828	0.543697		AT1G16830.1	---	Pentatricopeptide repeat (PPR) superfamily protein	39.38	1e-135
	3	UN008026	-4.05115	1	0.823293	1	5.64565	0.00387761	-4.61839	0.465721		---	---	---	---	---
	3	UN012046	-4.73477	0.148758	2.02824	1	5.21907	0.0228918	-4.29096	0.750654		AT2G35530.1	bZIP16, AtbZIP16	basic region/leucine zipper transcription factor 16	55.1	2e-90
	3	UN017877	-2.95263	1	0.890604	1	3.88242	2.86338e-05	-1.84919	1		AT4G38260.1	---	Protein of unknown function (DUF833)	54.38	5e-82
	3	UN002405	-1.36314	1	0.0185382	1	2.76697	2.59455e-05	-0.973696	1		AT1G06840.1	---	Leucine-rich repeat protein kinase family protein	65.23	0
	3	UN022736	-4.42763	1	-0.32816	1	6.10483	0.17909	-2.33434	0.0260214		---	---	---	---	---
	3	UN001672	-1.26508	1	-0.206443	1	2.61633	0.0297183	-1.62239	1		AT1G56500.1	---	haloacid dehalogenase-like hydrolase family protein	71.84	0
	3	UN008434	-1.58112	1	0.0969972	1	2.73177	0.0115679	-1.85575	1		AT1G78070.1	---	Transducin/WD40 repeat-like superfamily protein	71.43	9e-175
	3	UN013101	-2.07548	1	-0.181037	1	5.83328	0.000948116	-4.34881	0.0950408		AT5G10070.2	---	RNase L inhibitor protein-related	81.25	3e-15
	3	UN005097	-0.244761	1	0.0517909	1	1.41533	0.0303202	-0.859719	1		AT1G65790.1	ARK1, RK1	receptor kinase 1	47.29	0
	3	UN017756	-0.865274	1	-0.0161578	1	3.54208	0.0156115	-1.97441	1		---	---	---	---	---
	3	UN030723	-0.431699	0.965879	-0.131175	1	1.36351	0.0313044	-0.715359	1		AT3G04720.1	PR4, HEL, PR-4	pathogenesis-related 4	69.38	2e-67
	3	UN007134	-2.9279	1	0.871228	1	5.14717	0.0292598	1.0542	1		---	---	---	---	---
	3	UN007404	-1.27492	1	0.912722	1	2.46315	0.0258799	0.492499	1		AT1G30270.1	CIPK23, SnRK3.23, ATCIPK23, LKS1	CBL-interacting protein kinase 23	63.64	0
	3	UN004380	-4.46203	0.26571	1.59984	1	5.65502	0.002302	0.000157324	1		AT2G32900.1	ATZW10	centromere/kinetochore protein, putative (ZW10)	53.67	0
	3	UN003317	-4.55034	0.228973	0.519996	1	5.1034	0.040166	0.63207	1		AT1G45231.2	---	S-adenosyl-L-methionine-dependent methyltransferases superfamily protein	69.05	5e-105
	3	UN004002	-4.49757	0.245502	1.42034	1	4.33993	0.00246097	0.860376	1		AT4G15880.1	ESD4, ATESD4	Cysteine proteinases superfamily protein	26.8	1e-20
	3	UN022410	-2.63368	8.98582e-09	0.679885	1	2.30958	0.00828136	---	---		AT5G65730.1	XTH6	xyloglucan endotransglucosylase/hydrolase 6	80.23	4e-170
	3	UN024884	-2.69132	1	0.286265	1	2.88347	1	1.52966	0.035721		AT1G76480.2	---	unknown protein; FUNCTIONS IN: molecular_function unknown; INVOLVED IN: biological_process unknown; LOCATED IN: cellular_component unknown; BEST Arabidopsis thaliana protein match is: unknown protein (TAIR:AT1G20890.1).	50.59	3e-42
	3	UN002001	-4.88494	0.0971677	0.202273	1	3.7238	0.00164214	1.10013	1		AT5G62760.1	---	P-loop containing nucleoside triphosphate hydrolases superfamily protein	53.54	5e-73
	3	UN030097	-5.85391	8.67048e-06	-0.47247	1	5.79271	1.32721e-14	1.65315	1		AT1G78780.2	---	pathogenesis-related family protein	51.95	1e-86
	3	UN024607	-3.32125	0.0135675	-0.483661	1	3.39475	0.000321877	-0.126849	1		AT5G56550.1	OXS3, ATOXS3	oxidative stress 3	50.67	2e-14
	3	UN007639	-4.81883	0.120623	---	---	6.8554	2.51583e-08	0.371065	1		AT1G64430.1	---	Pentatricopeptide repeat (PPR) superfamily protein	71.52	7e-161
	3	UN029180	-4.26967	0.174775	-0.455046	1	3.26411	0.00552016	-0.805775	1		AT5G56550.1	OXS3, ATOXS3	oxidative stress 3	52.53	1e-19
	3	UN011710	-1.73798	0.0395523	-0.617719	1	2.15802	0.0803046	0.0778452	1		AT3G22970.1	---	Protein of unknown function (DUF506)	62.93	1e-110
	3	UN010248	-3.42763	1	-1.8397	1	5.51026	0.00720429	0.0274812	1		AT2G25970.1	---	KH domain-containing protein	81.48	3e-08
	3	UN017116	-2.46144	0.165706	-1.26538	1	3.80728	0.00274669	0.209661	1		AT1G25550.1	---	myb-like transcription factor family protein	47.06	1e-72
	3	UN015131	-3.10043	1	-0.578473	1	4.28234	0.0406197	-0.34685	1		---	---	---	---	---
	3	UN001695	-1.25042	1	-0.359729	1	1.80744	0.0397132	0.0157986	1		AT3G25690.1	CHUP1	Hydroxyproline-rich glycoprotein family protein	68.06	3e-110
	3	UN025494	-1.92739	0.241364	-0.463025	1	2.48802	0.0260449	-0.00396444	1		AT5G02160.1	---	unknown protein; FUNCTIONS IN: molecular_function unknown; INVOLVED IN: biological_process unknown; LOCATED IN: chloroplast thylakoid membrane; EXPRESSED IN: 23 plant structures; EXPRESSED DURING: 13 growth stages; Has 121 Blast hits to 121 proteins in 17 species: Archae - 0; Bacteria - 0; Metazoa - 0; Fungi - 0; Plants - 121; Viruses - 0; Other Eukaryotes - 0 (source: NCBI BLink).	82.28	1e-33
	3	UN020809	-2.93719	1	-0.496322	1	5.21987	0.0238862	-0.274896	1		AT3G18630.1	ATUNG, UNG	uracil dna glycosylase	75.61	9e-15
	3	UN005445	---	---	---	---	11.1219	4.40364e-69	-2.22132	1		---	---	---	---	---
	3	UN055622	-3.27884	1	-1.26065	1	5.71676	0.00286142	---	---		AT1G78780.2	---	pathogenesis-related family protein	55.42	4e-28
	3	UN006007	-1.09091	1	0.176035	1	5.87913	0.000572255	-2.06673	0.238242		AT5G08720.1	---	CONTAINS InterPro DOMAIN/s: Streptomyces cyclase/dehydrase (InterPro:IPR005031); BEST Arabidopsis thaliana protein match is: Polyketide cyclase / dehydrase and lipid transport protein (TAIR:AT4G01650.1); Has 30201 Blast hits to 17322 proteins in 780 species: Archae - 12; Bacteria - 1396; Metazoa - 17338; Fungi - 3422; Plants - 5037; Viruses - 0; Other Eukaryotes - 2996 (source: NCBI BLink).	71.91	4e-79
	3	UN010716	-1.10162	1	-0.376065	1	5.73908	0.00193809	-2.18553	1		AT2G24420.1	---	DNA repair ATPase-related	49.87	6e-138
	3	UN013781	-0.606718	1	-0.400006	1	2.53675	0.0165172	-0.686244	1		AT5G27860.1	---	unknown protein; FUNCTIONS IN: molecular_function unknown; INVOLVED IN: biological_process unknown; LOCATED IN: chloroplast; EXPRESSED IN: pollen tube; Has 35333 Blast hits to 34131 proteins in 2444 species: Archae - 798; Bacteria - 22429; Metazoa - 974; Fungi - 991; Plants - 531; Viruses - 0; Other Eukaryotes - 9610 (source: NCBI BLink).	71.88	2e-24
	3	UN015970	-0.256233	1	-0.362875	1	1.89447	0.0313044	-0.608395	1		AT3G10520.1	AHB2, GLB2, ARATH GLB2, NSHB2, ATGLB2, HB2	haemoglobin 2	75.71	5e-79
	3	UN012714	-1.25297	1	-1.41544	1	4.2805	0.0347392	-1.68982	0.376049		AT4G36700.1	---	RmlC-like cupins superfamily protein	40.5	4e-35
	3	UN031573	-1.15914	0.895122	-1.18925	0.64616	3.05895	0.0158948	-0.718566	1		AT1G08380.1	PSAO	photosystem I subunit O	77.88	2e-63
	3	UN001176	-0.314545	1	-0.209108	1	1.43639	0.0398509	-0.0218508	1		AT3G07400.1	---	lipase class 3 family protein	78.79	2e-09
	3	UN012782	-1.12543	1	-1.02479	1	5.02852	0.000300664	-0.529884	1		AT2G34930.1	---	disease resistance family protein / LRR family protein	39.51	1e-45
	3	UN004675	-1.19971	1	-0.191591	1	4.91794	0.0156533	0.322656	1		AT3G11080.1	AtRLP35, RLP35	receptor like protein 35	39.13	1e-121
	3	UN014741	-1.54817	1	-0.237419	1	5.32603	0.0173199	0.200063	1		AT1G30630.1	---	Coatomer epsilon subunit	83.33	2e-12
	3	UN001971	-1.03659	1	0.219857	1	2.80439	0.0422791	0.0193999	1		AT5G23720.1	PHS1	dual specificity protein phosphatase family protein	59.91	0
	3	UN008463	-3.18657	1	0.837198	1	6.98704	1.00608e-08	-0.373984	1		---	---	---	---	---
	3	UN008813	-2.25771	1	0.733221	1	5.22274	0.0267164	-0.32834	1		AT1G43245.1	---	SET domain-containing protein	31.78	5e-18
	3	UN011963	-1.83868	1	0.230233	1	7.11976	0.00184219	-1.10625	1		AT5G44450.1	---	methyltransferases	76.67	2e-10
	3	UN000641	-0.321748	1	-0.00728639	1	2.0708	0.00385503	-0.241602	1		AT3G03300.1	DCL2, ATDCL2	dicer-like 2	49.23	0
	3	UN001155	-0.331403	1	-0.0542695	1	1.2637	0.0235157	-0.111137	1		AT1G48410.2	2001-08-01	Stabilizer of iron transporter SufD / Polynucleotidyl transferase	75.66	0
	3	UN030987	-1.08318	1	-0.109267	1	5.14032	0.0402074	-0.243003	1		AT1G19260.1	---	TTF-type zinc finger protein with HAT dimerisation domain	47.83	4e-48
	3	UN005158	---	---	---	---	5.19122	0.0211451	-0.215097	1		AT5G67030.1	ABA1, LOS6, NPQ2, ATABA1, ZEP, IBS3, ATZEP	zeaxanthin epoxidase (ZEP) (ABA1)	63.5	5e-153
	3	UN056443	-0.807134	1	0.809409	1	6.77946	0.0158948	---	---		AT5G43580.1	---	Serine protease inhibitor, potato inhibitor I-type family protein	53.12	5e-18
	3	UN006574	-0.384643	1	1.50596	1	1.51201	0.0487906	0.0679006	1		AT4G39830.1	---	Cupredoxin superfamily protein	66.97	0
	3	UN013099	-0.555855	1	---	---	5.05202	0.0397132	0.444458	1		AT3G06880.2	---	Transducin/WD40 repeat-like superfamily protein	53.8	0
	3	UN021792	-0.0387745	1	1.19064	0.42938	1.28478	0.0133451	0.399433	1		AT4G33110.1	---	S-adenosyl-L-methionine-dependent methyltransferases superfamily protein	50.3	6e-117
	3	UN002160	-0.543573	1	0.725423	1	1.58733	0.0110772	-0.174587	1		AT1G06840.1	---	Leucine-rich repeat protein kinase family protein	67.55	0
	3	UN008575	-1.89827	1	2.09362	1	5.16243	0.0365519	-0.0667975	1		AT2G36200.2	---	P-loop containing nucleoside triphosphate hydrolases superfamily protein	47.47	2e-115
	3	UN005439	-2.13675	1	5.4868	0.0188687	5.55209	0.00382428	-1.47199	1		AT4G16570.1	ATPRMT7, PRMT7	protein arginine methyltransferase 7	58.05	0
	3	UN010447	-2.9978	1	5.11486	0.111512	5.09861	0.0372371	0.65315	1		AT2G26800.2	---	Aldolase superfamily protein	63.91	5e-173
	3	UN014517	-1.51059	0.040018	0.998713	1	1.90168	0.00487352	-0.600567	1		---	---	---	---	---
	3	UN015073	-2.55908	1	1.90878	1	2.87785	0.0299281	-0.155321	1		AT1G42430.1	---	unknown protein; BEST Arabidopsis thaliana protein match is: unknown protein (TAIR:AT3G55760.3); Has 186 Blast hits to 143 proteins in 47 species: Archae - 0; Bacteria - 23; Metazoa - 14; Fungi - 6; Plants - 87; Viruses - 0; Other Eukaryotes - 56 (source: NCBI BLink).	76.47	0
	3	UN004759	-2.16412	1	2.30857	1	3.03187	0.0120803	0.0532498	1		AT1G71810.1	---	Protein kinase superfamily protein	69.64	8e-93
	3	UN013184	---	---	3.22736	1	5.14737	0.0259203	-0.49898	1		AT2G32850.2	---	Protein kinase superfamily protein	36.67	6e-49
	3	UN022725	-3.26126	1	---	---	5.08165	0.0490909	-0.379273	1		AT3G07970.1	QRT2	Pectin lyase-like superfamily protein	57.18	4e-136
	3	UN035006	-5.22353	0.0264274	4.54716	0.625946	3.79986	0.737961	-0.870025	1		AT3G17668.1	ENA	DnaJ/Hsp40 cysteine-rich domain superfamily protein	59.8	4e-42
	3	UN011253	1.79298	0.855123	-0.352614	1	4.39229	0.000541762	-1.34089	0.91645		AT1G47530.1	---	MATE efflux family protein	58.61	0
	3	UN002588	2.68285	1	0.154898	1	5.26439	0.0217254	-0.922698	1		---	---	---	---	---
	3	UN006651	2.53992	1	0.222012	1	5.36207	0.014764	-0.234084	1		AT5G51710.1	KEA5, ATKEA5	K+ efflux antiporter 5	80.15	0
	3	UN014843	1.24924	1	0.169145	1	3.28613	0.00431556	-0.155642	1		AT4G33270.1	CDC20.1	Transducin family protein / WD-40 repeat family protein	66	0
	3	UN006797	0.581197	1	-0.0627995	1	2.04461	0.0178207	-0.18553	1		AT3G16560.1	---	Protein phosphatase 2C family protein	55.02	5e-51
	3	UN014797	1.25997	1	-0.231189	1	4.06259	2.05169e-06	-0.306975	1		AT4G33110.1	---	S-adenosyl-L-methionine-dependent methyltransferases superfamily protein	55.62	5e-140
	3	UN008047	1.89075	1	-0.606727	1	5.23511	0.0191606	-0.2516	1		---	---	---	---	---
	3	UN013639	2.85649	1	-1.266	1	6.84848	3.61545e-08	0.116448	1		AT3G50670.1	U1-70K, U1SNRNP	U1 small nuclear ribonucleoprotein-70K	65.71	1e-11
	3	UN016674	2.29116	1	-0.755508	1	5.04034	0.0362203	-0.161876	1		AT4G34330.1	---	Protein of unknown function (DUF677)	41.18	2e-06
	3	UN019249	1.39653	1	-0.277456	1	3.76541	0.0398802	0.402701	1		---	---	---	---	---
	3	UN005103	---	---	-0.33166	1	5.01471	0.0464505	-0.91059	1		AT5G43820.1	---	Pentatricopeptide repeat (PPR) superfamily protein	56.01	0
	3	UN005223	0.668768	1	-0.611508	1	5.2423	0.0228918	-1.02618	1		AT4G05460.1	---	RNI-like superfamily protein	47.78	2e-83
	3	UN005224	-0.126169	1	-0.269292	1	6.60733	2.73511e-13	-1.50799	1		AT4G36980.4	---	FUNCTIONS IN: molecular_function unknown; INVOLVED IN: biological_process unknown; EXPRESSED IN: 22 plant structures; EXPRESSED DURING: 13 growth stages; CONTAINS InterPro DOMAIN/s: Splicing factor, suppressor of white apricot (InterPro:IPR019147).	70.49	3e-115
	3	UN008765	-0.298452	1	-0.869877	1	6.40651	6.90145e-05	-0.195287	1		AT2G04865.1	---	Aminotransferase-like, plant mobile domain family protein	41.59	5e-17
	3	UN007389	0.171217	1	-0.231255	1	5.21563	0.0195133	-0.0687889	1		---	---	---	---	---
	3	UN012597	-0.0394347	1	-0.368904	1	5.07611	0.0377237	-0.525374	1		AT4G38650.1	---	Glycosyl hydrolase family 10 protein	59.5	0
	3	UN006044	-0.0548729	1	-0.86346	1	2.47788	0.0128801	-0.221096	1		AT4G33150.1	---	lysine-ketoglutarate reductase/saccharopine dehydrogenase bifunctional enzyme	69.92	0
	3	UN007522	-0.366584	1	-1.96318	1	6.02545	0.00165169	-0.665083	1		AT3G52120.1	---	SWAP (Suppressor-of-White-APricot)/surp domain-containing protein / D111/G-patch domain-containing protein	87.1	3e-12
	3	UN016059	0.651859	1	-1.17999	1	3.86066	6.03522e-14	-0.357213	1		AT4G35160.1	---	O-methyltransferase family protein	36.93	9e-74
	3	UN018949	0.335084	1	-1.00455	1	4.77287	0.0175534	-0.401217	1		AT1G01050.1	AtPPa1, PPa1	pyrophosphorylase 1	92.86	2e-13
	3	UN018575	0.680025	1	-0.978731	1	4.11217	0.0457525	-0.989061	1		AT3G18200.1	---	nodulin MtN21 /EamA-like transporter family protein	32.19	6e-54
	3	UN029835	0.141107	1	-0.450555	1	2.03272	0.00129875	-0.549267	1		AT3G61190.1	BAP1	BON association protein 1	39.16	1e-25
	3	UN014001	0.784584	1	-0.208475	1	5.08374	0.0395268	0.121219	1		AT5G56780.1	ATET2, ET2	effector of transcription2	36.94	1e-87
	3	UN010741	0.182418	1	0.0330146	1	1.51156	0.033605	0.0116639	1		AT1G30330.2	ARF6	auxin response factor 6	86.5	8e-96
	3	UN014613	0.537244	1	0.0994492	1	5.28011	0.0235157	0.19711	1		AT2G45570.1	CYP76C2	cytochrome P450, family 76, subfamily C, polypeptide 2	39.77	4e-65
	3	UN001230	0.432796	1	0.193663	1	2.10205	0.0211451	-0.00358182	1		AT3G14460.1	---	LRR and NB-ARC domains-containing disease resistance protein	35.12	5e-20
	3	UN002496	2.19742	1	0.408256	1	6.87125	0.00765721	0.112174	1		AT2G14820.1	NPY2	Phototropic-responsive NPH3 family protein	62.46	5e-151
	3	UN039188	1.52574	1	0.337213	1	5.1374	0.00559226	0.317179	1		AT2G45570.1	CYP76C2	cytochrome P450, family 76, subfamily C, polypeptide 2	58.33	2e-10
	3	UN004624	-0.484938	1	0.517468	1	5.82336	0.00102378	0.170383	1		AT2G25010.1	---	Aminotransferase-like, plant mobile domain family protein	29.47	2e-42
	3	UN027742	0.268327	1	0.527101	1	5.10439	2.55161e-21	0.166871	1		AT5G02020.1	SIS	Encodes a protein involved in salt tolerance, names SIS (Salt Induced Serine rich).	37.32	8e-10
	3	UN013933	0.602314	1	0.510241	1	4.28022	1.84623e-08	-0.501672	1		AT2G44450.1	BGLU15	beta glucosidase 15	57.77	0
	3	UN025121	0.321056	1	0.21469	1	2.15229	0.0417854	-0.198134	1		---	---	---	---	---
	3	UN005072	-0.0699861	1	0.456013	1	5.89349	0.000472496	-0.450518	1		AT1G05180.1	AXR1	NAD(P)-binding Rossmann-fold superfamily protein	75.05	0
	3	UN021336	0.00233297	1	0.0423597	1	1.70926	0.000304051	-0.181172	1		AT4G16260.1	---	Glycosyl hydrolase superfamily protein	61.08	3e-142
	3	UN042658	---	---	0.274061	1	5.85048	0.00124034	-0.650401	1		AT4G17085.1	---	Putative membrane lipoprotein	67.92	8e-23
	3	UN002560	0.054439	1	0.634439	1	1.83385	0.0232691	-0.787394	1		AT2G42490.1	---	Copper amine oxidase family protein	83.65	0
	3	UN008485	0.0768452	1	0.670174	1	1.89413	0.0140171	-0.574194	1		AT2G39650.1	---	Protein of unknown function (DUF506)	55.6	3e-93
	3	UN011006	0.875909	1	3.06705	1	6.36004	1.68704e-05	-1.89998	0.233978		AT1G20925.1	---	Auxin efflux carrier family protein	53.86	2e-138
	3	UN015172	-0.104222	1	1.38224	1	2.65976	0.0476175	-0.809364	1		AT3G14840.2	---	Leucine-rich repeat transmembrane protein kinase	63.83	0
	3	UN008426	-0.823204	1	1.47631	1	5.25599	0.0168896	-2.08704	1		AT2G01460.1	---	P-loop containing nucleoside triphosphate hydrolases superfamily protein	77.98	0
	3	UN029053	-0.421677	1	0.461501	1	2.92391	1.09088e-13	-0.66752	1		AT5G39160.1	---	RmlC-like cupins superfamily protein	64.49	5e-96
	3	UN002641	-0.224072	1	0.878452	1	4.74706	0.0397132	-0.700147	1		AT3G24255.1	---	RNA-directed DNA polymerase (reverse transcriptase)-related family protein	33.33	4e-15
	3	UN007691	-0.363892	1	0.842921	1	5.25809	0.0117619	-0.901867	1		---	---	---	---	---
	3	UN004711	-0.288052	1	0.582381	1	2.33891	9.20881e-08	-0.257521	1		AT4G29130.1	ATHXK1, GIN2, HXK1	hexokinase 1	72.86	0
	3	UN056536	-0.545675	1	1.42189	1	7.00125	0.00544308	-0.50784	1		AT5G43580.1	---	Serine protease inhibitor, potato inhibitor I-type family protein	53.12	5e-18
	3	UN010461	0.137536	1	0.778153	1	1.62382	0.0173478	0.0859128	1		AT1G21240.1	WAK3	wall associated kinase 3	43.47	5e-161
	3	UN004853	0.460459	1	2.59217	1	7.25929	2.09621e-10	1.65674	1		AT1G79730.1	ELF7	hydroxyproline-rich glycoprotein family protein	65.83	8e-149
	3	UN020718	-0.0816508	1	0.755914	1	1.77227	0.0174184	0.487838	1		AT4G19110.2	---	Protein kinase superfamily protein	39.62	4e-27
	3	UN004266	1.85376	1	3.94493	1	5.76493	0.000953649	-2.00142	1		AT1G68920.1	---	basic helix-loop-helix (bHLH) DNA-binding superfamily protein	39.06	4e-87
	3	UN026406	0.943821	0.221121	1.26542	1	2.29327	0.014764	-0.600567	1		AT5G02230.1	---	Haloacid dehalogenase-like hydrolase (HAD) superfamily protein	65.38	2e-128
	3	UN048675	2.74998	1	4.74967	1	7.35588	1.66704e-05	-1.67469	1		AT5G39110.1	---	RmlC-like cupins superfamily protein	73.68	3e-86
	3	UN004138	2.45506	1	1.34754	1	6.01605	0.000171106	-0.291357	1		AT3G20780.1	ATTOP6B, BIN3, HYP6, RHL3, TOP6B	topoisomerase 6 subunit B	81.37	0
	3	UN007439	0.791413	0.814025	0.693167	1	2.35056	8.18937e-05	-0.286157	1		AT5G10530.1	---	Concanavalin A-like lectin protein kinase family protein	50	0
	3	UN027588	1.34014	0.326795	0.747085	1	3.49848	0.0133058	0.44349	1		AT1G80920.1	J8	Chaperone DnaJ-domain superfamily protein	60.55	4e-43
	3	UN004050	0.52956	1	0.514336	1	2.55545	0.0132104	0.382883	1		AT3G29390.1	RIK	RS2-interacting KH protein	53.3	6e-68
	3	UN055260	1.43872	1	1.60819	1	5.32871	0.0189175	0.399433	1		AT5G39110.1	---	RmlC-like cupins superfamily protein	69.78	2e-65
	3	UN024261	4.11145	0.363752	3.63677	1	8.0395	5.40787e-07	1.99896	0.345059		---	---	---	---	---
	3	UN004360	1.06778	0.636139	0.802187	1	1.76803	0.00159507	0.086814	1		AT1G79570.1	---	Protein kinase superfamily protein with octicosapeptide/Phox/Bem1p domain	46.07	4e-75
	3	UN028631	3.25707	1	---	---	7.38294	2.46421e-11	0.213045	1		AT2G29960.1	CYP5, ATCYP5, CYP19-4	cyclophilin 5	87.78	2e-107
	3	UN012101	0.774136	0.697989	1.14443	1	1.78837	0.0128775	0.18151	1		AT5G65140.1	TPPJ	Haloacid dehalogenase-like hydrolase (HAD) superfamily protein	67.11	0
	3	UN013302	1.07666	1	2.26165	0.761424	3.31008	2.75752e-10	0.121428	1		AT3G26430.1	---	GDSL-like Lipase/Acylhydrolase superfamily protein	53.78	4e-150
	3	UN027302	0.728568	1	1.25385	1	2.50106	1.25205e-05	0.242675	1		AT3G26430.1	---	GDSL-like Lipase/Acylhydrolase superfamily protein	60.07	8e-129
	3	UN057463	2.42081	1	3.72211	1	7.30404	0.000767085	0.071773	1		AT5G43580.1	---	Serine protease inhibitor, potato inhibitor I-type family protein	52.31	3e-16
	3	UN006079	5.72973	0.000568541	-6.87111	3.18125e-07	7.21103	3.19084e-10	-1.05571	0.960097		AT1G32900.1	---	UDP-Glycosyltransferase superfamily protein	71.62	0
	3	UN007452	5.28002	0.0106012	-6.79142	0.0146238	5.08246	0.0313044	-0.553878	1		AT4G14350.1	---	AGC (cAMP-dependent, cGMP-dependent and protein kinase C) kinase family protein	75.82	0
	3	UN016955	5.98402	0.00013479	-5.93199	0.000780097	5.02225	0.0597996	0.102486	1		---	---	---	---	---
	3	UN002674	0.436543	1	-1.53146	1	2.84455	0.0173712	-0.550982	1		AT2G01460.1	---	P-loop containing nucleoside triphosphate hydrolases superfamily protein	75.03	0
	3	UN009459	1.66111	1	-4.55343	0.388955	6.92151	8.58468e-09	-0.435202	1		AT4G32330.1	---	TPX2 (targeting protein for Xklp2) protein family	39.29	3e-67
	3	UN003671	1.31288	1	-1.93872	1	5.21508	0.0301899	-1.34411	0.383055		AT1G63800.1	UBC5	ubiquitin-conjugating enzyme 5	84.85	5e-18
	3	UN012530	1.61167	1	-2.52368	1	5.42109	0.0112504	-1.67469	1		AT1G76900.1	AtTLP1, TLP1	tubby like protein 1	84.38	7e-11
	3	UN010813	2.17788	1	-2.10927	1	6.40652	1.18704e-05	0.00111543	1		AT2G20130.1	LCV1	like COV 1	63.33	5e-07
	3	UN025080	0.491395	1	-0.45291	1	2.16625	0.0278634	-0.00253972	1		---	---	---	---	---
	3	UN016070	-0.0687577	1	-1.60928	1	2.87503	0.0117619	0.14385	1		AT1G68090.1	ANNAT5, ANN5	annexin 5	44.07	4e-30
	3	UN027011	-0.242118	1	-3.38088	1	5.40937	0.0103049	1.02845	1		---	---	---	---	---
	3	UN003714	0.580883	1	-4.42673	1	9.38439	7.8869e-36	3.21605	1		AT3G47340.1	ASN1, DIN6, AT-ASN1	glutamine-dependent asparagine synthase 1	83.33	0
	3	UN022007	-0.271668	1	-1.93826	1	5.09799	0.777407	2.23038	0.00574397		AT4G38180.1	FRS5	FAR1-related sequence 5	32.52	2e-34
	3	UN013014	-0.159395	1	-0.843904	1	2.89265	4.40974e-07	0.652942	1		AT3G26330.1	CYP71B37	cytochrome P450, family 71, subfamily B, polypeptide 37	48.03	3e-153
	3	UN025338	0.272177	1	-1.45166	1	5.03031	0.0439263	1.39576	0.230788		AT3G17365.2	---	S-adenosyl-L-methionine-dependent methyltransferases superfamily protein	50.19	7e-82
	3	UN033335	0.329323	1	-1.46899	1	6.99339	0.00657488	1.91487	1		AT5G66020.1	IBS2, ATSAC1B, ATSAC6, SACIB	Phosphoinositide phosphatase family protein	73.91	2e-18
	3	UN004408	-0.969739	1	-1.94656	0.160234	2.0032	0.00628539	0.408444	1		AT1G02640.1	BXL2, ATBXL2	beta-xylosidase 2	69.24	0
	3	UN008837	-2.12835	0.0361797	-3.94385	0.539337	3.27427	0.458525	0.552273	1		AT2G39130.1	---	Transmembrane amino acid transporter family protein	65.53	0
	3	UN002764	-2.83719	1	-3.63283	1	5.72352	0.00193809	-0.21652	1		AT5G49290.1	ATRLP56, RLP56	receptor like protein 56	33.38	5e-75
	3	UN005150	-2.11991	1	-1.81758	1	4.55323	0.0005692	-0.0137572	1		AT3G47340.1	ASN1, DIN6, AT-ASN1	glutamine-dependent asparagine synthase 1	83.47	0
	3	UN003719	-1.88146	1	-2.44789	1	5.0922	0.000948116	-0.172466	1		---	---	---	---	---
	3	UN021156	-1.65277	1	-1.83611	1	3.95516	0.0011492	-0.113904	1		AT5G65420.3	CYCD4;1	CYCLIN D4;1	45.45	4e-34
	3	UN006233	-0.621232	1	-1.20557	1	2.14591	0.0488322	0.221246	1		AT4G38470.1	---	ACT-like protein tyrosine kinase family protein	70.94	0
	3	UN000215	-0.44067	1	-0.759702	1	1.82765	0.011713	0.317742	1		AT4G17610.1	---	tRNA/rRNA methyltransferase (SpoU) family protein	49.81	0
	3	UN000803	-0.13714	1	-0.404391	1	1.24403	0.0490909	0.16361	1		AT5G54440.1	CLUB, AtTRS130	CLUB	71.96	0
	3	UN006289	-0.409324	1	-1.04749	1	2.74735	0.0365519	0.485109	1		AT4G33950.1	OST1, SNRK2-6, SRK2E, SNRK2.6, P44, ATOST1	Protein kinase superfamily protein	94.16	0
	3	UN000547	-0.463747	1	-0.617968	1	2.1781	0.000114931	0.131241	1		AT1G73960.1	TAF2	TBP-associated factor 2	62.6	1e-92
	3	UN001791	-0.286702	1	-0.391886	1	1.22445	0.0468151	0.0999736	1		AT3G14470.1	---	NB-ARC domain-containing disease resistance protein	36.12	4e-135
	3	UN021381	-0.618706	1	-0.9346	1	2.90248	8.13198e-07	0.225599	1		AT3G12500.1	ATHCHIB, PR3, PR-3, CHI-B, B-CHI, HCHIB	basic chitinase	67.66	2e-122
	3	UN024568	-0.879361	1	-1.43543	1	3.73648	1.30266e-22	0.000934219	1		AT3G04720.1	PR4, HEL, PR-4	pathogenesis-related 4	77.5	8e-67
	3	UN007206	-2.08353	1	-7.63701	7.38214e-13	6.05339	0.000258397	-0.775879	1		AT1G78600.2	LZF1	light-regulated zinc finger protein 1	45.9	4e-73
	3	UN013127	0.108695	1	-5.49331	0.0145512	3.983	0.458214	-0.63736	1		AT4G31810.1	---	ATP-dependent caseinolytic (Clp) protease/crotonase family protein	66.18	0
	3	UN015041	-0.471822	1	-6.35789	1.69995e-05	5.96929	0.000223409	-1.35661	0.448854		AT1G53580.1	GLX2-3, ETHE1, GLY3	glyoxalase II 3	78.43	8e-142
	3	UN002218	-1.43118	1	-3.38622	1	5.75532	0.00130863	-2.79034	1		AT1G05790.1	---	lipase class 3 family protein	46.42	0
	3	UN003932	-0.379016	1	-2.45498	1	3.13872	1	-1.50821	0.00209583		AT5G65180.1	---	ENTH/VHS family protein	50.83	1e-110
	3	UN008573	---	---	-2.39508	1	2.6684	1	-1.27294	0.00776065		AT1G80050.1	APT2, ATAPT2, PHT1.1	adenine phosphoribosyl transferase 2	72.73	9e-13
	3	UN008915	-0.742769	0.267003	-1.59497	1	1.63896	0.0226075	-0.547391	1		AT3G61040.1	CYP76C7	cytochrome P450, family 76, subfamily C, polypeptide 7	38.28	3e-86
	3	UN052663	-0.696314	1	-1.54533	0.0105912	1.36724	0.0248635	-0.696166	1		AT4G35090.1	CAT2	catalase 2	86	2e-92
	3	UN052644	-0.450543	1	-2.23427	0.000435225	1.64496	0.265205	---	---		AT4G35090.1	CAT2	catalase 2	82.83	1e-56
	3	UN008862	-3.94547	0.000134796	-2.36109	0.664678	3.40952	1	2.61341	1		AT1G77380.1	AAP3, ATAAP3	amino acid permease 3	74.79	0
	3	UN003835	-1.05924	0.684964	-0.843048	1	1.58039	0.0175193	0.71681	1		AT5G24010.1	---	Protein kinase superfamily protein	54.11	0
	3	UN015510	-1.52513	0.714631	-0.950654	1	2.1278	0.0304654	0.475808	1		AT5G56890.1	---	Protein kinase superfamily protein	62.47	1e-173
	3	UN017028	-7.25162	2.08737e-10	-6.21922	7.44026e-05	7.67807	5.67244e-15	1.93774	0.00883614		---	---	---	---	---
	3	UN004546	-1.03158	0.908265	-0.840736	1	1.60166	0.0311508	1.17477	1		AT4G27220.1	---	NB-ARC domain-containing disease resistance protein	38.23	1e-97
	3	UN025638	-0.646772	1	-1.05603	1	1.45899	0.0191606	1.07177	1		AT4G19112.1	CPuORF25	conserved peptide upstream open reading frame 25	60.98	8e-12
	3	UN034669	-1.24993	1	-2.54741	1	3.70232	1	1.81441	0.0291509		AT1G19260.1	---	TTF-type zinc finger protein with HAT dimerisation domain	37.42	2e-25
	3	UN020105	---	---	-0.170545	1	5.831	0.001134	0.483408	1		AT1G75780.1	TUB1	tubulin beta-1 chain	96.38	0
	3	UN016593	-2.55034	1	-0.795648	1	5.18476	0.0261928	1.36497	1		AT4G33270.1	CDC20.1	Transducin family protein / WD-40 repeat family protein	59.54	1e-168
	3	UN001189	-1.19676	1	-0.394768	1	2.70443	0.000836943	1.06424	1		AT4G34830.1	MRL1	Pentatricopeptide repeat (PPR) superfamily protein	57.84	0
	3	UN020967	-1.93012	1	-0.870913	1	5.1924	0.027036	1.75874	1		AT1G30970.1	SUF4	zinc finger (C2H2 type) family protein	84	2e-09
	3	UN037372	-1.81738	1	-0.89701	1	5.98913	0.000511663	1.80836	1		AT5G66020.1	IBS2, ATSAC1B, ATSAC6, SACIB	Phosphoinositide phosphatase family protein	79.17	8e-36
	3	UN000242	-0.69784	1	-0.690812	1	2.03557	0.00861616	0.687888	1		AT2G36810.1	---	ARM repeat superfamily protein	68.12	0
	3	UN001605	-0.413837	1	-0.500118	1	1.52025	0.0358988	0.365234	1		AT3G59780.1	---	Rhodanese/Cell cycle control phosphatase superfamily protein	45.49	0
	3	UN000465	-0.361174	1	-0.281979	1	1.59444	0.0173478	0.263754	1		AT1G77600.3	---	ARM repeat superfamily protein	43.25	0
	3	UN000312	-0.347048	1	-0.152347	1	1.35648	0.0452763	0.347379	1		AT4G33200.1	XI-I, ATXI-I, XI-15	myosin, putative	71.87	0
	3	UN009931	-0.483053	1	-0.225807	1	2.52189	0.000395087	0.829554	1		AT2G22720.2	---	SPT2 chromatin protein	51.79	3e-27
	3	UN000121	-0.3241	1	-0.493166	1	2.50133	0.0330762	0.69325	1		AT3G50380.1	---	Protein of unknown function (DUF1162)	46.37	0
	3	UN000627	-0.179938	1	-0.240148	1	1.5059	0.0319799	0.388006	1		AT1G74770.1	---	zinc ion binding	46.54	0
	3	UN049421	-0.208681	1	-0.460053	1	2.9645	2.26721e-05	0.842922	1		AT5G39160.1	---	RmlC-like cupins superfamily protein	67.97	2e-57
	3	UN001673	---	---	---	---	5.13948	0.0254559	1.2257	1		AT4G27220.1	---	NB-ARC domain-containing disease resistance protein	42.7	1e-26
	3	UN008405	-1.74995	0.014362	-1.37573	0.981958	1.90805	0.000167002	-1.22848	1		AT3G51860.1	CAX3, ATHCX1, CAX1-LIKE, ATCAX3	cation exchanger 3	72.9	0
	3	UN004388	-4.08803	0.544116	-3.27919	1	5.13546	0.040166	-1.71499	1		AT3G04160.2	---	unknown protein; FUNCTIONS IN: molecular_function unknown; INVOLVED IN: biological_process unknown; EXPRESSED IN: 7 plant structures; EXPRESSED DURING: F mature embryo stage, petal differentiation and expansion stage, E expanded cotyledon stage, D bilateral stage.	42.64	8e-107
	3	UN013480	-2.50119	0.000204545	-1.52297	1	2.58261	0.002743	-0.881197	1		AT2G03500.1	---	Homeodomain-like superfamily protein	42.07	5e-61
	3	UN003976	-6.14798	0.000223236	-5.61115	0.00778906	5.52457	0.00642232	-2.11633	1		AT3G50950.2	ZAR1	HOPZ-ACTIVATED RESISTANCE 1	36.69	1e-82
	3	UN029435	-4.69029	0.484177	-4.66196	1	5.12464	0.0347392	-1.49233	1		AT1G24020.1	MLP423	MLP-like protein 423	33.87	3e-12
	3	UN003970	-2.266	1	-1.04793	1	2.78844	1	-2.07864	0.0365551		AT5G39785.2	---	Protein of unknown function (DUF1666)	52.63	4e-23
	3	UN033345	-1.28533	0.632075	-1.28155	1	2.73716	1.2991e-05	-2.28145	0.0557716		AT3G54420.1	ATEP3, ATCHITIV, CHIV, EP3	homolog of carrot EP3-3 chitinase	52.78	3e-47
	4	UN017789	-0.675875	1	-2.38739	1	---	---	1.75773	0.0480967		AT3G48160.2	DEL1, E2L3, E2FE	DP-E2F-like 1	49.17	5e-57
	4	UN004842	-6.66834	2.41219e-06	---	---	---	---	0.734186	1		AT1G79730.1	ELF7	hydroxyproline-rich glycoprotein family protein	65.83	8e-149
	4	UN007333	-1.38946	0.0182332	0.322633	1	-1.51392	0.0246231	---	---		AT5G51160.1	---	Ankyrin repeat family protein	29.82	4e-38
	4	UN034950	-5.81192	0.00461837	0.479478	1	1.31961	1	---	---		---	---	---	---	---
	4	UN012526	-1.7327	0.0334641	-0.0835524	1	1.44145	0.282312	-1.40355	0.960116		AT5G54130.2	---	Calcium-binding endonuclease/exonuclease/phosphatase family	73.63	0
	4	UN014685	-1.30565	0.0195072	-0.250317	1	0.78778	0.437382	-0.729879	1		AT1G20020.1	ATLFNR2, FNR2	ferredoxin-NADP(+)-oxidoreductase 2	80.91	0
	4	UN016385	-2.11454	0.0264365	0.644962	1	1.05576	0.210542	-0.790339	1		AT4G27450.1	---	Aluminium induced protein with YGL and LRDR motifs	70.52	5e-134
	4	UN016386	-2.60706	0.0286028	0.717757	1	1.27041	0.0565591	-1.11227	1		AT4G27450.1	---	Aluminium induced protein with YGL and LRDR motifs	70.52	5e-134
	4	UN038120	-2.60472	6.1695e-06	0.370833	1	1.51201	0.124021	-1.2383	1		AT4G10270.1	---	Wound-responsive family protein	59.52	5e-10
	4	UN039610	-3.27734	0.0395343	0.472718	1	1.31326	0.638193	-1.2312	1		AT1G19530.1	---	unknown protein; FUNCTIONS IN: molecular_function unknown; INVOLVED IN: N-terminal protein myristoylation, anaerobic respiration; LOCATED IN: cellular_component unknown; EXPRESSED IN: leaf apex, inflorescence meristem, hypocotyl, root, flower; EXPRESSED DURING: petal differentiation and expansion stage; Has 47 Blast hits to 47 proteins in 13 species: Archae - 0; Bacteria - 0; Metazoa - 0; Fungi -…	36.09	5e-12
	4	UN039390	-3.18003	0.000149762	0.519268	1	1.68008	0.246598	---	---		---	---	---	---	---
	4	UN040233	-5.62709	0.00380055	0.909844	1	---	---	-1.90187	1		---	---	---	---	---
	4	UN007168	-1.09956	0.0415448	-0.451698	1	0.989923	1	-0.102516	1		AT1G78600.2	LZF1	light-regulated zinc finger protein 1	45.9	4e-73
	4	UN028582	-6.94652	1.16841e-07	-0.535407	1	---	---	0.496158	1		AT2G29960.1	CYP5, ATCYP5, CYP19-4	cyclophilin 5	87.78	2e-107
	4	UN027543	-1.12329	0.00929989	-0.0422833	1	0.81784	0.627092	-0.012563	1		AT2G15890.1	MEE14	maternal effect embryo arrest 14	58.18	2e-60
	4	UN008625	-5.27437	0.0216463	-0.452945	1	3.15236	1	-1.00198	1		AT5G51300.1	---	splicing factor-related	45.33	3e-112
	4	UN029639	-2.4602	0.019249	-0.391241	1	1.58015	0.753933	-0.221511	1		AT1G11530.1	ATCXXS1, CXXS1	C-terminal cysteine residue is changed to a serine 1	63.39	1e-44
	4	UN044225	-5.06006	0.0483103	---	---	---	---	-1.62545	1		AT4G26880.1	---	Stigma-specific Stig1 family protein	49.57	6e-31
	4	UN003538	-5.54931	0.00578468	4.49572	0.690648	-0.122935	1	-1.89974	1		AT2G42320.1	---	nucleolar protein gar2-related	61.35	0
	4	UN024417	-1.85154	7.90553e-05	0.607693	1	0.0180155	1	---	---		AT1G10140.1	---	Uncharacterised conserved protein UCP031279	35.06	1e-09
	4	UN009116	-1.94411	1	1.92669	1	-2.91739	1	-1.70343	0.0367353		AT4G18390.1	TCP2	TEOSINTE BRANCHED 1, cycloidea and PCF transcription factor 2	38.64	9e-33
	4	UN015881	-6.18726	7.08289e-05	6.22749	0.000209908	---	---	-0.291049	1		AT3G62700.1	ATMRP10, MRP10, ABCC14	multidrug resistance-associated protein 10	82.34	0
	4	UN022680	-1.30975	0.00278743	0.80168	0.942568	-0.911859	0.603636	-0.534171	1		AT5G58070.1	ATTIL, TIL	temperature-induced lipocalin	70.97	6e-102
	4	UN006949	-1.37612	0.0040024	0.610916	1	-0.294623	1	-0.234335	1		AT2G03430.1	---	Ankyrin repeat family protein	30.5	6e-17
	4	UN030437	-2.21848	5.32119e-06	1.07462	0.158339	-0.801114	1	-0.584939	1		AT3G02550.1	LBD41	LOB domain-containing protein 41	51.57	2e-66
	4	UN020343	-1.81577	0.0281328	0.900029	1	-0.860651	1	-0.131421	1		AT3G22060.1	---	Receptor-like protein kinase-related family protein	41.9	2e-45
	4	UN030452	-1.46344	0.00465928	1.00919	1	-0.863008	0.194298	0.0609284	1		AT2G45180.1	---	Bifunctional inhibitor/lipid-transfer protein/seed storage 2S albumin superfamily protein	75.95	5e-39
	4	UN008466	-0.787041	1	-3.82501	0.0309729	1.10937	1	0.175973	1		AT5G41800.1	---	Transmembrane amino acid transporter family protein	75.06	0
	4	UN011496	-1.4608	0.960841	-6.28843	6.03804e-05	1.73413	1	0.558302	1		AT2G17787.1	---	unknown protein; BEST Arabidopsis thaliana protein match is: unknown protein (TAIR:AT4G35940.2); Has 35333 Blast hits to 34131 proteins in 2444 species: Archae - 798; Bacteria - 22429; Metazoa - 974; Fungi - 991; Plants - 531; Viruses - 0; Other Eukaryotes - 9610 (source: NCBI BLink).	35.06	7e-07
	4	UN004858	-2.87006	1	-5.42099	0.0249278	2.82313	1	0.317148	1		AT1G14180.1	---	RING/U-box superfamily protein	33.91	4e-41
	4	UN015004	-2.55035	0.264318	-5.48326	0.0213608	1.76803	1	-0.3153	1		AT4G32440.2	---	Plant Tudor-like RNA-binding protein	36.41	7e-62
	4	UN011971	-1.03316	1	-5.22537	0.0424807	0.992502	1	1.85548	1		AT3G01680.1	---	CONTAINS InterPro DOMAIN/s: Mediator complex subunit Med28 (InterPro:IPR021640); BEST Arabidopsis thaliana protein match is: unknown protein (TAIR:AT3G01670.1); Has 122 Blast hits to 112 proteins in 13 species: Archae - 0; Bacteria - 0; Metazoa - 0; Fungi - 0; Plants - 122; Viruses - 0; Other Eukaryotes - 0 (source: NCBI BLink).	33.39	1e-91
	4	UN037170	-0.640145	1	-3.82396	1	1.4339	1	1.61894	0.00932065		---	---	---	---	---
	4	UN002109	-0.413936	1	-6.62938	8.40859e-07	-0.0187061	1	2.66182	1		AT1G17110.2	UBP15	ubiquitin-specific protease 15	43.91	0
	4	UN005000	-0.600648	1	-9.14469	9.50523e-31	-1.44914	1	3.71913	1		AT2G37040.1	PAL1, ATPAL1	PHE ammonia lyase 1	83.41	0
	4	UN003314	-1.65223	1	-5.25963	0.0355374	-0.0148138	1	1.39834	1		AT1G05200.1	ATGLR3.4, GLR3.4, GLUR3	glutamate receptor 3.4	66.8	0
	4	UN033667	-2.09672	1	-4.60112	1	0.418672	1	2.03306	0.0471537		AT2G47000.1	MDR4, PGP4, ABCB4, ATPGP4	ATP binding cassette subfamily B4	66.8	8e-96
	4	UN047027	-0.717505	0.348069	-1.52239	0.00360154	-0.133592	1	0.914866	1		AT5G60390.1	---	GTP binding Elongation factor Tu family protein	99.36	1e-113
	4	UN048181	-1.14374	0.454506	-2.35523	3.90037e-06	-0.115382	1	---	---		AT3G13460.1	ECT2	evolutionarily conserved C-terminal region 2	52.46	2e-23
	4	UN005409	0.0954604	1	-5.61146	0.00682316	0.363917	1	-0.217667	1		AT4G16570.1	ATPRMT7, PRMT7	protein arginine methyltransferase 7	58.37	0
	4	UN023985	-0.463627	1	-5.76004	0.00301986	-1.65385	0.874267	-0.922495	1		AT3G60670.1	---	PLATZ transcription factor family protein	53.49	4e-67
	4	UN009833	-1.97721	1	-6.63259	1.49984e-06	-1.66359	0.723966	-0.102063	1		AT3G50120.1	---	Plant protein of unknown function (DUF247)	35.46	1e-79
	4	UN039160	-1.38607	1	-3.53003	0.0303952	-1.13486	1	-0.375302	1		AT3G60750.1	---	Transketolase	83.95	1e-44
	4	UN001662	-0.913044	1	-6.4118	1.57324e-05	0.0267985	1	-0.45105	1		AT4G15080.1	---	DHHC-type zinc finger family protein	38.41	8e-21
	4	UN004594	-1.13252	1	-7.00213	6.85713e-08	0.309348	1	-0.643233	1		AT1G15130.1	---	Endosomal targeting BRO1-like domain-containing protein	71.13	0
	4	UN005248	-1.45381	0.697989	-5.53344	0.0127751	0.323283	1	-0.784954	0.968218		AT3G18520.2	HDA15, ATHDA15	histone deacetylase 15	65.04	0
	4	UN006538	-1.74208	1	-5.31433	0.0470859	-0.0595227	1	0.235076	1		AT3G16230.2	---	Predicted eukaryotic LigT	51.74	6e-125
	4	UN009410	-0.9219	1	-5.25293	0.0343008	-0.536846	1	0.862864	1		AT3G46100.1	ATHRS1, HRS1	Histidyl-tRNA synthetase 1	74.05	0
	4	UN011627	-0.374537	1	-6.66663	1.21513e-06	-0.470666	1	0.857888	1		AT1G59750.1	ARF1	auxin response factor 1	38.07	2e-22
	4	UN013069	-1.98381	0.000933932	-0.742916	1	1.76469	0.136292	1.05601	1		AT1G11580.1	ATPMEPCRA, PMEPCRA	methylesterase PCR A	43.67	7e-101
	4	UN012224	-1.45398	0.000248924	-0.901406	1	1.13691	0.0936323	0.442525	1		AT1G55810.1	UKL3	uridine kinase-like 3	85.14	0
	4	UN017233	-1.45868	1	-0.755508	1	---	---	2.14659	0.0479116		AT2G47980.1	SCC3, ATSCC3	sister-chromatid cohesion protein 3	67.5	1e-11
	4	UN041895	-2.21399	0.802189	-0.611064	1	1.0896	1	2.43215	0.00723188		AT5G59720.1	HSP18.2	heat shock protein 18.2	70.15	7e-53
	4	UN048699	-2.24993	1	-0.938265	1	0.99445	1	2.66039	0.00065873		AT5G63380.1	---	AMP-dependent synthetase and ligase family protein	63.86	9e-69
	4	UN019496	-1.73468	0.00527907	-1.48001	1	0.941008	0.736185	---	---		AT1G15380.1	---	Lactoylglutathione lyase / glyoxalase I family protein	63.43	5e-57
	4	UN025207	-1.99944	0.00584905	-0.540085	1	0.47336	1	---	---		AT1G67740.1	PSBY, YCF32	photosystem II BY	63.7	1e-30
	4	UN017835	-2.07056	0.00107369	-2.0846	1	-0.708209	1	-0.302967	1		AT3G19990.1	---	unknown protein; INVOLVED IN: biological_process unknown; LOCATED IN: chloroplast stroma, chloroplast; EXPRESSED IN: 23 plant structures; EXPRESSED DURING: 13 growth stages; Has 118 Blast hits to 118 proteins in 41 species: Archae - 0; Bacteria - 42; Metazoa - 0; Fungi - 0; Plants - 56; Viruses - 0; Other Eukaryotes - 20 (source: NCBI BLink).	71.19	0
	4	UN010530	-2.57349	3.84602e-05	-2.31974	0.000486729	-1.35467	1	-0.0235052	1		AT5G03650.1	SBE2.2	starch branching enzyme 2.2	60.97	0
	4	UN020182	-3.04174	0.00383371	-2.95031	0.993691	-1.86049	1	-0.310772	1		AT1G68290.1	ENDO 2	endonuclease 2	69.86	6e-152
	4	UN003240	-2.34341	0.00715465	-2.02794	1	0.120697	1	-0.133306	1		AT1G01060.1	LHY, LHY1	Homeodomain-like superfamily protein	60	3e-43
	4	UN005018	-6.75557	3.72701e-07	-4.69361	0.267504	-0.182971	1	-1.06016	1		AT3G57890.2	---	Tubulin binding cofactor C domain-containing protein	61.56	0
	4	UN012662	-2.92311	0.00479586	-2.15529	0.662342	-0.0720581	1	-0.597289	1		AT5G48930.1	HCT	hydroxycinnamoyl-CoA shikimate/quinate hydroxycinnamoyl transferase	44.72	1e-132
	4	UN002308	-2.14174	0.00527004	-2.41552	1	-0.20495	1	-0.301006	1		AT1G78240.1	TSD2, QUA2, OSU1	S-adenosyl-L-methionine-dependent methyltransferases superfamily protein	65.19	0
	4	UN015315	-4.85927	1	-5.38612	0.0226211	0.0307935	1	-0.320901	1		AT3G59630.1	---	diphthamide synthesis DPH2 family protein	55.79	0
	4	UN024518	-5.04364	0.0620996	-5.39242	0.0265032	-0.918665	1	0.153813	1		AT5G57280.1	---	S-adenosyl-L-methionine-dependent methyltransferases superfamily protein	70.07	5e-131
	4	UN033301	-6.20962	0.105667	-6.41273	0.0181432	-1.29625	1	-0.100589	1		AT5G03650.1	SBE2.2	starch branching enzyme 2.2	53.76	3e-28
	4	UN007258	-1.37335	0.0447396	-0.572692	1	-0.429036	1	0.269928	1		AT1G19940.1	AtGH9B5, GH9B5	glycosyl hydrolase 9B5	69.17	0
	4	UN003521	-3.49219	0.0202921	-1.40007	1	-0.84274	1	0.412452	1		AT3G25500.1	AFH1, FH1, AHF1, ATFH1	formin homology 1	40.86	1e-07
	4	UN007526	-1.56545	0.0192049	-0.494917	1	-0.366049	1	0.199306	1		AT1G68570.1	---	Major facilitator superfamily protein	69.62	0
	4	UN005437	-5.04352	2.34037e-09	-2.26083	1	-2.00844	0.756669	0.0891763	1		AT5G47580.1	---	unknown protein; BEST Arabidopsis thaliana protein match is: unknown protein (TAIR:AT4G17250.1); Has 1807 Blast hits to 1807 proteins in 277 species: Archae - 0; Bacteria - 0; Metazoa - 736; Fungi - 347; Plants - 385; Viruses - 0; Other Eukaryotes - 339 (source: NCBI BLink).	43.4	4e-46
	4	UN014625	-2.00385	0.00448675	-1.01182	1	-0.954432	0.987569	0.079785	1		AT1G14130.1	---	2-oxoglutarate (2OG) and Fe(II)-dependent oxygenase superfamily protein	51.37	1e-107
	4	UN018693	-2.03414	0.00886786	-1.15355	1	-0.615879	1	0.14341	1		AT5G66390.1	---	Peroxidase superfamily protein	72.07	1e-177
	4	UN013036	-3.8182	0.0224984	-2.10268	1	-0.824905	1	-0.538591	1		AT5G57090.1	EIR1, WAV6, ATPIN2, PIN2, AGR, AGR1	Auxin efflux carrier family protein	69.8	4e-68
	4	UN002827	-3.05272	0.0271039	-1.50858	0.258721	-0.992734	0.839708	-0.371986	1		AT1G04110.1	SDD1	Subtilase family protein	46.45	0
	4	UN027932	-3.44701	0.000303166	-1.65164	0.127145	-1.02119	0.986135	-0.0634689	1		AT2G28790.1	---	Pathogenesis-related thaumatin superfamily protein	76.68	2e-127
	4	UN012126	-2.46562	0.000222157	-1.35842	0.36013	-0.206596	1	0.25031	1		---	---	---	---	---
	4	UN003641	-1.77902	0.0245457	-0.851449	1	-0.198517	1	0.00765229	1		---	---	---	---	---
	4	UN005537	-3.51088	4.48015e-08	-1.93794	0.46824	-0.386607	1	0.0433634	1		AT3G12580.1	HSP70, ATHSP70	heat shock protein 70	50.99	1e-179
	4	UN014341	-3.34493	0.0111139	-2.0037	1	-0.474655	1	-0.0477348	1		AT2G19810.1	---	CCCH-type zinc finger family protein	52.25	1e-101
	4	UN023291	-2.47224	5.11554e-07	-1.3866	1	-0.578869	1	0.650143	1		AT4G20260.4	ATPCAP1, PCAP1	plasma-membrane associated cation-binding protein 1	61.07	7e-41
	4	UN033344	-1.66886	0.0436346	-1.15358	1	-0.165521	1	0.336616	1		AT3G54420.1	ATEP3, ATCHITIV, CHIV, EP3	homolog of carrot EP3-3 chitinase	53.96	8e-72
	4	UN017321	-1.61552	0.00118657	-1.03395	1	-0.41775	1	---	---		AT4G37530.1	---	Peroxidase superfamily protein	73.18	2e-170
	4	UN023481	-1.71188	0.00739005	-1.02045	1	-0.527331	1	1.46266	1		AT1G44575.1	NPQ4, PSBS	Chlorophyll A-B binding family protein	87.64	1e-96
	4	UN017201	-2.34278	0.0416825	-1.29644	1	-0.16398	1	1.20232	0.0648262		AT4G35160.1	---	O-methyltransferase family protein	37.4	6e-70
	4	UN024648	-1.84598	0.0020423	-1.20551	1	-0.279221	1	0.89265	0.470538		AT2G39450.1	MTP11, ATMTP11	Cation efflux family protein	80.13	3e-63
	4	UN020865	-2.81618	8.40501e-06	-1.33322	0.843324	-1.33863	0.572778	1.20262	0.34507		---	---	---	---	---
	4	UN016146	-2.72841	0.00745972	-0.789115	1	-1.1598	1	0.795779	1		---	---	---	---	---
	4	UN017182	-2.53753	5.25657e-14	-0.778056	1	-1.12463	0.0826917	---	---		AT4G38970.1	FBA2	fructose-bisphosphate aldolase 2	85.79	0
	4	UN030454	-2.89389	0.000801024	-1.2336	1	-1.44567	0.391729	0.784778	1		AT5G03650.1	SBE2.2	starch branching enzyme 2.2	45.52	7e-35
	4	UN013651	-1.36801	0.0163889	-0.869165	1	-0.658873	1	0.417845	1		AT1G29980.1	---	Protein of unknown function, DUF642	70.9	0
	4	UN015949	-3.3959	0.0283435	-1.8502	1	-1.65613	1	0.629477	1		AT1G62440.1	LRX2	leucine-rich repeat/extensin 2	71.25	7e-158
	4	UN017923	-2.27162	1.56393e-08	-1.32335	0.201433	-0.828812	0.948526	0.442814	1		AT1G68630.1	---	PLAC8 family protein	55.84	6e-23
	4	UN029469	-2.50494	0.00799092	-1.52661	1	-1.00035	1	0.507166	1		AT1G72210.1	---	basic helix-loop-helix (bHLH) DNA-binding superfamily protein	55.45	8e-30
	4	UN009513	-1.73636	0.0135138	-1.21949	1	-0.604836	1	0.683268	1		AT2G45510.1	CYP704A2	cytochrome P450, family 704, subfamily A, polypeptide 2	55.89	0
	4	UN038096	-1.29921	0.0224984	-0.97083	0.649358	-0.545029	0.912475	0.659018	1		AT4G14960.2	TUA6	Tubulin/FtsZ family protein	100	3e-120
	4	UN016559	-1.8665	0.0370191	-0.166939	1	-0.624696	1	0.722452	1		AT5G40150.1	---	Peroxidase superfamily protein	62.25	2e-141
	4	UN006553	-2.73512	3.86671e-06	-0.51192	1	-0.447337	1	1.46618	1		AT5G44160.1	NUC	C2H2-like zinc finger protein	84.88	2e-100
	4	UN028327	-2.4438	1	-0.455241	1	-0.739763	1	1.44605	0.0105257		AT3G06070.1	---	unknown protein; BEST Arabidopsis thaliana protein match is: unknown protein (TAIR:AT5G19190.1); Has 33 Blast hits to 33 proteins in 12 species: Archae - 0; Bacteria - 0; Metazoa - 1; Fungi - 0; Plants - 32; Viruses - 0; Other Eukaryotes - 0 (source: NCBI BLink).	45.1	3e-17
	4	UN017204	-3.85953	0.711166	-0.8442	1	---	---	2.81159	1.58622e-06		AT3G25700.1	---	Eukaryotic aspartyl protease family protein	62.67	5e-149
	4	UN035224	-2.95733	0.00139709	-0.69421	1	-1.42857	1	---	---		AT1G11545.1	XTH8	xyloglucan endotransglucosylase/hydrolase 8	74.5	1e-108
	4	UN041279	-2.11068	0.0487106	-0.643012	1	-0.721232	1	1.54361	0.814245		AT5G57560.1	TCH4, XTH22	Xyloglucan endotransglucosylase/hydrolase family protein	71.64	3e-66
	4	UN006401	-2.07404	0.0114226	-0.855291	1	0.0240422	1	0.394206	1		AT1G76890.2	GT2, AT-GT2	Duplicated homeodomain-like superfamily protein	46.67	4e-57
	4	UN009353	-2.57061	1.10192e-07	-1.00241	1	0.554374	1	0.498691	1		AT3G17180.1	scpl33	serine carboxypeptidase-like 33	63.39	0
	4	UN001366	-1.28706	0.000566473	-0.624204	1	0.198062	1	0.480605	1		AT5G17330.1	GAD, GAD1	glutamate decarboxylase	78.37	0
	4	UN016414	-2.50248	0.00198979	-1.11593	1	0.341268	1	0.641904	1		AT4G13030.1	---	P-loop containing nucleoside triphosphate hydrolases superfamily protein	29.96	2e-24
	4	UN001761	-1.46917	0.0340008	-0.534867	1	0.560286	1	0.925578	1		AT3G06880.2	---	Transducin/WD40 repeat-like superfamily protein	28.04	1e-22
	4	UN016953	-2.07467	0.00285636	-0.737166	1	0.891861	0.977732	1.12151	0.239291		AT3G55800.1	SBPASE	sedoheptulose-bisphosphatase	77.46	0
	4	UN019612	-1.65732	0.0043537	-0.935154	1	0.443479	1	0.804183	0.69423		AT1G10200.1	WLIM1	GATA type zinc finger transcription factor family protein	82.86	6e-110
	4	UN004899	-1.24208	0.0427576	-0.565823	1	0.570322	1	0.332393	1		AT2G05160.1	---	CCCH-type zinc fingerfamily protein with RNA-binding domain	47.32	5e-144
	4	UN003844	-2.69941	1.61821e-06	-0.699013	1	1.06429	1	0.382829	1		AT4G02280.1	SUS3, ATSUS3	sucrose synthase 3	76.36	0
	4	UN017430	-5.0851	0.0442096	---	---	3.01471	1	0.306456	1		AT5G18200.1	---	UTP:galactose-1-phosphate uridylyltransferases;ribose-5-phosphate adenylyltransferases	57.61	5e-128
	4	UN018076	-2.46834	0.018211	-0.830107	1	1.26441	0.839825	-0.0337557	1		AT3G26430.1	---	GDSL-like Lipase/Acylhydrolase superfamily protein	61.62	4e-161
	4	UN028932	-1.30634	0.00322223	-0.462006	1	0.716228	0.494707	0.000297349	1		AT1G79040.1	PSBR	photosystem II subunit R	68.57	4e-55
	4	UN010570	-4.40558	0.00578468	-2.73267	0.0193831	2.24393	0.752649	-0.0145311	1		AT3G22970.1	---	Protein of unknown function (DUF506)	47.91	4e-94
	4	UN002323	-4.91318	0.0918149	-3.93618	1	3.65132	0.00334534	0.186561	1		AT2G28880.1	emb1997, ADCS	para-aminobenzoate (PABA) synthase family protein	64.71	0
	4	UN028916	-3.12965	0.388216	-2.46673	1	2.17205	0.00816577	-0.048453	1		AT5G39130.1	---	RmlC-like cupins superfamily protein	65.05	4e-90
	4	UN009137	-2.19486	0.0464949	-1.3227	0.211272	0.715678	0.937965	-0.098462	1		---	---	---	---	---
	4	UN017026	-8.8476	0.000994361	-4.14553	1	2.72947	1	0.276791	1		AT3G51440.1	---	Calcium-dependent phosphotriesterase superfamily protein	50.74	5e-109
	4	UN043637	-4.62355	0.0342157	-2.3526	1	1.34954	1	0.388348	1		AT2G28790.1	---	Pathogenesis-related thaumatin superfamily protein	77.42	2e-48
	4	UN044214	-4.71314	0.000650737	-2.95673	0.345049	1.05121	1	0.301429	1		AT2G28790.1	---	Pathogenesis-related thaumatin superfamily protein	76.51	6e-81
	4	UN028337	-4.18115	0.474584	-5.39759	0.0271451	3.25774	1	2.45989	1		AT1G23440.1	---	Peptidase C15, pyroglutamyl peptidase I-like	61.86	8e-96
	4	UN003288	-3.11829	0.0124096	-2.51333	0.0475199	0.638178	0.729855	1.8664	1		AT1G53350.1	---	Disease resistance protein (CC-NBS-LRR class) family	31.48	1e-101
	4	UN036812	-4.91811	0.0918149	-5.88728	0.000780097	1.29851	1	2.97508	1		AT5G61310.1	---	Cytochrome c oxidase subunit Vc family protein	78.18	2e-21
	4	UN017155	-1.90859	0.0523453	-1.76927	0.00694258	0.412364	1	---	---		AT5G38410.3	---	Ribulose bisphosphate carboxylase (small chain) family protein	71.69	9e-88
	4	UN030646	-5.08875	0.0438387	-4.78294	0.224526	---	---	1.72024	1		AT5G01750.2	---	Protein of unknown function (DUF567)	46.49	4e-34
	4	UN048093	-5.11924	0.506329	-5.22433	0.0388297	1.23208	1	---	---		---	---	---	---	---
	4	UN018028	-2.15241	3.88103e-05	0.753907	1	-0.393269	1	0.567754	1		AT3G28490.1	---	Oxoglutarate/iron-dependent oxygenase	73.68	8e-146
	4	UN006707	-2.21112	0.018914	0.35681	1	-0.543593	1	0.712044	1		AT2G39210.1	---	Major facilitator superfamily protein	54.91	2e-114
	4	UN021694	-7.9423	0.000780076	1.56852	1	-2.12126	1	1.2097	0.520978		AT1G21460.1	SWEET1, AtSWEET1	Nodulin MtN3 family protein	65.38	6e-101
	4	UN030856	-4.47724	0.0457608	2.43876	1	-2.33286	0.867687	1.92246	1		AT5G39890.1	---	Protein of unknown function (DUF1637)	38.75	5e-52
	4	UN008087	-1.63267	0.0324431	1.15116	1	-0.384762	1	0.819558	1		AT5G45340.1	CYP707A3	cytochrome P450, family 707, subfamily A, polypeptide 3	73.62	0
	4	UN011509	-1.57916	3.52502e-05	0.90742	1	-0.408144	1	---	---		AT5G39890.1	---	Protein of unknown function (DUF1637)	47.97	4e-70
	4	UN005088	-3.13109	0.00424102	2.24539	1	-0.203811	1	1.18404	0.591746		AT2G41510.1	ATCKX1, CKX1	cytokinin oxidase/dehydrogenase 1	46.09	2e-150
	4	UN044140	-2.60289	0.0443358	1.59641	1	-0.110519	1	1.28143	1		AT3G29970.1	---	B12D protein	65.43	4e-40
	4	UN011881	-5.31042	0.0184986	1.18217	1	-0.728281	1	-0.847975	1		AT2G32170.2	---	S-adenosyl-L-methionine-dependent methyltransferases superfamily protein	55.86	0
	4	UN012629	-3.44676	4.62397e-19	0.406717	1	-0.0523667	1	-0.104493	1		AT3G02550.1	LBD41	LOB domain-containing protein 41	59.83	2e-87
	4	UN020668	-1.95481	0.00012593	0.295877	1	0.0661273	1	-0.152271	1		AT1G14520.1	MIOX1	myo-inositol oxygenase 1	76.21	0
	4	UN006383	-3.58654	5.34364e-16	0.0767229	1	-0.446161	1	-0.169734	1		AT3G10040.1	---	sequence-specific DNA binding transcription factors	63.93	7e-59
	4	UN013697	-1.77585	0.000372122	0.0738139	1	-0.171818	1	-0.113757	1		AT4G29190.1	---	Zinc finger C-x8-C-x5-C-x3-H type family protein	50.37	7e-96
	4	UN012880	-1.73923	1.20344e-06	0.12582	1	-0.246034	1	-0.206676	1		AT4G19420.1	---	Pectinacetylesterase family protein	66.92	0
	4	UN004669	-7.31757	7.03591e-11	0.497569	1	-1.12426	1	-0.621504	1		AT5G45030.1	---	Trypsin family protein	69.73	0
	4	UN035088	-3.45228	0.000839863	0.193034	1	-0.519032	1	---	---		---	---	---	---	---
	4	UN010701	-3.65352	2.41219e-06	-0.157965	1	-0.23895	1	-0.783804	1		AT1G32060.1	PRK	phosphoribulokinase	80	0
	4	UN033913	-5.43301	4.33744e-27	-0.340305	1	-0.448878	1	---	---		---	---	---	---	---
	4	UN039291	-3.66555	0.00693357	-0.242499	1	-0.327677	1	-0.34685	1		AT5G25940.1	---	early nodulin-related	66.67	7e-15
	4	UN018540	-4.87622	7.03591e-11	-0.445822	1	-0.788785	1	-2.14533	1		AT5G10530.1	---	Concanavalin A-like lectin protein kinase family protein	60.13	7e-125
	4	UN007772	-2.36962	1.68842e-06	0.294758	1	-0.39782	1	-0.756647	1		AT1G64980.1	---	Nucleotide-diphospho-sugar transferases superfamily protein	77.53	1e-140
	4	UN021602	-2.18882	0.000499805	0.0926873	1	-0.471936	1	-0.595008	1		AT5G38420.1	---	Ribulose bisphosphate carboxylase (small chain) family protein	58.14	1e-56
	4	UN018429	-2.62709	7.33446e-05	0.113233	1	-0.828583	1	-0.609021	1		AT5G13870.1	EXGT-A4, XTH5	xyloglucan endotransglucosylase/hydrolase 5	83.94	0
	4	UN012319	-5.77697	0.00144052	-0.181005	1	-2.33915	1	-1.33195	1		AT3G09410.1	---	Pectinacetylesterase family protein	58.6	0
	4	UN031678	-4.78473	0.030263	-0.348061	1	-1.52297	1	-1.43661	1		AT2G44310.1	---	Calcium-binding EF-hand family protein	49.28	4e-43
	4	UN033492	-6.47645	2.74941e-08	-0.375555	1	-2.18382	1	-1.57235	1		AT2G44310.1	---	Calcium-binding EF-hand family protein	50.74	9e-42
	4	UN026316	-1.78932	0.000446902	0.122534	1	-0.457714	1	-0.924385	1		AT5G64080.1	---	Bifunctional inhibitor/lipid-transfer protein/seed storage 2S albumin superfamily protein	60.49	1e-30
	4	UN023543	-2.78315	0.0276809	0.499683	1	-0.753694	1	-1.35691	1		AT4G35840.1	---	RING/U-box superfamily protein	67.61	7e-105
	4	UN006487	-2.73601	1.67423e-05	0.341719	1	-0.951203	1	-1.06374	1		AT5G65280.1	GCL1	GCR2-like 1	65.91	0
	4	UN037255	-1.68648	0.00539571	0.207642	1	-0.495921	1	---	---		AT5G64620.1	C/VIF2, ATC/VIF2	cell wall / vacuolar inhibitor of fructosidase 2	37.82	7e-33
	4	UN003312	-5.56667	0.00531626	0.893023	1	-0.627075	1	-3.30806	1		AT5G53170.1	FTSH11	FTSH protease 11	83.23	0
	4	UN026908	-4.53613	0.00830728	0.739738	1	-0.34188	1	-3.09437	1		AT5G15120.1	---	Protein of unknown function (DUF1637)	36.65	6e-50
	4	UN042739	-5.37856	0.030772	0.928469	1	-0.325388	1	---	---		---	---	---	---	---
	4	UN008118	-1.19917	0.0224873	-0.0725215	1	-0.603495	0.999788	-0.0581021	1		AT5G39660.1	CDF2	cycling DOF factor 2	34.39	2e-25
	4	UN020808	-3.80072	3.72282e-06	-0.0301806	1	-2.41468	0.2491	-0.621776	1		---	---	---	---	---
	4	UN015003	-5.56771	0.00510635	0.457773	1	-2.11798	1	-0.533304	1		AT3G02210.1	COBL1	COBRA-like protein 1 precursor	57.43	4e-171
	4	UN021032	-2.20746	0.000805795	0.218377	1	-0.946312	0.413256	-0.0014171	1		AT1G77330.1	---	2-oxoglutarate (2OG) and Fe(II)-dependent oxygenase superfamily protein	64.92	3e-140
	4	UN004023	-1.32744	0.0328805	0.165374	1	-0.76496	1	0.238113	1		AT1G27680.1	APL2	ADPGLC-PPase large subunit	70.59	0
	4	UN017428	-1.55436	0.0036515	0.45441	1	-0.774321	1	0.18717	1		AT1G09750.1	---	Eukaryotic aspartyl protease family protein	60.33	2e-162
	4	UN026351	-6.78718	3.77734e-15	1.6277	1	-3.68947	0.981243	-0.0219748	1		AT4G26880.1	---	Stigma-specific Stig1 family protein	49.17	1e-31
	4	UN012728	-2.91625	0.0338625	-0.818594	1	-1.20029	1	-0.361628	1		AT3G16520.3	UGT88A1	UDP-glucosyl transferase 88A1	47.1	1e-128
	4	UN028681	-4.6951	7.5841e-05	-1.46107	1	-1.59351	1	-0.425073	1		AT2G29960.1	CYP5, ATCYP5, CYP19-4	cyclophilin 5	87.78	2e-107
	4	UN025926	-1.6401	0.000134796	-0.378736	1	-0.640355	0.896652	0.0303311	1		AT1G77120.1	ADH1, ADH, ATADH, ATADH1	alcohol dehydrogenase 1	84.09	6e-154
	4	UN030441	-2.94705	4.18755e-05	-0.711044	1	-1.26135	0.943702	0.0242967	1		AT5G47610.1	---	RING/U-box superfamily protein	55.71	1e-22
	4	UN001965	-5.15563	0.0338625	-0.318726	1	-1.37828	1	-0.17936	1		AT5G20300.1	---	Avirulence induced gene (AIG1) family protein	51.73	0
	4	UN007660	-2.01902	1.33223e-06	-0.196427	1	-0.646004	0.849701	-0.0495938	1		AT1G76550.1	---	Phosphofructokinase family protein	82.75	0
	4	UN011080	-5.78599	0.00140719	-0.435835	1	-0.989626	1	-0.254131	1		AT2G16890.2	---	UDP-Glycosyltransferase superfamily protein	50.33	1e-40
	4	UN017780	-3.09691	0.00205927	-0.727343	1	-0.790475	1	-0.0634514	1		AT1G02630.1	---	Nucleoside transporter family protein	53.49	7e-130
	4	UN011702	-1.9818	0.0224984	-0.429377	1	-0.306072	1	-0.18934	1		AT5G12250.1	TUB6	beta-6 tubulin	97.2	0
	4	UN009507	-1.74059	0.0192559	-0.234341	1	-0.372317	1	-0.170744	1		AT1G13130.1	---	Cellulase (glycosyl hydrolase family 5) protein	54.24	0
	4	UN031027	-2.18627	0.00157269	-0.375706	1	-0.542798	1	-0.18553	1		AT1G51400.1	---	Photosystem II 5 kD protein	42.48	4e-10
	4	UN023926	-2.45341	6.68073e-07	-0.539942	1	-0.233593	1	0.15072	1		AT4G38400.1	ATEXLA2, EXPL2, ATEXPL2, ATHEXP BETA 2.2, EXLA2	expansin-like A2	62.2	2e-101
	4	UN025402	-1.96301	4.8692e-07	-0.728331	1	-0.1768	1	-0.0371095	1		AT5G38410.3	---	Ribulose bisphosphate carboxylase (small chain) family protein	75.64	1e-85
	4	UN006946	-7.3636	5.11732e-11	-1.0785	1	-0.29097	1	-1.31259	0.770884		AT5G57800.1	FLP1, YRE, CER3, WAX2	Fatty acid hydroxylase superfamily	67.36	0
	4	UN001194	-3.47143	3.96463e-07	-0.621135	1	0.048736	1	-0.367042	1		AT5G46330.1	FLS2	Leucine-rich receptor-like protein kinase family protein	51.63	0
	4	UN009352	-1.36604	0.00937468	-0.303365	1	0.0419984	1	-0.206317	1		AT1G06750.2	---	P-loop containing nucleoside triphosphate hydrolases superfamily protein	64.33	0
	4	UN006336	-3.17717	0.0411379	-0.860309	1	-0.198253	1	---	---		AT5G51560.1	---	Leucine-rich repeat protein kinase family protein	61.72	0
	4	UN028162	-2.18018	0.0346804	-0.623656	1	-0.106081	1	-0.300631	1		---	---	---	---	---
	4	UN014581	-5.61847	0.0346924	-2.23489	1	-0.984743	1	-1.00659	0.988104		AT2G19810.1	---	CCCH-type zinc finger family protein	51.6	6e-103
	4	UN006117	-1.75637	0.034498	-0.526268	1	-0.389403	1	-0.27659	1		AT3G13560.1	---	O-Glycosyl hydrolases family 17 protein	65.25	0
	4	UN021748	-2.4236	0.0235677	-0.768851	1	-0.521911	1	-0.616363	1		AT3G16770.1	RAP2.3, ATEBP, ERF72, EBP	ethylene-responsive element binding protein	41.83	3e-36
	4	UN009720	-2.94249	1.40334e-05	-0.593318	1	-0.587715	1	-0.678529	1		AT5G10770.1	---	Eukaryotic aspartyl protease family protein	54.24	4e-137
	4	UN016108	-3.30877	0.0127843	-0.538806	1	-0.669881	1	-0.703204	1		AT2G42760.1	---	unknown protein; CONTAINS InterPro DOMAIN/s: Protein of unknown function DUF1685 (InterPro:IPR012881); Has 170 Blast hits to 164 proteins in 34 species: Archae - 0; Bacteria - 1; Metazoa - 26; Fungi - 10; Plants - 107; Viruses - 0; Other Eukaryotes - 26 (source: NCBI BLink).	38.71	3e-16
	4	UN031662	-2.86498	2.88421e-10	-0.479923	1	-0.547539	1	---	---		AT2G21045.1	---	Rhodanese/Cell cycle control phosphatase superfamily protein	55.08	3e-47
	4	UN005721	-2.37008	0.00189581	-0.732733	1	-0.293371	1	-0.681344	1		AT3G04810.1	ATNEK2, NEK2	NIMA-related kinase 2	61.29	0
	4	UN001294	-1.22257	0.00555965	-0.324439	1	-0.0445222	1	-0.358919	1		AT2G21770.1	CESA9, CESA09	cellulose synthase A9	79.4	0
	4	UN036472	-5.61184	5.44324e-13	-1.33555	1	-0.58819	1	-1.85793	1		AT2G18420.1	---	Gibberellin-regulated family protein	75	5e-17
	4	UN015262	-1.33276	0.00683814	-0.23733	1	-0.218217	1	0.219206	1		AT1G31330.1	PSAF	photosystem I subunit F	84.93	9e-82
	4	UN026806	-1.95092	0.0267185	-0.255216	1	-0.413549	1	0.390116	1		AT3G51520.1	---	diacylglycerol acyltransferase family	58.64	2e-121
	4	UN012539	-2.60952	2.04505e-08	-0.215527	1	-0.322719	1	0.232206	1		AT5G11090.1	---	serine-rich protein-related	69.79	4e-40
	4	UN015735	-2.13767	0.0168575	-0.290057	1	-0.32142	1	0.234467	1		AT3G54000.1	---	CONTAINS InterPro DOMAIN/s: Uncharacterised conserved protein UCP022260 (InterPro:IPR016802); Has 94 Blast hits to 94 proteins in 14 species: Archae - 0; Bacteria - 0; Metazoa - 0; Fungi - 0; Plants - 94; Viruses - 0; Other Eukaryotes - 0 (source: NCBI BLink).	32.26	9e-32
	4	UN034574	-4.35116	2.00448e-14	-0.0647834	1	-0.709156	1	0.301429	1		---	---	---	---	---
	4	UN003334	-2.16292	0.000990197	0.152159	1	-0.415582	1	0.305858	1		AT1G09090.2	ATRBOHB, RBOHB	respiratory burst oxidase homolog B	67.3	0
	4	UN012381	-6.11686	0.000265971	0.196558	1	-1.68454	1	0.951704	1		AT4G36250.1	ALDH3F1	aldehyde dehydrogenase 3F1	58.92	0
	4	UN035086	-4.29971	9.09843e-12	0.112012	1	-1.15971	1	0.656736	1		AT5G25940.1	---	early nodulin-related	61.02	7e-19
	4	UN013997	-3.51258	0.0271406	0.0424701	1	-1.0578	0.433679	0.228821	1		AT4G02330.1	ATPMEPCRB	Plant invertase/pectin methylesterase inhibitor superfamily	59.74	0
	4	UN024661	-3.04986	6.83038e-05	-0.251058	1	-0.913861	1	0.399433	1		AT1G04040.1	---	HAD superfamily, subfamily IIIB acid phosphatase	57.66	5e-99
	4	UN052041	-5.49249	0.000191627	-0.464368	1	-1.68212	1	---	---		AT2G44310.1	---	Calcium-binding EF-hand family protein	52.46	3e-40
	4	UN025997	-2.60922	0.00487815	0.526862	1	0.719466	1	0.268236	1		AT5G49120.1	---	Protein of unknown function (DUF581)	52.38	3e-23
	4	UN017527	-1.62263	0.0126124	-0.0368102	1	0.495986	1	0.346805	1		AT2G31730.1	---	basic helix-loop-helix (bHLH) DNA-binding superfamily protein	64.55	3e-45
	4	UN046060	-6.30532	2.86023e-12	-0.05474	1	1.32848	1	0.640663	1		---	---	---	---	---
	4	UN013900	-1.72212	0.00726776	0.118039	1	0.709906	1	0.610882	1		AT2G27920.1	SCPL51	serine carboxypeptidase-like 51	62.18	0
	4	UN047971	-3.63057	0.000171501	0.708702	1	1.87331	1	1.47121	1		AT4G10265.1	---	Wound-responsive family protein	55.26	5e-22
	4	UN001862	-1.24644	0.00483992	-0.0636882	1	0.271585	1	0.457069	1		AT1G68560.1	ATXYL1, XYL1, TRG1	alpha-xylosidase 1	70.42	0
	4	UN012318	-6.6023	1.28895e-06	0.431368	1	0.576119	1	2.98416	1		AT2G47970.1	---	Nuclear pore localisation protein NPL4	76.47	4e-57
	4	UN014632	-1.51352	0.0111704	0.0615077	1	-0.0101547	1	0.659945	1		AT1G05680.1	UGT74E2	Uridine diphosphate glycosyltransferase 74E2	48.44	1e-154
	4	UN018718	-6.2555	3.01598e-07	0.614291	1	0.195228	1	1.87913	1		AT1G29660.1	---	GDSL-like Lipase/Acylhydrolase superfamily protein	67.06	9e-148
	4	UN022000	-3.22662	6.20415e-18	-0.347684	1	0.307245	1	1.05024	1		AT3G16770.1	RAP2.3, ATEBP, ERF72, EBP	ethylene-responsive element binding protein	52.94	6e-40
	4	UN048687	-5.5243	6.69349e-05	-0.271433	1	0.254412	1	---	---		---	---	---	---	---
	4	UN020798	-2.89025	0.0247669	0.732953	1	0.24085	1	1.27429	1		AT5G65640.1	bHLH093	beta HLH protein 93	65.26	9e-69
	4	UN021973	-3.51711	0.00040295	0.351619	1	-0.381208	1	2.09678	0.229955		AT4G10265.1	---	Wound-responsive family protein	49.43	2e-17
	4	UN007320	-1.21679	0.0154441	0.0210497	1	-0.181519	1	0.539968	1		AT1G71020.1	---	ARM repeat superfamily protein	70.72	0
	4	UN056069	-3.8297	0.00249528	0.149578	1	-0.378793	1	1.51331	1		AT4G10265.1	---	Wound-responsive family protein	48.78	5e-17
	4	UN003706	-8.03553	3.29176e-17	-1.48645	1	0.191983	1	-0.182494	1		AT3G01750.1	---	Ankyrin repeat family protein	50.73	0
	4	UN017661	-2.04491	2.76991e-05	-0.224859	1	0.165642	1	0.051206	1		AT3G47470.1	LHCA4, CAB4	light-harvesting chlorophyll-protein complex I subunit A4	81.89	6e-152
	4	UN021764	-5.11328	0.047178	---	---	0.00247349	1	0.399433	1		AT5G35530.1	---	Ribosomal protein S3 family protein	87.28	1e-151
	4	UN023173	-3.08211	7.26178e-09	-0.697182	1	-0.0438116	1	0.323468	1		AT4G25810.1	XTR6, XTH23	xyloglucan endotransglycosylase 6	70.29	6e-148
	4	UN028242	-3.60357	0.0415448	-0.872167	1	0.259462	1	0.36396	1		AT5G14320.1	---	Ribosomal protein S13/S18 family	68.79	4e-73
	4	UN029108	-3.2905	0.0450446	-0.65556	1	0.297287	1	---	---		AT1G22810.1	---	Integrase-type DNA-binding superfamily protein	61	5e-38
	4	UN037495	-4.34292	8.6163e-10	0.0202666	1	0.22769	1	0.442065	1		---	---	---	---	---
	4	UN002026	-4.10289	0.0043527	-0.878022	1	0.823722	1	-0.196419	1		AT2G25800.1	---	Protein of unknown function (DUF810)	61.49	0
	4	UN002850	-2.37909	0.0295117	-0.474925	1	0.362532	1	0.0427	1		AT3G13750.1	BGAL1	beta galactosidase 1	71.5	0
	4	UN010199	-1.9212	0.000248924	-0.392968	1	0.482216	1	-0.258699	1		AT2G27500.1	---	Glycosyl hydrolase superfamily protein	64.62	2e-171
	4	UN007833	-1.6853	0.00805293	-0.4799	1	0.337874	1	-0.326014	1		AT3G13750.1	BGAL1	beta galactosidase 1	71.4	0
	4	UN012945	-2.33048	1.01471e-06	-0.732107	1	0.51757	1	-0.338284	1		AT3G26650.1	GAPA, GAPA-1	glyceraldehyde 3-phosphate dehydrogenase A subunit	90.7	0
	4	UN018033	-2.6756	3.88103e-05	-0.379705	1	0.967362	0.253586	-0.18553	1		AT3G26430.1	---	GDSL-like Lipase/Acylhydrolase superfamily protein	59.94	2e-152
	4	UN018827	-1.77228	0.00909822	-0.287084	1	0.694328	1	-0.343359	1		AT4G10340.1	LHCB5	light harvesting complex of photosystem II 5	83.52	6e-145
	4	UN022009	-1.35246	0.0434833	-0.289451	1	0.637289	1	-0.259803	1		AT4G33110.1	---	S-adenosyl-L-methionine-dependent methyltransferases superfamily protein	50.3	3e-117
	4	UN007598	-2.00837	2.1032e-07	0.0583954	1	0.531908	1	-0.197336	1		AT4G26270.1	PFK3	phosphofructokinase 3	84.44	0
	4	UN022039	-2.77681	3.11153e-09	0.0162973	1	0.404067	1	-0.135886	1		AT3G16770.1	RAP2.3, ATEBP, ERF72, EBP	ethylene-responsive element binding protein	52.94	6e-40
	4	UN023993	-5.39044	6.25068e-27	-0.220738	1	0.866132	1	-0.0775412	1		AT3G02550.1	LBD41	LOB domain-containing protein 41	70.06	2e-85
	4	UN063786	-4.32226	9.00525e-09	-0.328245	1	0.721951	1	-0.2516	1		AT4G10265.1	---	Wound-responsive family protein	47.73	1e-17
	4	UN039215	-4.37048	2.57707e-20	0.353534	1	0.661596	1	---	---		AT4G10265.1	---	Wound-responsive family protein	56.47	3e-26
	4	UN029503	-1.00106	1	0.714789	1	0.644807	1	1.28026	0.044707		AT3G58050.1	---	unknown protein; BEST Arabidopsis thaliana protein match is: unknown protein (TAIR:AT2G41960.1); Has 13384 Blast hits to 8116 proteins in 546 species: Archae - 41; Bacteria - 766; Metazoa - 5596; Fungi - 1431; Plants - 589; Viruses - 46; Other Eukaryotes - 4915 (source: NCBI BLink).	35.38	1e-17
	4	UN016303	-2.44501	3.30288e-05	0.572879	1	-0.40791	1	2.27856	1		AT1G51540.1	---	Galactose oxidase/kelch repeat superfamily protein	69.23	0
	4	UN001369	-1.41522	0.000143679	0.406509	1	-0.38208	1	1.07298	0.136538		AT5G49690.1	---	UDP-Glycosyltransferase superfamily protein	39.61	1e-114
	4	UN020947	-2.33802	1.90403e-05	0.724069	1	-0.914936	1	2.20817	1		AT1G72210.1	---	basic helix-loop-helix (bHLH) DNA-binding superfamily protein	48.37	2e-79
	4	UN029010	-2.46107	0.0315684	0.272339	1	-0.936624	0.864168	2.70741	1		AT2G10940.1	---	Bifunctional inhibitor/lipid-transfer protein/seed storage 2S albumin superfamily protein	80.68	2e-25
	4	UN007372	-3.40602	0.00527004	-1.0792	1	0.127944	1	2.25731	1		AT2G36630.1	---	Sulfite exporter TauE/SafE family protein	71.5	7e-180
	4	UN007068	-5.20148	0.0287262	-1.98645	1	1.17201	1	4.212	2.02487e-06		---	---	---	---	---
	4	UN019548	-2.46424	1.33911e-07	-0.81093	1	0.497507	1	2.02715	1		AT3G61470.1	LHCA2	photosystem I light harvesting complex gene 2	91.79	7e-141
	4	UN009485	-1.81006	0.0395343	-0.484954	1	-0.353012	1	1.71901	1		AT3G23160.1	---	Protein of unknown function (DUF668)	47.97	2e-35
	4	UN023435	-2.15155	0.0484322	-0.486605	1	-0.0928337	1	2.28484	1		AT2G44740.1	CYCP4;1	cyclin p4;1	68.23	4e-92
	4	UN031222	-3.6406	0.035058	-0.268034	1	-0.546818	1	3.26582	0.348906		AT3G10190.1	---	Calcium-binding EF-hand family protein	55.65	3e-32
	4	UN003379	-2.01827	0.00937571	-0.268872	1	-0.0562365	1	1.4364	1		AT1G10020.1	---	Protein of unknown function (DUF1005)	65.37	0
	4	UN016445	-4.62047	0.032941	-0.366938	1	-0.464813	1	3.35521	2.46413e-13		AT3G06868.1	---	unknown protein; FUNCTIONS IN: molecular_function unknown; INVOLVED IN: biological_process unknown; LOCATED IN: cellular_component unknown; BEST Arabidopsis thaliana protein match is: unknown protein (TAIR:AT5G49100.1); Has 30201 Blast hits to 17322 proteins in 780 species: Archae - 12; Bacteria - 1396; Metazoa - 17338; Fungi - 3422; Plants - 5037; Viruses - 0; Other Eukaryotes - 2996 (source: NC…	36.72	5e-34
	4	UN022634	-2.12396	0.000577221	-0.456455	1	-0.0732767	1	1.38364	1		AT2G06520.1	PSBX	photosystem II subunit X	54.17	2e-12
	4	UN039726	-2.74899	0.000126049	-0.549075	1	-0.130009	1	---	---		---	---	---	---	---
	4	UN033558	-4.40525	1.85844e-16	0.0107939	1	0.955569	1	3.60986	0.775704		AT4G10265.1	---	Wound-responsive family protein	57.89	2e-16
	4	UN016540	-1.90561	5.01167e-05	0.395694	1	-0.0711986	1	1.47923	1		AT1G15820.1	LHCB6, CP24	light harvesting complex photosystem II subunit 6	81.82	2e-132
	4	UN042738	-3.84522	1	0.337407	1	0.196533	1	2.99796	0.0188653		---	---	---	---	---
	4	UN021603	-1.94715	0.00999144	-0.066331	1	-0.00652578	1	2.41919	0.128596		AT5G38420.1	---	Ribulose bisphosphate carboxylase (small chain) family protein	58.14	1e-56
	4	UN024259	-1.47743	1	-2.78222	1	-1.2953	1	2.58903	2.00329e-06		AT5G02500.1	HSC70-1, HSP70-1, AT-HSC70-1, HSC70	heat shock cognate protein 70-1	79.04	0
	4	UN027472	-2.75381	0.546768	-2.89077	0.0042768	-1.38823	1	2.60336	1		AT4G25150.1	---	HAD superfamily, subfamily IIIB acid phosphatase	51.16	2e-80
	4	UN003533	-1.28233	0.0105853	-0.133872	1	-0.92864	1	0.844914	1		AT2G01190.1	---	Octicosapeptide/Phox/Bem1p family protein	41.75	5e-73
	4	UN014987	-1.21277	0.0202389	-0.335641	1	-0.872837	0.384217	0.826194	1		AT1G75780.1	TUB1	tubulin beta-1 chain	96.97	0
	4	UN011714	-2.16997	0.0210638	-0.375545	1	-2.54317	5.10382e-06	1.05617	1		AT3G54400.1	---	Eukaryotic aspartyl protease family protein	64.9	7e-176
	4	UN013336	-1.61905	0.000297024	-0.320385	1	-1.49448	0.0231752	0.905624	1		AT1G20330.1	SMT2, CVP1, FRL1	sterol methyltransferase 2	78.65	0
	4	UN017288	-1.669	0.00203446	0.234511	1	-1.90564	0.00642257	0.793409	1		AT2G23910.1	---	NAD(P)-binding Rossmann-fold superfamily protein	46.05	3e-91
	4	UN004461	-1.89178	0.000732986	-2.15263	0.819928	-1.67603	0.402905	1.00587	1		AT4G00340.1	RLK4	receptor-like protein kinase 4	32.27	1e-105
	4	UN005410	-1.0602	0.0176953	-0.636458	1	-0.825843	0.503492	0.551844	1		AT5G49720.1	ATGH9A1, TSD1, DEC, KOR, RSW2, IRX2, KOR1, GH9A1	glycosyl hydrolase 9A1	77.58	0
	4	UN008782	-2.84821	0.446606	-1.17104	1	-2.51218	1	1.37197	0.0288627		AT1G69870.1	NRT1.7	nitrate transporter 1.7	56.52	3e-40
	4	UN004334	-5.26603	0.0281859	-4.58258	0.361871	-5.57764	0.0182825	2.58189	1		AT1G68920.1	---	basic helix-loop-helix (bHLH) DNA-binding superfamily protein	39.06	4e-87
	4	UN015412	-1.42283	0.0105616	-1.51195	0.48455	-2.00495	0.173578	0.833778	0.701533		AT5G54160.1	ATOMT1, OMT1	O-methyltransferase 1	64.08	8e-171
	4	UN016294	-1.63888	0.239205	-0.992957	0.633692	-1.82559	0.00159507	0.637083	1		AT4G30440.1	GAE1	UDP-D-glucuronate 4-epimerase 1	86.59	0
	4	UN024595	-1.481	0.0611513	-0.994641	1	-2.55349	0.0171155	1.44062	1		---	---	---	---	---
	4	UN005953	-1.1604	1	-1.16704	1	-1.5533	0.307169	2.40583	0.00137803		AT1G31770.1	ABCG14	ATP-binding cassette 14	74.47	0
	4	UN012521	-1.94196	6.74122e-05	-1.04946	0.797492	-1.68473	0.0041643	1.78845	1		AT4G01470.1	GAMMA-TIP3, TIP1;3, ATTIP1.3	tonoplast intrinsic protein 1;3	80.95	2e-148
	4	UN013060	-2.80558	0.0376787	-2.08189	0.483301	-2.52703	0.459377	3.09468	1		AT3G61880.2	CYP78A9	cytochrome p450 78a9	69.92	0
	4	UN022856	-1.41467	0.429269	-0.771097	1	-1.65579	0.850529	1.69744	0.015964		AT3G30340.1	---	nodulin MtN21 /EamA-like transporter family protein	30.66	3e-32
	4	UN032381	-0.976338	0.022261	-0.55908	1	-0.555606	0.981939	0.958005	1		AT1G13440.1	GAPC-2, GAPC2	glyceraldehyde-3-phosphate dehydrogenase C2	87.1	2e-87
	4	UN016365	-1.39727	0.0844395	-1.07509	1	0.141997	1	2.07834	0.0483546		AT3G06130.1	---	Heavy metal transport/detoxification superfamily protein	74.32	1e-32
	4	UN028676	-2.32417	0.0192559	-0.942945	0.818294	-0.448766	1	2.92176	1		AT1G20340.1	DRT112, PETE2	Cupredoxin superfamily protein	64.52	4e-57
	4	UN013257	-1.77411	0.0384616	-0.919679	1	-0.588916	1	1.97278	1		AT1G53380.1	---	Plant protein of unknown function (DUF641)	46.25	1e-108
	4	UN035672	-2.47538	0.0200419	-1.21486	1	-0.569632	1	2.70162	1		---	---	---	---	---
	4	UN004596	-2.10186	0.00023104	-0.993295	1	-1.69722	0.0103381	---	---		AT2G01570.1	RGA1, RGA	GRAS family transcription factor family protein	59.33	0
	4	UN003358	-0.208573	1	-2.3901	0.0355374	-0.0533554	1	-0.925587	1		AT2G46830.1	CCA1	circadian clock associated 1	75.2	7e-41
	4	UN006905	---	---	-5.31512	0.029078	0.025504	1	-0.74978	1		AT5G03910.1	ATATH12, ATH12	ABC2 homolog 12	60.62	0
	4	UN011463	-2.48584	0.00877762	-0.0949847	1	-1.46461	0.277405	-2.5875	0.321367		AT3G20015.1	---	Eukaryotic aspartyl protease family protein	69.73	3e-180
	4	UN016542	-1.17793	0.0265189	0.187505	1	-1.11003	0.257084	-1.48535	1		AT2G41480.1	---	Peroxidase superfamily protein	63.38	3e-156
	4	UN002116	-1.9078	0.0309159	-0.0556931	1	-0.361241	1	-1.72761	0.619481		AT4G07960.1	ATCSLC12, CSLC12	Cellulose-synthase-like C12	75.95	0
	4	UN011283	-2.38377	0.00543608	-0.056777	1	-0.590777	1	-2.47901	1		AT3G19850.1	---	Phototropic-responsive NPH3 family protein	47.29	8e-61
	4	UN020983	-1.80929	0.00959277	-0.261448	1	-0.544503	1	-1.46808	1		AT2G25810.1	TIP4;1	tonoplast intrinsic protein 4;1	72.02	1e-103
	4	UN013251	-1.3608	0.00264202	-0.623746	1	-0.134019	1	-1.72512	1		AT4G34640.1	SQS1, ERG9	squalene synthase 1	76.58	0
	4	UN015014	-1.61213	0.0048883	0.324417	1	-0.0909757	1	-1.63277	1		AT1G03475.1	LIN2, HEMF1, ATCPO-I	Coproporphyrinogen III oxidase	77.12	0
	4	UN009437	-5.47213	0.00853249	-1.3537	1	-0.193672	1	-2.58025	1		AT3G50120.1	---	Plant protein of unknown function (DUF247)	35.46	1e-79
	4	UN011715	-1.8468	0.0196297	-0.479348	1	-0.0612324	1	-1.11914	1		AT2G16430.2	PAP10, ATPAP10	purple acid phosphatase 10	76.19	0
	4	UN015808	-1.62016	0.0395802	-0.67332	1	-0.15293	1	-0.740403	1		---	---	---	---	---
	4	UN007802	-2.03964	0.00389608	-0.659541	1	-0.137504	1	-1.9319	1		AT2G26510.1	PDE135	Xanthine/uracil permease family protein	66.73	0
	4	UN029791	-1.22849	0.0150115	-0.693943	1	-0.0175525	1	-0.962499	1		AT3G52990.1	---	Pyruvate kinase family protein	81.21	0
	4	UN035444	-3.41224	1	-1.5974	1	0.449951	1	-2.84215	0.0262182		---	---	---	---	---
	4	UN004998	-2.9411	0.00084699	-0.266912	1	0.820179	1	-2.25798	1		AT1G70520.1	CRK2	cysteine-rich RLK (RECEPTOR-like protein kinase) 2	38.53	2e-124
	4	UN009097	-2.71464	3.96547e-05	-0.319038	1	0.526634	1	-1.66878	1		AT1G67480.1	---	Galactose oxidase/kelch repeat superfamily protein	60.1	5e-164
	4	UN022065	-4.34031	0.0212662	-0.886261	1	0.83602	1	-2.9291	0.076749		AT3G16770.1	RAP2.3, ATEBP, ERF72, EBP	ethylene-responsive element binding protein	52.94	6e-40
	4	UN018577	-2.66402	3.10913e-10	0.136492	1	0.350438	1	-1.5194	1		AT5G47060.1	---	Protein of unknown function (DUF581)	57.95	2e-26
	4	UN003571	-2.55741	1	0.484977	1	0.671645	1	-1.49766	0.0166827		AT1G73400.1	---	Pentatricopeptide repeat (PPR) superfamily protein	66.24	0
	4	UN027760	-2.42708	9.09442e-07	0.185581	1	0.857531	0.839825	-1.37502	1		AT2G31980.1	AtCYS2, CYS2	PHYTOCYSTATIN 2	38.68	4e-20
	4	UN025599	-6.07355	4.07173e-05	0.101413	1	1.79943	1	-2.06919	1		AT5G56550.1	OXS3, ATOXS3	oxidative stress 3	55	2e-21
	4	UN028998	-1.30566	0.0413967	-0.162672	1	0.46847	1	-0.620718	1		AT4G12800.1	PSAL	photosystem I subunit l	74.65	6e-95
	4	UN023766	-2.48748	0.0283824	-0.235456	1	0.155803	1	-0.650401	1		AT4G22570.1	APT3	adenine phosphoribosyl transferase 3	82.32	3e-107
	4	UN033059	-4.90594	3.28797e-13	0.0459194	1	0.633938	1	-1.52769	1		AT4G10270.1	---	Wound-responsive family protein	56.84	2e-26
	4	UN001259	-2.17218	5.01021e-08	-0.798756	1	0.321615	1	-0.670462	1		AT1G78060.1	---	Glycosyl hydrolase family protein	70.97	6e-86
	4	UN007242	-1.56058	0.0197617	-0.335977	1	0.856998	0.943525	-0.47912	1		AT1G23170.2	---	Protein of unknown function DUF2359, transmembrane	46.56	3e-137
	4	UN012609	-1.63842	0.0153851	-0.42007	1	0.766435	0.655917	-0.639637	1		AT5G46110.4	APE2, TPT	Glucose-6-phosphate/phosphate translocator-related	82.75	0
	4	UN017613	-1.96906	0.00166805	-0.520351	1	0.851808	0.88546	-0.745185	1		AT2G06520.1	PSBX	photosystem II subunit X	64.47	6e-10
	4	UN025821	-2.37473	0.0217861	-0.580931	1	0.74768	1	-0.755498	1		AT2G20260.1	PSAE-2	photosystem I subunit E-2	83.61	6e-34
	4	UN020524	-1.93199	4.36228e-06	-0.865316	0.581189	0.623427	0.823399	-0.701316	1		AT5G66570.1	PSBO-1, OEE1, OEE33, OE33, PSBO1, MSP-1	PS II oxygen-evolving complex 1	77.41	0
	4	UN037688	-3.70166	8.4829e-05	-1.57052	0.844049	1.55646	1	-1.54597	1		AT2G28790.1	---	Pathogenesis-related thaumatin superfamily protein	78.05	6e-68
	4	UN006948	-3.67588	0.866219	-2.6329	1	0.990328	1	-1.40254	0.0011949		AT5G15010.1	---	Tetratricopeptide repeat (TPR)-like superfamily protein	57.99	0
	4	UN015991	-1.07394	0.0235931	-1.17292	0.267504	0.586423	1	-0.342111	1		AT3G43190.1	SUS4, ATSUS4	sucrose synthase 4	74.23	0
	4	UN025565	-1.83234	0.0422793	-1.09825	1	1.54258	0.330961	-1.28133	1		AT1G30380.1	PSAK	photosystem I subunit K	75.83	9e-63
	4	UN001876	-1.04949	1	-2.1819	0.0485084	0.532314	1	-0.661153	1		AT5G41110.1	---	unknown protein; INVOLVED IN: biological_process unknown; LOCATED IN: chloroplast; BEST Arabidopsis thaliana protein match is: unknown protein (TAIR:AT3G26890.5); Has 1807 Blast hits to 1807 proteins in 277 species: Archae - 0; Bacteria - 0; Metazoa - 736; Fungi - 347; Plants - 385; Viruses - 0; Other Eukaryotes - 339 (source: NCBI BLink).	34.47	1e-26
	4	UN006765	-1.25566	1	-5.26327	0.0424534	1.16924	1	-2.73498	1		AT1G06470.1	---	Nucleotide/sugar transporter family protein	67.4	2e-153
	4	UN008602	-2.57677	0.0962642	-3.67976	8.49648e-06	-0.57844	1	-2.11227	1		AT1G75450.1	CKX5, ATCKX5, ATCKX6	cytokinin oxidase 5	52.27	5e-18
	4	UN025482	-1.75939	0.0659365	-2.42778	0.00947943	-0.983992	1	-1.46474	1		AT4G11140.1	CRF1	cytokinin response factor 1	82.22	1e-19
	4	UN026979	-1.37002	1	-1.92723	1	0.126114	1	-1.34884	0.0207843		AT1G32070.2	ATNSI, NSI	nuclear shuttle interacting	87.72	2e-32
	4	UN031545	-1.38676	1	-2.51098	1	1.08468	1	-1.88565	0.000488219		AT5G23450.3	ATLCBK1, LCBK1	long-chain base (LCB) kinase 1	46.58	1e-25
	4	UN015394	-1.6212	0.487915	-0.658126	1	0.623391	1	-1.90656	0.0422447		AT3G50530.2	CRK	CDPK-related kinase	76.96	0
	4	UN004764	-1.20518	0.39221	-0.881919	1	0.407626	1	-1.05436	0.0429891		AT1G50420.1	SCL3, SCL-3	scarecrow-like 3	64.58	4e-117
	4	UN033343	-2.16519	0.0325503	-1.83206	1	0.841056	1	-2.14928	1		AT3G54420.1	ATEP3, ATCHITIV, CHIV, EP3	homolog of carrot EP3-3 chitinase	53.47	2e-71
	4	UN038368	-1.28993	0.0180194	-1.01105	0.362158	0.151688	1	-0.931812	1		AT2G36530.1	LOS2, ENO2	Enolase	83.33	1e-84
	4	UN018851	-0.964958	1	-0.460944	1	1.00211	1	-1.21011	0.0397059		AT1G04010.1	PSAT1, ATPSAT1	phospholipid sterol acyl transferase 1	73	0
	4	UN039609	-3.07944	0.00350081	0.464612	1	2.01504	0.00656089	---	---		AT1G19530.1	---	unknown protein; FUNCTIONS IN: molecular_function unknown; INVOLVED IN: N-terminal protein myristoylation, anaerobic respiration; LOCATED IN: cellular_component unknown; EXPRESSED IN: leaf apex, inflorescence meristem, hypocotyl, root, flower; EXPRESSED DURING: petal differentiation and expansion stage; Has 47 Blast hits to 47 proteins in 13 species: Archae - 0; Bacteria - 0; Metazoa - 0; Fungi -…	36.09	4e-12
	4	UN035222	-0.803218	1	-1.73295	1	-1.89188	0.0217427	-0.924765	1		AT4G17030.1	ATEXLB1, EXPR, AT-EXPR, ATEXPR1, ATHEXP BETA 3.1, EXLB1	expansin-like B1	54.69	1e-77
	4	UN027751	-1.18803	0.941121	-1.79408	0.219539	-2.93389	2.86338e-05	0.925196	1		AT5G23280.1	---	TCP family transcription factor	59.3	9e-59
	4	UN033233	-1.56067	0.762414	-1.66764	1	-3.51939	0.00497673	-0.236306	1		AT5G06720.1	ATPA2, PA2	peroxidase 2	70	2e-122
	4	UN002434	-1.41381	0.557005	-1.10484	1	-2.15295	0.0211451	0.547676	1		AT4G34980.1	SLP2	subtilisin-like serine protease 2	72.62	0
	4	UN007747	-1.06979	0.835956	-1.07033	1	-2.00315	0.00274669	0.482126	1		AT1G25510.1	---	Eukaryotic aspartyl protease family protein	60.76	0
	4	UN014503	-1.18625	0.638953	-0.877031	1	-2.08054	0.00568157	0.111867	1		AT1G58100.1	---	TCP family transcription factor	89.86	1e-36
	4	UN040271	-2.93646	0.0168575	-1.72331	1	-4.63987	0.738147	0.514185	1		AT1G72060.1	---	serine-type endopeptidase inhibitors	51.52	1e-16
	4	UN008859	-1.75447	0.00509086	-0.604021	1	-1.48818	0.0274039	-0.454853	1		AT5G06390.1	FLA17	FASCICLIN-like arabinogalactan protein 17 precursor	69.11	0
	4	UN010314	-1.4341	0.000902828	-0.580699	1	-1.2633	0.0117215	-0.390778	1		---	---	---	---	---
	4	UN022427	-3.52036	1.17105e-06	-0.781925	1	-2.92661	0.478598	-1.28527	1		---	---	---	---	---
	4	UN009460	-1.26281	0.258865	-0.465535	1	-1.39891	0.0422791	-0.580264	0.93893		AT4G16490.1	---	ARM repeat superfamily protein	61.84	3e-158
	4	UN020944	-2.22222	0.161146	-0.746629	1	-2.41916	0.00814816	-1.11227	1		AT5G05340.1	---	Peroxidase superfamily protein	65.67	2e-145
	4	UN031873	-2.25726	0.000223236	-0.763912	1	-2.27304	0.268906	-1.01833	1		AT4G08685.1	SAH7	Pollen Ole e 1 allergen and extensin family protein	57.69	3e-62
	4	UN007970	-1.34668	0.00436155	-0.23471	1	-1.02251	0.20281	-0.262101	1		AT2G46550.1	---	unknown protein; BEST Arabidopsis thaliana protein match is: unknown protein (TAIR:AT1G01240.3); Has 72 Blast hits to 68 proteins in 13 species: Archae - 0; Bacteria - 0; Metazoa - 1; Fungi - 0; Plants - 71; Viruses - 0; Other Eukaryotes - 0 (source: NCBI BLink).	47.06	6e-09
	4	UN006004	-1.56643	0.000204545	-0.39589	1	-1.18864	0.0722693	-0.259331	1		AT1G76490.1	HMG1, HMGR1, AtHMGR1	hydroxy methylglutaryl CoA reductase 1	74.23	0
	4	UN011537	-2.49248	0.0122307	-0.682137	1	-1.97858	0.378229	-0.470456	1		AT4G00050.1	UNE10	basic helix-loop-helix (bHLH) DNA-binding superfamily protein	48.62	4e-64
	4	UN009042	-1.97215	2.65025e-05	-0.595635	1	-1.85529	0.0161479	-0.178786	1		AT5G51550.1	EXL3	EXORDIUM like 3	75.39	7e-172
	4	UN035241	-4.73285	1.01648e-09	-1.27475	1	-3.63759	0.22573	-0.34685	1		AT2G14900.1	---	Gibberellin-regulated family protein	79.59	5e-24
	4	UN032301	-1.73629	0.0307229	0.0892703	1	-1.60702	0.358409	-0.0355473	1		AT2G47930.1	AGP26, ATAGP26	arabinogalactan protein 26	51.39	8e-07
	4	UN013381	-1.56614	0.017465	-0.194763	1	-1.80761	0.0609902	-0.140602	1		AT4G22880.1	LDOX, TDS4, TT18, ANS	leucoanthocyanidin dioxygenase	70.43	0
	4	UN017274	-1.47056	0.00282056	-0.294344	1	-1.64267	0.00887355	-0.391218	1		AT5G42800.1	DFR, TT3, M318	dihydroflavonol 4-reductase	67.49	2e-160
	4	UN028857	-1.25462	0.414644	-0.395892	1	-1.72362	0.0263018	-0.177768	1		AT5G01015.1	---	unknown protein; FUNCTIONS IN: molecular_function unknown; INVOLVED IN: biological_process unknown; LOCATED IN: endomembrane system; EXPRESSED IN: 23 plant structures; EXPRESSED DURING: 13 growth stages; BEST Arabidopsis thaliana protein match is: unknown protein (TAIR:AT1G65295.1); Has 30201 Blast hits to 17322 proteins in 780 species: Archae - 12; Bacteria - 1396; Metazoa - 17338; Fungi - 3422;…	51.28	3e-22
	4	UN043692	-1.59114	0.00587729	-0.362811	1	-2.1953	0.0661335	-0.392688	1		AT5G13930.1	CHS, TT4, ATCHS	Chalcone and stilbene synthase family protein	80.77	8e-93
	4	UN004823	-1.63954	0.247097	-1.67848	1	-2.30188	0.00107487	0.262134	1		AT3G14240.1	---	Subtilase family protein	71.57	7e-145
	4	UN008206	-6.65735	6.68073e-07	-6.27919	0.74608	-6.30482	0.400548	-0.0705787	1		AT4G30370.1	---	RING/U-box superfamily protein	52.05	1e-20
	4	UN022468	-2.80251	1	-1.82606	1	-2.82643	0.00711343	-0.853004	0.833755		AT3G22810.1	---	Plant protein of unknown function (DUF828) with plant pleckstrin homology-like region	66.42	1e-94
	4	UN016846	-1.9844	0.00254234	-1.27549	1	-1.84016	0.0383957	-0.364198	1		AT5G53420.1	---	CCT motif family protein	47.5	6e-72
	4	UN025044	-3.82962	0.180432	-2.64584	1	-3.78533	0.0232691	-0.793346	1		AT5G57560.1	TCH4, XTH22	Xyloglucan endotransglucosylase/hydrolase family protein	66.54	2e-133
	4	UN019505	-1.39452	0.00177441	-0.809103	1	-1.99479	0.011713	-0.367094	1		AT3G12500.1	ATHCHIB, PR3, PR-3, CHI-B, B-CHI, HCHIB	basic chitinase	67.22	1e-146
	4	UN036955	-4.75613	0.000644283	-3.64202	1	-6.75637	0.0188532	-1.23637	1		AT5G14920.1	---	Gibberellin-regulated family protein	62.9	5e-20
	4	UN010063	-2.22486	0.000675117	-1.26788	1	-2.55971	0.0181138	-0.255394	1		AT4G16563.1	---	Eukaryotic aspartyl protease family protein	63.47	3e-60
	4	UN037624	-3.32425	0.0201718	-2.26288	1	-3.91301	1	0.172635	1		AT5G53420.1	---	CCT motif family protein	39.82	2e-24
	4	UN010038	-2.21426	2.13905e-05	-0.673324	1	-1.51495	0.0598081	0.42074	1		AT3G49220.1	---	Plant invertase/pectin methylesterase inhibitor superfamily	69.44	0
	4	UN017058	-1.66227	0.0370047	-0.484479	1	-0.889371	1	0.279392	1		AT4G12110.1	SMO1-1, ATSMO1, ATSMO1-1	sterol-4alpha-methyl oxidase 1-1	69.75	5e-154
	4	UN009339	-2.27231	0.0333218	-0.437756	1	-1.76233	0.952495	0.435204	1		AT1G24540.1	CYP86C1	cytochrome P450, family 86, subfamily C, polypeptide 1	55.3	5e-133
	4	UN015630	-3.78367	0.000313732	-0.658347	1	-2.79612	0.636377	0.44349	1		AT5G06610.1	---	Protein of unknown function (DUF620)	56.2	4e-141
	4	UN019802	-1.58817	0.00723511	-0.485391	1	-1.37276	0.054333	0.257418	1		AT4G14960.2	TUA6	Tubulin/FtsZ family protein	98.55	0
	4	UN020125	-1.36261	0.0459122	-0.39583	1	-1.45145	0.341164	0.0771178	1		AT2G34770.1	FAH1, ATFAH1	fatty acid hydroxylase 1	73.62	3e-120
	4	UN025456	-2.00062	0.000141735	-0.930656	1	-1.85891	0.253586	0.44349	1		AT3G23820.1	GAE6	UDP-D-glucuronate 4-epimerase 6	79.4	0
	4	UN026162	-1.5997	9.16434e-05	-0.784935	1	-1.68334	0.0274247	0.124642	1		AT2G15220.1	---	Plant basic secretory protein (BSP) family protein	58.82	5e-93
	4	UN003930	-0.990484	0.0217861	-0.597929	1	-0.650798	0.660469	-0.0709027	1		AT4G16370.1	ATOPT3, OPT3	oligopeptide transporter	80.63	0
	4	UN027388	-2.66354	0.00064947	-1.51244	1	-1.63298	0.954037	-0.0872225	1		AT4G17870.1	PYR1, RCAR11	Polyketide cyclase/dehydrase and lipid transport superfamily protein	66.3	2e-82
	4	UN012471	-3.43172	0.0396114	-1.8539	1	-2.80488	1	-0.486794	1		AT2G16660.1	---	Major facilitator superfamily protein	66.98	0
	4	UN018881	-2.44686	0.00365602	-1.25616	1	-1.90166	0.232108	-0.169174	1		AT1G49030.1	---	PLAC8 family protein	62.32	9e-56
	4	UN039425	-2.35865	0.0296971	-1.29829	1	-1.70042	1	-0.108172	1		AT5G15350.1	ENODL17, AtENODL17	early nodulin-like protein 17	40.17	7e-29
	4	UN013953	-2.37638	0.00203383	-0.86675	1	-1.53533	0.356178	-0.290144	1		AT4G29360.1	---	O-Glycosyl hydrolases family 17 protein	40.22	2e-108
	4	UN040499	-4.53592	6.25068e-27	-2.0452	0.352088	-2.86079	0.787394	-0.54532	1		AT2G18420.1	---	Gibberellin-regulated family protein	75	5e-17
	4	UN015633	-2.2976	0.0179345	-1.16828	1	-1.52456	0.717822	0.577559	1		---	---	---	---	---
	4	UN037210	-1.85286	0.000914682	-1.11749	0.48455	-1.32614	0.291469	0.44349	1		AT1G60950.1	FED A, ATFD2	2Fe-2S ferredoxin-like superfamily protein	72.39	2e-51
	4	UN020305	-1.9095	0.014669	-1.12078	1	-1.29845	1	0.124682	1		AT5G03650.1	SBE2.2	starch branching enzyme 2.2	55.08	2e-133
	4	UN043918	-2.6875	0.0338364	-1.68206	1	-2.12376	0.81727	0.281434	1		AT4G33550.1	---	Bifunctional inhibitor/lipid-transfer protein/seed storage 2S albumin superfamily protein	30.91	1e-07
	4	UN009047	-3.67532	0.0434436	-2.70273	1	-0.863882	1	-1.96026	1		AT1G76160.1	sks5	SKU5 similar 5	80.08	0
	4	UN007531	-2.18045	8.39368e-05	-2.01721	0.0229637	-1.06944	1	-1.04505	1		AT2G16660.1	---	Major facilitator superfamily protein	81.36	5e-88
	4	UN016965	-2.75343	0.0479574	-1.91185	1	-1.12499	1	-1.13916	0.366066		AT2G36870.1	XTH32	xyloglucan endotransglucosylase/hydrolase 32	76.17	4e-159
	4	UN012670	-1.50857	0.00135012	-1.02999	0.716482	-0.778537	0.657721	-0.798203	1		AT5G48300.1	ADG1, APS1	ADP glucose pyrophosphorylase 1	89.33	0
	4	UN023966	-2.25802	0.0117288	-1.51204	1	-1.09809	0.976513	-1.35785	1		AT5G20700.1	---	Protein of unknown function (DUF581)	47.95	5e-17
	4	UN006762	-2.95045	1.39847e-10	-1.51854	0.37177	-1.6435	0.00440273	-1.37381	0.111406		AT5G53370.1	ATPMEPCRF, PMEPCRF	pectin methylesterase PCR fragment F	61.3	0
	4	UN009863	-1.42416	0.0215852	-0.630936	1	-0.934199	1	-0.446206	1		AT1G33540.1	scpl18	serine carboxypeptidase-like 18	49.46	4e-93
	4	UN025010	-1.31066	0.034498	-0.45956	1	-0.68982	0.942802	-0.332143	1		AT2G22170.1	---	Lipase/lipooxygenase, PLAT/LH2 family protein	66.13	5e-61
	4	UN005242	-3.52858	0.00718264	-1.68938	1	-1.65656	1	-0.489233	1		AT5G14230.1	---	CONTAINS InterPro DOMAIN/s: Ankyrin repeat-containing domain (InterPro:IPR020683), Ankyrin repeat (InterPro:IPR002110); BEST Arabidopsis thaliana protein match is: XB3 ortholog 2 in Arabidopsis thaliana (TAIR:AT5G57740.1); Has 66374 Blast hits to 25358 proteins in 1201 species: Archae - 121; Bacteria - 8133; Metazoa - 29530; Fungi - 5885; Plants - 3349; Viruses - 785; Other Eukaryotes - 18571 (so…	63.08	0
	4	UN011158	-5.03445	0.0032191	-1.91333	1	-1.88836	0.237607	-1.18207	1		AT1G79720.1	---	Eukaryotic aspartyl protease family protein	54.73	3e-164
	4	UN019944	-3.54029	3.90778e-07	-1.69954	0.453032	-1.30233	0.809353	-1.13087	0.50073		AT5G57560.1	TCH4, XTH22	Xyloglucan endotransglucosylase/hydrolase family protein	71.86	1e-143
	4	UN017289	-1.96423	0.000392559	-0.773629	1	-0.843642	1	-0.789874	1		AT4G39840.1	---	unknown protein; FUNCTIONS IN: molecular_function unknown; INVOLVED IN: biological_process unknown; LOCATED IN: endomembrane system; EXPRESSED IN: 23 plant structures; EXPRESSED DURING: 13 growth stages; Has 20719 Blast hits to 6096 proteins in 607 species: Archae - 22; Bacteria - 3243; Metazoa - 4364; Fungi - 2270; Plants - 237; Viruses - 128; Other Eukaryotes - 10455 (source: NCBI BLink).	62.23	2e-89
	4	UN019835	-3.24929	0.00285636	-1.40384	1	-1.25932	1	-1.39261	1		AT5G06860.1	PGIP1, ATPGIP1	polygalacturonase inhibiting protein 1	63.16	1e-135
	4	UN021586	-2.39822	0.00227308	-0.919721	1	-1.0401	0.585168	-0.795328	1		AT1G80730.1	ZFP1, ATZFP1	zinc-finger protein 1	47.19	5e-20
	4	UN028466	-3.31163	0.00134827	-1.35574	1	-1.28261	1	-1.12446	1		AT5G64530.1	ANAC104, XND1	xylem NAC domain 1	57.07	7e-70
	4	UN020332	-2.94984	9.69084e-14	-0.47451	1	-1.43078	0.0935065	-1.0886	1		AT4G17670.1	---	Protein of unknown function (DUF581)	44.58	2e-29
	4	UN019877	-4.70847	4.01024e-23	-0.407358	1	-2.07454	1	-1.55838	0.0449375		AT1G43800.1	---	Plant stearoyl-acyl-carrier-protein desaturase family protein	77.58	0
	4	UN022600	-2.69666	2.37589e-05	-0.283882	1	-1.17412	1	-0.879793	1		AT2G44370.1	---	Cysteine/Histidine-rich C1 domain family protein	35.71	7e-35
	4	UN023764	-3.40059	0.00937571	-0.713545	1	-1.12484	1	-1.14055	1		AT2G27660.1	---	Cysteine/Histidine-rich C1 domain family protein	51.08	2e-55
	4	UN025758	-2.89143	1.30716e-06	-0.0565003	1	-1.7157	0.987569	-1.62057	0.983284		AT5G48540.1	---	receptor-like protein kinase-related family protein	52.21	1e-81
	4	UN022690	-1.59643	0.00859604	-0.181296	1	-0.731299	1	-1.06626	1		AT1G75780.1	TUB1	tubulin beta-1 chain	96.59	0
	4	UN039292	-4.46783	0.00023534	-0.635074	1	-1.86562	0.162606	-2.7529	1		AT5G25940.1	---	early nodulin-related	67.44	4e-14
	4	UN018154	-6.25893	8.75934e-05	-2.32375	1	-3.29847	1	-3.78571	0.00170471		AT5G33340.1	CDR1	Eukaryotic aspartyl protease family protein	42.37	2e-77
	4	UN010950	-2.13158	3.56336e-06	-1.01084	1	-1.56581	1	-1.48151	1		AT5G20190.1	---	Tetratricopeptide repeat (TPR)-like superfamily protein	73	4e-51
	4	UN022765	-2.32577	0.00910516	-0.740352	1	-1.58394	0.737961	-1.71776	1		AT2G04780.1	FLA7	FASCICLIN-like arabinoogalactan 7	68.87	1e-75
	4	UN008876	-1.99296	0.00100719	-0.504459	1	-0.581669	1	-1.26599	0.10893		AT4G12420.1	SKU5	Cupredoxin superfamily protein	72.59	0
	4	UN019401	-3.62511	0.000185828	-1.39825	1	-1.05964	1	-2.35247	0.0592652		AT2G02990.1	RNS1, ATRNS1	ribonuclease 1	70.44	4e-111
	4	UN006512	-2.16617	0.00333486	-1.22695	1	-0.838277	1	-1.68934	0.207134		AT1G12110.1	NRT1.1, CHL1-1, NRT1, B-1, ATNRT1, CHL1	nitrate transporter 1.1	64.41	0
	4	UN045422	-1.23709	0.0163863	-0.676176	1	-0.568786	1	-0.986422	1		AT1G50010.1	TUA2	tubulin alpha-2 chain	98.1	7e-115
	4	UN013134	-1.79693	0.00368221	-1.58968	0.0175591	-1.40011	0.0169407	-1.79034	1		AT4G13940.1	HOG1, EMB1395, SAHH1, MEE58, ATSAHH1	S-adenosyl-L-homocysteine hydrolase	89.9	0
	4	UN016563	-1.9727	0.0164552	-1.61855	1	-2.43689	0.257699	-1.49233	1		AT3G20820.1	---	Leucine-rich repeat (LRR) family protein	66.47	2e-160
	4	UN004766	-1.56997	0.0489254	-1.26015	1	-1.61315	0.163372	-2.27347	1		AT1G48480.1	RKL1	receptor-like kinase 1	60.2	0
	4	UN011470	-2.35022	1	-0.652457	1	-2.22257	1	-2.45651	9.32685e-05		AT3G24740.1	---	Protein of unknown function (DUF1644)	55.38	5e-63
	4	UN025705	-2.30668	1	---	---	---	---	-2.25439	3.68573e-06		AT2G30970.1	ASP1	aspartate aminotransferase 1	82.09	9e-171
	4	UN080026	-2.18725	0.210874	-1.67872	0.51156	-1.70668	0.0303505	---	---		AT3G52590.1	UBQ1, EMB2167, ERD16, HAP4	ubiquitin extension protein 1	98.7	2e-51
	4	UN009279	-6.87227	2.75487e-07	---	---	---	---	-0.294476	1		AT1G33170.1	---	S-adenosyl-L-methionine-dependent methyltransferases superfamily protein	70.43	0
	5	UN010217	0.606763	1	0.281888	1	-0.118034	1	-7.00144	2.99638e-06		---	---	---	---	---
	5	UN008492	0.86924	1	0.769851	1	-0.232951	1	-1.86257	0.0267146		AT5G66520.1	---	Tetratricopeptide repeat (TPR)-like superfamily protein	45.22	0
	5	UN013341	0.300242	1	1.4003	0.000125575	-0.148662	1	-2.18032	1		AT3G61490.1	---	Pectin lyase-like superfamily protein	67.26	0
	5	UN029348	0.737853	1	1.30975	1	-0.440145	1	-2.37183	0.00718149		AT1G28510.1	---	Optic atrophy 3 protein (OPA3)	63.46	2e-50
	5	UN002275	0.618576	1	1.99438	1	-0.438905	1	-5.74505	0.0158007		AT5G04460.1	---	RING/U-box superfamily protein	60.8	0
	5	UN005949	0.662762	1	1.8279	1	-1.0267	1	-6.59011	6.96568e-05		AT2G19260.1	---	RING/FYVE/PHD zinc finger superfamily protein	44.19	2e-58
	5	UN004431	0.460459	1	0.829455	1	-0.0711629	1	-3.04786	0.0411885		AT5G17660.1	---	tRNA (guanine-N-7) methyltransferase	44.04	6e-42
	5	UN016906	0.208425	1	0.672292	1	0.0887002	1	-2.05092	0.0418321		AT3G43220.1	---	Phosphoinositide phosphatase family protein	55.05	8e-101
	5	UN011381	-0.00935548	1	0.500648	1	-0.185791	1	-2.31621	0.0141235		AT3G19260.1	LAG1 HOMOLOG 2, LOH2	LAG1 homologue 2	67.07	3e-126
	5	UN020525	0.209892	1	0.681576	1	0.0802398	1	-2.86713	0.0348959		AT2G43945.1	---	unknown protein; LOCATED IN: chloroplast; BEST Arabidopsis thaliana protein match is: unknown protein (TAIR:AT3G59870.1); Has 292 Blast hits to 292 proteins in 84 species: Archae - 0; Bacteria - 122; Metazoa - 0; Fungi - 0; Plants - 46; Viruses - 0; Other Eukaryotes - 124 (source: NCBI BLink).	83.77	2e-120
	5	UN016648	0.384215	1	1.01216	1	-0.105498	1	-5.76828	0.0140157		AT1G79430.2	APL, WDY	Homeodomain-like superfamily protein	67	7e-88
	5	UN026232	0.123146	1	0.30027	1	-0.0674712	1	-1.66316	5.49307e-05		AT5G54750.2	---	Transport protein particle (TRAPP) component	83.07	4e-115
	5	UN020060	0.38219	1	0.688561	1	-0.464315	1	-1.99642	5.14153e-05		AT1G65290.1	mtACP2	mitochondrial acyl carrier protein 2	71.32	1e-56
	5	UN016582	0.65636	0.670473	0.527735	1	-0.684035	0.759544	-2.34406	6.20136e-11		AT2G33590.1	---	NAD(P)-binding Rossmann-fold superfamily protein	64.13	4e-132
	5	UN021236	1.13204	0.00162866	0.840157	0.581065	-0.862647	0.435237	-4.01629	0.958053		AT3G62420.1	ATBZIP53, BZIP53	basic region/leucine zipper motif 53	59.52	8e-50
	5	UN022885	1.19406	0.0198691	0.882922	1	-0.13926	1	-5.49773	0.429742		AT4G35320.1	---	unknown protein; BEST Arabidopsis thaliana protein match is: unknown protein (TAIR:AT2G17300.1); Has 30201 Blast hits to 17322 proteins in 780 species: Archae - 12; Bacteria - 1396; Metazoa - 17338; Fungi - 3422; Plants - 5037; Viruses - 0; Other Eukaryotes - 2996 (source: NCBI BLink).	56.94	8e-26
	5	UN012102	0.332429	1	0.219934	1	-0.174779	1	-1.64543	0.000355509		AT3G61140.1	FUS6, ATFUS6, CSN1, COP11, EMB78, ATSK31, SK31	26S proteasome, regulatory subunit Rpn7;Proteasome component (PCI) domain	71.97	0
	5	UN028754	1.59394	0.234333	0.820513	0.572825	-0.646173	0.87924	-7.37724	1.02549e-08		AT3G60280.1	UCC3	uclacyanin 3	54.74	3e-33
	5	UN029789	0.717209	1	0.690859	1	-0.310711	1	-2.77282	0.000250669		AT2G30410.1	KIS, TFCA	tubulin folding cofactor A (KIESEL)	75.93	6e-57
	5	UN020192	1.49075	0.000365222	1.25305	0.0769893	-0.566095	0.967454	-4.51826	0.585848		AT3G02520.1	GRF7, GF14 NU	general regulatory factor 7	86.54	4e-165
	5	UN011859	2.16817	0.259024	0.0583962	1	0.490158	1	-2.59108	0.00676851		AT1G73805.1	---	Calmodulin binding protein-like	52.68	7e-134
	5	UN005446	3.03821	1	0.16978	1	0.890848	1	-4.7212	3.81945e-05		AT2G36240.1	---	pentatricopeptide (PPR) repeat-containing protein	55.72	7e-161
	5	UN020627	1.68933	0.0494189	0.010281	1	0.329432	1	-2.41914	1		AT5G60900.1	RLK1	receptor-like protein kinase 1	39.07	2e-101
	5	UN004184	1.20817	0.00398204	0.331474	1	0.581512	1	-2.5805	1		AT2G02870.1	---	Galactose oxidase/kelch repeat superfamily protein	56.84	3e-175
	5	UN015470	2.0334	2.45671e-05	0.974426	1	0.182529	1	-5.10336	1		AT1G74320.1	---	Protein kinase superfamily protein	67.87	3e-177
	5	UN031322	1.56876	0.108646	0.322726	1	0.284128	1	-3.56139	3.31162e-06		---	---	---	---	---
	5	UN004277	2.07946	5.25972e-09	0.344509	1	-0.029226	1	-3.6487	1		AT5G60600.1	GCPE, ISPG, CSB3, CLB4, HDS	4-hydroxy-3-methylbut-2-enyl diphosphate synthase	83.71	0
	5	UN017357	1.13416	0.00383275	0.623884	1	-0.198014	1	-2.17734	0.274744		AT4G35550.1	HB-4, WOX13, ATWOX13	WUSCHEL related homeobox 13	51.49	2e-76
	5	UN019109	1.19281	0.0141059	0.713758	1	-0.0507096	1	-2.51789	1		---	---	---	---	---
	5	UN027505	1.06153	0.517937	0.730551	1	0.0667247	1	-2.40983	1.55218e-05		AT2G35658.2	---	unknown protein; FUNCTIONS IN: molecular_function unknown; INVOLVED IN: biological_process unknown; LOCATED IN: cellular_component unknown; BEST Arabidopsis thaliana protein match is: unknown protein (TAIR:AT4G16840.1); Has 30201 Blast hits to 17322 proteins in 780 species: Archae - 12; Bacteria - 1396; Metazoa - 17338; Fungi - 3422; Plants - 5037; Viruses - 0; Other Eukaryotes - 2996 (source: NC…	44.58	6e-15
	5	UN008326	1.67854	0.040312	0.789348	1	-0.101308	1	-2.96443	1		AT5G05580.1	FAD8	fatty acid desaturase 8	68.55	0
	5	UN011757	---	---	1.87123	1	-0.212777	1	-7.61328	1.86748e-09		AT5G01510.1	RUS5	Protein of unknown function, DUF647	58.12	3e-92
	5	UN036579	1.62755	8.18846e-05	0.725513	1	-0.00048865	1	-2.8778	1		AT3G12580.1	HSP70, ATHSP70	heat shock protein 70	75.23	1e-45
	5	UN005368	1.09239	0.132567	1.35316	0.0159574	0.580718	0.932945	-2.56327	1		AT5G24800.1	ATBZIP9, BZO2H2, BZIP9	basic leucine zipper 9	44.54	5e-47
	5	UN020506	1.72838	0.0135155	1.47382	1	0.900577	0.841343	-3.35766	1		AT4G25700.1	BETA-OHASE 1, B1, chy1, BCH1	beta-hydroxylase 1	73.18	6e-131
	5	UN020618	1.08554	0.0235677	0.97683	0.648114	0.440418	1	-1.63358	0.267558		AT1G01490.1	---	Heavy metal transport/detoxification superfamily protein	88.89	4e-17
	5	UN008302	1.61367	1	1.38942	1	0.299139	1	-2.86031	1.48993e-08		AT5G61930.1	APO3	Arabidopsis thaliana protein of unknown function (DUF794)	44.91	5e-108
	5	UN013402	1.59623	0.00593611	0.815291	1	0.239346	1	-2.33099	1		AT4G21490.1	NDB3	NAD(P)H dehydrogenase B3	66.98	0
	5	UN003257	1.16601	0.0111704	0.749822	1	0.328887	1	-1.82489	1		AT3G57520.1	AtSIP2, SIP2	seed imbibition 2	77.68	0
	5	UN027038	1.86001	0.001115	1.22848	0.386123	0.636447	1	-2.83477	1		AT2G29420.1	ATGSTU7, GST25, GSTU7	glutathione S-transferase tau 7	46.73	5e-66
	5	UN004492	2.44601	0.0375247	0.989123	1	0.934354	0.940768	-3.13968	1		AT5G67550.1	---	unknown protein; FUNCTIONS IN: molecular_function unknown; INVOLVED IN: biological_process unknown; LOCATED IN: endomembrane system; EXPRESSED IN: flower; EXPRESSED DURING: 4 anthesis; BEST Arabidopsis thaliana protein match is: unknown protein (TAIR:AT1G71110.1); Has 161 Blast hits to 154 proteins in 16 species: Archae - 0; Bacteria - 0; Metazoa - 0; Fungi - 0; Plants - 161; Viruses - 0; Other E…	31.92	1e-72
	5	UN019415	---	---	0.347543	1	0.245207	1	-1.95652	0.0448433		AT2G45510.1	CYP704A2	cytochrome P450, family 704, subfamily A, polypeptide 2	65.57	0
	5	UN025026	1.96509	0.0240753	1.46145	1	1.48603	1	-3.24259	1		AT4G01410.1	---	Late embryogenesis abundant (LEA) hydroxyproline-rich glycoprotein family	51.08	3e-49
	5	UN010332	1.06703	0.00231507	1.3256	0.209378	-0.120156	1	-1.71497	0.00875608		AT5G65980.1	---	Auxin efflux carrier family protein	52.17	5e-73
	5	UN019707	3.17436	7.19559e-06	-0.207398	1	2.16207	1	-2.58746	0.579507		AT3G01680.1	---	CONTAINS InterPro DOMAIN/s: Mediator complex subunit Med28 (InterPro:IPR021640); BEST Arabidopsis thaliana protein match is: unknown protein (TAIR:AT3G01670.1); Has 122 Blast hits to 112 proteins in 13 species: Archae - 0; Bacteria - 0; Metazoa - 0; Fungi - 0; Plants - 122; Viruses - 0; Other Eukaryotes - 0 (source: NCBI BLink).	43.9	1e-111
	5	UN013386	1.29101	0.0116382	0.0712463	1	0.870941	0.808183	-1.5194	1		AT1G23710.1	---	Protein of unknown function (DUF1645)	41.77	2e-47
	5	UN048105	2.24476	0.0299637	-0.237615	1	0.93938	1	-2.28747	1		---	---	---	---	---
	5	UN003548	-0.116601	1	0.617334	1	2.01394	7.06792e-06	-2.32536	1		AT4G15560.1	CLA1, DEF, CLA, DXS, DXPS2	Deoxyxylulose-5-phosphate synthase	87.12	0
	5	UN006542	0.306295	1	0.589468	1	1.58887	1	-1.47169	0.0313935		AT5G40400.1	---	Pentatricopeptide repeat (PPR) superfamily protein	50.35	0
	5	UN008301	0.628603	0.47174	0.370244	1	1.31672	0.0308502	-1.3753	1		AT4G11070.1	WRKY41, AtWRKY41	WRKY family transcription factor	42.63	3e-51
	5	UN020370	0.919381	1	1.05983	1	2.30617	1	-2.25297	2.77261e-05		---	---	---	---	---
	5	UN004543	0.327406	1	0.0126704	1	1.64157	0.0407619	-1.68231	1		AT1G52570.1	PLDALPHA2	phospholipase D alpha 2	54.67	2e-130
	5	UN006739	0.426032	1	0.215712	1	2.18812	0.0110027	-2.4646	0.172138		AT5G38510.1	---	Rhomboid-related intramembrane serine protease family protein	43.6	1e-99
	5	UN009620	0.786828	1	0.426769	1	2.87288	0.00568224	-3.26056	1		AT5G48930.1	HCT	hydroxycinnamoyl-CoA shikimate/quinate hydroxycinnamoyl transferase	32.59	8e-62
	5	UN018872	0.415299	1	-0.565173	1	2.66537	0.0372371	-4.02729	0.934025		AT5G24610.1	---	unknown protein; BEST Arabidopsis thaliana protein match is: unknown protein (TAIR:AT3G49550.1); Has 1807 Blast hits to 1807 proteins in 277 species: Archae - 0; Bacteria - 0; Metazoa - 736; Fungi - 347; Plants - 385; Viruses - 0; Other Eukaryotes - 339 (source: NCBI BLink).	63.27	3e-64
	5	UN022799	0.426653	1	-0.0871792	1	1.21115	1	-1.89588	0.0243141		AT3G16000.1	MFP1	MAR binding filament-like protein 1	40.96	3e-23
	5	UN025933	-0.364101	1	-0.440298	1	2.12379	1.88602e-05	-2.37666	1		AT3G04720.1	PR4, HEL, PR-4	pathogenesis-related 4	77.5	8e-67
	5	UN006237	0.178169	1	-0.577403	1	1.44778	0.775583	-1.77221	0.04484		AT4G18390.1	TCP2	TEOSINTE BRANCHED 1, cycloidea and PCF transcription factor 2	38.64	9e-33
	5	UN021172	0.305181	1	-0.402077	1	1.41137	1	-1.43862	0.0190952		AT2G19130.1	---	S-locus lectin protein kinase family protein	67.5	9e-129
	5	UN032518	0.762847	1	---	---	1.2352	1	-3.84714	3.516e-09		AT2G46130.1	WRKY43, ATWRKY43	WRKY DNA-binding protein 43	75.25	3e-57
	5	UN004757	1.35101	1	0.287075	1	1.85282	1	-3.57457	0.012836		AT2G33540.1	CPL3, ATCPL3	C-terminal domain phosphatase-like 3	56.61	0
	5	UN039704	2.30197	1	0.890733	1	3.7122	1	-5.56907	1.02312e-28		AT1G34300.1	---	lectin protein kinase family protein	30.26	4e-14
	5	UN012563	0.398277	1	0.561178	1	0.578219	0.944828	-1.33324	0.0451672		AT3G54020.1	AtIPCS1	Arabidopsis Inositol phosphorylceramide synthase 1	71.43	2e-162
	5	UN038235	0.369556	1	0.78152	1	1.28015	1	-2.17959	0.00252457		AT2G02850.1	ARPN	plantacyanin	61.76	2e-41
	5	UN033375	1.10651	1	1.32681	1	1.89026	1	-3.13842	0.00646494		---	---	---	---	---
	5	UN040527	1.1931	1	---	---	2.25132	1	-3.41457	0.046391		AT1G56110.1	NOP56	homolog of nucleolar protein NOP56	64	7e-53
	5	UN006973	1.05104	0.00554169	0.112376	1	1.57502	0.000158204	-1.79034	1		AT4G26850.1	VTC2	mannose-1-phosphate guanylyltransferase (GDP)s;GDP-galactose:mannose-1-phosphate guanylyltransferases;GDP-galactose:glucose-1-phosphate guanylyltransferases;GDP-galactose:myoinositol-1-phosphate guanylyltransferases;glucose-1-phosphate guanylyltransferase	70.02	0
	5	UN008014	1.21831	0.665814	0.122309	1	1.70238	0.0117215	-1.808	1		AT5G48570.1	ROF2, ATFKBP65, FKBP65	FKBP-type peptidyl-prolyl cis-trans isomerase family protein	52.6	4e-179
	5	UN016662	1.13961	0.393766	0.279813	1	1.7623	0.00234672	-1.56811	0.858274		AT4G16260.1	---	Glycosyl hydrolase superfamily protein	55.49	5e-116
	5	UN020425	1.66736	1	---	---	---	---	-2.92223	8.72513e-07		AT1G04560.1	---	AWPM-19-like family protein	67.5	8e-46
	5	UN004096	2.06334	0.646987	-1.25121	1	-2.12165	0.876535	-2.7063	0.0147286		AT2G30070.1	ATKT1, ATKT1P, ATKUP1, KUP1, KT1	potassium transporter 1	40.03	1e-166
	5	UN008884	2.05615	2.98721e-05	-0.616345	1	-2.14097	0.14099	-2.93146	1		AT2G14960.1	GH3.1	Auxin-responsive GH3 family protein	79.53	0
	5	UN021203	3.57904	0.959181	0.360051	1	-1.17949	1	-2.6031	0.026386		---	---	---	---	---
	5	UN018596	2.33879	0.0839722	1.48999	0.0165995	-1.37733	0.158206	-3.21801	1		AT4G35160.1	---	O-methyltransferase family protein	35.22	9e-30
	5	UN016726	1.46746	1.01949e-05	0.654078	1	-0.928362	0.253586	-2.07737	1		AT1G01720.1	ATAF1, ANAC002	NAC (No Apical Meristem) domain transcriptional regulator superfamily protein	41.44	5e-14
	5	UN022703	1.18977	0.0285923	1.41935	0.02665	-0.712634	1	-1.89298	1		AT2G40610.1	ATEXPA8, EXP8, ATEXP8, ATHEXP ALPHA 1.11, EXPA8	expansin A8	86.98	4e-127
	5	UN022091	2.71121	0.000140125	0.521201	1	-0.394733	1	-2.65089	1		AT2G28710.1	---	C2H2-type zinc finger family protein	66.67	1e-27
	5	UN016716	1.57515	0.000289198	0.297929	1	-0.431419	1	-1.86873	1		AT1G05010.1	EFE, ACO4, EAT1	ethylene-forming enzyme	69.25	8e-158
	5	UN026344	1.10146	1	-3.18372	0.0303432	-3.12601	0.789865	-3.05642	1		AT5G47320.1	RPS19	ribosomal protein S19	96.67	2e-14
	5	UN003694	---	---	4.94653	0.197611	0.177249	1	-4.2085	4.71245e-05		AT5G18475.1	---	Pentatricopeptide repeat (PPR) superfamily protein	52.47	0
	5	UN015068	-1.34095	1	1.87123	1	---	---	-1.15238	0.0299788		AT4G27340.1	---	Met-10+ like family protein	65.32	3e-99
	5	UN020199	-0.452112	1	1.762	1	0.673467	1	-1.70746	0.0271244		AT1G06500.1	---	unknown protein; Has 25 Blast hits to 25 proteins in 10 species: Archae - 0; Bacteria - 0; Metazoa - 0; Fungi - 0; Plants - 25; Viruses - 0; Other Eukaryotes - 0 (source: NCBI BLink).	30.52	2e-16
	5	UN011951	0.820052	0.117115	2.01047	0.00990343	1.34812	0.00242184	-2.72339	1		AT2G22240.1	ATMIPS2, MIPS2, ATIPS2	myo-inositol-1-phosphate synthase 2	90	0
	5	UN010568	0.622246	1	2.55412	1	2.21647	1	-2.9604	0.0268543		AT2G27690.1	CYP94C1	cytochrome P450, family 94, subfamily C, polypeptide 1	61.21	2e-132
	5	UN013389	0.229952	1	4.56433	1	3.07455	0.00197165	-4.87148	0.0993153		AT1G42430.1	---	unknown protein; BEST Arabidopsis thaliana protein match is: unknown protein (TAIR:AT3G55760.3); Has 186 Blast hits to 143 proteins in 47 species: Archae - 0; Bacteria - 23; Metazoa - 14; Fungi - 6; Plants - 87; Viruses - 0; Other Eukaryotes - 56 (source: NCBI BLink).	76.47	0
	5	UN015169	0.726719	0.547086	1.51367	0.00108927	0.389468	1	-2.04884	1		AT1G08570.1	ACHT4	atypical CYS HIS rich thioredoxin 4	70.11	1e-90
	5	UN012953	0.107587	1	1.74644	1	0.721617	1	-2.82751	5.57695e-05		AT3G24590.1	PLSP1	plastidic type i signal peptidase 1	49.17	2e-33
	5	UN022073	0.419191	1	3.82376	1	1.27488	1	-4.08734	0.0328715		AT4G36430.1	---	Peroxidase superfamily protein	45.82	6e-91
	5	UN001192	-1.15403	0.180432	-1.55116	0.186092	-0.561937	1	-2.57284	0.035202		AT1G72180.1	---	Leucine-rich receptor-like protein kinase family protein	53.73	0
	5	UN000495	-0.726966	1	-1.98114	0.000345456	0.0252787	1	-2.72374	1.48251e-05		AT3G45140.1	LOX2, ATLOX2	lipoxygenase 2	59.85	0
	5	UN022802	-1.24732	0.31081	-1.87197	0.676947	-0.024739	1	-3.40285	5.49307e-05		AT5G15740.1	---	O-fucosyltransferase family protein	54.17	5e-36
	5	UN001365	-0.182737	1	-0.772774	1	0.214758	1	-2.33877	0.0351789		AT1G65810.1	---	P-loop containing nucleoside triphosphate hydrolases superfamily protein	41.5	0
	5	UN004924	-0.8131	1	-1.75033	0.815652	0.0929647	1	-4.41334	0.00092946		AT1G66340.1	ETR1, EIN1, ETR, AtETR1	Signal transduction histidine kinase, hybrid-type, ethylene sensor	78.19	0
	5	UN007985	-1.23086	1	-1.40321	1	-0.338724	1	-5.49384	0.0480967		AT4G15530.5	PPDK	pyruvate orthophosphate dikinase	82.25	0
	5	UN010535	-0.583696	1	-0.591116	1	0.00633533	1	-2.47213	0.016553		AT1G71830.1	SERK1, ATSERK1	somatic embryogenesis receptor-like kinase 1	88.02	0
	5	UN004202	-1.01315	1	-1.82615	1	0.122134	1	-6.64193	8.92611e-05		AT4G27190.1	---	NB-ARC domain-containing disease resistance protein	33.14	5e-85
	5	UN010908	-0.518637	1	-0.871414	1	0.076175	1	-2.92682	0.000131881		AT2G39650.1	---	Protein of unknown function (DUF506)	55.34	6e-95
	5	UN002249	-0.204702	1	-1.00932	1	0.0352891	1	-2.00946	0.0181208		---	---	---	---	---
	5	UN010019	-0.0217279	1	-1.50114	1	-0.0923614	1	-2.88554	0.027572		AT5G18730.1	---	CONTAINS InterPro DOMAIN/s: Molecular chaperone, heat shock protein, Hsp40, DnaJ (InterPro:IPR015609); BEST Arabidopsis thaliana protein match is: Domain of unknown function (DUF3444) (TAIR:AT5G18740.1); Has 30201 Blast hits to 17322 proteins in 780 species: Archae - 12; Bacteria - 1396; Metazoa - 17338; Fungi - 3422; Plants - 5037; Viruses - 0; Other Eukaryotes - 2996 (source: NCBI BLink).	36.03	2e-38
	5	UN005904	-0.594382	1	-1.24582	0.0130927	-0.70987	0.456231	-3.06	1		AT5G60790.1	ATGCN1, GCN1	ABC transporter family protein	85.46	0
	5	UN002061	-1.11808	0.24491	-1.15331	1	-0.935573	1	-3.986	1.25058e-08		AT5G67360.1	ARA12	Subtilase family protein	70.95	0
	5	UN025029	-0.270587	1	-0.450834	1	-0.368018	1	-1.65598	0.00685789		AT1G80630.1	---	RNI-like superfamily protein	38.22	7e-26
	5	UN016328	-0.308502	1	-2.1426	1	-1.11725	1	-1.62349	0.000973435		AT1G64140.1	---	BEST Arabidopsis thaliana protein match is: loricrin-related (TAIR:AT5G64550.1); Has 3596 Blast hits to 2004 proteins in 150 species: Archae - 0; Bacteria - 54; Metazoa - 1597; Fungi - 38; Plants - 513; Viruses - 9; Other Eukaryotes - 1385 (source: NCBI BLink).	50.14	1e-76
	5	UN010693	-1.21332	1	-3.11893	1	-1.21265	1	-2.69132	5.96312e-06		AT1G11880.1	---	transferases, transferring hexosyl groups	52.2	2e-173
	5	UN029875	-1.53558	1	-5.66858	8.40859e-07	-1.33215	1	-3.74648	1		---	---	---	---	---
	5	UN005132	0.513263	1	-2.54258	0.0388297	-0.0534248	1	-1.7495	1		AT1G77590.1	LACS9	long chain acyl-CoA synthetase 9	75.32	0
	5	UN016274	-0.107037	1	-3.60062	1	-0.66084	1	-1.89131	0.00216266		AT3G49290.1	ABIL2	ABL interactor-like protein 2	59.91	4e-77
	5	UN038863	0.475711	1	---	---	0.196533	1	-3.53215	0.000164083		AT1G28540.1	---	unknown protein; Has 25 Blast hits to 25 proteins in 10 species: Archae - 0; Bacteria - 0; Metazoa - 0; Fungi - 0; Plants - 25; Viruses - 0; Other Eukaryotes - 0 (source: NCBI BLink).	70.89	2e-26
	5	UN007912	-1.7021	2.37843e-07	0.406541	1	-1.20075	0.311483	-2.23536	1		AT5G01320.1	---	Thiamine pyrophosphate dependent pyruvate decarboxylase family protein	82.73	0
	5	UN009161	-1.65419	0.0423538	-0.698908	1	-0.81271	1	-2.19128	0.431526		AT3G52500.1	---	Eukaryotic aspartyl protease family protein	50.62	2e-61
	5	UN015091	-1.4197	0.0111276	-0.626192	1	-0.22801	1	-2.0205	1		AT1G15000.1	scpl50	serine carboxypeptidase-like 50	61.12	0
	5	UN003306	-1.20937	0.0313696	-0.564621	1	-0.413117	1	-1.80236	1		AT5G67090.1	---	Subtilisin-like serine endopeptidase family protein	43.98	0
	5	UN017027	-3.89827	0.675235	-1.95995	1	-1.12539	1	-6.72953	0.0062427		AT4G03480.1	---	Ankyrin repeat family protein	28.57	5e-14
	5	UN031028	-1.82067	0.0110886	-0.131629	1	-1.03549	0.672495	-3.13292	1		AT1G51400.1	---	Photosystem II 5 kD protein	42.48	6e-10
	5	UN001591	-1.76722	1	-1.53327	0.32275	-0.045565	1	-4.36404	0.0216976		AT2G01950.1	VH1, BRL2	BRI1-like 2	67.85	0
	5	UN009257	-1.27635	0.876775	-0.988957	1	-0.156743	1	-3.79883	0.0355621		AT1G06750.2	---	P-loop containing nucleoside triphosphate hydrolases superfamily protein	66.81	0
	5	UN006397	-0.730314	1	-0.526143	1	0.140136	1	-2.01268	0.007037		AT1G25280.1	AtTLP10, TLP10	tubby like protein 10	54.92	1e-138
	5	UN021642	-1.16235	0.0450268	-0.56589	1	0.176933	1	-3.55252	1		AT3G10985.1	SAG20, WI12, ATWI-12	senescence associated gene 20	49.09	4e-26
	5	UN024077	-1.54892	1	-0.68605	1	0.462993	1	-4.21705	0.00155196		AT1G78690.1	---	Phospholipid/glycerol acyltransferase family protein	52.82	4e-44
	5	UN024248	-0.583309	1	-0.253249	1	0.120182	1	-1.36539	0.0348959		AT3G13990.1	---	Kinase-related protein of unknown function (DUF1296)	33.06	1e-27
	5	UN018661	-1.34368	1	-1.03338	1	-0.534932	1	-3.17972	0.00403323		AT2G46770.1	NST1, EMB2301, ANAC043	NAC (No Apical Meristem) domain transcriptional regulator superfamily protein	54.36	7e-107
	5	UN018216	-1.32852	0.0373266	-0.695354	1	-0.286874	1	-2.98249	1		AT5G12890.1	---	UDP-Glycosyltransferase superfamily protein	44.37	3e-143
	5	UN011623	-2.28081	0.000171501	-0.804875	1	0.0914774	1	-4.04869	2.81072e-15		AT1G42970.1	GAPB	glyceraldehyde-3-phosphate dehydrogenase B subunit	83.52	0
	5	UN011737	-3.15626	0.00322171	0.0757951	1	0.0540275	1	-5.19272	0.247887		AT5G51160.1	---	Ankyrin repeat family protein	29.63	1e-29
	5	UN013285	-1.444	0.0313025	-0.0783934	1	-0.226325	1	-2.76717	1		AT5G12890.1	---	UDP-Glycosyltransferase superfamily protein	45.15	2e-145
	5	UN016891	-1.59232	0.000241291	0.0906498	1	-0.319331	1	-3.24335	0.112734		AT4G37300.1	MEE59	maternal effect embryo arrest 59	50.83	2e-25
	5	UN032138	-1.8311	1	-0.22453	1	-0.211006	1	-4.10956	0.0133099		AT4G34410.1	RRTF1	redox responsive transcription factor 1	47.98	4e-29
	5	UN013605	-4.28139	0.388077	2.10855	1	0.227678	1	-4.47554	0.0366859		AT5G07800.1	---	Flavin-binding monooxygenase family protein	71.81	0
	5	UN037669	-1.74348	1	0.34189	1	-0.116961	1	-1.99734	0.0384127		---	---	---	---	---
	5	UN015657	-1.96716	1	-2.36693	1	1.67648	1	-2.55648	0.00718149		AT2G45850.1	---	AT hook motif DNA-binding family protein	55.29	6e-58
	5	UN001106	-0.963626	0.410252	-0.767244	1	0.0976046	1	-1.63887	0.0422105		AT1G72180.1	---	Leucine-rich receptor-like protein kinase family protein	53.58	0
	5	UN012432	-1.58241	0.00403095	-0.998406	1	0.194828	1	-2.07626	1		AT3G18080.1	BGLU44	B-S glucosidase 44	78.48	0
	5	UN001957	-3.19419	0.00771009	-1.88284	1	1.30544	0.841343	-3.74652	0.00480144		AT1G07650.2	---	Leucine-rich repeat transmembrane protein kinase	62.68	0
	5	UN002728	-1.4288	0.0389829	-0.659679	1	0.851073	0.618696	-1.81586	1		AT1G63770.5	---	Peptidase M1 family protein	76.03	0
	5	UN010470	-2.16709	0.684455	-0.827627	1	1.05764	1	-2.55583	0.0025389		AT1G56000.1	---	FAD/NAD(P)-binding oxidoreductase family protein	63.51	2e-157
	5	UN001772	-2.30071	1	-1.77381	0.999307	0.893409	1	-3.47993	0.0308583		AT2G34710.1	PHB, ATHB14, ATHB-14, PHB-1D	Homeobox-leucine zipper family protein / lipid-binding START domain-containing protein	75.95	0
	5	UN013632	-0.946327	1	-0.557897	1	0.541523	1	-1.55071	0.00277009		AT3G48310.1	CYP71A22	cytochrome P450, family 71, subfamily A, polypeptide 22	49.78	1e-133
	5	UN015430	-0.753055	0.310994	-0.480504	1	0.340271	1	-1.27693	0.0105551		AT3G25230.2	ROF1, ATFKBP62, FKBP62	rotamase FKBP 1	78.81	0
	5	UN002023	-0.685328	1	-0.197142	1	0.868838	0.496686	-1.86907	0.0201609		AT4G27220.1	---	NB-ARC domain-containing disease resistance protein	34.5	4e-112
	5	UN011319	-0.734873	1	-0.676817	1	0.999625	0.662063	-2.71177	0.04484		AT1G74910.1	---	ADP-glucose pyrophosphorylase family protein	84.38	0
	5	UN009081	-1.96562	1	-0.478416	1	1.26576	1	-4.62732	0.00691239		AT2G27350.5	---	OTU-like cysteine protease family protein	69.69	7e-148
	5	UN016601	-1.30849	0.579976	-0.244076	1	0.80128	1	-2.12622	0.0461641		AT3G47800.1	---	Galactose mutarotase-like superfamily protein	58.97	3e-138
	5	UN021597	-2.26025	1	-0.367093	1	1.68518	1	-2.86889	0.0355862		---	---	---	---	---
	5	UN003687	-0.675895	1	-0.771094	1	1.52099	0.0454253	-2.1918	0.00117122		---	---	---	---	---
	5	UN005413	-1.1619	0.261933	-0.896063	1	1.95391	0.00014673	-3.30101	1		AT4G19160.2	---	unknown protein; Has 35333 Blast hits to 34131 proteins in 2444 species: Archae - 798; Bacteria - 22429; Metazoa - 974; Fungi - 991; Plants - 531; Viruses - 0; Other Eukaryotes - 9610 (source: NCBI BLink).	59.5	4e-153
	5	UN009057	-1.03039	1	-0.87191	1	1.64445	0.793663	-2.74672	1.35783e-05		AT2G20340.1	---	Pyridoxal phosphate (PLP)-dependent transferases superfamily protein	77.17	0
	5	UN010647	---	---	-0.462972	1	3.77555	0.726503	-4.00318	0.0130296		AT5G51980.2	---	Transducin/WD40 repeat-like superfamily protein	55.25	2e-63
	5	UN022770	-1.26478	1	-0.364874	1	2.19021	1	-2.31355	0.0229744		AT1G45230.1	---	Protein of unknown function (DUF3223)	80.7	6e-30
	5	UN032247	-1.09091	1	---	---	1.7635	1	-2.26727	0.00940647		AT4G14965.1	AtMAPR4, MAPR4	membrane-associated progesterone binding protein 4	81.54	3e-22
	5	UN005038	-2.24043	1	2.34754	1	2.69958	1	-5.63962	0.0296315		AT1G79640.1	---	Protein kinase superfamily protein	58.09	0
	5	UN018062	-2.72069	1	1.92267	1	1.41763	1	-3.52137	2.1109e-06		AT1G51630.1	---	O-fucosyltransferase family protein	38.54	2e-09
	5	UN003832	-1.53472	0.00974955	0.635497	1	0.664955	0.776265	-2.14314	0.267558		AT5G64570.1	XYL4, ATBXL4	beta-D-xylosidase 4	72.83	0
	5	UN024175	-1.27571	0.0370047	0.469575	1	0.914572	0.512342	-2.36064	1		AT3G16120.1	---	Dynein light chain type 1 family protein	75	2e-47
	5	UN006496	-0.497547	1	0.460842	1	0.981322	1	-2.56332	5.11982e-05		AT1G73110.1	---	P-loop containing nucleoside triphosphate hydrolases superfamily protein	79.95	0
	5	UN011550	-0.473198	1	0.578866	1	1.78915	0.351854	-5.72	0.000107376		---	---	---	---	---
	5	UN013102	-0.983233	1	0.0723276	1	1.34501	0.933554	-4.22488	0.0451507		AT1G47570.1	---	RING/U-box superfamily protein	55.07	0
	5	UN005345	-1.03666	0.0447115	0.300794	1	0.428204	1	-4.06304	0.934067		AT1G53210.1	---	sodium/calcium exchanger family protein / calcium-binding EF hand family protein	60.53	0
	5	UN012595	-0.802174	1	0.221137	1	0.481828	1	-2.35496	0.000225597		AT5G27730.1	---	Protein of unknown function (DUF1624)	56.96	2e-158
	5	UN013585	-1.98655	0.204792	-0.0673839	1	1.41424	0.397405	-6.07793	0.00304013		---	---	---	---	---
	5	UN028728	-0.398061	1	0.0606908	1	0.243372	1	-3.83347	0.0488869		AT5G14910.1	---	Heavy metal transport/detoxification superfamily protein	68.24	1e-36
	5	UN006399	-0.68893	1	-1.72152	1	0.637853	1	-1.99847	0.00287924		AT2G03240.1	---	EXS (ERD1/XPR1/SYG1) family protein	68.38	4e-57
	5	UN006996	-0.266057	1	-1.59179	1	1.1057	1	-2.23889	6.96568e-05		AT4G21065.1	---	Tetratricopeptide repeat (TPR)-like superfamily protein	51.76	3e-174
	5	UN006000	-0.51831	1	-1.54185	1	1.90361	0.0299281	-4.19854	0.783738		AT5G07740.1	---	actin binding	90.85	3e-90
	5	UN007235	-0.872108	0.900458	-0.672236	1	0.448575	1	-2.1412	0.0243141		AT2G35800.1	---	mitochondrial substrate carrier family protein	58.24	0
	5	UN007846	-2.59618	1	-2.93872	1	0.985545	1	-5.56344	0.0365544		AT3G60310.1	---	unknown protein; Has 22 Blast hits to 18 proteins in 9 species: Archae - 0; Bacteria - 0; Metazoa - 0; Fungi - 0; Plants - 22; Viruses - 0; Other Eukaryotes - 0 (source: NCBI BLink).	48.45	1e-16
	5	UN001855	-0.909323	0.526039	-1.80071	0.0355374	0.735616	0.832063	-3.26971	0.555611		AT4G27220.1	---	NB-ARC domain-containing disease resistance protein	34.5	4e-112
	5	UN017356	-0.592974	1	-1.1431	1	0.76684	1	-2.95714	2.14994e-06		AT2G22070.1	---	pentatricopeptide (PPR) repeat-containing protein	74.18	0
	5	UN004027	0.259935	1	-0.575249	1	0.251887	1	-1.36509	0.0350556		AT3G50780.1	---	BEST Arabidopsis thaliana protein match is: BTB/POZ domain-containing protein (TAIR:AT1G63850.1); Has 298 Blast hits to 298 proteins in 22 species: Archae - 0; Bacteria - 0; Metazoa - 10; Fungi - 0; Plants - 287; Viruses - 0; Other Eukaryotes - 1 (source: NCBI BLink).	59.25	0
	5	UN008577	0.347369	1	-0.7077	1	0.233913	1	-1.87594	0.000106287		AT5G41110.1	---	unknown protein; INVOLVED IN: biological_process unknown; LOCATED IN: chloroplast; BEST Arabidopsis thaliana protein match is: unknown protein (TAIR:AT3G26890.5); Has 1807 Blast hits to 1807 proteins in 277 species: Archae - 0; Bacteria - 0; Metazoa - 736; Fungi - 347; Plants - 385; Viruses - 0; Other Eukaryotes - 339 (source: NCBI BLink).	38.07	5e-78
	5	UN015467	0.142955	1	-1.90094	1	0.578156	1	-3.51103	1.68525e-09		AT3G60000.2	QWRF6	Family of unknown function (DUF566)	44.9	1e-50
	5	UN016573	0.227574	1	-1.09651	1	0.585578	0.848137	-2.2613	0.00604183		AT1G27000.1	---	Protein of unknown function (DUF1664)	55.43	3e-75
	5	UN022977	0.875496	1	-1.22453	1	1.44995	1	-2.90708	5.3565e-06		AT3G32930.1	---	unknown protein; FUNCTIONS IN: molecular_function unknown; INVOLVED IN: biological_process unknown; LOCATED IN: chloroplast envelope; EXPRESSED IN: 22 plant structures; EXPRESSED DURING: 13 growth stages; Has 57 Blast hits to 57 proteins in 11 species: Archae - 0; Bacteria - 0; Metazoa - 0; Fungi - 0; Plants - 57; Viruses - 0; Other Eukaryotes - 0 (source: NCBI BLink).	89.66	2e-11
	5	UN006280	-0.289531	1	0.669003	1	1.11417	0.0568365	-6.19287	0.00209394		AT1G30330.2	ARF6	auxin response factor 6	85.55	0
	5	UN022800	-0.0591379	1	0.205334	1	0.871976	1	-3.94136	0.000364809		AT1G28240.1	---	Protein of unknown function (DUF616)	79.43	6e-100
	5	UN027734	0.20852	1	0.410484	1	0.883628	1	-5.75182	0.00619793		AT1G24095.1	---	Putative thiol-disulphide oxidoreductase DCC	64.53	8e-79
	5	UN009135	0.027933	1	-0.0687458	1	0.667797	1	-3.11108	0.00295834		AT3G52200.2	LTA3	Dihydrolipoamide acetyltransferase, long form protein	75.76	2e-125
	5	UN028933	-0.373016	1	-0.100457	1	0.710591	1	-4.25534	0.00103143		AT1G50900.1	GDC1	Ankyrin repeat family protein	70.27	4e-71
	5	UN007504	0.55927	1	0.25116	1	0.282577	1	-3.45751	0.0011949		AT5G24120.1	SIGE, SIG5, ATSIG5	sigma factor E	60.57	0
	5	UN016080	0.853759	1	0.238331	1	0.741645	1	-5.59259	0.0335847		AT5G48380.1	BIR1	BAK1-interacting receptor-like kinase 1	43.43	2e-59
	5	UN010227	0.332467	1	-0.0509368	1	0.434383	1	-5.91087	0.00707488		AT5G26180.1	---	S-adenosyl-L-methionine-dependent methyltransferases superfamily protein	65.25	0
	5	UN009775	0.625605	1	-0.0618685	1	0.103997	1	-6.67877	3.3225e-05		AT2G39830.1	DAR2	DA1-related protein 2	64.17	0
	5	UN023572	0.350821	1	-0.0319741	1	0.129103	1	-3.1471	0.0238951		AT1G32210.1	ATDAD1	Defender against death (DAD family) protein	91.89	5e-72
	5	UN018045	0.129319	1	0.757989	1	0.200589	1	-5.65582	0.0258064		AT5G26610.1	---	D111/G-patch domain-containing protein	62.55	9e-97
	5	UN027854	0.220759	1	0.469327	1	0.381285	1	-3.70187	5.70534e-05		AT1G17180.1	ATGSTU25, GSTU25	glutathione S-transferase TAU 25	59.01	6e-87
	5	UN020652	0.593881	1	0.497109	1	-0.122583	1	-5.50443	0.0456959		AT5G43050.1	NPQ6	Protein of unknown function (DUF565)	85.47	4e-69
	5	UN004369	0.673507	1	0.538727	1	0.125997	1	-7.56385	5.42323e-10		AT4G25690.1	---	unknown protein; BEST Arabidopsis thaliana protein match is: unknown protein (TAIR:AT4G25670.2); Has 73 Blast hits to 60 proteins in 13 species: Archae - 0; Bacteria - 2; Metazoa - 4; Fungi - 0; Plants - 67; Viruses - 0; Other Eukaryotes - 0 (source: NCBI BLink).	37.74	3e-18
	5	UN011368	0.531724	1	0.603828	1	0.283286	1	-6.69121	8.70423e-05		AT2G26600.1	---	Glycosyl hydrolase superfamily protein	70.45	0
	5	UN006510	0.47863	1	0.449086	1	0.248877	1	-7.17836	7.54806e-07		AT4G18750.1	DOT4	Pentatricopeptide repeat (PPR) superfamily protein	37.55	2e-114
	5	UN029959	0.435279	1	0.617131	1	0.262431	1	-7.40633	5.29208e-05		AT5G04870.1	CPK1, ATCPK1	calcium dependent protein kinase 1	24.82	3e-10
	5	UN003738	-0.180619	1	0.0604724	1	0.204732	1	-2.26517	0.0025389		AT4G05190.1	ATK5	kinesin 5	63.79	0
	5	UN004544	0.044694	1	0.0664058	1	0.8073	0.397453	-7.27038	1.58683e-07		AT3G13870.1	RHD3	Root hair defective 3 GTP-binding protein (RHD3)	76.33	0
	5	UN006395	-0.0624566	1	-0.00370723	1	0.33204	1	-3.65694	1.48251e-05		AT4G01170.1	---	unknown protein; BEST Arabidopsis thaliana protein match is: unknown protein (TAIR:AT3G07730.1); Has 211 Blast hits to 211 proteins in 60 species: Archae - 0; Bacteria - 22; Metazoa - 50; Fungi - 11; Plants - 77; Viruses - 0; Other Eukaryotes - 51 (source: NCBI BLink).	40	1e-16
	5	UN003202	0.0391228	1	0.262531	1	0.146166	1	-5.47899	0.0479687		AT1G65470.1	FAS1, NFB2	FAS1, NFB2	50.29	6e-74
	5	UN003167	-0.0767425	1	0.15582	1	0.459193	1	-7.1227	3.92599e-07		AT4G15415.2	ATB' GAMMA	Protein phosphatase 2A regulatory B subunit family protein	69.54	0
	5	UN006426	-0.103161	1	0.101486	1	0.27143	1	-7.53072	9.38978e-10		AT5G15470.1	GAUT14	galacturonosyltransferase 14	78.57	0
	5	UN013695	-0.0428095	1	0.0760434	1	0.1566	1	-3.3063	0.000180501		AT4G13030.1	---	P-loop containing nucleoside triphosphate hydrolases superfamily protein	49.66	3e-85
	5	UN013022	-0.213128	1	0.418184	1	0.292021	1	-4.62164	0.00121875		AT5G60990.1	---	DEA(D/H)-box RNA helicase family protein	74.01	0
	5	UN012346	-0.228012	1	0.41125	1	0.0392266	1	-4.98568	0.0144392		AT4G31940.1	CYP82C4	cytochrome P450, family 82, subfamily C, polypeptide 4	55.13	5e-169
	5	UN020141	-0.201071	1	0.515632	1	0.197739	1	-6.49432	0.000139024		AT4G26980.1	---	RNI-like superfamily protein	56.37	4e-117
	5	UN004727	0.0311605	1	-0.0639679	1	0.213278	1	-6.41803	0.000246542		AT4G32050.1	---	neurochondrin family protein	53.35	0
	5	UN009465	0.113491	1	-0.274946	1	0.323249	1	-6.27143	0.00121615		AT3G07930.3	---	DNA glycosylase superfamily protein	57.33	4e-57
	5	UN010677	0.0984368	1	-0.297714	1	0.0256855	1	-8.22571	1.30023e-15		AT2G41460.1	ARP	apurinic endonuclease-redox protein	67.51	3e-171
	5	UN012271	0.0531683	1	-0.117439	1	-0.0128828	1	-3.95925	0.000189627		AT2G20360.1	---	NAD(P)-binding Rossmann-fold superfamily protein	77.78	0
	5	UN013142	-0.0187827	1	-0.0761188	1	-0.0256258	1	-2.66771	4.92136e-05		AT5G63050.1	EMB2759	embryo defective 2759	45.66	5e-85
	5	UN005009	-0.0711615	1	-0.37213	1	0.239752	1	-8.05947	8.62363e-13		AT5G62190.1	PRH75	DEAD box RNA helicase (PRH75)	73.56	0
	5	UN013426	-0.0187674	1	-0.103254	1	0.0143964	1	-2.08405	0.000111422		AT3G04560.1	---	unknown protein; FUNCTIONS IN: molecular_function unknown; INVOLVED IN: biological_process unknown; EXPRESSED IN: 22 plant structures; EXPRESSED DURING: 16 growth stages; Has 227 Blast hits to 225 proteins in 83 species: Archae - 0; Bacteria - 17; Metazoa - 98; Fungi - 29; Plants - 51; Viruses - 1; Other Eukaryotes - 31 (source: NCBI BLink).	63.16	4e-145
	5	UN017340	-0.0751228	1	-0.120471	1	0.0199113	1	-3.11659	0.00403323		AT5G26040.2	HDA2	histone deacetylase 2	74.85	9e-180
	5	UN012453	-0.0876946	1	-0.207726	1	0.036651	1	-2.52076	0.0036803		AT5G40870.1	ATUK/UPRT1, UKL1, UK/UPRT1	uridine kinase/uracil phosphoribosyltransferase 1	84.32	0
	5	UN005170	-0.116579	1	-0.291571	1	-0.0281192	1	-2.83731	0.0291759		AT4G38890.1	---	FMN-linked oxidoreductases superfamily protein	61.57	0
	5	UN024298	-0.121109	1	-0.541119	1	-0.0735921	1	-5.98032	0.00490342		AT3G20430.1	---	CONTAINS InterPro DOMAIN/s: Phosphorylated adapter RNA export protein, RNA-binding domain (InterPro:IPR019385); Has 110 Blast hits to 110 proteins in 51 species: Archae - 0; Bacteria - 3; Metazoa - 56; Fungi - 0; Plants - 36; Viruses - 0; Other Eukaryotes - 15 (source: NCBI BLink).	50.88	7e-53
	5	UN014158	-0.335712	1	-0.0104334	1	-0.361393	1	-3.88205	1.1888e-20		---	---	---	---	---
	5	UN009725	-0.103909	1	-0.00983559	1	-0.169918	1	-2.25665	0.000218684		AT4G10430.1	---	TMPIT-like protein	68.1	4e-166
	5	UN023443	-0.0554561	1	-0.109475	1	-0.209776	1	-3.2237	0.0342354		AT3G13772.1	TMN7, AtTMN7	transmembrane nine 7	87.5	0
	5	UN020519	-0.716442	1	0.263203	1	-0.060149	1	-4.99738	1.52624e-05		---	---	---	---	---
	5	UN023862	-0.727501	1	0.288507	1	-0.142592	1	-6.36924	0.0330084		---	---	---	---	---
	5	UN024830	-0.707012	1	0.426018	1	0.0743307	1	-7.02284	0.0164099		AT4G15248.1	---	B-box type zinc finger family protein	49.3	2e-21
	5	UN013561	0.0621609	1	0.197022	1	-0.206196	1	-2.01493	0.000235284		AT2G02380.1	ATGSTZ2, GSTZ2	glutathione S-transferase (class zeta) 2	58.77	7e-83
	5	UN017251	0.112802	1	0.363704	1	-0.134933	1	-4.19063	0.000736088		AT5G19150.1	---	pfkB-like carbohydrate kinase family protein	72.01	1e-152
	5	UN002630	0.0195861	1	0.0914776	1	-0.0228604	1	-1.74917	0.0358657		AT4G16150.1	---	calmodulin binding;transcription regulators	45.36	2e-103
	5	UN003845	-0.0461683	1	0.429319	1	-0.0473019	1	-6.75852	1.43348e-05		AT5G01160.1	---	RING/U-box superfamily protein	70.06	4e-82
	5	UN012091	-0.014873	1	0.160652	1	0.00814006	1	-4.50461	9.22118e-07		AT5G61450.1	---	P-loop containing nucleoside triphosphate hydrolases superfamily protein	65.71	0
	5	UN023341	-0.119035	1	0.298366	1	-0.114086	1	-5.16547	3.42221e-05		AT5G30490.1	---	CONTAINS InterPro DOMAIN/s: Craniofacial development protein 1/Bucentaur (InterPro:IPR011421); Has 333 Blast hits to 324 proteins in 149 species: Archae - 0; Bacteria - 18; Metazoa - 117; Fungi - 96; Plants - 49; Viruses - 0; Other Eukaryotes - 53 (source: NCBI BLink).	52.51	2e-52
	5	UN011785	-0.188114	1	0.00313402	1	-0.100814	1	-4.97642	0.000727453		AT5G10860.1	---	Cystathionine beta-synthase (CBS) family protein	80.58	1e-121
	5	UN023856	-0.072166	1	0.0951367	1	-0.255123	1	-6.32172	0.00124374		AT2G26340.2	---	unknown protein.	56.76	8e-47
	5	UN004582	0.13262	1	-0.0863151	1	-0.428624	1	-6.1518	1.54185e-33		AT4G08500.1	MEKK1, ATMEKK1, MAPKKK8, ARAKIN	MAPK/ERK kinase kinase 1	64.64	6e-127
	5	UN010402	0.0464393	1	-0.0200782	1	-0.159891	1	-1.74563	0.0268543		AT4G04950.1	---	thioredoxin family protein	75.34	4e-115
	5	UN018145	0.267228	1	0.0103661	1	-0.370569	1	-7.64562	1.40569e-10		AT5G47030.1	---	ATPase, F1 complex, delta/epsilon subunit	72.28	4e-87
	5	UN007052	0.120601	1	0.203526	1	-0.292363	1	-5.49194	0.00417503		AT1G71800.1	CSTF64	cleavage stimulating factor 64	70.95	1e-107
	5	UN017779	0.289458	1	0.276432	1	-0.332234	1	-6.21203	0.00112884		AT5G66010.1	---	RNA-binding (RRM/RBD/RNP motifs) family protein	63.42	6e-95
	5	UN005762	0.185239	1	0.163477	1	-0.082133	1	-5.76012	0.0218263		AT4G40050.1	---	Protein of unknown function (DUF3550/UPF0682)	55.39	7e-170
	5	UN010304	0.181159	1	0.148451	1	-0.0869412	1	-5.72805	0.0187193		AT3G59920.1	ATGDI2, GDI2	RAB GDP dissociation inhibitor 2	84.11	0
	5	UN021412	0.230979	1	0.345873	1	-0.134051	1	-6.63583	0.000133893		AT5G25360.1	---	unknown protein; BEST Arabidopsis thaliana protein match is: unknown protein (TAIR:AT4G32342.1); Has 1807 Blast hits to 1807 proteins in 277 species: Archae - 0; Bacteria - 0; Metazoa - 736; Fungi - 347; Plants - 385; Viruses - 0; Other Eukaryotes - 339 (source: NCBI BLink).	65.73	3e-54
	5	UN002451	0.417199	1	0.19256	1	-0.436003	1	-6.25126	0.000887576		AT1G79090.1	---	FUNCTIONS IN: molecular_function unknown; INVOLVED IN: biological_process unknown; LOCATED IN: cellular_component unknown; EXPRESSED IN: 25 plant structures; EXPRESSED DURING: 15 growth stages; CONTAINS InterPro DOMAIN/s: Topoisomerase II-associated protein PAT1 (InterPro:IPR019167); BEST Arabidopsis thaliana protein match is: Topoisomerase II-associated protein PAT1 (TAIR:AT3G22270.1); Has 30201…	49.57	0
	5	UN033368	0.471391	0.724023	0.210167	1	-0.257302	1	-6.80205	6.85745e-17		AT5G60390.1	---	GTP binding Elongation factor Tu family protein	92.11	2e-43
	5	UN013624	0.317448	1	-0.616521	1	0.540821	1	-2.23417	6.79755e-05		AT5G61330.1	---	rRNA processing protein-related	61.8	4e-121
	5	UN013978	0.25921	1	-0.56319	1	0.431581	1	-3.09689	0.047332		AT1G04945.3	---	HIT-type Zinc finger family protein	63.52	1e-106
	5	UN001842	0.59769	1	-0.0395534	1	0.669937	1	-3.24514	0.0140134		AT3G07040.1	RPM1, RPS3	NB-ARC domain-containing disease resistance protein	41.45	1e-173
	5	UN013445	0.210003	1	0.00532015	1	0.460314	1	-2.19141	0.00216314		AT5G51160.1	---	Ankyrin repeat family protein	33.11	7e-33
	5	UN030442	0.531395	1	-0.224213	1	0.372206	1	-2.21304	0.016553		AT3G62190.1	---	Chaperone DnaJ-domain superfamily protein	55.07	3e-38
	5	UN020319	0.167474	1	-0.280544	1	0.963232	0.808183	-2.37136	0.0153538		AT5G19820.1	emb2734	ARM repeat superfamily protein	83.37	0
	5	UN015662	0.493104	1	0.0948415	1	1.26943	1	-3.4464	0.000281589		---	---	---	---	---
	5	UN033725	1.36955	1	-0.142563	1	2.26861	1	-5.67309	5.77612e-29		AT2G26200.1	---	S-adenosyl-L-methionine-dependent methyltransferases superfamily protein	59.48	4e-38
	5	UN008042	-0.00983439	1	-0.0662035	1	-0.695559	1	-1.84681	0.0132053		AT3G26780.1	---	Phosphoglycerate mutase family protein	60.65	3e-149
	5	UN013999	-0.106809	1	-0.220239	1	-2.02953	2.78552e-05	-6.72916	0.0325219		AT2G31160.1	LSH3	Protein of unknown function (DUF640)	88.55	1e-72
	5	UN014648	-0.169097	1	-0.1779	1	-2.15137	0.012549	-8.28759	6.80602e-15		AT2G41060.1	---	RNA-binding (RRM/RBD/RNP motifs) family protein	53.92	2e-75
	5	UN015243	0.0114599	1	-0.0651011	1	-0.947492	0.644262	-3.38649	5.85145e-10		AT4G22140.1	EBS	PHD finger family protein / bromo-adjacent homology (BAH) domain-containing protein	76.96	4e-128
	5	UN019366	0.325648	1	0.0325145	1	-0.694792	0.731116	-2.11752	1.33301e-05		AT5G51570.1	---	SPFH/Band 7/PHB domain-containing membrane-associated protein family	84.83	0
	5	UN012610	0.356965	1	0.569336	1	-1.24479	0.0457357	-3.57353	1		---	---	---	---	---
	5	UN004799	0.1153	1	0.23655	1	-0.732108	0.849529	-1.7069	0.0321953		AT1G08410.1	---	P-loop containing nucleoside triphosphate hydrolases superfamily protein	57.53	3e-16
	5	UN013762	0.126733	1	0.425659	1	-1.16034	0.0443109	-2.75884	1		AT5G65430.3	GRF8	general regulatory factor 8	82.26	1e-139
	5	UN012168	0.135738	1	0.405468	1	-0.605204	0.986285	-2.54634	0.026386		AT3G10410.1	SCPL49, CPY	SERINE CARBOXYPEPTIDASE-LIKE 49	68.94	0
	5	UN022499	0.212497	1	0.420246	1	-0.576866	1	-2.95461	0.0150365		AT4G22320.1	---	unknown protein; BEST Arabidopsis thaliana protein match is: unknown protein (TAIR:AT5G55210.1); Has 8953 Blast hits to 5363 proteins in 542 species: Archae - 33; Bacteria - 806; Metazoa - 2454; Fungi - 831; Plants - 279; Viruses - 151; Other Eukaryotes - 4399 (source: NCBI BLink).	39.24	9e-26
	5	UN025185	-0.282992	1	1.59163	1	-1.67334	1	-7.23091	0.0259694		AT5G39450.1	---	F-box family protein	39.1	4e-32
	5	UN005424	0.366247	1	0.166314	1	-0.465772	1	-3.07587	0.000973491		AT1G71980.1	---	Protease-associated (PA) RING/U-box zinc finger family protein	71.48	4e-128
	5	UN009394	0.920168	0.0168814	0.613602	1	-1.27018	0.262272	-10.4361	6.32647e-30		AT1G77380.1	AAP3, ATAAP3	amino acid permease 3	77.68	0
	5	UN020076	0.26826	1	0.0507064	1	-0.859031	0.63875	-5.71752	0.020085		AT3G48680.1	GAMMA CAL2	gamma carbonic anhydrase-like 2	85.65	3e-138
	5	UN016777	0.244842	1	0.133312	1	-0.498923	1	-2.48353	7.39072e-05		AT2G27310.1	---	F-box family protein	26.98	3e-30
	5	UN024115	0.170046	1	0.0426324	1	-0.432234	1	-2.26097	0.0252888		AT3G04780.1	---	Protein of unknown function (DUF1000)	77.84	9e-102
	5	UN013892	0.376904	1	0.393496	1	-0.560571	1	-2.93254	6.76958e-05		AT1G08070.1	OTP82	Tetratricopeptide repeat (TPR)-like superfamily protein	40.18	5e-145
	5	UN016172	0.50207	1	0.376324	1	-0.482761	1	-2.54676	0.0213409		AT4G13530.1	---	unknown protein; BEST Arabidopsis thaliana protein match is: unknown protein (TAIR:AT4G10080.1); Has 30201 Blast hits to 17322 proteins in 780 species: Archae - 12; Bacteria - 1396; Metazoa - 17338; Fungi - 3422; Plants - 5037; Viruses - 0; Other Eukaryotes - 2996 (source: NCBI BLink).	56.86	1e-36
	5	UN017323	0.352639	1	0.185814	1	-0.498185	1	-2.10616	0.0402006		AT4G09580.1	---	SNARE associated Golgi protein family	72.26	2e-140
	5	UN032858	0.470015	1	0.179915	1	-0.487678	1	-2.33781	7.63282e-07		AT1G08980.1	ATAMI1, AMI1, ATTOC64-I, TOC64-I	amidase 1	61.64	9e-27
	5	UN001116	0.310406	1	-0.97486	1	-0.590505	1	-6.56903	8.10232e-05		AT5G57130.1	---	Clp amino terminal domain-containing protein	50.82	2e-91
	5	UN005563	-0.0357745	1	-0.429266	1	-0.604644	1	-5.90241	5.57695e-05		AT5G08560.1	---	transducin family protein / WD-40 repeat family protein	60.71	0
	5	UN011072	0.0867705	1	-0.197057	1	-0.292474	1	-2.00442	0.00475141		AT1G23820.1	SPDS1	spermidine synthase 1	83.62	0
	5	UN013554	0.222757	1	-0.24745	1	-0.66487	1	-5.22902	0.0025172		AT5G15710.1	---	Galactose oxidase/kelch repeat superfamily protein	26.8	3e-32
	5	UN020963	-0.0560937	1	-0.37604	1	-0.278337	1	-1.98443	8.27657e-05		AT4G25370.1	---	Double Clp-N motif protein	51.91	2e-78
	5	UN004600	-0.687072	1	-1.22569	1	-0.0701213	1	-8.47671	5.74359e-17		---	---	---	---	---
	5	UN004641	-0.151111	1	-0.342243	1	-0.153516	1	-2.30669	0.00576706		AT5G65570.1	---	Tetratricopeptide repeat (TPR)-like superfamily protein	59.5	0
	5	UN025382	-0.0935979	1	-1.50855	1	-0.232822	1	-5.83473	0.018019		AT2G28060.1	---	5'-AMP-activated protein kinase beta-2 subunit protein	65.05	5e-42
	5	UN004122	0.271169	1	-0.105491	1	-0.0507509	1	-1.45064	0.0155554		AT3G50120.1	---	Plant protein of unknown function (DUF247)	33.64	1e-67
	5	UN020411	0.705595	1	-0.210567	1	-0.148376	1	-4.35099	0.00815616		AT4G17540.1	---	unknown protein; Has 30201 Blast hits to 17322 proteins in 780 species: Archae - 12; Bacteria - 1396; Metazoa - 17338; Fungi - 3422; Plants - 5037; Viruses - 0; Other Eukaryotes - 2996 (source: NCBI BLink).	32.81	9e-25
	5	UN001302	0.268122	1	-0.4328	1	-0.256683	1	-2.23154	1.99237e-07		AT1G14790.1	RDR1, ATRDRP1	RNA-dependent RNA polymerase 1	68.26	9e-161
	5	UN024789	0.717008	1	-0.69423	1	-0.822751	1	-4.78832	0.000308657		AT1G69850.1	ATNRT1:2, NTL1, NRT1:2	nitrate transporter 1:2	54.63	1e-76
	5	UN038016	1.19174	1	-1.64894	1	-0.579949	1	-6.11227	0.00445375		---	---	---	---	---
	5	UN004524	-0.322461	1	0.348348	1	-0.350093	1	-2.50992	0.0373861		AT4G31590.1	ATCSLC05, CSLC05, ATCSLC5, CSLC5	Cellulose-synthase-like C5	80.29	0
	5	UN012671	-0.438778	1	0.374329	1	-0.324335	1	-3.47523	9.98759e-18		AT2G47260.1	WRKY23, ATWRKY23	WRKY DNA-binding protein 23	47.19	4e-43
	5	UN002373	-0.781823	1	0.183729	1	0.0222922	1	-2.13705	0.00135175		AT4G28760.1	---	Protein of unknown function (DUF3741)	43.48	1e-87
	5	UN007790	-0.636884	1	0.138323	1	-0.144775	1	-1.85001	8.12242e-06		---	---	---	---	---
	5	UN010801	-1.93012	1	1.36124	1	-0.415212	1	-5.98166	0.00836614		AT5G64830.1	---	programmed cell death 2 C-terminal domain-containing protein	52.22	4e-57
	5	UN009981	-0.612673	1	-0.0326905	1	-0.613306	1	-3.03598	0.000246542		AT1G80710.1	DRS1	DROUGHT SENSITIVE 1	45.32	2e-134
	5	UN012801	-0.967805	0.877931	-1.06455	1	-1.79973	0.0365519	-5.70234	0.029986		AT3G16520.3	UGT88A1	UDP-glucosyl transferase 88A1	54.28	1e-88
	5	UN015523	-0.403495	1	-0.237282	1	-0.500813	1	-2.00005	0.0159457		AT2G37220.1	---	RNA-binding (RRM/RBD/RNP motifs) family protein	67.21	1e-102
	5	UN017872	-0.559455	1	-0.45484	1	-0.760441	1	-3.43535	9.82246e-05		AT1G62400.1	HT1	Protein kinase superfamily protein	81.08	0
	5	UN005638	-0.676295	1	-0.299595	1	-1.13348	0.854955	-6.17988	0.00264969		AT3G13840.1	---	GRAS family transcription factor	45	3e-119
	5	UN010976	-0.901306	1	-0.913672	1	-1.2719	1	-7.21342	1.80788e-07		---	---	---	---	---
	5	UN006558	-0.049232	1	-0.275569	1	-0.396022	1	-1.64181	8.08662e-05		AT5G09590.1	MTHSC70-2, HSC70-5	mitochondrial HSO70 2	85.8	0
	5	UN026574	-0.553567	1	-0.509597	1	-1.43468	1	-6.24765	0.000977723		AT5G42860.1	---	unknown protein; FUNCTIONS IN: molecular_function unknown; INVOLVED IN: biological_process unknown; LOCATED IN: plasma membrane; EXPRESSED IN: 19 plant structures; EXPRESSED DURING: 11 growth stages; BEST Arabidopsis thaliana protein match is: unknown protein (TAIR:AT1G45688.1); Has 1807 Blast hits to 1807 proteins in 277 species: Archae - 0; Bacteria - 0; Metazoa - 736; Fungi - 347; Plants - 385…	50.79	5e-70
	5	UN003851	-0.517023	1	-0.242514	1	0.505912	1	-2.18747	4.9127e-06		AT2G16440.1	MCM4	Minichromosome maintenance (MCM2/3/5) family protein	75.96	7e-153
	5	UN006568	-0.491582	1	-0.351129	1	0.353443	1	-1.67547	4.37894e-05		AT5G11240.1	---	transducin family protein / WD-40 repeat family protein	26.93	1e-60
	5	UN010171	-0.352962	1	-0.253857	1	0.183116	1	-1.2432	0.0391964		AT2G26560.1	PLP2, PLA IIA, PLA2A	phospholipase A 2A	67.6	0
	5	UN001260	-0.506321	1	-0.602107	1	0.299378	1	-2.93325	0.0015391		AT3G47570.1	---	Leucine-rich repeat protein kinase family protein	45.68	4e-165
	5	UN020887	-0.438411	1	-0.633517	1	0.596431	1	-4.24464	0.00497244		AT4G28740.1	---	FUNCTIONS IN: molecular_function unknown; INVOLVED IN: biological_process unknown; LOCATED IN: chloroplast; EXPRESSED IN: 21 plant structures; EXPRESSED DURING: 13 growth stages; CONTAINS InterPro DOMAIN/s: Protein of unknown function DUF3493 (InterPro:IPR021883); BEST Arabidopsis thaliana protein match is: tetratricopeptide repeat (TPR)-containing protein (TAIR:AT1G02910.1); Has 30201 Blast hits…	65.06	6e-127
	5	UN009007	-1.22277	1	-1.30032	1	-0.631813	1	-7.49954	7.06884e-09		AT5G60720.1	---	Protein of unknown function, DUF547	48.19	6e-121
	5	UN015489	-0.266579	1	-0.197033	1	-0.130791	1	-1.43085	0.0296315		AT2G30280.1	RDM4, DMS4	RNA-directed DNA methylation 4	44.35	8e-63
	5	UN004883	-1.93233	0.329042	-1.4071	0.477955	0.0760284	1	-7.97952	2.60772e-13		AT5G49665.1	---	Zinc finger (C3HC4-type RING finger) family protein	53.41	4e-57
	5	UN005547	-1.10783	0.919562	-0.552776	1	0.06131	1	-4.62692	0.000514707		---	---	---	---	---
	5	UN006309	-0.710903	0.405016	-0.633915	1	-0.0536113	1	-4.40719	0.00272358		AT1G26850.1	---	S-adenosyl-L-methionine-dependent methyltransferases superfamily protein	72.68	0
	5	UN022790	-1.00809	1	-1.30118	1	0.195134	1	-6.20717	0.0145263		AT4G02530.1	---	chloroplast thylakoid lumen protein	71.55	3e-51
	5	UN028260	-0.816337	1	-1.37538	1	0.108668	1	-6.61263	0.00981077		AT1G22610.1	---	C2 calcium/lipid-binding plant phosphoribosyltransferase family protein	72.22	3e-56
	5	UN003607	-0.363063	1	-0.0102101	1	-0.00513431	1	-1.55811	0.00225315		AT3G04030.3	---	Homeodomain-like superfamily protein	53.56	2e-128
	5	UN003837	-0.753409	1	-0.201917	1	-0.107153	1	-2.63877	0.000419939		AT4G12420.1	SKU5	Cupredoxin superfamily protein	74.64	0
	5	UN006240	-1.17657	0.0157731	-0.31149	1	-0.113603	1	-3.76038	1		---	---	---	---	---
	5	UN002181	-0.406705	1	-0.0434169	1	0.120669	1	-1.65581	0.000299841		AT4G33300.1	ADR1-L1	ADR1-like 1	54.39	0
	5	UN003708	-1.70634	0.000482368	-0.512896	1	0.663387	0.865218	-7.00103	1.07984e-06		AT3G43190.1	SUS4, ATSUS4	sucrose synthase 4	76.34	0
	5	UN018641	-0.330418	1	-0.113267	1	0.27461	1	-2.3119	0.000151018		AT4G22360.1	---	SWIB complex BAF60b domain-containing protein	58.33	2e-14
	5	UN049099	-1.23874	1	-0.657341	1	0.587777	1	-6.55235	0.000235284		AT2G43590.1	---	Chitinase family protein	59.09	7e-31
	5	UN014556	---	---	-1.97438	1	-1.71985	1	-3.41946	4.37894e-05		AT1G63380.1	---	NAD(P)-binding Rossmann-fold superfamily protein	62.69	2e-24
	5	UN001884	-1.29804	0.00381368	-0.811444	1	-1.30509	0.0278634	-1.94457	0.141942		AT5G65700.1	BAM1	Leucine-rich receptor-like protein kinase family protein	75.64	0
	5	UN015088	-1.25301	0.0109752	-0.594483	1	-1.68337	0.0708596	-1.9051	0.248025		AT5G55730.1	FLA1	FASCICLIN-like arabinogalactan 1	65.16	2e-141
	5	UN031872	-2.06298	0.000557947	-0.830195	1	-2.24317	0.150019	-3.46767	1		AT4G08685.1	SAH7	Pollen Ole e 1 allergen and extensin family protein	57.05	7e-62
	5	UN052507	---	---	-0.21848	1	---	---	-1.70675	0.00495221		---	---	---	---	---
	5	UN005465	---	---	-0.759048	1	---	---	-2.39175	0.00024906		AT1G48310.1	CHR18, CHA18	CHR18, CHA18	61.57	0
	5	UN009636	-0.141788	1	0.70204	1	-0.938732	0.97279	-1.95946	0.0103622		AT2G37035.1	---	unknown protein; Has 26 Blast hits to 26 proteins in 11 species: Archae - 0; Bacteria - 0; Metazoa - 2; Fungi - 0; Plants - 23; Viruses - 0; Other Eukaryotes - 1 (source: NCBI BLink).	49.43	3e-69
	5	UN017031	-0.852609	1	0.795056	1	-1.38804	1	-3.70032	1.76839e-06		AT2G15320.1	---	Leucine-rich repeat (LRR) family protein	58.9	3e-98
	5	UN012518	-0.622916	0.478194	0.622179	1	-2.37989	0.00093705	-2.45692	1		AT3G26310.1	CYP71B35	cytochrome P450, family 71, subfamily B, polypeptide 35	39.13	1e-104
	5	UN022668	-0.463187	1	1.03645	1	-2.0728	1	-2.12999	0.00844693		---	---	---	---	---
	5	UN012019	-0.459381	0.900458	0.141284	1	-1.3409	0.0132982	-1.7351	0.0692716		---	---	---	---	---
	5	UN021231	-1.46484	1	0.977631	1	-4.23538	1	-6.10933	0.00219891		AT4G39230.1	---	NmrA-like negative transcriptional regulator family protein	49.34	2e-96
	5	UN006526	-1.00577	0.0455923	-0.145002	1	-2.75361	1.29458e-08	-4.11227	0.915089		AT3G10340.1	PAL4	phenylalanine ammonia-lyase 4	63.93	5e-16
	5	UN021440	-0.293106	1	-0.244327	1	-1.61012	0.0327201	-2.1542	1		AT3G04880.1	DRT102	DNA-damage-repair/toleration protein (DRT102)	66.55	1e-144
	5	UN017775	-1.07129	0.164136	-0.5583	1	-2.23217	2.66015e-07	-2.19391	1		AT1G11700.1	---	Protein of unknown function, DUF584	42.47	1e-34
	5	UN012131	-0.570381	0.835956	-0.710404	0.994462	-1.59112	0.000404234	-2.67469	1		AT3G09630.1	---	Ribosomal protein L4/L1 family	80.4	0
	5	UN013358	-0.532179	1	-0.601319	1	-1.07054	1	-2.04672	0.0445794		AT5G06800.1	---	myb-like HTH transcriptional regulator family protein	54.35	2e-57
	5	UN014002	-0.59651	1	-1.06025	1	-1.79922	0.0174184	-3.94593	1		AT1G71170.1	---	6-phosphogluconate dehydrogenase family protein	57.14	2e-92
	5	UN020133	-0.260534	1	-0.583351	1	-2.06564	0.978819	-3.92007	0.000406781		AT2G16130.1	PMT2, ATPMT2	polyol/monosaccharide transporter 2	70.25	6e-175
	5	UN010418	-0.511308	1	-0.642214	1	-1.90087	0.0103106	-2.96279	1		---	---	---	---	---
	5	UN008583	-0.776247	0.96567	-0.948941	1	-1.52679	0.0997471	-1.81645	0.00016634		AT3G10760.1	---	Homeodomain-like superfamily protein	53.68	2e-53
	5	UN031894	-0.87069	0.76288	-1.19481	0.950485	-1.99329	0.00207819	-2.55299	1		AT4G36020.1	CSDP1	cold shock domain protein 1	65.33	4e-30
	5	UN010086	0.903961	0.0690486	-0.657222	1	-2.1957	0.0362203	-2.27858	1		AT5G23960.1	ATTPS21, TPS21	terpene synthase 21	40.66	1e-133
	5	UN020130	0.268474	1	-1.27971	1	-3.08659	0.0372371	-2.57207	1		AT2G12190.1	---	Cytochrome P450 superfamily protein	57.4	4e-153
	5	UN011920	0.0226805	1	-0.260439	1	-1.54615	0.00430312	-1.85793	1		AT5G24930.1	ATCOL4, COL4	CONSTANS-like 4	46.49	1e-91
	5	UN020396	0.476702	1	-0.986863	1	-2.58234	1	-3.03051	2.97684e-05		AT2G42080.1	---	Chaperone DnaJ-domain superfamily protein	38.82	3e-44
	5	UN034055	-0.635785	0.410773	-1.52321	1	-5.75462	3.83256e-15	-3.12213	1		---	---	---	---	---
	5	UN008196	0.0655007	1	0.186799	1	-1.33325	0.0311508	-2.3753	1		AT4G34200.1	EDA9	D-3-phosphoglycerate dehydrogenase	82.01	0
	5	UN009194	0.0962363	1	0.21007	1	-1.89449	0.00164214	-3.18554	1		AT3G26590.1	---	MATE efflux family protein	73.52	0
	5	UN013786	0.772772	1	-0.402628	1	-3.72984	0.454012	-6.28115	0.0460495		AT2G45550.1	CYP76C4	cytochrome P450, family 76, subfamily C, polypeptide 4	47.15	2e-151
	5	UN020316	0.246737	1	-0.0816379	1	-1.65017	1	-2.94789	0.0013434		AT1G03620.1	---	ELMO/CED-12 family protein	81.05	2e-117
	5	UN013369	0.563157	0.88241	0.296574	1	-1.79173	0.0095585	-3.12858	1		AT4G01070.1	GT72B1, UGT72B1	UDP-Glycosyltransferase superfamily protein	58.49	5e-167
	5	UN016883	0.89035	0.431141	0.404188	1	-1.96671	0.0360954	-3.08382	1		AT5G17540.1	---	HXXXD-type acyl-transferase family protein	47.78	2e-142
	5	UN022527	1.37265	0.0600492	0.133748	1	-2.58289	0.0438227	-4.73068	0.00118685		---	---	---	---	---
	5	UN010868	0.294628	1	0.545204	1	-2.44645	0.00492768	-2.9625	1		AT2G38290.1	ATAMT2, AMT2;1, AMT2	ammonium transporter 2	62.81	0
	5	UN019169	-0.125903	1	0.441178	1	-1.9709	2.86338e-05	-2.26775	1		AT1G75290.1	---	NAD(P)-binding Rossmann-fold superfamily protein	41.45	6e-88
	5	UN009971	-0.0562491	1	0.111508	1	-1.93353	0.00996212	-2.20233	1		AT3G60630.1	HAM2, ATHAM2, LOM2	GRAS family transcription factor	43.88	4e-16
	5	UN021913	0.0617954	1	-0.0593917	1	-2.06032	0.0259648	-2.11227	1		AT2G36110.1	---	Polynucleotidyl transferase, ribonuclease H-like superfamily protein	38.12	8e-31
	5	UN012185	0.427768	1	-0.00056985	1	-1.78599	0.00137187	-2.22468	0.689934		AT3G04930.1	---	DNA-binding storekeeper protein-related transcriptional regulator	74.76	2e-47
	5	UN011518	1.22955	0.0199902	0.394705	1	-1.97971	0.0138772	-2.26766	1		AT5G65380.1	---	MATE efflux family protein	65.48	0
	5	UN011315	1.70936	1	1.07573	1	-2.34331	1	-3.33948	0.0294157		AT5G53635.1	---	F-box/RNI-like/FBD-like domains-containing protein	32.98	4e-18
	5	UN008132	0.696552	1	0.477929	1	-1.02994	1	-1.85357	0.0433346		---	---	---	---	---
	5	UN034104	0.96755	0.00554169	0.618267	1	-1.40297	0.0152702	-2.57111	0.867309		AT4G05050.1	UBQ11	ubiquitin 11	100	1e-93
	5	UN013374	1.26469	0.00580924	-0.908945	1	-1.43759	0.94665	-4.65242	0.448631		AT5G42930.1	---	alpha/beta-Hydrolases superfamily protein	34.66	1e-83
	5	UN001787	0.657416	1	-1.97788	0.19648	-2.63514	0.01327	-6.56029	0.0699456		ATMG00560.1	RPL2	Nucleic acid-binding, OB-fold-like protein	69.86	4e-154
	5	UN017385	0.186074	1	-0.983736	1	---	---	-4.29044	0.00017573		AT2G03500.1	---	Homeodomain-like superfamily protein	53.94	2e-98
	5	UN021354	0.153782	1	---	---	-1.40771	1	-2.57042	0.000261547		AT2G01930.1	BPC1, BBR, ATBPC1	basic pentacysteine1	49.5	8e-84
	5	UN012217	1.20812	1	-1.47305	1	-2.58086	1	-4.36904	0.00321527		AT2G26710.1	BAS1, CYP734A1, CYP72B1	Cytochrome P450 superfamily protein	65.43	5e-28
	5	UN014321	0.727917	1	-1.21848	1	-1.54852	1	-2.75684	0.000851073		AT3G57980.1	---	DNA-binding bromodomain-containing protein	36.79	6e-58
	5	UN030381	1.16677	1	-1.35511	1	-2.07258	1	-2.87581	1.47235e-05		AT5G25830.1	GATA12	GATA transcription factor 12	43.9	4e-41
[truncated: 406 more rows]

## Sheet: Table S7
	Table S7. Over-represented GO terms on the list of differentially expressed genes (Gene Ontology enrichment analysis). GO terms from the three major gene ontology categories (Biological Processes, molecular function, and cellular component), were classified using g:Profiler web tool (https://biit.cs.ut.ee/gprofiler/gost) and the list of Arabidopsis locus from those protein identified like homolog…
	Term ID	Term name	Adjusted p-value	Term size	Intersection size (Arabidopsis Locus/Avocado Unigenes)	Intersections
						Arabidopsis Locus	Avocado UniGenes
	Molecular Function
	GO:0016491	oxidoreductase activity	1.21466e-11	1669	199|248	AT1G03475,AT1G05010,AT1G06620,AT1G08570,AT1G09090,AT1G11530,AT1G12570,AT1G13080,AT1G13440,AT1G14130,AT1G14190,AT1G14520,AT1G14550,AT1G15950,AT1G19250,AT1G19900,AT1G20020,AT1G20340,AT1G24540,AT1G28480,AT1G30040,AT1G31690,AT1G35720,AT1G42970,AT1G43800,AT1G44446,AT1G52340,AT1G53580,AT1G56000,AT1G59960,AT1G60420,AT1G60730,AT1G60950,AT1G61720,AT1G63380,AT1G64940,AT1G65930,AT1G70670,AT1G71170,AT1G71695…	UN015014,UN016716,UN037252,UN015151,UN015169,UN003334,UN029639,UN021385,UN012849,UN032381,UN014625,UN011250,UN018860,UN020668,UN025088,UN025395,UN015288,UN015379,UN006826,UN014685,UN028676,UN009339,UN031909,UN017849,UN006824,UN017825,UN011623,UN019877,UN008940,UN018609,UN015041,UN010470,UN028381,UN020106,UN005574,UN009318,UN026882,UN037210,UN006552,UN006541,UN014556,UN011203,UN009925,UN064416,UN0…
	GO:0003824	catalytic activity	3.77966e-11	10046	842|1065	AT1G01040,AT1G01050,AT1G02500,AT1G02520,AT1G02640,AT1G02850,AT1G03140,AT1G03475,AT1G04010,AT1G04040,AT1G04110,AT1G04680,AT1G05010,AT1G05180,AT1G05680,AT1G05700,AT1G05790,AT1G06410,AT1G06620,AT1G06750,AT1G06800,AT1G06840,AT1G07250,AT1G07430,AT1G07570,AT1G07650,AT1G08060,AT1G08080,AT1G08250,AT1G08410,AT1G08470,AT1G08570,AT1G08650,AT1G08980,AT1G09090,AT1G09750,AT1G09970,AT1G10430,AT1G10520,AT1G10600…	UN000173,UN029860,UN018949,UN005806,UN000802,UN028889,UN000988,UN002471,UN004408,UN012520,UN011558,UN015014,UN018851,UN024661,UN002827,UN013975,UN016716,UN005072,UN014632,UN003610,UN002218,UN000800,UN037252,UN009352,UN009257,UN023491,UN002405,UN002160,UN054935,UN010656,UN015927,UN018444,UN012900,UN041127,UN001957,UN000103,UN024968,UN020331,UN006761,UN009238,UN004799,UN014844,UN015151,UN015169,UN0…
	GO:0048037	cofactor binding	1.77595e-08	1142	140|178	AT1G05010,AT1G08060,AT1G12570,AT1G13080,AT1G13440,AT1G14190,AT1G14550,AT1G15820,AT1G15950,AT1G19250,AT1G24540,AT1G31690,AT1G42970,AT1G43710,AT1G44446,AT1G44575,AT1G60950,AT1G61720,AT1G64660,AT1G64940,AT1G65290,AT1G65930,AT1G71170,AT1G71695,AT1G75450,AT1G76470,AT1G76490,AT1G76690,AT1G77330,AT1G77760,AT2G01490,AT2G12190,AT2G20340,AT2G21280,AT2G22170,AT2G22250,AT2G26710,AT2G27690,AT2G29090,AT2G30490…	UN016716,UN000103,UN021385,UN012849,UN032381,UN011250,UN018860,UN025088,UN025395,UN016540,UN015288,UN015379,UN009339,UN006824,UN011623,UN008141,UN008940,UN023481,UN037210,UN006552,UN006541,UN011572,UN011203,UN009925,UN020060,UN064416,UN014002,UN035029,UN033960,UN016436,UN008602,UN070834,UN006004,UN022180,UN021032,UN003914,UN017955,UN020130,UN014897,UN011185,UN009057,UN014155,UN025010,UN032806,UN0…
	GO:0019904	protein domain specific binding	4.21839e-06	84	23|29	AT1G15820,AT1G20340,AT1G31330,AT1G32060,AT1G44575,AT1G51400,AT1G78300,AT2G06520,AT2G20260,AT2G28900,AT2G45180,AT2G46820,AT3G02520,AT3G26650,AT3G47470,AT3G61470,AT4G10340,AT4G12800,AT4G32260,AT5G01750,AT5G38410,AT5G38420,AT5G65430	UN016540,UN028676,UN015262,UN010701,UN023481,UN031027,UN031028,UN019372,UN022634,UN017613,UN025821,UN022917,UN030452,UN024685,UN024781,UN020192,UN020193,UN012945,UN017661,UN019548,UN018827,UN028998,UN026578,UN030646,UN017155,UN025402,UN021602,UN021603,UN013762
	GO:0043167	ion binding	7.09953e-06	6503	553|699	AT1G01040,AT1G01050,AT1G01490,AT1G02500,AT1G02520,AT1G04680,AT1G04945,AT1G05010,AT1G05150,AT1G05700,AT1G06620,AT1G06750,AT1G06840,AT1G07430,AT1G07570,AT1G07650,AT1G08060,AT1G08070,AT1G08080,AT1G08410,AT1G08650,AT1G09090,AT1G09970,AT1G10200,AT1G10430,AT1G10520,AT1G10600,AT1G10630,AT1G12430,AT1G12570,AT1G12770,AT1G13080,AT1G13440,AT1G14130,AT1G14190,AT1G14520,AT1G14550,AT1G15100,AT1G15520,AT1G15820…	UN000173,UN029860,UN018949,UN020618,UN026621,UN005806,UN000802,UN028889,UN000988,UN013975,UN015402,UN013978,UN016716,UN009588,UN003610,UN037252,UN009352,UN009257,UN002405,UN002160,UN010656,UN015927,UN018444,UN012900,UN041127,UN001957,UN000103,UN013892,UN024968,UN020331,UN004799,UN015290,UN003334,UN001706,UN019612,UN014657,UN008082,UN013057,UN026573,UN002060,UN021385,UN007934,UN012849,UN032381,UN0…
	GO:0046906	tetrapyrrole binding	5.36843e-05	431	61|82	AT1G13080,AT1G14550,AT1G15820,AT1G24540,AT1G44575,AT1G64940,AT1G71695,AT1G77760,AT2G12190,AT2G22170,AT2G26710,AT2G27690,AT2G29090,AT2G30490,AT2G34490,AT2G41480,AT2G44890,AT2G45510,AT2G45550,AT2G45570,AT3G01420,AT3G10520,AT3G14610,AT3G19270,AT3G26310,AT3G26330,AT3G47470,AT3G48310,AT3G56630,AT3G61040,AT3G61470,AT3G61880,AT4G10340,AT4G14965,AT4G22710,AT4G31940,AT4G35090,AT4G36220,AT4G36380,AT4G36430…	UN012849,UN025088,UN025395,UN016540,UN009339,UN023481,UN011203,UN009925,UN035029,UN033960,UN016436,UN003914,UN020130,UN025010,UN012217,UN010568,UN012909,UN012062,UN010429,UN016542,UN015307,UN019415,UN009513,UN013786,UN014613,UN039188,UN008334,UN015970,UN012048,UN012183,UN011745,UN012518,UN036024,UN013014,UN017661,UN012564,UN013632,UN011626,UN008915,UN019548,UN013060,UN012042,UN018827,UN032247,UN0…
	GO:0043169	cation binding	8.19476e-05	3700	334|414	AT1G01040,AT1G01050,AT1G01490,AT1G02500,AT1G04680,AT1G04945,AT1G05010,AT1G05150,AT1G06620,AT1G07430,AT1G08060,AT1G08070,AT1G08080,AT1G09090,AT1G10200,AT1G10430,AT1G10520,AT1G10600,AT1G10630,AT1G13080,AT1G13440,AT1G14130,AT1G14520,AT1G14550,AT1G15100,AT1G16120,AT1G17110,AT1G20340,AT1G21240,AT1G21651,AT1G24540,AT1G24620,AT1G29630,AT1G30040,AT1G30970,AT1G31690,AT1G35720,AT1G43800,AT1G44350,AT1G44446…	UN000173,UN029860,UN018949,UN020618,UN026621,UN005806,UN013975,UN015402,UN013978,UN016716,UN009588,UN037252,UN010656,UN015927,UN018444,UN012900,UN000103,UN013892,UN024968,UN020331,UN003334,UN019612,UN014657,UN008082,UN013057,UN026573,UN012849,UN032381,UN014625,UN020668,UN025088,UN025395,UN030009,UN033386,UN014497,UN002109,UN028676,UN010461,UN016843,UN009339,UN016929,UN022830,UN006169,UN017849,UN0…
	GO:0046872	metal ion binding	0.000109909	3685	332|409	AT1G01040,AT1G01050,AT1G01490,AT1G02500,AT1G04680,AT1G04945,AT1G05010,AT1G05150,AT1G06620,AT1G07430,AT1G08060,AT1G08070,AT1G08080,AT1G09090,AT1G10200,AT1G10430,AT1G10520,AT1G10600,AT1G10630,AT1G13080,AT1G13440,AT1G14130,AT1G14520,AT1G14550,AT1G15100,AT1G16120,AT1G17110,AT1G20340,AT1G21240,AT1G21651,AT1G24540,AT1G24620,AT1G29630,AT1G30040,AT1G30970,AT1G31690,AT1G35720,AT1G43800,AT1G44350,AT1G44446…	UN000173,UN029860,UN018949,UN020618,UN026621,UN005806,UN013975,UN015402,UN013978,UN016716,UN009588,UN037252,UN010656,UN015927,UN018444,UN012900,UN000103,UN013892,UN024968,UN020331,UN003334,UN019612,UN014657,UN008082,UN013057,UN026573,UN012849,UN032381,UN014625,UN020668,UN025088,UN025395,UN030009,UN033386,UN014497,UN002109,UN028676,UN010461,UN016843,UN009339,UN016929,UN022830,UN006169,UN017849,UN0…
	GO:0050662	coenzyme binding	0.0016495	487	62|79	AT1G05010,AT1G12570,AT1G13440,AT1G14190,AT1G15950,AT1G19250,AT1G42970,AT1G43710,AT1G61720,AT1G64660,AT1G65930,AT1G71170,AT1G75450,AT1G76470,AT1G76490,AT1G76690,AT1G77330,AT1G77760,AT2G01490,AT2G20340,AT2G21280,AT2G22250,AT2G30970,AT2G33590,AT2G33600,AT2G41510,AT2G44160,AT3G02280,AT3G02360,AT3G06350,AT3G17240,AT3G24170,AT3G26650,AT3G28490,AT3G51240,AT3G52880,AT3G56060,AT3G61440,AT3G61510,AT4G13930…	UN016716,UN021385,UN032381,UN011250,UN018860,UN015288,UN015379,UN011623,UN008141,UN006552,UN006541,UN011572,UN064416,UN014002,UN008602,UN070834,UN006004,UN022180,UN021032,UN003914,UN017955,UN014897,UN011185,UN009057,UN014155,UN032806,UN025705,UN016582,UN063287,UN027933,UN018683,UN050594,UN005088,UN017968,UN020972,UN010704,UN010703,UN007171,UN037875,UN010353,UN012945,UN018028,UN012930,UN014114,UN0…
	GO:0097159	organic cyclic compound binding	0.00368578	7585	610|744	AT1G01040,AT1G01060,AT1G01720,AT1G02500,AT1G02520,AT1G05180,AT1G05700,AT1G06750,AT1G06840,AT1G07210,AT1G07570,AT1G07650,AT1G08060,AT1G08360,AT1G08410,AT1G08650,AT1G08810,AT1G09250,AT1G09750,AT1G09970,AT1G10120,AT1G10200,AT1G10520,AT1G10630,AT1G11480,AT1G12430,AT1G12570,AT1G12770,AT1G12910,AT1G13080,AT1G13440,AT1G14190,AT1G14550,AT1G14650,AT1G14790,AT1G15520,AT1G15820,AT1G16120,AT1G17840,AT1G19100…	UN000173,UN029860,UN003240,UN016726,UN016249,UN005806,UN000802,UN028889,UN000988,UN005072,UN003610,UN009352,UN009257,UN002405,UN002160,UN018631,UN041127,UN001957,UN000103,UN028568,UN004799,UN015290,UN020364,UN033490,UN017428,UN001706,UN022010,UN019612,UN008082,UN026573,UN026363,UN002060,UN021385,UN007934,UN017579,UN012849,UN032381,UN011250,UN018860,UN025088,UN025395,UN002886,UN001302,UN002274,UN0…
	GO:0020037	heme binding	0.00383268	395	52|72	AT1G13080,AT1G14550,AT1G24540,AT1G64940,AT1G71695,AT1G77760,AT2G12190,AT2G22170,AT2G26710,AT2G27690,AT2G29090,AT2G30490,AT2G34490,AT2G41480,AT2G44890,AT2G45510,AT2G45550,AT2G45570,AT3G01420,AT3G10520,AT3G14610,AT3G19270,AT3G26310,AT3G26330,AT3G48310,AT3G56630,AT3G61040,AT3G61880,AT4G14965,AT4G22710,AT4G31940,AT4G35090,AT4G36220,AT4G36380,AT4G36430,AT4G37530,AT5G05340,AT5G06720,AT5G06900,AT5G07990…	UN012849,UN025088,UN025395,UN009339,UN011203,UN009925,UN035029,UN033960,UN016436,UN003914,UN020130,UN025010,UN012217,UN010568,UN012909,UN012062,UN010429,UN016542,UN015307,UN019415,UN009513,UN013786,UN014613,UN039188,UN008334,UN015970,UN012048,UN012183,UN011745,UN012518,UN036024,UN013014,UN012564,UN013632,UN011626,UN008915,UN013060,UN012042,UN032247,UN012738,UN010665,UN028811,UN012346,UN052663,UN0…
	GO:1901363	heterocyclic compound binding	0.00387034	7560	608|742	AT1G01040,AT1G01060,AT1G01720,AT1G02500,AT1G02520,AT1G05180,AT1G05700,AT1G06750,AT1G06840,AT1G07210,AT1G07570,AT1G07650,AT1G08060,AT1G08360,AT1G08410,AT1G08650,AT1G08810,AT1G09250,AT1G09750,AT1G09970,AT1G10120,AT1G10200,AT1G10520,AT1G10630,AT1G11480,AT1G12430,AT1G12570,AT1G12770,AT1G12910,AT1G13080,AT1G13440,AT1G14190,AT1G14550,AT1G14650,AT1G14790,AT1G15520,AT1G15820,AT1G16120,AT1G17840,AT1G19100…	UN000173,UN029860,UN003240,UN016726,UN016249,UN005806,UN000802,UN028889,UN000988,UN005072,UN003610,UN009352,UN009257,UN002405,UN002160,UN018631,UN041127,UN001957,UN000103,UN028568,UN004799,UN015290,UN020364,UN033490,UN017428,UN001706,UN022010,UN019612,UN008082,UN026573,UN026363,UN002060,UN021385,UN007934,UN017579,UN012849,UN032381,UN011250,UN018860,UN025088,UN025395,UN002886,UN001302,UN002274,UN0…
	GO:0004497	monooxygenase activity	0.00676678	321	44|65	AT1G13080,AT1G19250,AT1G24540,AT1G44446,AT1G64940,AT1G70670,AT2G12190,AT2G26710,AT2G27690,AT2G29090,AT2G30490,AT2G34490,AT2G44890,AT2G45510,AT2G45550,AT2G45570,AT3G02280,AT3G12900,AT3G14610,AT3G19270,AT3G26310,AT3G26330,AT3G48310,AT3G56630,AT3G61040,AT3G61880,AT4G12110,AT4G22710,AT4G31940,AT4G36220,AT4G36380,AT5G05320,AT5G06900,AT5G07800,AT5G07990,AT5G23190,AT5G24530,AT5G38410,AT5G38420,AT5G42650…	UN012849,UN015379,UN009339,UN008940,UN011203,UN009925,UN036725,UN020130,UN012217,UN010568,UN012909,UN012062,UN010429,UN015307,UN019415,UN009513,UN013786,UN014613,UN039188,UN020972,UN018640,UN012048,UN012183,UN011745,UN012518,UN036024,UN013014,UN012564,UN013632,UN011626,UN008915,UN013060,UN012042,UN017058,UN012738,UN010665,UN028811,UN012346,UN036743,UN008077,UN027802,UN014419,UN017982,UN017931,UN0…
	GO:0046914	transition metal ion binding	0.0105022	1290	129|162	AT1G05010,AT1G08070,AT1G08080,AT1G10630,AT1G13080,AT1G13440,AT1G14520,AT1G20340,AT1G24540,AT1G31690,AT1G35720,AT1G44446,AT1G54490,AT1G63770,AT1G64260,AT1G64940,AT1G65290,AT1G65930,AT1G67740,AT1G69740,AT1G70170,AT1G73960,AT1G74770,AT1G75560,AT1G76160,AT1G77120,AT1G77760,AT1G78600,AT2G12190,AT2G19260,AT2G22070,AT2G22740,AT2G26710,AT2G27690,AT2G29090,AT2G30490,AT2G30860,AT2G30970,AT2G34490,AT2G34770…	UN016716,UN013892,UN024968,UN020331,UN026573,UN012849,UN032381,UN020668,UN028676,UN009339,UN006824,UN017825,UN008940,UN001757,UN002728,UN002857,UN011203,UN009925,UN020060,UN064416,UN025207,UN014656,UN023228,UN000547,UN000627,UN009111,UN009047,UN025926,UN014086,UN003914,UN007168,UN007206,UN014196,UN020130,UN005949,UN017356,UN003482,UN012217,UN010568,UN012909,UN012062,UN040407,UN025705,UN010429,UN0…
	GO:0016829	lyase activity	0.0209873	474	57|75	AT1G04680,AT1G08080,AT1G08250,AT1G08470,AT1G10520,AT1G14180,AT1G15380,AT1G34040,AT1G43710,AT1G56500,AT1G61120,AT1G61680,AT1G64660,AT1G65520,AT1G67750,AT1G69740,AT1G78570,AT1G80160,AT2G02220,AT2G02990,AT2G20340,AT2G26800,AT2G30390,AT2G36530,AT2G37040,AT2G41460,AT2G43870,AT3G06350,AT3G10340,AT3G14460,AT3G24255,AT3G27400,AT3G45590,AT3G51440,AT3G53260,AT3G61440,AT3G61490,AT4G13710,AT4G16740,AT4G20050…	UN013975,UN024968,UN020331,UN006761,UN009238,UN014844,UN008082,UN004858,UN019496,UN010969,UN008141,UN001672,UN005692,UN004112,UN009299,UN011572,UN027312,UN015976,UN065202,UN028600,UN014656,UN005196,UN017429,UN020612,UN028376,UN009918,UN019401,UN014897,UN011185,UN009057,UN010447,UN037749,UN038368,UN005000,UN010677,UN017678,UN007171,UN006526,UN010031,UN001230,UN002641,UN034360,UN034616,UN010989,UN0…
	GO:0016705	oxidoreductase activity, acting on paired donors, with incorporation or reduction of molecular oxygen	0.028363	393	49|68	AT1G13080,AT1G19250,AT1G24540,AT1G30040,AT1G43800,AT1G64940,AT2G01490,AT2G12190,AT2G26710,AT2G27690,AT2G29090,AT2G30490,AT2G34490,AT2G43710,AT2G44890,AT2G45510,AT2G45550,AT2G45570,AT3G02280,AT3G12120,AT3G12900,AT3G14610,AT3G19270,AT3G26310,AT3G26330,AT3G28490,AT3G48310,AT3G51240,AT3G56630,AT3G61040,AT3G61880,AT4G12110,AT4G22710,AT4G22880,AT4G27030,AT4G31940,AT4G36220,AT4G36380,AT5G05580,AT5G06900…	UN012849,UN015379,UN009339,UN017849,UN019877,UN011203,UN009925,UN017955,UN020130,UN012217,UN010568,UN012909,UN012062,UN010429,UN026283,UN015307,UN019415,UN009513,UN013786,UN014613,UN039188,UN020972,UN014831,UN018640,UN012048,UN012183,UN011745,UN012518,UN036024,UN013014,UN018028,UN012564,UN013632,UN012930,UN014114,UN011626,UN008915,UN013060,UN012042,UN017058,UN012738,UN013381,UN019603,UN010665,UN0…
	GO:0005506	iron ion binding	0.0375779	355	45|60	AT1G13080,AT1G14520,AT1G24540,AT1G44446,AT1G64940,AT2G12190,AT2G26710,AT2G27690,AT2G29090,AT2G30490,AT2G34490,AT2G34770,AT2G40300,AT2G44890,AT2G45510,AT2G45550,AT2G45570,AT3G14610,AT3G19270,AT3G26310,AT3G26330,AT3G28490,AT3G48310,AT3G56630,AT3G61040,AT3G61880,AT4G12110,AT4G19210,AT4G22710,AT4G25700,AT4G26260,AT4G31940,AT4G36220,AT4G36380,AT5G06900,AT5G07990,AT5G23190,AT5G42650,AT5G45340,AT5G51880…	UN012849,UN020668,UN009339,UN008940,UN011203,UN009925,UN020130,UN012217,UN010568,UN012909,UN012062,UN010429,UN020125,UN047113,UN015307,UN019415,UN009513,UN013786,UN014613,UN039188,UN012048,UN012183,UN011745,UN012518,UN036024,UN013014,UN018028,UN012564,UN013632,UN011626,UN008915,UN013060,UN012042,UN017058,UN007974,UN012738,UN020506,UN054778,UN010665,UN028811,UN012346,UN036743,UN008077,UN027802,UN0…
	GO:0016614	oxidoreductase activity, acting on CH-OH group of donors	0.0448773	205	30|42	AT1G12570,AT1G14190,AT1G15950,AT1G19900,AT1G52340,AT1G59960,AT1G61720,AT1G65930,AT1G71170,AT1G76470,AT1G76490,AT1G77120,AT2G23910,AT2G33590,AT2G33600,AT3G02360,AT3G06350,AT3G56060,AT4G17260,AT4G28570,AT4G29120,AT4G33360,AT4G34200,AT4G34230,AT4G39330,AT5G15490,AT5G42800,AT5G51930,AT5G51970,AT5G62790	UN021385,UN011250,UN018860,UN015288,UN006826,UN018609,UN028381,UN020106,UN006552,UN006541,UN064416,UN014002,UN070834,UN006004,UN025926,UN014086,UN017288,UN016935,UN016582,UN063287,UN027933,UN018683,UN050594,UN010704,UN010703,UN007171,UN025652,UN065257,UN008773,UN001498,UN015466,UN026963,UN011128,UN008196,UN012952,UN042698,UN010024,UN017274,UN016521,UN071460,UN014192,UN010241
	Biological process
	GO:0009628	response to abiotic stimulus	4.55594e-22	2343	287|393	AT1G01060,AT1G01720,AT1G02500,AT1G03060,AT1G05010,AT1G05180,AT1G05200,AT1G05680,AT1G08650,AT1G08810,AT1G09070,AT1G09090,AT1G10120,AT1G10140,AT1G10520,AT1G12110,AT1G12910,AT1G13080,AT1G13360,AT1G13740,AT1G14550,AT1G15100,AT1G15820,AT1G15950,AT1G17840,AT1G18260,AT1G19180,AT1G19250,AT1G19530,AT1G21760,AT1G22810,AT1G23710,AT1G24620,AT1G25550,AT1G29290,AT1G30040,AT1G30270,AT1G32060,AT1G32640,AT1G35210…	UN003240,UN016726,UN016249,UN005806,UN000022,UN016716,UN005072,UN003314,UN014632,UN015290,UN020364,UN012951,UN003334,UN022010,UN024417,UN008082,UN006512,UN017579,UN012849,UN019503,UN031561,UN007148,UN025088,UN025395,UN030009,UN033386,UN016540,UN015288,UN006133,UN077113,UN006488,UN016703,UN015379,UN039610,UN039609,UN019339,UN029108,UN013386,UN016929,UN022830,UN017116,UN031070,UN029073,UN017849,UN0…
	GO:0042221	response to chemical	1.68182e-20	3436	375|493	AT1G01060,AT1G01720,AT1G02500,AT1G03060,AT1G03475,AT1G05010,AT1G05180,AT1G05200,AT1G05680,AT1G07430,AT1G08650,AT1G08810,AT1G09070,AT1G09090,AT1G10140,AT1G10430,AT1G12110,AT1G13360,AT1G13440,AT1G13740,AT1G14550,AT1G14790,AT1G15100,AT1G15380,AT1G15460,AT1G15520,AT1G17180,AT1G17840,AT1G18260,AT1G19180,AT1G19250,AT1G19530,AT1G20020,AT1G20340,AT1G20925,AT1G21410,AT1G22810,AT1G23710,AT1G24020,AT1G25550…	UN003240,UN016726,UN016249,UN005806,UN000022,UN015014,UN016716,UN005072,UN003314,UN014632,UN010656,UN015927,UN018444,UN012900,UN015290,UN020364,UN012951,UN003334,UN024417,UN014657,UN006512,UN019503,UN031561,UN032381,UN007148,UN025088,UN025395,UN001302,UN030009,UN033386,UN019496,UN004933,UN002274,UN014144,UN000338,UN018711,UN037033,UN027854,UN006133,UN077113,UN006488,UN016703,UN015379,UN039610,UN0…
	GO:0050896	response to stimulus	1.289e-18	6742	623|817	AT1G01040,AT1G01060,AT1G01720,AT1G02500,AT1G03060,AT1G03475,AT1G05010,AT1G05180,AT1G05200,AT1G05680,AT1G06410,AT1G07430,AT1G07570,AT1G08060,AT1G08650,AT1G08810,AT1G09070,AT1G09090,AT1G09750,AT1G09970,AT1G10120,AT1G10140,AT1G10430,AT1G10520,AT1G11580,AT1G12110,AT1G12910,AT1G13080,AT1G13360,AT1G13440,AT1G13740,AT1G14550,AT1G14790,AT1G15100,AT1G15380,AT1G15460,AT1G15520,AT1G15820,AT1G15950,AT1G16120…	UN000173,UN029860,UN003240,UN016726,UN016249,UN005806,UN000022,UN015014,UN016716,UN005072,UN003314,UN014632,UN000800,UN010656,UN015927,UN018444,UN012900,UN041127,UN000103,UN015290,UN020364,UN012951,UN003334,UN017428,UN001706,UN022010,UN024417,UN014657,UN008082,UN013069,UN012311,UN006512,UN017579,UN012849,UN019503,UN031561,UN032381,UN007148,UN025088,UN025395,UN001302,UN030009,UN033386,UN019496,UN0…
	GO:0008152	metabolic process	8.80687e-17	13350	1067|1348	AT1G01040,AT1G01050,AT1G01060,AT1G01720,AT1G01800,AT1G02500,AT1G02640,AT1G02850,AT1G03140,AT1G03475,AT1G04010,AT1G04040,AT1G04110,AT1G04530,AT1G04680,AT1G05010,AT1G05180,AT1G05680,AT1G05700,AT1G05790,AT1G06410,AT1G06620,AT1G06750,AT1G06800,AT1G06840,AT1G07210,AT1G07430,AT1G07570,AT1G07650,AT1G07705,AT1G08060,AT1G08070,AT1G08250,AT1G08360,AT1G08380,AT1G08410,AT1G08470,AT1G08570,AT1G08650,AT1G08810…	UN000173,UN029860,UN018949,UN003240,UN016726,UN016249,UN071222,UN054987,UN005806,UN002471,UN004408,UN012520,UN011558,UN015014,UN018851,UN024661,UN002827,UN014044,UN013975,UN016716,UN005072,UN014632,UN003610,UN002218,UN000800,UN037252,UN009352,UN009257,UN023491,UN002405,UN002160,UN018631,UN010656,UN015927,UN018444,UN012900,UN041127,UN001957,UN039789,UN000103,UN013892,UN006761,UN009238,UN028568,UN0…
	GO:0006950	response to stress	8.83694e-16	3892	394|536	AT1G01040,AT1G01060,AT1G01720,AT1G02500,AT1G03060,AT1G05010,AT1G05180,AT1G05200,AT1G05680,AT1G06410,AT1G07570,AT1G08060,AT1G08810,AT1G09070,AT1G09090,AT1G09750,AT1G09970,AT1G10140,AT1G10520,AT1G11580,AT1G12110,AT1G13080,AT1G13360,AT1G13440,AT1G13740,AT1G14550,AT1G14790,AT1G15100,AT1G15520,AT1G15950,AT1G17840,AT1G18260,AT1G19100,AT1G19180,AT1G19250,AT1G19530,AT1G19640,AT1G20020,AT1G20510,AT1G21760…	UN000173,UN029860,UN003240,UN016726,UN016249,UN005806,UN000022,UN016716,UN005072,UN003314,UN014632,UN000800,UN041127,UN000103,UN020364,UN012951,UN003334,UN017428,UN001706,UN024417,UN008082,UN013069,UN012311,UN006512,UN012849,UN019503,UN031561,UN032381,UN007148,UN025088,UN025395,UN001302,UN030009,UN033386,UN002274,UN014144,UN000338,UN018711,UN037033,UN015288,UN006133,UN077113,UN006488,UN008002,UN0…
	GO:1901700	response to oxygen-containing compound	1.83936e-14	1808	216|286	AT1G01060,AT1G01720,AT1G03060,AT1G05010,AT1G05180,AT1G05200,AT1G05680,AT1G07430,AT1G08650,AT1G08810,AT1G10430,AT1G12110,AT1G13740,AT1G14790,AT1G15100,AT1G15380,AT1G15520,AT1G17840,AT1G19180,AT1G22810,AT1G24020,AT1G28480,AT1G29290,AT1G30270,AT1G32450,AT1G32540,AT1G32640,AT1G34190,AT1G34670,AT1G35720,AT1G42970,AT1G44350,AT1G45249,AT1G50420,AT1G51400,AT1G52340,AT1G52570,AT1G52760,AT1G60900,AT1G61120…	UN003240,UN016726,UN016249,UN000022,UN016716,UN005072,UN003314,UN014632,UN010656,UN015927,UN018444,UN012900,UN015290,UN020364,UN014657,UN006512,UN007148,UN001302,UN030009,UN033386,UN019496,UN002274,UN014144,UN000338,UN018711,UN037033,UN006133,UN077113,UN016703,UN029108,UN035408,UN030129,UN034348,UN020938,UN029754,UN046721,UN029435,UN031909,UN031070,UN029073,UN005530,UN007404,UN006020,UN028599,UN0…
	GO:0055114	oxidation-reduction process	2.67073e-14	1848	219|275	AT1G01800,AT1G03475,AT1G05010,AT1G06620,AT1G08380,AT1G08570,AT1G09090,AT1G10430,AT1G12570,AT1G13080,AT1G13440,AT1G13700,AT1G14130,AT1G14190,AT1G14520,AT1G14550,AT1G15950,AT1G19250,AT1G19530,AT1G19900,AT1G20020,AT1G20340,AT1G24540,AT1G27680,AT1G28480,AT1G30040,AT1G31690,AT1G42970,AT1G43800,AT1G44446,AT1G52340,AT1G53580,AT1G56000,AT1G59960,AT1G60420,AT1G60730,AT1G60950,AT1G61720,AT1G63380,AT1G64940…	UN071222,UN054987,UN015014,UN016716,UN037252,UN031573,UN015151,UN015169,UN003334,UN014657,UN021385,UN012849,UN032381,UN014483,UN016117,UN014625,UN011250,UN018860,UN020668,UN025088,UN025395,UN015288,UN015379,UN039610,UN039609,UN006826,UN014685,UN028676,UN009339,UN004023,UN031909,UN017849,UN006824,UN011623,UN019877,UN008940,UN018609,UN015041,UN010470,UN028381,UN020106,UN005574,UN009318,UN026882,UN0…
	GO:0010033	response to organic substance	8.34181e-11	2276	243|313	AT1G01060,AT1G01720,AT1G03060,AT1G03475,AT1G05010,AT1G05180,AT1G05200,AT1G05680,AT1G07430,AT1G08650,AT1G08810,AT1G10430,AT1G12110,AT1G13740,AT1G14790,AT1G15100,AT1G15380,AT1G15520,AT1G17840,AT1G18260,AT1G19180,AT1G20020,AT1G20925,AT1G21410,AT1G22810,AT1G24020,AT1G28480,AT1G29290,AT1G30330,AT1G30690,AT1G32060,AT1G32640,AT1G34670,AT1G35710,AT1G35720,AT1G42970,AT1G44350,AT1G45249,AT1G48410,AT1G50420…	UN003240,UN016726,UN016249,UN000022,UN015014,UN016716,UN005072,UN003314,UN014632,UN010656,UN015927,UN018444,UN012900,UN015290,UN020364,UN014657,UN006512,UN007148,UN001302,UN030009,UN033386,UN019496,UN002274,UN014144,UN000338,UN018711,UN037033,UN006133,UN077113,UN006488,UN016703,UN014685,UN011006,UN018102,UN029108,UN035408,UN030129,UN034348,UN020938,UN029754,UN046721,UN029435,UN031909,UN031070,UN0…
	GO:0009987	cellular process	1.16336e-10	14475	1108|1371	AT1G01040,AT1G01050,AT1G01060,AT1G01720,AT1G02500,AT1G02640,AT1G03060,AT1G03140,AT1G03475,AT1G04010,AT1G04040,AT1G04110,AT1G04530,AT1G04680,AT1G05010,AT1G05180,AT1G05200,AT1G05680,AT1G05700,AT1G06410,AT1G06750,AT1G06840,AT1G07210,AT1G07430,AT1G07570,AT1G07650,AT1G07705,AT1G08060,AT1G08070,AT1G08250,AT1G08360,AT1G08380,AT1G08410,AT1G08570,AT1G08650,AT1G08810,AT1G08980,AT1G09070,AT1G09090,AT1G09250…	UN000173,UN029860,UN018949,UN003240,UN016726,UN016249,UN005806,UN002471,UN004408,UN000022,UN011558,UN015014,UN018851,UN024661,UN002827,UN014044,UN013975,UN016716,UN005072,UN003314,UN014632,UN003610,UN000800,UN009352,UN009257,UN002405,UN002160,UN018631,UN010656,UN015927,UN018444,UN012900,UN041127,UN001957,UN039789,UN000103,UN013892,UN006761,UN009238,UN028568,UN031573,UN004799,UN015151,UN015169,UN0…
	GO:0010035	response to inorganic substance	7.19821e-10	1016	130|170	AT1G01060,AT1G02500,AT1G05010,AT1G05180,AT1G05680,AT1G08810,AT1G12110,AT1G13440,AT1G13740,AT1G15520,AT1G20340,AT1G22810,AT1G30270,AT1G32450,AT1G32540,AT1G32640,AT1G34190,AT1G35720,AT1G42970,AT1G45249,AT1G51340,AT1G51400,AT1G52340,AT1G52760,AT1G60420,AT1G61120,AT1G62400,AT1G62660,AT1G63490,AT1G63770,AT1G64660,AT1G65930,AT1G66340,AT1G68090,AT1G68560,AT1G70170,AT1G70520,AT1G70670,AT1G74910,AT1G77120…	UN003240,UN005806,UN016716,UN005072,UN014632,UN020364,UN006512,UN032381,UN007148,UN002274,UN014144,UN000338,UN018711,UN037033,UN028676,UN029108,UN005530,UN007404,UN006020,UN028599,UN004785,UN001297,UN011298,UN017825,UN011623,UN017851,UN009048,UN031027,UN031028,UN018609,UN024890,UN005574,UN009318,UN005692,UN004112,UN017872,UN031736,UN006720,UN000216,UN002728,UN011572,UN064416,UN004924,UN016070,UN0…
	GO:0001101	response to acid chemical	1.34366e-09	1357	160|217	AT1G01060,AT1G01720,AT1G03060,AT1G05010,AT1G05180,AT1G05200,AT1G05680,AT1G07430,AT1G08650,AT1G08810,AT1G10430,AT1G12110,AT1G13740,AT1G14790,AT1G15100,AT1G15380,AT1G15520,AT1G17840,AT1G19180,AT1G22810,AT1G24020,AT1G28480,AT1G30270,AT1G32450,AT1G32640,AT1G34670,AT1G35720,AT1G44350,AT1G45249,AT1G50420,AT1G51400,AT1G52340,AT1G52570,AT1G60900,AT1G61120,AT1G62660,AT1G63490,AT1G64660,AT1G65790,AT1G66340…	UN003240,UN016726,UN016249,UN000022,UN016716,UN005072,UN003314,UN014632,UN010656,UN015927,UN018444,UN012900,UN015290,UN020364,UN014657,UN006512,UN007148,UN001302,UN030009,UN033386,UN019496,UN002274,UN014144,UN000338,UN018711,UN037033,UN006133,UN077113,UN016703,UN029108,UN035408,UN030129,UN034348,UN020938,UN029754,UN046721,UN029435,UN031909,UN005530,UN007404,UN006020,UN004785,UN001297,UN038968,UN0…
	GO:0044237	cellular metabolic process	7.13584e-09	11604	910|1133	AT1G01040,AT1G01050,AT1G01060,AT1G01720,AT1G02500,AT1G02640,AT1G03140,AT1G03475,AT1G04010,AT1G04040,AT1G04530,AT1G04680,AT1G05010,AT1G05180,AT1G05680,AT1G05700,AT1G06410,AT1G06750,AT1G06840,AT1G07210,AT1G07430,AT1G07570,AT1G07650,AT1G07705,AT1G08060,AT1G08070,AT1G08250,AT1G08360,AT1G08380,AT1G08410,AT1G08650,AT1G08810,AT1G08980,AT1G09250,AT1G09970,AT1G10120,AT1G10430,AT1G10520,AT1G10600,AT1G11480…	UN000173,UN029860,UN018949,UN003240,UN016726,UN016249,UN005806,UN002471,UN004408,UN011558,UN015014,UN018851,UN024661,UN014044,UN013975,UN016716,UN005072,UN014632,UN003610,UN000800,UN009352,UN009257,UN002405,UN002160,UN018631,UN010656,UN015927,UN018444,UN012900,UN041127,UN001957,UN039789,UN000103,UN013892,UN006761,UN009238,UN028568,UN031573,UN004799,UN015290,UN020364,UN032858,UN033490,UN001706,UN0…
	GO:0009719	response to endogenous stimulus	7.83616e-09	1938	207|267	AT1G01060,AT1G01720,AT1G03060,AT1G03475,AT1G05010,AT1G05180,AT1G05200,AT1G05680,AT1G07430,AT1G08650,AT1G08810,AT1G10430,AT1G12110,AT1G13740,AT1G14790,AT1G15100,AT1G15380,AT1G15520,AT1G17840,AT1G19180,AT1G20020,AT1G20925,AT1G21410,AT1G22810,AT1G24020,AT1G28480,AT1G30330,AT1G30690,AT1G32060,AT1G32640,AT1G34670,AT1G35710,AT1G35720,AT1G44350,AT1G45249,AT1G48410,AT1G50420,AT1G50640,AT1G52570,AT1G56150…	UN003240,UN016726,UN016249,UN000022,UN015014,UN016716,UN005072,UN003314,UN014632,UN010656,UN015927,UN018444,UN012900,UN015290,UN020364,UN014657,UN006512,UN007148,UN001302,UN030009,UN033386,UN019496,UN002274,UN014144,UN000338,UN018711,UN037033,UN006133,UN077113,UN016703,UN014685,UN011006,UN018102,UN029108,UN035408,UN030129,UN034348,UN020938,UN029754,UN046721,UN029435,UN031909,UN010741,UN006280,UN0…
	GO:0009725	response to hormone	1.32044e-08	1901	203|263	AT1G01060,AT1G01720,AT1G03060,AT1G03475,AT1G05010,AT1G05180,AT1G05680,AT1G07430,AT1G08650,AT1G08810,AT1G10430,AT1G12110,AT1G13740,AT1G14790,AT1G15100,AT1G15380,AT1G15520,AT1G17840,AT1G19180,AT1G20020,AT1G20925,AT1G21410,AT1G22810,AT1G24020,AT1G28480,AT1G30330,AT1G30690,AT1G32060,AT1G32640,AT1G34670,AT1G35710,AT1G35720,AT1G44350,AT1G45249,AT1G48410,AT1G50420,AT1G50640,AT1G52570,AT1G56150,AT1G59750…	UN003240,UN016726,UN016249,UN000022,UN015014,UN016716,UN005072,UN014632,UN010656,UN015927,UN018444,UN012900,UN015290,UN020364,UN014657,UN006512,UN007148,UN001302,UN030009,UN033386,UN019496,UN002274,UN014144,UN000338,UN018711,UN037033,UN006133,UN077113,UN016703,UN014685,UN011006,UN018102,UN029108,UN035408,UN030129,UN034348,UN020938,UN029754,UN046721,UN029435,UN031909,UN010741,UN006280,UN010270,UN0…
	GO:0019752	carboxylic acid metabolic process	1.04954e-07	1114	132|158	AT1G03475,AT1G05680,AT1G08250,AT1G08980,AT1G10430,AT1G13280,AT1G13440,AT1G14520,AT1G19250,AT1G19640,AT1G20510,AT1G20780,AT1G22170,AT1G22410,AT1G30040,AT1G43710,AT1G43800,AT1G44350,AT1G52340,AT1G55920,AT1G64660,AT1G65290,AT1G65520,AT1G65890,AT1G65930,AT1G68320,AT1G71170,AT1G73805,AT1G74910,AT1G76550,AT1G76690,AT1G77590,AT1G79900,AT2G01490,AT2G02380,AT2G04240,AT2G17630,AT2G20340,AT2G22250,AT2G22480…	UN015014,UN014632,UN006761,UN009238,UN032858,UN014657,UN018770,UN032381,UN020668,UN015379,UN018639,UN007958,UN000417,UN010832,UN008795,UN017849,UN008141,UN019877,UN008885,UN018609,UN016004,UN011572,UN020060,UN027312,UN008273,UN064416,UN013582,UN014002,UN011859,UN011319,UN007660,UN022180,UN004897,UN005132,UN004321,UN017955,UN013561,UN021906,UN014382,UN014897,UN011185,UN009057,UN032806,UN005604,UN0…
	GO:0071704	organic substance metabolic process	1.28028e-07	11832	917|1160	AT1G01040,AT1G01050,AT1G01060,AT1G01720,AT1G02500,AT1G02640,AT1G02850,AT1G03140,AT1G03475,AT1G04010,AT1G04110,AT1G04530,AT1G04680,AT1G05010,AT1G05180,AT1G05680,AT1G05700,AT1G05790,AT1G06410,AT1G06800,AT1G06840,AT1G07210,AT1G07430,AT1G07570,AT1G07650,AT1G07705,AT1G08060,AT1G08070,AT1G08250,AT1G08360,AT1G08410,AT1G08650,AT1G08810,AT1G08980,AT1G09250,AT1G09750,AT1G09970,AT1G10120,AT1G10430,AT1G10520…	UN000173,UN029860,UN018949,UN003240,UN016726,UN016249,UN005806,UN002471,UN004408,UN012520,UN011558,UN015014,UN018851,UN002827,UN014044,UN013975,UN016716,UN005072,UN014632,UN003610,UN002218,UN000800,UN023491,UN002405,UN002160,UN018631,UN010656,UN015927,UN018444,UN012900,UN041127,UN001957,UN039789,UN000103,UN013892,UN006761,UN009238,UN028568,UN004799,UN015290,UN020364,UN032858,UN033490,UN017428,UN0…
	GO:0070887	cellular response to chemical stimulus	1.67316e-07	1787	189|248	AT1G01720,AT1G02500,AT1G03060,AT1G05010,AT1G05180,AT1G05200,AT1G05680,AT1G07430,AT1G08650,AT1G09070,AT1G09090,AT1G10140,AT1G10430,AT1G12110,AT1G13360,AT1G14550,AT1G15100,AT1G15380,AT1G15460,AT1G19180,AT1G19250,AT1G19530,AT1G20925,AT1G21410,AT1G22810,AT1G23710,AT1G24020,AT1G25550,AT1G28480,AT1G30040,AT1G30330,AT1G30690,AT1G32540,AT1G32640,AT1G34190,AT1G34670,AT1G35710,AT1G35720,AT1G43800,AT1G45249…	UN016726,UN016249,UN005806,UN000022,UN016716,UN005072,UN003314,UN014632,UN010656,UN015927,UN018444,UN012900,UN015290,UN012951,UN003334,UN024417,UN014657,UN006512,UN019503,UN031561,UN025088,UN025395,UN030009,UN033386,UN019496,UN004933,UN016703,UN015379,UN039610,UN039609,UN011006,UN018102,UN029108,UN013386,UN035408,UN030129,UN034348,UN020938,UN029754,UN046721,UN029435,UN017116,UN031909,UN017849,UN0…
	GO:0032787	monocarboxylic acid metabolic process	3.36692e-07	561	79|92	AT1G05680,AT1G08980,AT1G10430,AT1G13280,AT1G13440,AT1G19250,AT1G19640,AT1G20510,AT1G20780,AT1G22170,AT1G43800,AT1G44350,AT1G52340,AT1G65290,AT1G65520,AT1G65890,AT1G73805,AT1G76550,AT1G76690,AT1G77590,AT2G01490,AT2G04240,AT2G22480,AT2G23620,AT2G26560,AT2G26640,AT2G28880,AT2G29090,AT2G34770,AT2G36530,AT2G37040,AT2G41010,AT2G43710,AT3G01420,AT3G02360,AT3G06350,AT3G10340,AT3G10520,AT3G12120,AT3G14440…	UN014632,UN032858,UN014657,UN018770,UN032381,UN015379,UN018639,UN007958,UN000417,UN010832,UN019877,UN008885,UN018609,UN020060,UN027312,UN008273,UN011859,UN007660,UN022180,UN004897,UN005132,UN017955,UN021906,UN005604,UN017021,UN063313,UN010171,UN043516,UN036528,UN037239,UN002323,UN012909,UN020125,UN038368,UN005000,UN025243,UN026283,UN008334,UN010704,UN010703,UN007171,UN006526,UN015970,UN014831,UN0…
	GO:0006970	response to osmotic stress	7.79479e-07	696	91|117	AT1G01060,AT1G02500,AT1G03060,AT1G05010,AT1G05680,AT1G15100,AT1G17840,AT1G18260,AT1G29290,AT1G35720,AT1G45249,AT1G53210,AT1G53580,AT1G59960,AT1G60940,AT1G62660,AT1G65930,AT1G66340,AT1G68090,AT1G70170,AT1G72180,AT1G77120,AT1G78080,AT1G79900,AT2G01570,AT2G04240,AT2G18250,AT2G20360,AT2G20880,AT2G21660,AT2G33540,AT2G36530,AT2G40830,AT2G41010,AT2G42080,AT2G44450,AT2G46830,AT2G47180,AT3G02360,AT3G04720…	UN003240,UN005806,UN000022,UN016716,UN014632,UN030009,UN033386,UN006133,UN077113,UN006488,UN031070,UN029073,UN017825,UN017851,UN005345,UN015041,UN028381,UN020106,UN021010,UN031736,UN006720,UN064416,UN004924,UN016070,UN008982,UN023228,UN001192,UN001106,UN025926,UN014086,UN009988,UN004321,UN004596,UN021906,UN021810,UN012271,UN004140,UN054158,UN004757,UN038368,UN011426,UN025243,UN020396,UN013933,UN0…
	GO:0009611	response to wounding	9.33273e-07	205	40|62	AT1G01720,AT1G05200,AT1G17840,AT1G19180,AT1G19640,AT1G20510,AT1G32640,AT1G51400,AT1G61120,AT1G76690,AT1G78080,AT2G02990,AT2G20340,AT2G27690,AT2G28290,AT2G28900,AT3G14840,AT3G25230,AT3G29035,AT3G45140,AT3G51440,AT3G54420,AT3G61190,AT4G08170,AT4G08500,AT4G16740,AT4G20140,AT4G21440,AT4G22880,AT4G32940,AT5G06320,AT5G09810,AT5G13930,AT5G24090,AT5G42650,AT5G43470,AT5G43580,AT5G46050,AT5G50200,AT5G57280	UN016726,UN016249,UN003314,UN006133,UN077113,UN016703,UN018639,UN007958,UN004785,UN001297,UN031027,UN031028,UN005692,UN004112,UN022180,UN009988,UN019401,UN014897,UN011185,UN009057,UN010568,UN001544,UN022917,UN015172,UN015430,UN068425,UN000495,UN017026,UN033344,UN033343,UN033345,UN029835,UN040796,UN004582,UN009755,UN032851,UN001733,UN020048,UN013381,UN005583,UN026528,UN031005,UN011893,UN023848,UN0…
	GO:0044281	small molecule metabolic process	1.39192e-06	1883	193|223	AT1G02500,AT1G03475,AT1G05680,AT1G08250,AT1G08980,AT1G10430,AT1G11530,AT1G12110,AT1G13280,AT1G13440,AT1G14520,AT1G19250,AT1G19640,AT1G20510,AT1G20780,AT1G22170,AT1G22410,AT1G30040,AT1G42970,AT1G43710,AT1G43800,AT1G44350,AT1G51630,AT1G52340,AT1G55810,AT1G55920,AT1G56500,AT1G64660,AT1G65290,AT1G65520,AT1G65890,AT1G65930,AT1G68320,AT1G68570,AT1G68760,AT1G69850,AT1G69870,AT1G71170,AT1G71750,AT1G73805…	UN005806,UN015014,UN014632,UN006761,UN009238,UN032858,UN014657,UN029639,UN006512,UN018770,UN032381,UN020668,UN015379,UN018639,UN007958,UN000417,UN010832,UN008795,UN017849,UN011623,UN008141,UN019877,UN008885,UN018062,UN018609,UN012224,UN016004,UN001672,UN011572,UN020060,UN027312,UN008273,UN064416,UN013582,UN007526,UN024153,UN024789,UN008782,UN014002,UN021478,UN011859,UN012577,UN011319,UN006004,UN0…
	GO:0009651	response to salt stress	3.20153e-06	620	82|105	AT1G01060,AT1G02500,AT1G03060,AT1G05010,AT1G05680,AT1G15100,AT1G17840,AT1G18260,AT1G35720,AT1G45249,AT1G53210,AT1G53580,AT1G59960,AT1G60940,AT1G62660,AT1G65930,AT1G66340,AT1G68090,AT1G70170,AT1G77120,AT1G78080,AT2G01570,AT2G04240,AT2G18250,AT2G20360,AT2G20880,AT2G21660,AT2G33540,AT2G36530,AT2G40830,AT2G41010,AT2G42080,AT2G44450,AT2G46830,AT2G47180,AT3G02360,AT3G04720,AT3G05030,AT3G06590,AT3G14440…	UN003240,UN005806,UN000022,UN016716,UN014632,UN030009,UN033386,UN006133,UN077113,UN006488,UN017825,UN017851,UN005345,UN015041,UN028381,UN020106,UN021010,UN031736,UN006720,UN064416,UN004924,UN016070,UN008982,UN023228,UN025926,UN014086,UN009988,UN004596,UN021906,UN021810,UN012271,UN004140,UN054158,UN004757,UN038368,UN011426,UN025243,UN020396,UN013933,UN003358,UN017912,UN010704,UN010703,UN025933,UN0…
	GO:0006082	organic acid metabolic process	5.34551e-06	1289	141|169	AT1G03475,AT1G05680,AT1G08250,AT1G08980,AT1G10430,AT1G12110,AT1G13280,AT1G13440,AT1G14520,AT1G19250,AT1G19640,AT1G20510,AT1G20780,AT1G22170,AT1G22410,AT1G30040,AT1G43710,AT1G43800,AT1G44350,AT1G52340,AT1G55920,AT1G64660,AT1G65290,AT1G65520,AT1G65890,AT1G65930,AT1G68320,AT1G68570,AT1G69850,AT1G69870,AT1G71170,AT1G73805,AT1G74910,AT1G76550,AT1G76690,AT1G77590,AT1G77760,AT1G79900,AT2G01490,AT2G02380…	UN015014,UN014632,UN006761,UN009238,UN032858,UN014657,UN006512,UN018770,UN032381,UN020668,UN015379,UN018639,UN007958,UN000417,UN010832,UN008795,UN017849,UN008141,UN019877,UN008885,UN018609,UN016004,UN011572,UN020060,UN027312,UN008273,UN064416,UN013582,UN007526,UN024789,UN008782,UN014002,UN011859,UN011319,UN007660,UN022180,UN004897,UN005132,UN003914,UN004321,UN017955,UN013561,UN021906,UN014382,UN0…
	GO:0017144	drug metabolic process	6.00182e-06	671	86|121	AT1G02500,AT1G04680,AT1G08250,AT1G11580,AT1G14550,AT1G26850,AT1G28240,AT1G32070,AT1G33170,AT1G51630,AT1G53580,AT1G64660,AT1G66340,AT1G67750,AT1G71695,AT1G73805,AT1G77120,AT1G77760,AT1G78240,AT1G80050,AT2G02380,AT2G20340,AT2G22240,AT2G22250,AT2G23620,AT2G26800,AT2G28880,AT2G37040,AT2G38280,AT2G41010,AT2G41480,AT2G43590,AT2G44450,AT3G07970,AT3G10340,AT3G12500,AT3G17390,AT3G27400,AT3G47340,AT3G49220…	UN005806,UN013975,UN006761,UN009238,UN013069,UN012311,UN025088,UN025395,UN006309,UN003635,UN022800,UN026979,UN009279,UN018062,UN015041,UN011572,UN004924,UN015976,UN065202,UN028600,UN035029,UN033960,UN016436,UN011859,UN025926,UN014086,UN003914,UN002308,UN008573,UN013561,UN014897,UN011185,UN009057,UN010775,UN011951,UN032806,UN017021,UN010447,UN002323,UN005000,UN002777,UN025243,UN016542,UN049099,UN0…
	GO:0043436	oxoacid metabolic process	6.12683e-06	1280	140|168	AT1G03475,AT1G05680,AT1G08250,AT1G08980,AT1G10430,AT1G12110,AT1G13280,AT1G13440,AT1G14520,AT1G19250,AT1G19640,AT1G20510,AT1G20780,AT1G22170,AT1G22410,AT1G30040,AT1G43710,AT1G43800,AT1G44350,AT1G52340,AT1G55920,AT1G64660,AT1G65290,AT1G65520,AT1G65890,AT1G65930,AT1G68320,AT1G68570,AT1G69850,AT1G69870,AT1G71170,AT1G73805,AT1G74910,AT1G76550,AT1G76690,AT1G77590,AT1G77760,AT1G79900,AT2G01490,AT2G02380…	UN015014,UN014632,UN006761,UN009238,UN032858,UN014657,UN006512,UN018770,UN032381,UN020668,UN015379,UN018639,UN007958,UN000417,UN010832,UN008795,UN017849,UN008141,UN019877,UN008885,UN018609,UN016004,UN011572,UN020060,UN027312,UN008273,UN064416,UN013582,UN007526,UN024789,UN008782,UN014002,UN011859,UN011319,UN007660,UN022180,UN004897,UN005132,UN003914,UN004321,UN017955,UN013561,UN021906,UN014382,UN0…
	GO:0005975	carbohydrate metabolic process	6.83702e-06	1212	134|176	AT1G01050,AT1G02640,AT1G02850,AT1G04680,AT1G06410,AT1G11545,AT1G11580,AT1G13130,AT1G13440,AT1G13700,AT1G14520,AT1G19940,AT1G22170,AT1G23870,AT1G26560,AT1G26850,AT1G27680,AT1G28240,AT1G30080,AT1G32060,AT1G32170,AT1G32900,AT1G33170,AT1G42430,AT1G42970,AT1G48100,AT1G51630,AT1G55850,AT1G61820,AT1G62660,AT1G64390,AT1G65290,AT1G67750,AT1G68130,AT1G68560,AT1G70230,AT1G74910,AT1G76550,AT1G78060,AT1G78240…	UN018949,UN002471,UN004408,UN012520,UN013975,UN000800,UN035224,UN013069,UN012311,UN009507,UN032381,UN014483,UN016117,UN020668,UN007258,UN010832,UN002813,UN012778,UN006309,UN004023,UN003635,UN022800,UN013388,UN010701,UN010148,UN006079,UN009279,UN007149,UN015073,UN013389,UN011623,UN009664,UN011570,UN018062,UN069152,UN010459,UN031736,UN006720,UN005321,UN025525,UN020060,UN015976,UN065202,UN028600,UN0…
	GO:0033993	response to lipid	1.21693e-05	868	103|130	AT1G01060,AT1G01720,AT1G03060,AT1G05010,AT1G05680,AT1G07430,AT1G08650,AT1G08810,AT1G10430,AT1G13740,AT1G15100,AT1G15380,AT1G17840,AT1G24020,AT1G32640,AT1G34670,AT1G35720,AT1G45249,AT1G50420,AT1G52570,AT1G60900,AT1G62660,AT1G65790,AT1G66340,AT1G67120,AT1G68320,AT1G70670,AT1G71830,AT1G74660,AT1G77120,AT1G78300,AT1G80710,AT1G80730,AT2G01570,AT2G01950,AT2G03500,AT2G04240,AT2G14900,AT2G18420,AT2G21130…	UN003240,UN016726,UN016249,UN000022,UN016716,UN014632,UN010656,UN015927,UN018444,UN012900,UN015290,UN020364,UN014657,UN007148,UN030009,UN033386,UN019496,UN006133,UN077113,UN035408,UN030129,UN034348,UN020938,UN029754,UN046721,UN029435,UN004785,UN001297,UN038968,UN017825,UN017851,UN004764,UN004543,UN009923,UN031736,UN006720,UN005097,UN004924,UN000009,UN013582,UN036725,UN010535,UN036269,UN025926,UN0…
	GO:0044283	small molecule biosynthetic process	2.74548e-05	759	92|106	AT1G08250,AT1G08980,AT1G13280,AT1G13440,AT1G14520,AT1G19250,AT1G19640,AT1G20510,AT1G20780,AT1G22410,AT1G30040,AT1G43800,AT1G52340,AT1G55920,AT1G64660,AT1G65290,AT1G68320,AT1G68760,AT1G71750,AT1G73805,AT1G74470,AT1G74910,AT1G76690,AT1G78510,AT1G79900,AT1G80050,AT2G04240,AT2G17630,AT2G20360,AT2G22240,AT2G22250,AT2G26560,AT2G26640,AT2G26800,AT2G28880,AT2G30490,AT2G31810,AT2G34770,AT2G37040,AT2G43710…	UN006761,UN009238,UN032858,UN018770,UN032381,UN020668,UN015379,UN018639,UN007958,UN000417,UN008795,UN017849,UN019877,UN018609,UN016004,UN011572,UN020060,UN013582,UN024153,UN021478,UN011859,UN012577,UN011319,UN022180,UN009753,UN004321,UN008573,UN021906,UN014382,UN012271,UN010775,UN011951,UN032806,UN063313,UN010171,UN043516,UN036528,UN037239,UN010447,UN002323,UN012062,UN017493,UN020125,UN005000,UN0…
	GO:0009415	response to water	7.11706e-05	401	57|70	AT1G05180,AT1G05680,AT1G08810,AT1G12110,AT1G13740,AT1G22810,AT1G30270,AT1G32640,AT1G35720,AT1G45249,AT1G52340,AT1G62660,AT1G63490,AT1G64660,AT1G68090,AT1G70670,AT1G77120,AT1G78080,AT1G80710,AT2G20880,AT2G21660,AT2G30580,AT2G33590,AT2G37040,AT2G37170,AT2G41010,AT2G46680,AT2G47180,AT3G04070,AT3G05500,AT3G12630,AT3G14440,AT3G23250,AT3G54770,AT3G54820,AT3G56400,AT3G57540,AT4G02280,AT4G17870,AT4G20260…	UN005072,UN014632,UN020364,UN006512,UN007148,UN029108,UN005530,UN007404,UN004785,UN001297,UN017825,UN017851,UN018609,UN031736,UN006720,UN000216,UN011572,UN016070,UN008982,UN036725,UN025926,UN014086,UN009988,UN009981,UN004140,UN054158,UN011347,UN016582,UN063287,UN027933,UN018683,UN005000,UN054625,UN025243,UN020461,UN017912,UN016145,UN017141,UN018913,UN026377,UN030004,UN006571,UN006583,UN021334,UN0…
	GO:0071456	cellular response to hypoxia	7.54948e-05	238	40|66	AT1G01720,AT1G09070,AT1G10140,AT1G13360,AT1G14550,AT1G19250,AT1G19530,AT1G23710,AT1G25550,AT1G30040,AT1G43800,AT1G55810,AT1G77120,AT1G78070,AT2G15890,AT2G23270,AT2G26560,AT2G33590,AT2G41010,AT3G02550,AT3G10040,AT3G43190,AT3G56400,AT3G60520,AT4G10265,AT4G26270,AT4G27280,AT4G27450,AT4G30370,AT4G30440,AT4G38470,AT5G06320,AT5G15120,AT5G24530,AT5G39890,AT5G42050,AT5G45340,AT5G47060,AT5G57560,AT5G58070	UN016726,UN016249,UN012951,UN024417,UN019503,UN031561,UN025088,UN025395,UN015379,UN039610,UN039609,UN013386,UN017116,UN017849,UN019877,UN012224,UN025926,UN014086,UN008434,UN027543,UN060868,UN063313,UN010171,UN016582,UN063287,UN027933,UN018683,UN025243,UN030437,UN012629,UN023993,UN006383,UN015991,UN003708,UN019005,UN030416,UN028007,UN047971,UN021973,UN056069,UN063786,UN039215,UN033558,UN051659,UN0…
	GO:0009414	response to water deprivation	8.5097e-05	393	56|68	AT1G05180,AT1G05680,AT1G08810,AT1G12110,AT1G13740,AT1G22810,AT1G30270,AT1G32640,AT1G35720,AT1G45249,AT1G52340,AT1G62660,AT1G63490,AT1G64660,AT1G68090,AT1G70670,AT1G77120,AT1G78080,AT1G80710,AT2G20880,AT2G21660,AT2G30580,AT2G33590,AT2G37040,AT2G37170,AT2G41010,AT2G46680,AT2G47180,AT3G05500,AT3G12630,AT3G14440,AT3G23250,AT3G54770,AT3G54820,AT3G56400,AT3G57540,AT4G02280,AT4G17870,AT4G20260,AT4G25480…	UN005072,UN014632,UN020364,UN006512,UN007148,UN029108,UN005530,UN007404,UN004785,UN001297,UN017825,UN017851,UN018609,UN031736,UN006720,UN000216,UN011572,UN016070,UN008982,UN036725,UN025926,UN014086,UN009988,UN009981,UN004140,UN054158,UN011347,UN016582,UN063287,UN027933,UN018683,UN005000,UN054625,UN025243,UN020461,UN017912,UN018913,UN026377,UN030004,UN006571,UN006583,UN021334,UN025352,UN036938,UN0…
	GO:0071453	cellular response to oxygen levels	9.53589e-05	240	40|66	AT1G01720,AT1G09070,AT1G10140,AT1G13360,AT1G14550,AT1G19250,AT1G19530,AT1G23710,AT1G25550,AT1G30040,AT1G43800,AT1G55810,AT1G77120,AT1G78070,AT2G15890,AT2G23270,AT2G26560,AT2G33590,AT2G41010,AT3G02550,AT3G10040,AT3G43190,AT3G56400,AT3G60520,AT4G10265,AT4G26270,AT4G27280,AT4G27450,AT4G30370,AT4G30440,AT4G38470,AT5G06320,AT5G15120,AT5G24530,AT5G39890,AT5G42050,AT5G45340,AT5G47060,AT5G57560,AT5G58070	UN016726,UN016249,UN012951,UN024417,UN019503,UN031561,UN025088,UN025395,UN015379,UN039610,UN039609,UN013386,UN017116,UN017849,UN019877,UN012224,UN025926,UN014086,UN008434,UN027543,UN060868,UN063313,UN010171,UN016582,UN063287,UN027933,UN018683,UN025243,UN030437,UN012629,UN023993,UN006383,UN015991,UN003708,UN019005,UN030416,UN028007,UN047971,UN021973,UN056069,UN063786,UN039215,UN033558,UN051659,UN0…
	GO:0036294	cellular response to decreased oxygen levels	9.53589e-05	240	40|66	AT1G01720,AT1G09070,AT1G10140,AT1G13360,AT1G14550,AT1G19250,AT1G19530,AT1G23710,AT1G25550,AT1G30040,AT1G43800,AT1G55810,AT1G77120,AT1G78070,AT2G15890,AT2G23270,AT2G26560,AT2G33590,AT2G41010,AT3G02550,AT3G10040,AT3G43190,AT3G56400,AT3G60520,AT4G10265,AT4G26270,AT4G27280,AT4G27450,AT4G30370,AT4G30440,AT4G38470,AT5G06320,AT5G15120,AT5G24530,AT5G39890,AT5G42050,AT5G45340,AT5G47060,AT5G57560,AT5G58070	UN016726,UN016249,UN012951,UN024417,UN019503,UN031561,UN025088,UN025395,UN015379,UN039610,UN039609,UN013386,UN017116,UN017849,UN019877,UN012224,UN025926,UN014086,UN008434,UN027543,UN060868,UN063313,UN010171,UN016582,UN063287,UN027933,UN018683,UN025243,UN030437,UN012629,UN023993,UN006383,UN015991,UN003708,UN019005,UN030416,UN028007,UN047971,UN021973,UN056069,UN063786,UN039215,UN033558,UN051659,UN0…
	GO:0046686	response to cadmium ion	0.000131008	348	51|73	AT1G01060,AT1G02500,AT1G13440,AT1G35720,AT1G42970,AT1G52760,AT1G60420,AT1G63770,AT1G65930,AT1G68560,AT1G70170,AT1G74910,AT1G77120,AT2G17630,AT2G21660,AT2G21790,AT2G26560,AT2G30860,AT2G30970,AT2G33590,AT2G36530,AT2G41380,AT2G41690,AT2G46830,AT3G09440,AT3G09840,AT3G12500,AT3G12580,AT3G12670,AT3G17240,AT3G23250,AT3G25230,AT3G48990,AT3G52880,AT3G52990,AT3G60750,AT4G13930,AT4G34050,AT4G35090,AT4G38970…	UN003240,UN005806,UN032381,UN017825,UN011623,UN024890,UN005574,UN009318,UN002728,UN064416,UN001862,UN023228,UN011319,UN025926,UN014086,UN014382,UN054158,UN025149,UN063313,UN010171,UN040407,UN025705,UN016582,UN063287,UN027933,UN018683,UN038368,UN010472,UN021888,UN003358,UN043161,UN003716,UN053529,UN029811,UN036360,UN021381,UN019505,UN036579,UN019449,UN005537,UN028801,UN019013,UN029120,UN005567,UN0…
	GO:0001666	response to hypoxia	0.000156778	263	42|68	AT1G01720,AT1G09070,AT1G10140,AT1G13360,AT1G14550,AT1G19250,AT1G19530,AT1G23710,AT1G25550,AT1G30040,AT1G43800,AT1G55810,AT1G77120,AT1G78070,AT2G15890,AT2G23270,AT2G26560,AT2G33590,AT2G41010,AT3G02550,AT3G10040,AT3G20770,AT3G43190,AT3G56400,AT3G60520,AT4G10265,AT4G26270,AT4G27280,AT4G27450,AT4G30370,AT4G30440,AT4G38470,AT5G06320,AT5G15120,AT5G24530,AT5G39890,AT5G42050,AT5G45340,AT5G47060,AT5G57090…	UN016726,UN016249,UN012951,UN024417,UN019503,UN031561,UN025088,UN025395,UN015379,UN039610,UN039609,UN013386,UN017116,UN017849,UN019877,UN012224,UN025926,UN014086,UN008434,UN027543,UN060868,UN063313,UN010171,UN016582,UN063287,UN027933,UN018683,UN025243,UN030437,UN012629,UN023993,UN006383,UN009216,UN015991,UN003708,UN019005,UN030416,UN028007,UN047971,UN021973,UN056069,UN063786,UN039215,UN033558,UN0…
	GO:0080167	response to karrikin	0.000211308	133	27|36	AT1G05680,AT1G44575,AT1G50900,AT2G16660,AT2G23910,AT2G30490,AT2G37040,AT2G47930,AT3G09440,AT3G21090,AT3G47470,AT3G53260,AT3G57520,AT4G01970,AT4G02940,AT4G13510,AT4G27030,AT4G27280,AT4G33150,AT5G05270,AT5G05600,AT5G17050,AT5G18470,AT5G48540,AT5G51550,AT5G64410,AT5G64620	UN014632,UN023481,UN028933,UN012471,UN007531,UN017288,UN016935,UN012062,UN005000,UN032301,UN043161,UN028536,UN029080,UN017661,UN025558,UN003257,UN009890,UN002355,UN004034,UN003711,UN011265,UN006359,UN021209,UN019603,UN029556,UN006044,UN023506,UN015158,UN014252,UN011088,UN008537,UN025758,UN009042,UN004403,UN032872,UN037255
	GO:0072330	monocarboxylic acid biosynthetic process	0.000227616	276	43|50	AT1G08980,AT1G13280,AT1G19250,AT1G19640,AT1G20510,AT1G20780,AT1G43800,AT1G52340,AT1G65290,AT1G73805,AT1G76690,AT2G04240,AT2G26560,AT2G26640,AT2G28880,AT2G34770,AT2G37040,AT2G43710,AT3G01420,AT3G10340,AT3G12120,AT3G14440,AT3G19260,AT3G23820,AT3G45140,AT3G47340,AT3G53260,AT3G61510,AT4G27030,AT4G30440,AT4G33950,AT4G36830,AT5G04760,AT5G05580,AT5G10480,AT5G13420,AT5G23190,AT5G27200,AT5G42650,AT5G57580…	UN032858,UN018770,UN015379,UN018639,UN007958,UN000417,UN019877,UN018609,UN020060,UN011859,UN022180,UN021906,UN063313,UN010171,UN043516,UN036528,UN037239,UN002323,UN020125,UN005000,UN026283,UN008334,UN006526,UN014831,UN006571,UN006583,UN011381,UN025456,UN000495,UN003714,UN005150,UN025558,UN009807,UN010550,UN019603,UN016294,UN006289,UN024930,UN020033,UN008326,UN022213,UN004889,UN006987,UN029846,UN0…
	GO:0036293	response to decreased oxygen levels	0.000239793	267	42|68	AT1G01720,AT1G09070,AT1G10140,AT1G13360,AT1G14550,AT1G19250,AT1G19530,AT1G23710,AT1G25550,AT1G30040,AT1G43800,AT1G55810,AT1G77120,AT1G78070,AT2G15890,AT2G23270,AT2G26560,AT2G33590,AT2G41010,AT3G02550,AT3G10040,AT3G20770,AT3G43190,AT3G56400,AT3G60520,AT4G10265,AT4G26270,AT4G27280,AT4G27450,AT4G30370,AT4G30440,AT4G38470,AT5G06320,AT5G15120,AT5G24530,AT5G39890,AT5G42050,AT5G45340,AT5G47060,AT5G57090…	UN016726,UN016249,UN012951,UN024417,UN019503,UN031561,UN025088,UN025395,UN015379,UN039610,UN039609,UN013386,UN017116,UN017849,UN019877,UN012224,UN025926,UN014086,UN008434,UN027543,UN060868,UN063313,UN010171,UN016582,UN063287,UN027933,UN018683,UN025243,UN030437,UN012629,UN023993,UN006383,UN009216,UN015991,UN003708,UN019005,UN030416,UN028007,UN047971,UN021973,UN056069,UN063786,UN039215,UN033558,UN0…
	GO:0070482	response to oxygen levels	0.000266205	268	42|68	AT1G01720,AT1G09070,AT1G10140,AT1G13360,AT1G14550,AT1G19250,AT1G19530,AT1G23710,AT1G25550,AT1G30040,AT1G43800,AT1G55810,AT1G77120,AT1G78070,AT2G15890,AT2G23270,AT2G26560,AT2G33590,AT2G41010,AT3G02550,AT3G10040,AT3G20770,AT3G43190,AT3G56400,AT3G60520,AT4G10265,AT4G26270,AT4G27280,AT4G27450,AT4G30370,AT4G30440,AT4G38470,AT5G06320,AT5G15120,AT5G24530,AT5G39890,AT5G42050,AT5G45340,AT5G47060,AT5G57090…	UN016726,UN016249,UN012951,UN024417,UN019503,UN031561,UN025088,UN025395,UN015379,UN039610,UN039609,UN013386,UN017116,UN017849,UN019877,UN012224,UN025926,UN014086,UN008434,UN027543,UN060868,UN063313,UN010171,UN016582,UN063287,UN027933,UN018683,UN025243,UN030437,UN012629,UN023993,UN006383,UN009216,UN015991,UN003708,UN019005,UN030416,UN028007,UN047971,UN021973,UN056069,UN063786,UN039215,UN033558,UN0…
	GO:0016053	organic acid biosynthetic process	0.000320308	578	72|84	AT1G08250,AT1G08980,AT1G13280,AT1G14520,AT1G19250,AT1G19640,AT1G20510,AT1G20780,AT1G22410,AT1G30040,AT1G43800,AT1G52340,AT1G55920,AT1G64660,AT1G65290,AT1G68320,AT1G73805,AT1G74910,AT1G76690,AT1G79900,AT2G04240,AT2G17630,AT2G22250,AT2G26560,AT2G26640,AT2G28880,AT2G31810,AT2G34770,AT2G37040,AT2G43710,AT2G44160,AT3G01420,AT3G06350,AT3G10340,AT3G12120,AT3G14440,AT3G19260,AT3G20770,AT3G23820,AT3G45140…	UN006761,UN009238,UN032858,UN018770,UN020668,UN015379,UN018639,UN007958,UN000417,UN008795,UN017849,UN019877,UN018609,UN016004,UN011572,UN020060,UN013582,UN011859,UN011319,UN022180,UN004321,UN021906,UN014382,UN032806,UN063313,UN010171,UN043516,UN036528,UN037239,UN002323,UN017493,UN020125,UN005000,UN026283,UN017968,UN008334,UN007171,UN006526,UN014831,UN006571,UN006583,UN011381,UN009216,UN025456,UN0…
	GO:0046394	carboxylic acid biosynthetic process	0.000320308	578	72|84	AT1G08250,AT1G08980,AT1G13280,AT1G14520,AT1G19250,AT1G19640,AT1G20510,AT1G20780,AT1G22410,AT1G30040,AT1G43800,AT1G52340,AT1G55920,AT1G64660,AT1G65290,AT1G68320,AT1G73805,AT1G74910,AT1G76690,AT1G79900,AT2G04240,AT2G17630,AT2G22250,AT2G26560,AT2G26640,AT2G28880,AT2G31810,AT2G34770,AT2G37040,AT2G43710,AT2G44160,AT3G01420,AT3G06350,AT3G10340,AT3G12120,AT3G14440,AT3G19260,AT3G20770,AT3G23820,AT3G45140…	UN006761,UN009238,UN032858,UN018770,UN020668,UN015379,UN018639,UN007958,UN000417,UN008795,UN017849,UN019877,UN018609,UN016004,UN011572,UN020060,UN013582,UN011859,UN011319,UN022180,UN004321,UN021906,UN014382,UN032806,UN063313,UN010171,UN043516,UN036528,UN037239,UN002323,UN017493,UN020125,UN005000,UN026283,UN017968,UN008334,UN007171,UN006526,UN014831,UN006571,UN006583,UN011381,UN009216,UN025456,UN0…
	GO:0009699	phenylpropanoid biosynthetic process	0.000455969	98	22|31	AT1G15950,AT1G52760,AT1G61820,AT2G37040,AT3G10340,AT3G12900,AT3G17390,AT3G53260,AT4G01070,AT4G22880,AT4G31940,AT4G34050,AT4G34230,AT4G36220,AT4G39230,AT4G39330,AT5G05340,AT5G13420,AT5G23190,AT5G48930,AT5G54160,AT5G66390	UN015288,UN024890,UN010459,UN005000,UN006526,UN018640,UN017338,UN025558,UN013369,UN007768,UN013381,UN010665,UN028811,UN012346,UN033178,UN012952,UN036743,UN008077,UN021231,UN042698,UN027229,UN020944,UN004889,UN006987,UN009620,UN026378,UN012662,UN035081,UN015412,UN019341,UN018693
	GO:0033554	cellular response to stress	0.000518424	1317	135|183	AT1G01720,AT1G03060,AT1G05010,AT1G05180,AT1G05200,AT1G05680,AT1G06410,AT1G09070,AT1G10140,AT1G10520,AT1G13360,AT1G14550,AT1G18260,AT1G19100,AT1G19250,AT1G19530,AT1G22810,AT1G23710,AT1G23870,AT1G25550,AT1G29290,AT1G29630,AT1G30040,AT1G32540,AT1G32640,AT1G34190,AT1G43800,AT1G46264,AT1G48310,AT1G53210,AT1G54490,AT1G55810,AT1G55920,AT1G56500,AT1G62300,AT1G64660,AT1G65470,AT1G66340,AT1G68320,AT1G68760…	UN016726,UN016249,UN000022,UN016716,UN005072,UN003314,UN014632,UN000800,UN012951,UN024417,UN008082,UN019503,UN031561,UN025088,UN025395,UN006488,UN008002,UN015379,UN039610,UN039609,UN029108,UN013386,UN002813,UN017116,UN031070,UN029073,UN006169,UN017849,UN028599,UN004785,UN001297,UN011298,UN019877,UN023533,UN023483,UN005465,UN005345,UN001757,UN012224,UN016004,UN001672,UN005257,UN011572,UN003202,UN0…
	GO:0009698	phenylpropanoid metabolic process	0.000535736	139	27|38	AT1G15950,AT1G51680,AT1G52760,AT1G55270,AT1G61820,AT1G65060,AT2G30490,AT2G37040,AT3G10340,AT3G12900,AT3G17390,AT3G53260,AT4G01070,AT4G22880,AT4G31940,AT4G34050,AT4G34230,AT4G36220,AT4G39230,AT4G39330,AT5G05340,AT5G13420,AT5G17050,AT5G23190,AT5G48930,AT5G54160,AT5G66390	UN015288,UN009196,UN024890,UN013159,UN018755,UN010459,UN010433,UN012062,UN005000,UN006526,UN018640,UN017338,UN025558,UN013369,UN007768,UN013381,UN010665,UN028811,UN012346,UN033178,UN012952,UN036743,UN008077,UN021231,UN042698,UN027229,UN020944,UN004889,UN014252,UN011088,UN006987,UN009620,UN026378,UN012662,UN035081,UN015412,UN019341,UN018693
	GO:0006091	generation of precursor metabolites and energy	0.000566395	554	69|81	AT1G08380,AT1G13440,AT1G13700,AT1G15820,AT1G19530,AT1G20340,AT1G22170,AT1G27680,AT1G28480,AT1G32070,AT1G60950,AT1G65930,AT1G67740,AT1G76550,AT1G77370,AT1G79040,AT2G01290,AT2G02850,AT2G07689,AT2G15780,AT2G22480,AT2G26800,AT2G30570,AT2G32300,AT2G36530,AT2G46820,AT3G02360,AT3G17240,AT3G20570,AT3G24170,AT3G47470,AT3G52200,AT3G52990,AT3G60280,AT3G60750,AT3G61470,AT4G01050,AT4G02530,AT4G04950,AT4G10340…	UN031573,UN032381,UN014483,UN016117,UN016540,UN039610,UN039609,UN028676,UN010832,UN004023,UN031909,UN026979,UN037210,UN064416,UN025207,UN007660,UN023112,UN028932,UN017018,UN038235,UN033967,UN010994,UN032761,UN005604,UN010447,UN027731,UN051589,UN054589,UN054590,UN038368,UN024685,UN024781,UN010704,UN010703,UN037875,UN027757,UN010353,UN017661,UN009135,UN010359,UN029791,UN028754,UN039160,UN019548,UN0…
	GO:0010038	response to metal ion	0.000630031	491	63|87	AT1G01060,AT1G02500,AT1G05010,AT1G13440,AT1G20340,AT1G35720,AT1G42970,AT1G51340,AT1G52760,AT1G60420,AT1G63770,AT1G65930,AT1G66340,AT1G68560,AT1G70170,AT1G74910,AT1G77120,AT2G17630,AT2G21660,AT2G21790,AT2G26560,AT2G30860,AT2G30970,AT2G33590,AT2G36530,AT2G39450,AT2G40300,AT2G41380,AT2G41690,AT2G46830,AT3G09440,AT3G09840,AT3G12500,AT3G12580,AT3G12670,AT3G12900,AT3G17240,AT3G20770,AT3G23250,AT3G25230…	UN003240,UN005806,UN016716,UN032381,UN028676,UN017825,UN011623,UN009048,UN024890,UN005574,UN009318,UN002728,UN064416,UN004924,UN001862,UN023228,UN011319,UN025926,UN014086,UN014382,UN054158,UN025149,UN063313,UN010171,UN040407,UN025705,UN016582,UN063287,UN027933,UN018683,UN038368,UN024648,UN047113,UN010472,UN021888,UN003358,UN043161,UN003716,UN053529,UN029811,UN036360,UN021381,UN019505,UN036579,UN0…
	GO:0009737	response to abscisic acid	0.000734214	646	77|100	AT1G01060,AT1G01720,AT1G03060,AT1G05680,AT1G07430,AT1G08650,AT1G08810,AT1G10430,AT1G13740,AT1G15100,AT1G15380,AT1G17840,AT1G24020,AT1G32640,AT1G34670,AT1G35720,AT1G45249,AT1G52570,AT1G60900,AT1G62660,AT1G65790,AT1G66340,AT1G67120,AT1G70670,AT1G74660,AT1G77120,AT1G80710,AT1G80730,AT2G01570,AT2G26110,AT2G33540,AT2G33590,AT2G36530,AT2G37170,AT2G37220,AT2G38280,AT2G38310,AT2G46680,AT2G46820,AT2G46830…	UN003240,UN016726,UN016249,UN000022,UN014632,UN010656,UN015927,UN018444,UN012900,UN015290,UN020364,UN014657,UN007148,UN030009,UN033386,UN019496,UN006133,UN077113,UN035408,UN030129,UN034348,UN020938,UN029754,UN046721,UN029435,UN004785,UN001297,UN038968,UN017825,UN017851,UN004543,UN009923,UN031736,UN006720,UN005097,UN004924,UN000009,UN036725,UN036269,UN025926,UN014086,UN009981,UN021586,UN004596,UN0…
	GO:0044238	primary metabolic process	0.00075391	11143	842|1061	AT1G01040,AT1G01050,AT1G01060,AT1G01720,AT1G02640,AT1G02850,AT1G03140,AT1G03475,AT1G04010,AT1G04110,AT1G04530,AT1G04680,AT1G05180,AT1G05700,AT1G05790,AT1G06410,AT1G06800,AT1G06840,AT1G07210,AT1G07430,AT1G07570,AT1G07650,AT1G07705,AT1G08060,AT1G08070,AT1G08250,AT1G08360,AT1G08410,AT1G08650,AT1G08810,AT1G09250,AT1G09750,AT1G09970,AT1G10120,AT1G10430,AT1G10520,AT1G10600,AT1G11480,AT1G11545,AT1G11580…	UN000173,UN029860,UN018949,UN003240,UN016726,UN016249,UN002471,UN004408,UN012520,UN011558,UN015014,UN018851,UN002827,UN014044,UN013975,UN005072,UN003610,UN002218,UN000800,UN023491,UN002405,UN002160,UN018631,UN010656,UN015927,UN018444,UN012900,UN041127,UN001957,UN039789,UN000103,UN013892,UN006761,UN009238,UN028568,UN004799,UN015290,UN020364,UN033490,UN017428,UN001706,UN022010,UN014657,UN008082,UN0…
	GO:0015979	photosynthesis	0.000885409	280	42|47	AT1G08380,AT1G15820,AT1G20020,AT1G30380,AT1G31330,AT1G32060,AT1G32070,AT1G42970,AT1G44575,AT1G60950,AT1G67740,AT1G74470,AT1G76550,AT1G78510,AT1G79040,AT2G06520,AT2G20260,AT2G30570,AT2G40300,AT2G46820,AT2G47400,AT3G26650,AT3G47470,AT3G55800,AT3G60750,AT3G61470,AT4G01050,AT4G02530,AT4G10340,AT4G12800,AT4G15530,AT4G33520,AT5G24120,AT5G38410,AT5G38420,AT5G66570,ATCG00020,ATCG00280,ATCG00350,ATCG00490…	UN031573,UN016540,UN014685,UN025565,UN015262,UN010701,UN026979,UN011623,UN023481,UN037210,UN025207,UN012577,UN007660,UN009753,UN028932,UN022634,UN017613,UN025821,UN027731,UN047113,UN024685,UN024781,UN034318,UN012945,UN017661,UN016953,UN039160,UN019548,UN008507,UN022790,UN018827,UN028998,UN007985,UN025645,UN007504,UN017155,UN025402,UN021602,UN021603,UN020524,UN000193,UN027341,UN000322,UN000008,UN0…
	GO:0097305	response to alcohol	0.000933999	650	77|100	AT1G01060,AT1G01720,AT1G03060,AT1G05680,AT1G07430,AT1G08650,AT1G08810,AT1G10430,AT1G13740,AT1G15100,AT1G15380,AT1G17840,AT1G24020,AT1G32640,AT1G34670,AT1G35720,AT1G45249,AT1G52570,AT1G60900,AT1G62660,AT1G65790,AT1G66340,AT1G67120,AT1G70670,AT1G74660,AT1G77120,AT1G80710,AT1G80730,AT2G01570,AT2G26110,AT2G33540,AT2G33590,AT2G36530,AT2G37170,AT2G37220,AT2G38280,AT2G38310,AT2G46680,AT2G46820,AT2G46830…	UN003240,UN016726,UN016249,UN000022,UN014632,UN010656,UN015927,UN018444,UN012900,UN015290,UN020364,UN014657,UN007148,UN030009,UN033386,UN019496,UN006133,UN077113,UN035408,UN030129,UN034348,UN020938,UN029754,UN046721,UN029435,UN004785,UN001297,UN038968,UN017825,UN017851,UN004543,UN009923,UN031736,UN006720,UN005097,UN004924,UN000009,UN036725,UN036269,UN025926,UN014086,UN009981,UN021586,UN004596,UN0…
	GO:0009617	response to bacterium	0.00136824	513	64|93	AT1G08060,AT1G11580,AT1G13440,AT1G19180,AT1G19250,AT1G20020,AT1G32060,AT1G51090,AT1G61120,AT1G62660,AT1G64790,AT1G65930,AT1G66340,AT1G73805,AT2G15080,AT2G22240,AT2G30860,AT2G39050,AT2G40300,AT2G43120,AT2G43710,AT3G01420,AT3G04720,AT3G05200,AT3G12580,AT3G14460,AT3G20770,AT3G23820,AT3G45140,AT3G50950,AT3G53810,AT3G54420,AT3G55800,AT3G56400,AT4G01050,AT4G05200,AT4G11650,AT4G20260,AT4G23160,AT4G25030…	UN000103,UN013069,UN012311,UN032381,UN016703,UN015379,UN014685,UN010701,UN031866,UN005692,UN004112,UN031736,UN006720,UN000041,UN064416,UN004924,UN011859,UN001811,UN010775,UN011951,UN040407,UN014203,UN047113,UN016228,UN028231,UN026283,UN008334,UN025933,UN029895,UN030723,UN024568,UN030321,UN013350,UN036579,UN019449,UN005537,UN010031,UN001230,UN009216,UN025456,UN000495,UN003976,UN006601,UN033344,UN0…
	GO:0042493	response to drug	0.00199637	663	77|101	AT1G01060,AT1G05010,AT1G05680,AT1G08650,AT1G08810,AT1G14790,AT1G15380,AT1G15460,AT1G15520,AT1G28480,AT1G29290,AT1G32640,AT1G33110,AT1G34190,AT1G34670,AT1G47530,AT1G51340,AT1G51400,AT1G52760,AT1G61120,AT1G62300,AT1G62400,AT1G64380,AT1G68320,AT1G70520,AT1G77120,AT1G79900,AT2G01570,AT2G03530,AT2G04240,AT2G22240,AT2G26510,AT2G28710,AT2G29420,AT2G35800,AT2G40300,AT2G43710,AT2G46830,AT2G47180,AT3G01420…	UN003240,UN016716,UN014632,UN015290,UN020364,UN001302,UN019496,UN004933,UN002274,UN014144,UN000338,UN018711,UN037033,UN031909,UN031070,UN029073,UN004785,UN001297,UN011450,UN011298,UN038968,UN011253,UN009048,UN031027,UN031028,UN024890,UN005692,UN004112,UN005257,UN017872,UN015183,UN013582,UN006533,UN004998,UN025926,UN014086,UN004321,UN004596,UN013235,UN021906,UN010775,UN011951,UN007802,UN022091,UN0…
	GO:0009416	response to light stimulus	0.00215731	767	86|118	AT1G01060,AT1G08650,AT1G08810,AT1G10120,AT1G10520,AT1G12110,AT1G12910,AT1G15820,AT1G30040,AT1G35210,AT1G42970,AT1G44575,AT1G48410,AT1G51400,AT1G53380,AT1G56500,AT1G60950,AT1G62400,AT1G67740,AT1G68090,AT1G70170,AT1G73805,AT1G74660,AT1G75780,AT1G77760,AT1G78080,AT1G78600,AT1G80730,AT1G80920,AT2G01570,AT2G03500,AT2G21130,AT2G22240,AT2G26640,AT2G29090,AT2G31160,AT2G36530,AT2G37040,AT2G42080,AT2G46830…	UN003240,UN015290,UN020364,UN022010,UN008082,UN006512,UN017579,UN016540,UN017849,UN028996,UN029799,UN011623,UN023481,UN001155,UN031027,UN031028,UN013257,UN001672,UN037210,UN017872,UN025207,UN016070,UN008982,UN023228,UN011859,UN036269,UN020105,UN014987,UN022690,UN003914,UN009988,UN007168,UN007206,UN014196,UN021586,UN027588,UN004596,UN013480,UN017385,UN014535,UN010775,UN011951,UN043516,UN036528,UN0…
	GO:0009314	response to radiation	0.00251009	793	88|120	AT1G01060,AT1G08650,AT1G08810,AT1G10120,AT1G10520,AT1G12110,AT1G12910,AT1G15820,AT1G30040,AT1G35210,AT1G42970,AT1G44575,AT1G48410,AT1G51400,AT1G53380,AT1G56500,AT1G60950,AT1G62400,AT1G67740,AT1G68090,AT1G70170,AT1G73805,AT1G74660,AT1G75780,AT1G77760,AT1G78080,AT1G78600,AT1G80730,AT1G80920,AT2G01570,AT2G03500,AT2G21130,AT2G22240,AT2G26640,AT2G29090,AT2G31160,AT2G36530,AT2G37040,AT2G42080,AT2G46830…	UN003240,UN015290,UN020364,UN022010,UN008082,UN006512,UN017579,UN016540,UN017849,UN028996,UN029799,UN011623,UN023481,UN001155,UN031027,UN031028,UN013257,UN001672,UN037210,UN017872,UN025207,UN016070,UN008982,UN023228,UN011859,UN036269,UN020105,UN014987,UN022690,UN003914,UN009988,UN007168,UN007206,UN014196,UN021586,UN027588,UN004596,UN013480,UN017385,UN014535,UN010775,UN011951,UN043516,UN036528,UN0…
	GO:0009809	lignin biosynthetic process	0.00274803	49	14|21	AT1G15950,AT1G52760,AT1G61820,AT3G17390,AT4G01070,AT4G34050,AT4G34230,AT4G36220,AT4G39330,AT5G05340,AT5G13420,AT5G48930,AT5G54160,AT5G66390	UN015288,UN024890,UN010459,UN017338,UN013369,UN007768,UN033178,UN012952,UN036743,UN008077,UN042698,UN027229,UN020944,UN004889,UN009620,UN026378,UN012662,UN035081,UN015412,UN019341,UN018693
	GO:0010817	regulation of hormone levels	0.00334999	408	53|75	AT1G02500,AT1G02520,AT1G05010,AT1G05680,AT1G08410,AT1G08980,AT1G13280,AT1G14130,AT1G19640,AT1G20510,AT1G30040,AT1G30690,AT1G32070,AT1G44350,AT1G48410,AT1G66340,AT1G68130,AT1G68320,AT1G73805,AT1G75450,AT1G76690,AT1G77330,AT1G78570,AT2G23620,AT2G26710,AT2G37040,AT2G41010,AT2G41060,AT2G41510,AT2G47000,AT2G47260,AT3G02260,AT3G04070,AT3G13840,AT3G15010,AT3G19270,AT3G20860,AT3G45140,AT4G04950,AT4G10490…	UN005806,UN000802,UN028889,UN000988,UN016716,UN014632,UN004799,UN032858,UN018770,UN014625,UN018639,UN007958,UN017849,UN010270,UN026979,UN008885,UN001155,UN004924,UN056073,UN013582,UN011859,UN008602,UN022180,UN021032,UN005196,UN017021,UN012217,UN005000,UN025243,UN014648,UN014647,UN005088,UN033667,UN012671,UN000005,UN016145,UN017141,UN005638,UN004146,UN012183,UN006736,UN000495,UN010402,UN018682,UN0…
	GO:0019253	reductive pentose-phosphate cycle	0.00401107	21	9|11	AT1G32060,AT1G42970,AT2G47400,AT3G26650,AT3G55800,AT3G60750,AT5G38410,AT5G38420,ATCG00490	UN010701,UN011623,UN034318,UN012945,UN016953,UN039160,UN017155,UN025402,UN021602,UN021603,UN000013
	GO:0019685	photosynthesis, dark reaction	0.00401107	21	9|11	AT1G32060,AT1G42970,AT2G47400,AT3G26650,AT3G55800,AT3G60750,AT5G38410,AT5G38420,ATCG00490	UN010701,UN011623,UN034318,UN012945,UN016953,UN039160,UN017155,UN025402,UN021602,UN021603,UN000013
	GO:0009266	response to temperature stimulus	0.00518377	646	74|99	AT1G01060,AT1G05200,AT1G08810,AT1G09090,AT1G13080,AT1G15950,AT1G21760,AT1G24620,AT1G32060,AT1G35720,AT1G42970,AT1G45231,AT1G46264,AT1G52340,AT1G54490,AT1G55920,AT1G66340,AT1G68090,AT1G77120,AT1G78080,AT2G03500,AT2G20880,AT2G21660,AT2G22240,AT2G26640,AT2G28900,AT2G33590,AT2G33835,AT2G36530,AT2G37220,AT2G40300,AT2G41690,AT2G46830,AT2G47180,AT3G04880,AT3G09440,AT3G12580,AT3G16770,AT3G17390,AT3G22830…	UN003240,UN003314,UN020364,UN003334,UN012849,UN015288,UN019339,UN016929,UN022830,UN010701,UN017825,UN011623,UN003317,UN023533,UN023483,UN018609,UN001757,UN016004,UN004924,UN016070,UN008982,UN025926,UN014086,UN009988,UN013480,UN017385,UN004140,UN054158,UN010775,UN011951,UN043516,UN036528,UN037239,UN022917,UN016582,UN063287,UN027933,UN018683,UN004306,UN038368,UN015523,UN047113,UN021888,UN003358,UN0…
	GO:0042445	hormone metabolic process	0.0053932	300	42|55	AT1G02500,AT1G05010,AT1G05680,AT1G08980,AT1G13280,AT1G14130,AT1G19640,AT1G20510,AT1G30040,AT1G32070,AT1G44350,AT1G48410,AT1G66340,AT1G68130,AT1G68320,AT1G73805,AT1G75450,AT1G76690,AT1G77330,AT2G23620,AT2G26710,AT2G37040,AT2G41010,AT2G41060,AT2G41510,AT3G04070,AT3G13840,AT3G15010,AT3G19270,AT3G20860,AT3G45140,AT4G10490,AT4G35160,AT4G35190,AT4G36380,AT5G24530,AT5G33340,AT5G42650,AT5G54160,AT5G57580…	UN005806,UN016716,UN014632,UN032858,UN018770,UN014625,UN018639,UN007958,UN017849,UN026979,UN008885,UN001155,UN004924,UN056073,UN013582,UN011859,UN008602,UN022180,UN021032,UN017021,UN012217,UN005000,UN025243,UN014648,UN014647,UN005088,UN016145,UN017141,UN005638,UN004146,UN012183,UN006736,UN000495,UN018682,UN018642,UN018596,UN036625,UN019837,UN016059,UN017201,UN035791,UN027802,UN014419,UN011170,UN0…
	GO:0042742	defense response to bacterium	0.0070391	440	55|76	AT1G08060,AT1G13440,AT1G19180,AT1G19250,AT1G20020,AT1G32060,AT1G51090,AT1G64790,AT1G65930,AT1G66340,AT1G73805,AT2G15080,AT2G22240,AT2G30860,AT2G39050,AT2G43120,AT2G43710,AT3G01420,AT3G04720,AT3G05200,AT3G14460,AT3G20770,AT3G23820,AT3G50950,AT3G53810,AT3G55800,AT3G56400,AT4G01050,AT4G05200,AT4G11650,AT4G20260,AT4G23160,AT4G25030,AT4G26850,AT4G30440,AT4G31550,AT4G32260,AT4G33300,AT4G33950,AT4G36690…	UN000103,UN032381,UN016703,UN015379,UN014685,UN010701,UN031866,UN000041,UN064416,UN004924,UN011859,UN001811,UN010775,UN011951,UN040407,UN014203,UN016228,UN028231,UN026283,UN008334,UN025933,UN029895,UN030723,UN024568,UN030321,UN013350,UN010031,UN001230,UN009216,UN025456,UN003976,UN006601,UN016953,UN019005,UN008507,UN012565,UN029174,UN030961,UN027963,UN023291,UN034210,UN056370,UN006717,UN006973,UN0…
	GO:0044262	cellular carbohydrate metabolic process	0.00819188	508	61|76	AT1G01050,AT1G02640,AT1G06410,AT1G11545,AT1G14520,AT1G19940,AT1G23870,AT1G27680,AT1G28240,AT1G32170,AT1G32900,AT1G42430,AT1G51630,AT1G55850,AT1G62660,AT1G64390,AT1G68130,AT1G68560,AT1G70230,AT1G76550,AT1G78060,AT1G78240,AT2G18700,AT2G21770,AT2G22240,AT2G36870,AT3G02210,AT3G02360,AT3G16000,AT3G43190,AT3G51520,AT3G55800,AT4G02280,AT4G02290,AT4G02500,AT4G08170,AT4G13830,AT4G15290,AT4G17090,AT4G24000…	UN018949,UN002471,UN004408,UN000800,UN035224,UN020668,UN007258,UN002813,UN004023,UN003635,UN022800,UN010148,UN006079,UN007149,UN015073,UN013389,UN018062,UN069152,UN031736,UN006720,UN005321,UN025525,UN056073,UN001862,UN008021,UN007660,UN001259,UN002308,UN001640,UN001294,UN010775,UN011951,UN016965,UN015003,UN010704,UN010703,UN022799,UN015991,UN003708,UN026806,UN016953,UN003844,UN008864,UN006398,UN0…
	GO:0016051	carbohydrate biosynthetic process	0.00950704	380	49|63	AT1G06410,AT1G13440,AT1G14520,AT1G23870,AT1G27680,AT1G28240,AT1G32060,AT1G32900,AT1G42970,AT1G51630,AT1G55850,AT1G65290,AT1G74910,AT1G78240,AT2G18700,AT2G21770,AT2G22240,AT2G47400,AT3G02210,AT3G16000,AT3G20770,AT3G23820,AT3G26650,AT3G55800,AT3G57520,AT3G60750,AT4G01970,AT4G02500,AT4G15290,AT4G17090,AT4G24000,AT4G24010,AT4G26260,AT4G26850,AT4G30440,AT4G38970,AT5G03650,AT5G06610,AT5G13000,AT5G15470…	UN000800,UN032381,UN020668,UN002813,UN004023,UN003635,UN022800,UN010701,UN006079,UN011623,UN018062,UN069152,UN020060,UN011319,UN002308,UN001640,UN001294,UN010775,UN011951,UN034318,UN015003,UN022799,UN009216,UN025456,UN012945,UN016953,UN003257,UN009890,UN039160,UN002355,UN004034,UN003711,UN006398,UN031724,UN010009,UN027947,UN013313,UN044327,UN054778,UN006973,UN006231,UN011151,UN011322,UN016294,UN0…
	GO:0009813	flavonoid biosynthetic process	0.0115268	77	17|39	AT1G12910,AT1G32640,AT1G61720,AT1G78570,AT1G78600,AT2G02990,AT3G51240,AT4G22880,AT5G05270,AT5G05600,AT5G07990,AT5G13930,AT5G17050,AT5G24530,AT5G42800,AT5G48930,AT5G54160	UN017579,UN004785,UN001297,UN006552,UN006541,UN005196,UN007168,UN007206,UN014196,UN019401,UN012930,UN014114,UN013381,UN023506,UN015158,UN009999,UN020815,UN012228,UN023848,UN033533,UN023261,UN033032,UN043845,UN043692,UN026797,UN033031,UN014252,UN011088,UN011170,UN013989,UN005668,UN017274,UN016521,UN009620,UN026378,UN012662,UN035081,UN015412,UN019341
	GO:0044264	cellular polysaccharide metabolic process	0.0139245	322	43|54	AT1G01050,AT1G02640,AT1G11545,AT1G19940,AT1G27680,AT1G28240,AT1G32170,AT1G32900,AT1G42430,AT1G51630,AT1G55850,AT1G64390,AT1G68130,AT1G68560,AT1G70230,AT1G78060,AT1G78240,AT2G21770,AT2G36870,AT3G02210,AT3G16000,AT3G55800,AT4G02280,AT4G02290,AT4G02500,AT4G15290,AT4G17090,AT4G24000,AT4G24010,AT4G25810,AT5G03650,AT5G06610,AT5G13000,AT5G13870,AT5G15470,AT5G15740,AT5G40870,AT5G48300,AT5G49720,AT5G57560…	UN018949,UN002471,UN004408,UN035224,UN007258,UN004023,UN003635,UN022800,UN010148,UN006079,UN007149,UN015073,UN013389,UN018062,UN069152,UN005321,UN025525,UN056073,UN001862,UN008021,UN001259,UN002308,UN001294,UN016965,UN015003,UN022799,UN016953,UN003844,UN008864,UN006398,UN031724,UN010009,UN027947,UN013313,UN044327,UN023173,UN010530,UN033301,UN030454,UN020305,UN015630,UN000114,UN018429,UN006426,UN0…
	GO:0009743	response to carbohydrate	0.0158068	165	27|34	AT1G08810,AT1G42970,AT1G45249,AT1G52340,AT1G66340,AT1G72180,AT1G76550,AT1G77120,AT2G28060,AT2G28900,AT2G47400,AT3G20770,AT3G26650,AT3G47340,AT3G57540,AT4G02280,AT4G17670,AT4G20260,AT4G29130,AT5G03650,AT5G20700,AT5G24800,AT5G47060,AT5G57090,AT5G64930,AT5G65420,AT5G67030	UN020364,UN011623,UN017851,UN018609,UN004924,UN001192,UN001106,UN007660,UN025926,UN014086,UN025382,UN022917,UN034318,UN009216,UN012945,UN003714,UN005150,UN016270,UN003844,UN020332,UN023291,UN004711,UN010530,UN033301,UN030454,UN020305,UN023966,UN005368,UN005273,UN018577,UN013036,UN008821,UN021156,UN005158
	GO:1901576	organic substance biosynthetic process	0.0165239	5653	450|569	AT1G01060,AT1G01720,AT1G02500,AT1G03475,AT1G05010,AT1G06410,AT1G07210,AT1G07705,AT1G08060,AT1G08250,AT1G08360,AT1G08810,AT1G08980,AT1G09250,AT1G10120,AT1G10520,AT1G11480,AT1G11580,AT1G11880,AT1G12910,AT1G13280,AT1G13440,AT1G13740,AT1G14520,AT1G14790,AT1G15950,AT1G19100,AT1G19250,AT1G19640,AT1G20330,AT1G20340,AT1G20510,AT1G20780,AT1G21760,AT1G22015,AT1G22410,AT1G22810,AT1G23820,AT1G23870,AT1G24260…	UN003240,UN016726,UN016249,UN005806,UN015014,UN016716,UN000800,UN018631,UN039789,UN000103,UN006761,UN009238,UN028568,UN020364,UN032858,UN033490,UN022010,UN008082,UN026363,UN013069,UN012311,UN010693,UN017579,UN018770,UN032381,UN007148,UN020668,UN001302,UN015288,UN008002,UN015379,UN018639,UN013336,UN028676,UN007958,UN000417,UN019339,UN007600,UN008795,UN029108,UN011072,UN002813,UN027288,UN037779,UN0…
	GO:0051716	cellular response to stimulus	0.017981	3473	292|375	AT1G01720,AT1G02500,AT1G03060,AT1G05010,AT1G05180,AT1G05200,AT1G05680,AT1G06410,AT1G07430,AT1G08650,AT1G09070,AT1G09090,AT1G10140,AT1G10430,AT1G10520,AT1G12110,AT1G13360,AT1G13740,AT1G14550,AT1G15100,AT1G15380,AT1G15460,AT1G16120,AT1G18260,AT1G19100,AT1G19180,AT1G19250,AT1G19530,AT1G20925,AT1G21240,AT1G21410,AT1G22810,AT1G23710,AT1G23870,AT1G24020,AT1G25550,AT1G28480,AT1G29290,AT1G29630,AT1G30040…	UN016726,UN016249,UN005806,UN000022,UN016716,UN005072,UN003314,UN014632,UN000800,UN010656,UN015927,UN018444,UN012900,UN015290,UN012951,UN003334,UN024417,UN014657,UN008082,UN006512,UN019503,UN031561,UN007148,UN025088,UN025395,UN030009,UN033386,UN019496,UN004933,UN014497,UN006488,UN008002,UN016703,UN015379,UN039610,UN039609,UN011006,UN010461,UN018102,UN029108,UN013386,UN002813,UN035408,UN030129,UN0…
	GO:0009058	biosynthetic process	0.018508	5814	461|581	AT1G01060,AT1G01720,AT1G02500,AT1G03475,AT1G05010,AT1G06410,AT1G07210,AT1G07705,AT1G08060,AT1G08250,AT1G08360,AT1G08470,AT1G08810,AT1G08980,AT1G09250,AT1G10120,AT1G10520,AT1G11480,AT1G11580,AT1G11880,AT1G12910,AT1G13280,AT1G13440,AT1G13740,AT1G14520,AT1G14790,AT1G15950,AT1G19100,AT1G19250,AT1G19640,AT1G20330,AT1G20340,AT1G20510,AT1G20780,AT1G21760,AT1G22015,AT1G22410,AT1G22810,AT1G23820,AT1G23870…	UN003240,UN016726,UN016249,UN005806,UN015014,UN016716,UN000800,UN018631,UN039789,UN000103,UN006761,UN009238,UN028568,UN014844,UN020364,UN032858,UN033490,UN022010,UN008082,UN026363,UN013069,UN012311,UN010693,UN017579,UN018770,UN032381,UN007148,UN020668,UN001302,UN015288,UN008002,UN015379,UN018639,UN013336,UN028676,UN007958,UN000417,UN019339,UN007600,UN008795,UN029108,UN011072,UN002813,UN027288,UN0…
	GO:0009636	response to toxic substance	0.0212145	370	47|58	AT1G05680,AT1G08650,AT1G09090,AT1G12110,AT1G14550,AT1G17180,AT1G32540,AT1G34190,AT1G35720,AT1G52760,AT1G71695,AT1G77120,AT1G77370,AT1G77760,AT2G02380,AT2G17420,AT2G21045,AT2G22170,AT2G22240,AT2G29420,AT2G30860,AT2G31570,AT2G40300,AT2G41480,AT2G47180,AT3G01420,AT3G06590,AT3G12580,AT3G23560,AT3G24170,AT3G29035,AT3G52880,AT3G61440,AT4G01070,AT4G29210,AT4G35090,AT4G36430,AT4G37530,AT5G05340,AT5G05600…	UN014632,UN015290,UN003334,UN006512,UN025088,UN025395,UN027854,UN028599,UN011298,UN017825,UN024890,UN035029,UN033960,UN016436,UN025926,UN014086,UN023112,UN003914,UN013561,UN015863,UN031662,UN025010,UN010775,UN011951,UN027038,UN066351,UN040407,UN022895,UN047113,UN016542,UN017912,UN008334,UN025846,UN036579,UN019449,UN005537,UN011534,UN010353,UN068425,UN010700,UN011267,UN013369,UN007768,UN007506,UN0…
	GO:0044282	small molecule catabolic process	0.0224264	256	36|44	AT1G10430,AT1G14520,AT1G30040,AT1G64660,AT1G65520,AT1G71170,AT1G77120,AT2G02380,AT2G20340,AT2G26800,AT2G29090,AT2G37040,AT3G01420,AT3G02360,AT3G10340,AT3G17940,AT3G19270,AT3G47340,AT3G47800,AT3G48990,AT3G53260,AT4G10490,AT4G13930,AT4G13940,AT4G26260,AT4G29120,AT4G29130,AT4G31810,AT4G33150,AT5G17330,AT5G18200,AT5G24530,AT5G28050,AT5G45340,AT5G58220,AT5G65640	UN014657,UN020668,UN017849,UN011572,UN027312,UN014002,UN025926,UN014086,UN013561,UN014897,UN011185,UN009057,UN010447,UN012909,UN005000,UN008334,UN010704,UN010703,UN006526,UN052994,UN012183,UN003714,UN005150,UN016601,UN006817,UN025558,UN018682,UN012468,UN015685,UN013134,UN054778,UN015466,UN004711,UN013127,UN006044,UN001366,UN017430,UN011170,UN013989,UN005668,UN020081,UN008087,UN010528,UN020798
	GO:0009808	lignin metabolic process	0.0228604	73	16|23	AT1G15950,AT1G52760,AT1G61820,AT2G30490,AT2G37040,AT3G17390,AT4G01070,AT4G34050,AT4G34230,AT4G36220,AT4G39330,AT5G05340,AT5G13420,AT5G48930,AT5G54160,AT5G66390	UN015288,UN024890,UN010459,UN012062,UN005000,UN017338,UN013369,UN007768,UN033178,UN012952,UN036743,UN008077,UN042698,UN027229,UN020944,UN004889,UN009620,UN026378,UN012662,UN035081,UN015412,UN019341,UN018693
	GO:0009605	response to external stimulus	0.0244074	1840	168|234	AT1G01040,AT1G05010,AT1G05200,AT1G05680,AT1G08060,AT1G09750,AT1G09970,AT1G11580,AT1G12910,AT1G13440,AT1G14790,AT1G15460,AT1G15520,AT1G19100,AT1G19180,AT1G19250,AT1G20020,AT1G22810,AT1G25280,AT1G29290,AT1G29660,AT1G30270,AT1G32060,AT1G32540,AT1G32640,AT1G44350,AT1G47128,AT1G48410,AT1G49780,AT1G51090,AT1G53380,AT1G55920,AT1G60420,AT1G61120,AT1G62300,AT1G62660,AT1G64660,AT1G64790,AT1G65930,AT1G66340…	UN000173,UN029860,UN016716,UN003314,UN014632,UN000103,UN017428,UN001706,UN013069,UN012311,UN017579,UN032381,UN001302,UN004933,UN002274,UN014144,UN000338,UN018711,UN037033,UN008002,UN016703,UN015379,UN014685,UN029108,UN006397,UN031070,UN029073,UN018718,UN005530,UN007404,UN010701,UN028599,UN004785,UN001297,UN008885,UN020853,UN004758,UN001155,UN011872,UN031866,UN013257,UN016004,UN005574,UN009318,UN0…
	GO:0016054	organic acid catabolic process	0.0246075	169	27|34	AT1G10430,AT1G30040,AT1G64660,AT1G65520,AT1G71170,AT2G02380,AT2G20340,AT2G26800,AT2G29090,AT2G37040,AT3G01420,AT3G02360,AT3G10340,AT3G19270,AT3G47340,AT3G48990,AT3G53260,AT4G10490,AT4G13930,AT4G13940,AT4G29120,AT4G31810,AT4G33150,AT5G17330,AT5G24530,AT5G45340,AT5G65640	UN014657,UN017849,UN011572,UN027312,UN014002,UN013561,UN014897,UN011185,UN009057,UN010447,UN012909,UN005000,UN008334,UN010704,UN010703,UN006526,UN012183,UN003714,UN005150,UN006817,UN025558,UN018682,UN012468,UN015685,UN013134,UN015466,UN013127,UN006044,UN001366,UN011170,UN013989,UN005668,UN008087,UN020798
	GO:0046395	carboxylic acid catabolic process	0.0246075	169	27|34	AT1G10430,AT1G30040,AT1G64660,AT1G65520,AT1G71170,AT2G02380,AT2G20340,AT2G26800,AT2G29090,AT2G37040,AT3G01420,AT3G02360,AT3G10340,AT3G19270,AT3G47340,AT3G48990,AT3G53260,AT4G10490,AT4G13930,AT4G13940,AT4G29120,AT4G31810,AT4G33150,AT5G17330,AT5G24530,AT5G45340,AT5G65640	UN014657,UN017849,UN011572,UN027312,UN014002,UN013561,UN014897,UN011185,UN009057,UN010447,UN012909,UN005000,UN008334,UN010704,UN010703,UN006526,UN012183,UN003714,UN005150,UN006817,UN025558,UN018682,UN012468,UN015685,UN013134,UN015466,UN013127,UN006044,UN001366,UN011170,UN013989,UN005668,UN008087,UN020798
	GO:0006073	cellular glucan metabolic process	0.0246968	237	34|43	AT1G01050,AT1G11545,AT1G19940,AT1G27680,AT1G32170,AT1G32900,AT1G42430,AT1G55850,AT1G64390,AT1G68130,AT1G68560,AT1G70230,AT2G21770,AT2G36870,AT3G02210,AT3G16000,AT3G55800,AT4G02280,AT4G02290,AT4G02500,AT4G15290,AT4G17090,AT4G24000,AT4G24010,AT4G25810,AT5G03650,AT5G06610,AT5G13000,AT5G13870,AT5G40870,AT5G48300,AT5G49720,AT5G57560,AT5G65730	UN018949,UN035224,UN007258,UN004023,UN010148,UN006079,UN007149,UN015073,UN013389,UN069152,UN005321,UN025525,UN056073,UN001862,UN008021,UN001294,UN016965,UN015003,UN022799,UN016953,UN003844,UN008864,UN006398,UN031724,UN010009,UN027947,UN013313,UN044327,UN023173,UN010530,UN033301,UN030454,UN020305,UN015630,UN000114,UN018429,UN012453,UN012670,UN005410,UN041279,UN025044,UN019944,UN022410
	GO:0005976	polysaccharide metabolic process	0.0256189	516	60|82	AT1G01050,AT1G02640,AT1G04680,AT1G11545,AT1G11580,AT1G19940,AT1G26850,AT1G27680,AT1G28240,AT1G32170,AT1G32900,AT1G33170,AT1G42430,AT1G51630,AT1G55850,AT1G64390,AT1G67750,AT1G68130,AT1G68560,AT1G70230,AT1G78060,AT1G78240,AT2G21770,AT2G36870,AT2G43590,AT3G02210,AT3G07970,AT3G12500,AT3G16000,AT3G27400,AT3G49220,AT3G54420,AT3G55800,AT4G00740,AT4G02280,AT4G02290,AT4G02330,AT4G02500,AT4G13710,AT4G15290…	UN018949,UN002471,UN004408,UN013975,UN035224,UN013069,UN012311,UN007258,UN006309,UN004023,UN003635,UN022800,UN010148,UN006079,UN009279,UN007149,UN015073,UN013389,UN018062,UN069152,UN005321,UN025525,UN015976,UN065202,UN028600,UN056073,UN001862,UN008021,UN001259,UN002308,UN001294,UN016965,UN049099,UN015003,UN029192,UN022725,UN053529,UN029811,UN036360,UN021381,UN019505,UN022799,UN034360,UN034616,UN0…
	GO:0046677	response to antibiotic	0.0281874	342	44|60	AT1G01060,AT1G05200,AT1G05680,AT1G08650,AT1G08810,AT1G14790,AT1G15380,AT1G15520,AT1G28480,AT1G34190,AT1G34670,AT1G51400,AT1G52760,AT1G68320,AT1G70520,AT1G77120,AT2G01570,AT2G22240,AT2G29420,AT2G40300,AT2G43710,AT2G46830,AT2G47180,AT3G01420,AT3G06590,AT3G10985,AT3G12580,AT3G29035,AT3G49690,AT3G51440,AT3G56400,AT3G61190,AT4G03480,AT4G32940,AT4G35090,AT5G04760,AT5G06320,AT5G24530,AT5G27600,AT5G37260…	UN003240,UN003314,UN014632,UN015290,UN020364,UN001302,UN019496,UN002274,UN014144,UN000338,UN018711,UN037033,UN031909,UN011298,UN038968,UN031027,UN031028,UN024890,UN013582,UN006533,UN004998,UN025926,UN014086,UN004596,UN010775,UN011951,UN027038,UN066351,UN047113,UN026283,UN003358,UN017912,UN008334,UN025846,UN021642,UN036579,UN019449,UN005537,UN068425,UN014438,UN017026,UN019005,UN029835,UN017027,UN0…
	GO:0015977	carbon fixation	0.0313512	26	9|11	AT1G32060,AT1G42970,AT2G47400,AT3G26650,AT3G55800,AT3G60750,AT5G38410,AT5G38420,ATCG00490	UN010701,UN011623,UN034318,UN012945,UN016953,UN039160,UN017155,UN025402,UN021602,UN021603,UN000013
	GO:1901615	organic hydroxy compound metabolic process	0.0315489	365	46|54	AT1G04010,AT1G14520,AT1G20330,AT1G20780,AT1G43710,AT1G52340,AT1G65930,AT1G73805,AT1G74470,AT1G76490,AT1G78570,AT2G04240,AT2G22240,AT2G23620,AT2G26710,AT2G29090,AT2G34490,AT2G37040,AT2G41010,AT2G44450,AT3G01420,AT3G06350,AT3G07020,AT3G14440,AT3G19270,AT3G51520,AT4G08170,AT4G10490,AT4G12110,AT4G22880,AT4G26260,AT4G33360,AT4G34640,AT4G36380,AT5G01410,AT5G04760,AT5G13420,AT5G24530,AT5G33340,AT5G42650…	UN018851,UN020668,UN013336,UN000417,UN008141,UN018609,UN064416,UN011859,UN012577,UN006004,UN005196,UN021906,UN010775,UN011951,UN017021,UN012217,UN012909,UN010429,UN005000,UN025243,UN013933,UN008334,UN007171,UN007708,UN006571,UN006583,UN012183,UN026806,UN040796,UN018682,UN017058,UN013381,UN054778,UN026963,UN013251,UN027802,UN014419,UN015266,UN020033,UN004889,UN011170,UN013989,UN005668,UN018154,UN0…
	GO:0071554	cell wall organization or biogenesis	0.0316016	775	82|104	AT1G01050,AT1G02640,AT1G11545,AT1G11580,AT1G19900,AT1G19940,AT1G26850,AT1G28240,AT1G32170,AT1G32640,AT1G33170,AT1G48100,AT1G51630,AT1G55850,AT1G62440,AT1G64390,AT1G65680,AT1G66340,AT1G68560,AT1G70230,AT1G78060,AT1G78240,AT1G78570,AT1G79620,AT2G03090,AT2G04780,AT2G21770,AT2G27500,AT2G36870,AT2G40610,AT2G43590,AT2G43870,AT2G46770,AT3G02210,AT3G03220,AT3G07970,AT3G08900,AT3G09410,AT3G12500,AT3G13870…	UN018949,UN002471,UN004408,UN035224,UN013069,UN012311,UN006826,UN007258,UN006309,UN003635,UN022800,UN010148,UN004785,UN001297,UN009279,UN009664,UN011570,UN018062,UN069152,UN015949,UN005321,UN025525,UN027169,UN004924,UN001862,UN008021,UN001259,UN002308,UN005196,UN033349,UN017557,UN034964,UN022765,UN001294,UN010199,UN016965,UN022703,UN049099,UN017678,UN018661,UN015003,UN019211,UN029192,UN022725,UN0…
	GO:0044042	glucan metabolic process	0.0416105	243	34|43	AT1G01050,AT1G11545,AT1G19940,AT1G27680,AT1G32170,AT1G32900,AT1G42430,AT1G55850,AT1G64390,AT1G68130,AT1G68560,AT1G70230,AT2G21770,AT2G36870,AT3G02210,AT3G16000,AT3G55800,AT4G02280,AT4G02290,AT4G02500,AT4G15290,AT4G17090,AT4G24000,AT4G24010,AT4G25810,AT5G03650,AT5G06610,AT5G13000,AT5G13870,AT5G40870,AT5G48300,AT5G49720,AT5G57560,AT5G65730	UN018949,UN035224,UN007258,UN004023,UN010148,UN006079,UN007149,UN015073,UN013389,UN069152,UN005321,UN025525,UN056073,UN001862,UN008021,UN001294,UN016965,UN015003,UN022799,UN016953,UN003844,UN008864,UN006398,UN031724,UN010009,UN027947,UN013313,UN044327,UN023173,UN010530,UN033301,UN030454,UN020305,UN015630,UN000114,UN018429,UN012453,UN012670,UN005410,UN041279,UN025044,UN019944,UN022410
	GO:0006714	sesquiterpenoid metabolic process	0.0490289	47	12|16	AT1G20780,AT1G52340,AT2G04240,AT2G29090,AT3G14440,AT3G19270,AT4G16740,AT4G33360,AT5G04760,AT5G23960,AT5G45340,AT5G67030	UN000417,UN018609,UN021906,UN012909,UN006571,UN006583,UN012183,UN009755,UN032851,UN026963,UN020033,UN009597,UN011424,UN010086,UN008087,UN005158
	Cellular Component
	GO:0071944	cell periphery	5.19184e-10	4170	398|513	AT1G01800,AT1G02500,AT1G02520,AT1G02630,AT1G02640,AT1G04040,AT1G04110,AT1G05150,AT1G05200,AT1G06840,AT1G07430,AT1G07570,AT1G07650,AT1G08360,AT1G09070,AT1G09090,AT1G09750,AT1G09970,AT1G10090,AT1G10140,AT1G10200,AT1G10430,AT1G10630,AT1G11360,AT1G11545,AT1G11580,AT1G12110,AT1G13280,AT1G13440,AT1G15460,AT1G15520,AT1G16120,AT1G17840,AT1G19900,AT1G20780,AT1G20970,AT1G21240,AT1G21460,AT1G21680,AT1G23170…	UN071222,UN054987,UN005806,UN000802,UN028889,UN000988,UN017780,UN002471,UN004408,UN024661,UN002827,UN009588,UN003314,UN002405,UN002160,UN010656,UN015927,UN018444,UN012900,UN041127,UN001957,UN028568,UN012951,UN003334,UN017428,UN001706,UN005627,UN024417,UN019612,UN014657,UN026573,UN013923,UN022235,UN035224,UN013069,UN012311,UN006512,UN018770,UN032381,UN004933,UN002274,UN014144,UN000338,UN018711,UN0…
	GO:0005737	cytoplasm	2.43044e-09	10641	869|1082	AT1G01040,AT1G01050,AT1G01800,AT1G02500,AT1G03060,AT1G03475,AT1G04010,AT1G04040,AT1G05010,AT1G05150,AT1G05180,AT1G05200,AT1G06410,AT1G06470,AT1G06800,AT1G07210,AT1G07430,AT1G07705,AT1G08070,AT1G08080,AT1G08250,AT1G08360,AT1G08380,AT1G08410,AT1G08470,AT1G08570,AT1G08650,AT1G08800,AT1G08980,AT1G09070,AT1G09750,AT1G10200,AT1G10430,AT1G10600,AT1G10630,AT1G11360,AT1G11530,AT1G11580,AT1G11700,AT1G11880…	UN000173,UN029860,UN018949,UN071222,UN054987,UN005806,UN000022,UN015014,UN018851,UN024661,UN016716,UN009588,UN005072,UN003314,UN000800,UN006765,UN023491,UN018631,UN010656,UN015927,UN018444,UN012900,UN039789,UN013892,UN024968,UN020331,UN006761,UN009238,UN028568,UN031573,UN004799,UN014844,UN015151,UN015169,UN015290,UN001320,UN032858,UN012951,UN017428,UN019612,UN014657,UN013057,UN026573,UN013923,UN0…
	GO:0005618	cell wall	6.28027e-07	805	102|137	AT1G01800,AT1G02500,AT1G02640,AT1G04040,AT1G09750,AT1G11545,AT1G11580,AT1G13440,AT1G16120,AT1G19900,AT1G21680,AT1G32170,AT1G35720,AT1G48100,AT1G51630,AT1G56110,AT1G62440,AT1G65680,AT1G68560,AT1G71695,AT1G76160,AT1G78060,AT2G02990,AT2G03090,AT2G03430,AT2G09990,AT2G16250,AT2G16430,AT2G27500,AT2G28790,AT2G30490,AT2G34930,AT2G36870,AT2G40610,AT2G40830,AT2G44450,AT3G03220,AT3G05950,AT3G06130,AT3G07970…	UN071222,UN054987,UN005806,UN002471,UN004408,UN024661,UN017428,UN035224,UN013069,UN012311,UN032381,UN014497,UN006826,UN005429,UN010148,UN017825,UN009664,UN011570,UN018062,UN040527,UN015949,UN027169,UN001862,UN035029,UN033960,UN016436,UN009047,UN001259,UN019401,UN017557,UN034964,UN006949,UN031084,UN032652,UN031085,UN030142,UN011715,UN010199,UN027932,UN043637,UN044214,UN037688,UN012062,UN012782,UN0…
	GO:0030312	external encapsulating structure	7.17225e-07	807	102|137	AT1G01800,AT1G02500,AT1G02640,AT1G04040,AT1G09750,AT1G11545,AT1G11580,AT1G13440,AT1G16120,AT1G19900,AT1G21680,AT1G32170,AT1G35720,AT1G48100,AT1G51630,AT1G56110,AT1G62440,AT1G65680,AT1G68560,AT1G71695,AT1G76160,AT1G78060,AT2G02990,AT2G03090,AT2G03430,AT2G09990,AT2G16250,AT2G16430,AT2G27500,AT2G28790,AT2G30490,AT2G34930,AT2G36870,AT2G40610,AT2G40830,AT2G44450,AT3G03220,AT3G05950,AT3G06130,AT3G07970…	UN071222,UN054987,UN005806,UN002471,UN004408,UN024661,UN017428,UN035224,UN013069,UN012311,UN032381,UN014497,UN006826,UN005429,UN010148,UN017825,UN009664,UN011570,UN018062,UN040527,UN015949,UN027169,UN001862,UN035029,UN033960,UN016436,UN009047,UN001259,UN019401,UN017557,UN034964,UN006949,UN031084,UN032652,UN031085,UN030142,UN011715,UN010199,UN027932,UN043637,UN044214,UN037688,UN012062,UN012782,UN0…
	GO:0048046	apoplast	7.6509e-07	520	74|92	AT1G03475,AT1G04110,AT1G09750,AT1G11545,AT1G20020,AT1G26560,AT1G29290,AT1G29660,AT1G32060,AT1G32170,AT1G35720,AT1G42970,AT1G47128,AT1G63770,AT1G65930,AT1G68560,AT1G72150,AT1G76160,AT1G78060,AT1G79720,AT2G02850,AT2G10940,AT2G17230,AT2G21130,AT2G21660,AT2G28000,AT2G30860,AT2G36530,AT2G36870,AT2G44450,AT3G05950,AT3G09440,AT3G09840,AT3G12580,AT3G13750,AT3G17240,AT3G17940,AT3G20820,AT3G24870,AT3G26650…	UN015014,UN002827,UN017428,UN035224,UN014685,UN012778,UN031070,UN029073,UN018718,UN010701,UN010148,UN017825,UN011623,UN020853,UN004758,UN002728,UN064416,UN001862,UN030578,UN009047,UN001259,UN011158,UN038235,UN033967,UN029010,UN023355,UN014535,UN054158,UN007823,UN040407,UN038368,UN016965,UN013933,UN041843,UN043161,UN003716,UN036579,UN019449,UN005537,UN002850,UN007833,UN037875,UN052994,UN016563,UN0…
	GO:0110165	cellular anatomical entity	8.84439e-07	20067	1446|1801	AT1G01040,AT1G01050,AT1G01060,AT1G01720,AT1G01800,AT1G02500,AT1G02520,AT1G02630,AT1G02640,AT1G03060,AT1G03140,AT1G03475,AT1G04010,AT1G04040,AT1G04110,AT1G04530,AT1G04560,AT1G04680,AT1G04945,AT1G05010,AT1G05150,AT1G05180,AT1G05200,AT1G05680,AT1G05700,AT1G05790,AT1G06410,AT1G06470,AT1G06750,AT1G06800,AT1G06840,AT1G07210,AT1G07250,AT1G07430,AT1G07570,AT1G07650,AT1G07705,AT1G08060,AT1G08070,AT1G08080…	UN000173,UN029860,UN018949,UN003240,UN016726,UN016249,UN071222,UN054987,UN005806,UN000802,UN028889,UN000988,UN017780,UN002471,UN004408,UN000022,UN011558,UN015014,UN018851,UN024661,UN002827,UN014044,UN020425,UN013975,UN015402,UN013978,UN016716,UN009588,UN005072,UN003314,UN014632,UN003610,UN002218,UN000800,UN006765,UN009352,UN009257,UN023491,UN002405,UN002160,UN018631,UN054935,UN010656,UN015927,UN0…
	GO:0005829	cytosol	1.9262e-06	3402	318|420	AT1G01050,AT1G01800,AT1G02500,AT1G03475,AT1G05010,AT1G05180,AT1G06410,AT1G07430,AT1G08360,AT1G08410,AT1G08980,AT1G10430,AT1G10630,AT1G11360,AT1G11530,AT1G11580,AT1G13440,AT1G13700,AT1G15130,AT1G15950,AT1G17180,AT1G20580,AT1G22610,AT1G23440,AT1G23870,AT1G24020,AT1G25280,AT1G30270,AT1G30690,AT1G35720,AT1G36240,AT1G43710,AT1G48410,AT1G52340,AT1G52570,AT1G54490,AT1G55860,AT1G55920,AT1G59960,AT1G60420…	UN018949,UN071222,UN054987,UN005806,UN015014,UN016716,UN005072,UN000800,UN010656,UN015927,UN018444,UN012900,UN028568,UN004799,UN032858,UN014657,UN026573,UN013923,UN022235,UN029639,UN013069,UN012311,UN032381,UN014483,UN016117,UN004594,UN015288,UN027854,UN022514,UN028260,UN028337,UN002813,UN035408,UN030129,UN034348,UN020938,UN029754,UN046721,UN029435,UN006397,UN005530,UN007404,UN010270,UN017825,UN0…
	GO:0005622	intracellular	4.72861e-06	14822	1129|1396	AT1G01040,AT1G01050,AT1G01060,AT1G01720,AT1G01800,AT1G02500,AT1G03060,AT1G03140,AT1G03475,AT1G04010,AT1G04040,AT1G05010,AT1G05150,AT1G05180,AT1G05200,AT1G05680,AT1G06410,AT1G06470,AT1G06800,AT1G07210,AT1G07250,AT1G07430,AT1G07705,AT1G08060,AT1G08070,AT1G08080,AT1G08250,AT1G08360,AT1G08380,AT1G08410,AT1G08470,AT1G08570,AT1G08650,AT1G08800,AT1G08810,AT1G08980,AT1G09070,AT1G09250,AT1G09750,AT1G10120…	UN000173,UN029860,UN018949,UN003240,UN016726,UN016249,UN071222,UN054987,UN005806,UN000022,UN011558,UN015014,UN018851,UN024661,UN016716,UN009588,UN005072,UN003314,UN014632,UN000800,UN006765,UN023491,UN018631,UN054935,UN010656,UN015927,UN018444,UN012900,UN039789,UN000103,UN013892,UN024968,UN020331,UN006761,UN009238,UN028568,UN031573,UN004799,UN014844,UN015151,UN015169,UN015290,UN001320,UN020364,UN0…
	GO:0005886	plasma membrane	5.97437e-06	3503	323|411	AT1G02500,AT1G02520,AT1G02630,AT1G04110,AT1G05150,AT1G05200,AT1G06840,AT1G07430,AT1G07570,AT1G07650,AT1G08360,AT1G09070,AT1G09090,AT1G09970,AT1G10090,AT1G10140,AT1G10200,AT1G10430,AT1G10630,AT1G11360,AT1G12110,AT1G13280,AT1G13440,AT1G15460,AT1G15520,AT1G16120,AT1G17840,AT1G20780,AT1G20970,AT1G21240,AT1G21460,AT1G23170,AT1G25280,AT1G27190,AT1G29980,AT1G30080,AT1G30270,AT1G30690,AT1G31650,AT1G31770…	UN005806,UN000802,UN028889,UN000988,UN017780,UN002827,UN009588,UN003314,UN002405,UN002160,UN010656,UN015927,UN018444,UN012900,UN041127,UN001957,UN028568,UN012951,UN003334,UN001706,UN005627,UN024417,UN019612,UN014657,UN026573,UN013923,UN022235,UN006512,UN018770,UN032381,UN004933,UN002274,UN014144,UN000338,UN018711,UN037033,UN014497,UN006133,UN077113,UN000417,UN000360,UN010461,UN021694,UN007242,UN0…
	GO:0016020	membrane	1.10759e-05	9687	777|956	AT1G01800,AT1G02500,AT1G02520,AT1G02630,AT1G04010,AT1G04040,AT1G04110,AT1G04560,AT1G04680,AT1G04945,AT1G05150,AT1G05200,AT1G05700,AT1G05790,AT1G06470,AT1G06750,AT1G06840,AT1G07430,AT1G07570,AT1G07650,AT1G08360,AT1G08380,AT1G08470,AT1G08570,AT1G08800,AT1G09070,AT1G09090,AT1G09970,AT1G10090,AT1G10140,AT1G10200,AT1G10430,AT1G10600,AT1G10630,AT1G11360,AT1G11580,AT1G11880,AT1G12110,AT1G13080,AT1G13280…	UN071222,UN054987,UN005806,UN000802,UN028889,UN000988,UN017780,UN018851,UN024661,UN002827,UN020425,UN013975,UN015402,UN013978,UN009588,UN003314,UN003610,UN002218,UN006765,UN009352,UN009257,UN002405,UN002160,UN010656,UN015927,UN018444,UN012900,UN041127,UN001957,UN028568,UN031573,UN014844,UN015151,UN015169,UN001320,UN012951,UN003334,UN001706,UN005627,UN024417,UN019612,UN014657,UN013057,UN026573,UN0…
	GO:0009506	plasmodesma	1.88232e-05	1038	118|154	AT1G02520,AT1G04040,AT1G05150,AT1G08360,AT1G09970,AT1G13440,AT1G15130,AT1G19100,AT1G19260,AT1G22610,AT1G23170,AT1G35710,AT1G35720,AT1G47128,AT1G48090,AT1G48480,AT1G52760,AT1G53210,AT1G55860,AT1G56110,AT1G65930,AT1G67120,AT1G68560,AT1G70520,AT1G70600,AT1G71695,AT1G72150,AT1G72180,AT1G73960,AT1G76160,AT1G78060,AT1G78570,AT2G01950,AT2G09990,AT2G10940,AT2G13370,AT2G16250,AT2G16430,AT2G21130,AT2G21660…	UN000802,UN028889,UN000988,UN024661,UN009588,UN028568,UN001706,UN032381,UN004594,UN008002,UN030987,UN034669,UN028260,UN007242,UN022374,UN017825,UN020853,UN004758,UN000012,UN004766,UN024890,UN005345,UN000020,UN000017,UN040527,UN064416,UN000009,UN001862,UN006533,UN004998,UN033225,UN035029,UN033960,UN016436,UN030578,UN001192,UN001106,UN000547,UN009047,UN001259,UN005196,UN001591,UN031084,UN032652,UN0…
	GO:0070161	anchoring junction	1.98228e-05	1039	118|154	AT1G02520,AT1G04040,AT1G05150,AT1G08360,AT1G09970,AT1G13440,AT1G15130,AT1G19100,AT1G19260,AT1G22610,AT1G23170,AT1G35710,AT1G35720,AT1G47128,AT1G48090,AT1G48480,AT1G52760,AT1G53210,AT1G55860,AT1G56110,AT1G65930,AT1G67120,AT1G68560,AT1G70520,AT1G70600,AT1G71695,AT1G72150,AT1G72180,AT1G73960,AT1G76160,AT1G78060,AT1G78570,AT2G01950,AT2G09990,AT2G10940,AT2G13370,AT2G16250,AT2G16430,AT2G21130,AT2G21660…	UN000802,UN028889,UN000988,UN024661,UN009588,UN028568,UN001706,UN032381,UN004594,UN008002,UN030987,UN034669,UN028260,UN007242,UN022374,UN017825,UN020853,UN004758,UN000012,UN004766,UN024890,UN005345,UN000020,UN000017,UN040527,UN064416,UN000009,UN001862,UN006533,UN004998,UN033225,UN035029,UN033960,UN016436,UN030578,UN001192,UN001106,UN000547,UN009047,UN001259,UN005196,UN001591,UN031084,UN032652,UN0…
	GO:0005911	cell-cell junction	1.98228e-05	1039	118|154	AT1G02520,AT1G04040,AT1G05150,AT1G08360,AT1G09970,AT1G13440,AT1G15130,AT1G19100,AT1G19260,AT1G22610,AT1G23170,AT1G35710,AT1G35720,AT1G47128,AT1G48090,AT1G48480,AT1G52760,AT1G53210,AT1G55860,AT1G56110,AT1G65930,AT1G67120,AT1G68560,AT1G70520,AT1G70600,AT1G71695,AT1G72150,AT1G72180,AT1G73960,AT1G76160,AT1G78060,AT1G78570,AT2G01950,AT2G09990,AT2G10940,AT2G13370,AT2G16250,AT2G16430,AT2G21130,AT2G21660…	UN000802,UN028889,UN000988,UN024661,UN009588,UN028568,UN001706,UN032381,UN004594,UN008002,UN030987,UN034669,UN028260,UN007242,UN022374,UN017825,UN020853,UN004758,UN000012,UN004766,UN024890,UN005345,UN000020,UN000017,UN040527,UN064416,UN000009,UN001862,UN006533,UN004998,UN033225,UN035029,UN033960,UN016436,UN030578,UN001192,UN001106,UN000547,UN009047,UN001259,UN005196,UN001591,UN031084,UN032652,UN0…
[truncated: 26 more rows]

## Sheet: Table S8
	Table S8. Major enriched categories. Avocado differentially expressed UniGenes and belonging to the eight enriched categories selected and which were considered relevant and presumably involved in the infection process of F. kuroshium on the avocado stems. See the results (Figure 4) and discussion sections in the main text. This table is a subset of data selected from Table S6.
	UniGene Identifier	1-dpi		4-dpi		7-dpi		14-dpi			Arabidopsis thaliana based annotation
[truncated: 1,484 more rows]

## Sheet: Table S9
	Table S9. Over-represented KEGG number on the list of differentially expressed genes. This table is complementary to Table S7 and in similar way, KEGG numbers were classified using g:Profiler web tool (https://biit.cs.ut.ee/gprofiler/gost) and the list of Arabidopsis locus from those protein identified like homologs to the avocado unigenes (Table S2). g:SCS algorithm was selected to estimate the …
[truncated: 8 more rows]

[truncated: 5 more sheets: Table S10, Table S11, Table S12, Table S13, Table S14]
